# Supplementary material for: Small Brown Planthopper Nymph Infestation Regulates Plant Defenses by Affecting Secondary Metabolite Biosynthesis in Rice
Source: MDPI journal article supplement (doi:10.3390/ijms24054764), 2023-03-01
Supplement: s1 [file s1]

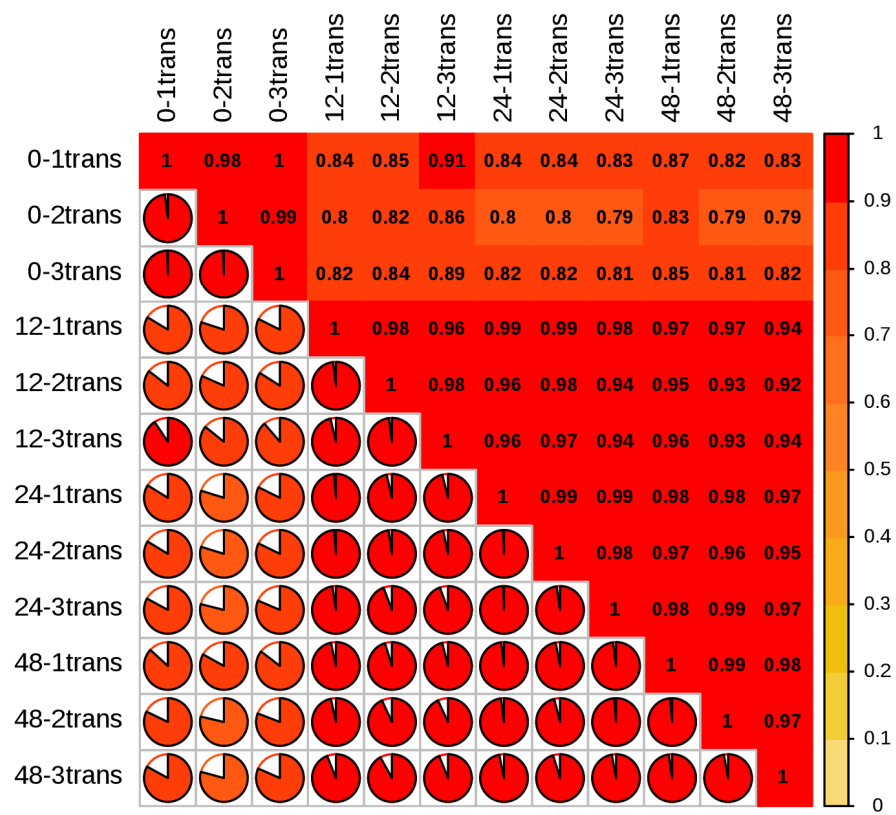

Figure. S1. Gene expression pattern correlation analysis between the biological replicate samples.
