# Supplementary material for: Small Brown Planthopper Nymph Infestation Regulates Plant Defenses by Affecting Secondary Metabolite Biosynthesis in Rice
Source: MDPI journal article supplement (doi:10.3390/ijms24054764), 2023-03-01
Supplement: s1 [file s1]

## 24-meta and 12-trans

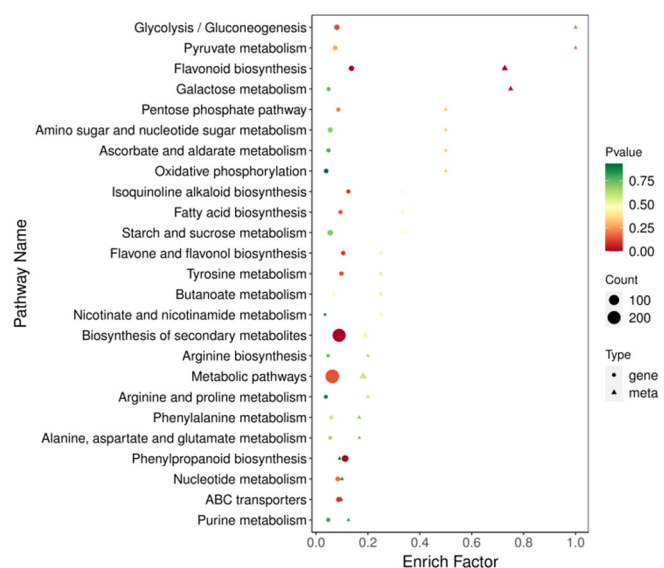

## 48-meta and 24-trans

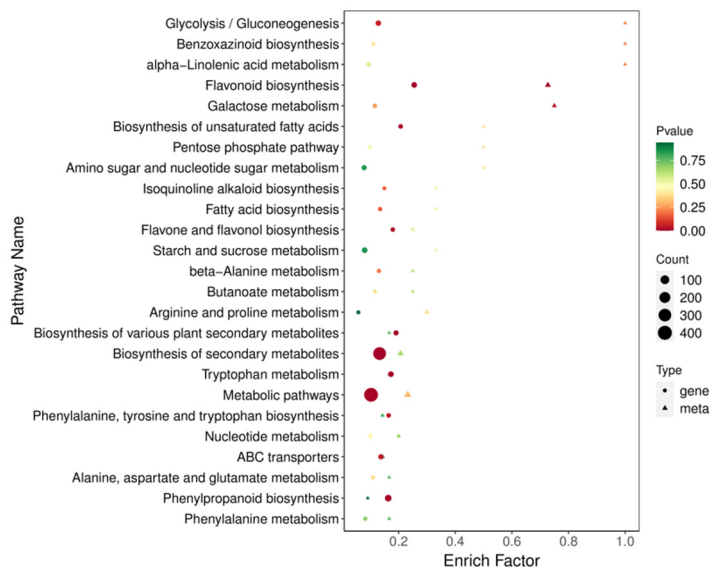

## 72-meta and 48-trans

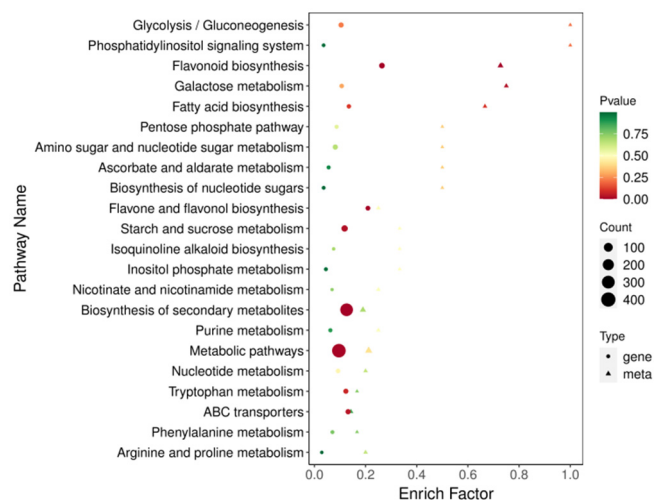

Figure S6. Statistics of Kyoto Encyclopedia of Genes and Genomes (KEGG) pathways co-enriched by transcriptome and metabolome data. Hierarchical cluster analysis (HCA) of all differentially expressed genes and differentially accumulated metabolites between the SBPH-infested (meta24-trans12, meta48-trans24 and meta72-trans48) and uninfested (meta0-trans0) groups.  $p$ -value  $\leq 0.05$  and the absolute value of Log2 FC (fold-change)  $\geq 1.0$  were used as the threshold for significant difference.
