# Supplementary material for: Small Brown Planthopper Nymph Infestation Regulates Plant Defenses by Affecting Secondary Metabolite Biosynthesis in Rice
Source: Int J Mol Sci. 2023 Mar 1;24(5):4764. doi: 10.3390/ijms24054764 (PMC10003665; doi:10.3390/ijms24054764)
Supplement: Supplementary file 1 [file ijms-24-04764-s001.zip › Supplementary Tables.xlsx]

## Sheet: Table S1
Table S1. Overview of RNA-sequencing reads from twelve rice transcriptomic libraries
1) Sample	Raw Reads	Clean Reads	Clean Base(G)	Error Rate(%)	Q20(%)	Q30(%)	GC Content(%)
0-1 trans	46962992	46889794	7.03	0.02	97.68	93.39	50.96
0-2 trans	48173328	48089852	7.21	0.02	97.53	93.1	51.39
0-3 trans	53989142	53912876	8.09	0.02	97.38	92.75	51.71
12-1 trans	47179648	47117596	7.07	0.02	97.52	93.09	52.2
12-2 trans	69313954	69246852	10.39	0.02	98.84	96.26	52.37
12-3 trans	61384358	61305830	9.2	0.02	98.76	96.07	52.29
24-1 trans	65451176	65357618	9.8	0.02	98.76	96.03	51.53
24-2 trans	62990692	62913478	9.44	0.02	98.73	96.01	52.26
24-3 trans	48703080	48636834	7.3	0.02	97.46	92.94	52.23
48-1 trans	72814416	72739136	10.91	0.02	98.77	96.11	52.58
48-2 trans	67660666	67581018	10.14	0.02	98.76	96.04	52.16
48-3 trans	68900262	68821262	10.32	0.02	98.84	96.25	52.03
Total	713523714	712612146	-	-	-	-	-
1) 0-1 trans refers to the control (uninfested) samples; 12-trans, 24-trans, and 48-trans refer to the SBPH-infested samples at different damage durations. Q20 (%): Proportion of bases with mass value ≥ 20 (sequencing error rate less than 0.01); Q30 (%): proportion of bases with mass value ≥30 (sequencing error rate less than 0.001).

## Sheet: Table S2
ID	0-1trans_fpkm	0-2trans_fpkm	0-3trans_fpkm	12-1trans_fpkm	12-2trans_fpkm	12-3trans_fpkm	24-1trans_fpkm	24-2trans_fpkm	24-3trans_fpkm	48-1trans_fpkm	48-2trans_fpkm	48-3trans_fpkm	0-1trans_count	0-2trans_count	0-3trans_count	12-1trans_count	12-2trans_count	12-3trans_count	24-1trans_count	24-2trans_count	24-3trans_count	48-1trans_count	48-2trans_count	48-3trans_count	trans12_vs_trans0.log2FoldChange	trans12_vs_trans0.pvalue	trans12_vs_trans0.padj	trans12_vs_trans0.regulated	trans24_vs_trans0.log2FoldChange	trans24_vs_trans0.pvalue	trans24_vs_trans0.padj	trans24_vs_trans0.regulated	trans48_vs_trans0.log2FoldChange	trans48_vs_trans0.pvalue	trans48_vs_trans0.padj	trans48_vs_trans0.regulated	chr	start	end	strand	gene_name	gene_description	KEGG	KEGG pathway	NR	Swissprot	Tremble	KOG	GO
Os01g0101150	0.895	0.9412	0.9181	0.4286	0.7303	0.9147	0.58625	0.8439	0.3286	0.5521	0.4401	0.2463	37	40	38.5	19	47	52	32	49	15	37	28	16	-0.374431	0.33347	0.530228	false	-0.564322	0.136963	0.225024	false	-1.09793	0.00857508	0.0267778	down	1	58658	61090	+	Os01g0101150	Hypothetical conserved gene	K23541 Ca2+/H+ antiporter, TMEM165/GDT1 family | (RefSeq) pentatricopeptide repeat-containing protein At4g21065 (A)	--	--	PP206_ARATH RecName: Full=Putative pentatricopeptide repeat-containing protein At2g01510;	Q7F2F8_ORYSJ SubName: Full=p0402A09.8 protein {ECO:0000313|EMBL:BAB62625.1}; SubName: Full=p0455C04.2 protein {ECO:0000313|EMBL:BAB92127.1};	At3g02010	GO:0043231,intracellular membrane-bounded organelle; GO:0003723,RNA binding; GO:0008270,zinc ion binding; GO:0009451,RNA modification; GO:0003674,molecular_function; GO:0003676,nucleic acid binding; GO:0005488,binding; GO:0097159,organic cyclic compound binding; GO:1901363,heterocyclic compound binding; GO:0043167,ion binding; GO:0043169,cation binding; GO:0046872,metal ion binding; GO:0046914,tr…
Os01g0104900	1.4274	1.453	1.4402	2.7547	2.2602	1.5932	3.0111	2.5051	3.5171	1.8224	2.6313	2.979	43	45	44	89	106	66	111.5	106	117	89	122	141	0.630723	0.0457673	0.13314	false	1.09673	1.58351e-05	7.55691e-05	up	0.840005	0.00613566	0.020242	false	1	270179	275084	-	Os01g0104900	Transferase family protein	K15400 omega-hydroxypalmitate O-feruloyl transferase [EC:2.3.1.188] | (RefSeq) omega-hydroxypalmitate O-feruloyl transferase (A)	ko00073: Cutin, suberine and wax biosynthesis	--	AT9_ACTCC RecName: Full=Alcohol acyltransferase 9 {ECO:0000305}; Short=AcAT9 {ECO:0000305}; EC=2.3.1.268 {ECO:0000250|UniProtKB:A0A068BIF1};	A0A0E0MQB9_ORYRU SubName: Full=Uncharacterized protein {ECO:0000313|EnsemblPlants:ORUFI01G00350.2};	At1g27620	GO:0016746,transferase activity, transferring acyl groups; GO:0016747,transferase activity, transferring acyl groups other than amino-acyl groups; GO:0006066,alcohol metabolic process; GO:0009836,fruit ripening, climacteric; GO:0009723,response to ethylene; GO:0003674,molecular_function; GO:0003824,catalytic activity; GO:0016740,transferase activity; GO:0008150,biological_process; GO:0008152,meta…
Os01g0106400	151.43	148.532	149.981	9.1463	28.5889	72.9631	10.761	10.5621	10.96	10.3256	7.0075	16.5244	3103	3129	3116	201	912	2056	276	304	248	343	221	532	-2.01246	0.00895331	0.037744	down	-3.76117	0	0	down	-3.6723	3.89095e-23	2.75868e-21	down	1	327128	328450	-	Os01g0106400	Similar to Isoflavone reductase homolog IRL (EC 1.3.1.-)	K23050 phenylcoumaran benzylic ether reductase [EC:1.3.1.-] | (RefSeq) isoflavone reductase homolog IRL (A)	--	--	IFRH_MAIZE RecName: Full=Isoflavone reductase homolog IRL; EC=1.3.1.-;	A0A0P0UXH1_ORYSJ SubName: Full=Os01g0106400 protein {ECO:0000313|EMBL:BAF03690.1}; SubName: Full=Putative isoflavone reductase {ECO:0000313|EMBL:BAB16910.1};	At1g75280	GO:0005737,cytoplasm; GO:0070402,NADPH binding; GO:0016491,oxidoreductase activity; GO:0010438,cellular response to sulfur starvation; GO:0000166,nucleotide binding; GO:0003674,molecular_function; GO:0005488,binding; GO:0036094,small molecule binding; GO:0043167,ion binding; GO:0043168,anion binding; GO:0050661,NADP binding; GO:0097159,organic cyclic compound binding; GO:1901265,nucleoside phosph…
Os01g0106600	2.6464	2.2384	2.4424	4.5061	3.3629	4.2673	3.92695	3.1129	4.741	5.2169	4.822	4.8701	46	40	43	84	91	102	83.5	76	91	147	129	133	0.745033	0.0101157	0.0414028	false	0.7161	0.0104674	0.0262633	false	1.07867	2.44291e-05	0.000161505	up	1	332667	333689	-	Os01g0106600	Similar to Chitin-binding lectin 1 precursor (PL-I)	--	--	--	--	A0A0P0UX63_ORYSJ SubName: Full=Os01g0106600 protein {ECO:0000313|EMBL:BAF03691.1};	--	--
Os01g0106900	240.655	316.418	278.536	100.912	110.867	109.599	105.625	113.523	97.7261	116.582	101.872	100.148	7765	10496	9130.5	3492	5569	4863	4313.5	5145	3482	6098	5059	5077	-1.35854	3.5733e-34	7.32935e-32	down	-1.35275	2.82726e-37	1.33806e-35	down	-1.33859	1.67323e-31	1.87314e-29	down	1	374728	380713	-	OsDXR	Similar to 1-deoxy-D-xylulose 5-phosphate reductoisomerase (Fragment)	K00099 1-deoxy-D-xylulose-5-phosphate reductoisomerase [EC:1.1.1.267] | (RefSeq) 1-deoxy-D-xylulose 5-phosphate reductoisomerase, chloroplastic (A)	ko00900: Terpenoid backbone biosynthesis; ko01100: Metabolic pathways; ko01110: Biosynthesis of secondary metabolites	--	DXR_ORYSJ RecName: Full=1-deoxy-D-xylulose 5-phosphate reductoisomerase, chloroplastic; Short=1-deoxyxylulose-5-phosphate reductoisomerase; Short=DXP reductoisomerase; EC=1.1.1.267; AltName: Full=2-C-methyl-D-erythritol 4-phosphate synthase; Flags: Precursor;	A0A0E0FF26_ORYNI RecName: Full=1-deoxy-D-xylulose-5-phosphate reductoisomerase {ECO:0000256|ARBA:ARBA00012366}; EC=1.1.1.267 {ECO:0000256|ARBA:ARBA00012366};	At5g62790	GO:0009570,chloroplast stroma; GO:0030604,1-deoxy-D-xylulose-5-phosphate reductoisomerase activity; GO:0030145,manganese ion binding; GO:0070402,NADPH binding; GO:0051484,isopentenyl diphosphate biosynthetic process, methylerythritol 4-phosphate pathway involved in terpenoid biosynthetic process; GO:0046686,response to cadmium ion; GO:0003674,molecular_function; GO:0003824,catalytic activity; GO:…
Os01g0108400	1.9821	1.0382	1.51015	2.9856	5.5336	3.9916	2.3653	2.6595	2.0711	3.0568	2.7243	1.2131	26	14	20	42	113	72	39.5	49	30	65	55	25	1.49346	0.000254552	0.00197092	up	0.707317	0.0683634	0.127532	false	0.673914	0.173834	0.295968	false	1	455707	457425	+	Os01g0108400	Helix-loop-helix DNA-binding domain containing protein	--	--	--	BH168_ARATH RecName: Full=Transcription factor bHLH168 {ECO:0000305}; AltName: Full=Basic helix-loop-helix protein 168 {ECO:0000305}; Short=AtbHLH168 {ECO:0000305}; Short=bHLH 168 {ECO:0000305}; AltName: Full=bHLH transcription factor bHLH168 {ECO:0000305};	A0A0P0UXA8_ORYSJ SubName: Full=Os01g0108400 protein {ECO:0000313|EMBL:BAS69988.1};	--	GO:0090575,RNA polymerase II transcription regulator complex; GO:0000981,DNA-binding transcription factor activity, RNA polymerase II-specific; GO:0046983,protein dimerization activity; GO:0000977,RNA polymerase II transcription regulatory region sequence-specific DNA binding; GO:0006357,regulation of transcription by RNA polymerase II; GO:0003674,molecular_function; GO:0003700,DNA-binding transc…
Os01g0108600	33.6114	29.8918	31.7516	58.1182	68.8833	62.219	63.4387	65.049	61.8284	48.9147	48.4311	55.2432	735	672	703.5	1363	2345	1871	1745.5	1998	1493	1734	1630	1898	1.01102	5.75057e-20	4.17595e-18	up	1.0425	6.13848e-31	2.18219e-29	up	0.734494	4.01644e-10	6.72194e-09	false	1	478384	481165	+	Os01g0108600	Basic helix-loop-helix dimerisation region bHLH domain containing protein	--	--	--	BH167_ARATH RecName: Full=Transcription factor bHLH167 {ECO:0000305}; AltName: Full=Basic helix-loop-helix protein 167 {ECO:0000305}; Short=AtbHLH167 {ECO:0000305}; Short=bHLH 167 {ECO:0000305}; AltName: Full=bHLH transcription factor bHLH167 {ECO:0000305};	Q8W0N9_ORYSJ SubName: Full=Os01g0108600 protein {ECO:0000313|EMBL:BAS69991.1}; SubName: Full=cDNA clone:006-308-A12, full insert sequence {ECO:0000313|EMBL:BAG98744.1};	At4g20970	GO:0005737,cytoplasm; GO:0005634,nucleus; GO:0090575,RNA polymerase II transcription regulator complex; GO:0003700,DNA-binding transcription factor activity; GO:0000981,DNA-binding transcription factor activity, RNA polymerase II-specific; GO:0046983,protein dimerization activity; GO:0000977,RNA polymerase II transcription regulatory region sequence-specific DNA binding; GO:0006357,regulation of …
Os01g0109432	7.8405	6.2399	7.0402	3.7978	3.9898	5.9977	2.7144	2.7547	2.6741	3.2662	4.1018	1.361	77	63	70	40	61	81	33.5	38	29	52	62	21	-0.592951	0.0495996	0.141317	false	-1.32404	2.32341e-06	1.27026e-05	down	-1.22763	0.00206858	0.00804229	down	1	509226	509803	-	Os01g0109432	Hypothetical gene	--	--	--	--	A0A0D9Y286_9ORYZ SubName: Full=Uncharacterized protein {ECO:0000313|EnsemblPlants:OGLUM01G00670.1};	--	--
Os01g0109500	6.4807	5.0431	5.7619	4.1181	3.7003	4.8523	2.75645	1.9481	3.5648	3.287	3.4934	3.6665	135	108	121.5	92	120	139	69.5	57	82	111	112	120	-0.430449	0.0567742	0.156256	false	-1.04233	5.83738e-05	0.000252482	down	-0.673873	0.00228857	0.00876936	false	1	510752	512142	+	Os01g0109500	Conserved hypothetical protein	--	--	--	--	A0A0E0MQF7_ORYRU SubName: Full=Uncharacterized protein {ECO:0000313|EnsemblPlants:ORUFI01G00650.1};	--	--
Os01g0110100	0.4681	0.2898	0.37895	0.4563	0.2597	0.2785	0.7786	0.8635	0.6937	0.3938	0.5253	0.623	22	14	18	23	19	18	46.5	57	36	30	38	46	-0.183194	0.724956	0.84973	false	1.08614	0.00344499	0.00993791	up	0.497915	0.278588	0.41928	false	1	537710	543354	+	Pho1	Phosphate (Pi) transporter%2C Pi homeostasi	K24195 xenotropic and polytropic retrovirus receptor 1 | (RefSeq) phosphate transporter PHO1-3 (A)	--	--	PHO11_ORYSJ RecName: Full=Phosphate transporter PHO1-1; AltName: Full=Protein PHO1-1; Short=OsPHO1;1;	A0A0E0MQG8_ORYRU SubName: Full=Uncharacterized protein {ECO:0000313|EnsemblPlants:ORUFI01G00730.1};	At1g68740	GO:0005737,cytoplasm; GO:0005794,Golgi apparatus; GO:0016021,integral component of membrane; GO:0005886,plasma membrane; GO:0000822,inositol hexakisphosphate binding; GO:0015114,phosphate ion transmembrane transporter activity; GO:0016036,cellular response to phosphate starvation; GO:0006817,phosphate ion transport; GO:0003674,molecular_function; GO:0005488,binding; GO:0036094,small molecule bind…
Os01g0110200	3.0337	0.4131	1.7234	1.5275	1.8708	6.2212	1.9763	0.8207	3.1319	10.5921	5.4009	5.7155	50	7	28.5	27	48	141	38	19	57	283	137	148	0.922699	0.154255	0.3188	false	0.219332	0.722657	0.804413	false	2.12633	4.06754e-05	0.000255966	up	1	543425	544510	-	OsAGP12	Conserved hypothetical protein	--	--	--	--	B7F2I8_ORYSJ SubName: Full=cDNA clone:002-138-H09, full insert sequence {ECO:0000313|EMBL:BAG98835.1};	--	--
Os01g0110800	1.445	1.2885	1.36675	0.2807	0.3868	1.6857	0.1997	0.2358	0.1636	0.1671	0.0391	0.2683	48	44	46	10	20	77	8.5	11	6	9	2	14	-0.782182	0.174755	0.346238	false	-2.73946	1.92018e-10	1.80659e-09	down	-3.04991	2.47266e-08	3.05131e-07	down	1	576495	579569	-	Os01g0110800	Leucine-rich repeat%2C plant specific containing protein	--	--	--	PII2_ARATH RecName: Full=Piriformospora indica-insensitive protein 2; Flags: Precursor;	Q657S8_ORYSJ SubName: Full=Os01g0110800 protein {ECO:0000313|EMBL:BAS70013.1}; SubName: Full=cDNA clone:J013002E08, full insert sequence {ECO:0000313|EMBL:BAG89409.1};	At3g25670	GO:0005886,plasma membrane; GO:0044403,biological process involved in symbiotic interaction; GO:0009610,response to symbiotic fungus; GO:0008150,biological_process; GO:0044419,biological process involved in interspecies interaction between organisms; GO:0009605,response to external stimulus; GO:0009607,response to biotic stimulus; GO:0009608,response to symbiont; GO:0009620,response to fungus; GO…
Os01g0111100	3.3661	3.4277	3.3969	7.9938	6.5542	4.4749	6.75845	6.5154	7.0015	4.3151	5.912	3.9836	64	67	65.5	163	194	117	160.5	174	147	133	173	119	0.916243	0.000867461	0.00555569	false	1.0268	2.19983e-07	1.4127e-06	up	0.528252	0.0411325	0.0968674	false	1	586445	587696	-	OsCYP26-2	Cyclophilin-like domain containing protein	K03768 peptidyl-prolyl cis-trans isomerase B (cyclophilin B) [EC:5.2.1.8] | (RefSeq) peptidyl-prolyl cis-trans isomerase CYP26-2, chloroplastic (A)	--	--	CP26B_ARATH RecName: Full=Peptidyl-prolyl cis-trans isomerase CYP26-2, chloroplastic; Short=PPIase CYP26-2; EC=5.2.1.8; AltName: Full=Cyclophilin of 26 kDa 2; AltName: Full=Cyclophilin-26-2; Flags: Precursor;	A0A5S6R758_ORYSJ RecName: Full=Peptidyl-prolyl cis-trans isomerase {ECO:0000256|RuleBase:RU363019}; Short=PPIase {ECO:0000256|RuleBase:RU363019}; EC=5.2.1.8 {ECO:0000256|RuleBase:RU363019};	At1g74070	GO:0009507,chloroplast; GO:0009534,chloroplast thylakoid; GO:0005739,mitochondrion; GO:0003755,peptidyl-prolyl cis-trans isomerase activity; GO:0003674,molecular_function; GO:0003824,catalytic activity; GO:0016853,isomerase activity; GO:0016859,cis-trans isomerase activity; GO:0140096,catalytic activity, acting on a protein; GO:0005575,cellular_component; GO:0005622,intracellular anatomical struc…
Os01g0111700	37.8661	35.924	36.895	8.4204	14.2019	15.0813	6.94495	6.1632	7.7267	17.9029	14.4866	7.9676	608	593	600.5	145	355	333	138	139	137	466	358	201	-1.52947	1.95497e-15	1.02038e-13	down	-2.37832	6.62877e-67	7.35982e-65	down	-1.40878	2.52413e-09	3.73071e-08	down	1	620572	621516	-	Os01g0111700	Conserved hypothetical protein	--	--	--	--	Q7F626_ORYSJ SubName: Full=Os01g0111700 protein {ECO:0000313|EMBL:BAF03721.1};	--	GO:0016021,integral component of membrane; GO:0005575,cellular_component; GO:0016020,membrane; GO:0031224,intrinsic component of membrane; GO:0110165,cellular anatomical entity
Os01g0111800	27.3721	25.0939	26.233	52.0236	35.221	55.8351	72.3011	57.964	86.6381	47.3101	56.7631	98.6301	313	295	304	638	627	878	1012.5	931	1094	877	999	1772	0.8822	1.60851e-06	2.21637e-05	false	1.49603	1.26055e-20	2.63903e-19	up	1.42682	1.21749e-08	1.59049e-07	up	1	624087	624759	+	Os01g0111800	Conserved hypothetical protein	--	--	--	--	A0A0E0MQI1_ORYRU SubName: Full=Uncharacterized protein {ECO:0000313|EnsemblPlants:ORUFI01G00860.1};	--	--
Os01g0111900	79.2004	59.4844	69.3424	114.096	69.1862	116.86	160.03	127.012	193.047	135.506	166.253	306.187	1378	1064	1221	2129	1874	2796	3406.5	3104	3709	3822	4452	8370	0.550472	0.0040514	0.0201727	false	1.24081	2.24233e-14	3.03298e-13	up	1.60983	9.46786e-05	0.00054148	up	1	625986	627009	+	SIP34	Glutelin family protein	--	--	--	--	A2ZNG5_ORYSJ SubName: Full=Uncharacterized protein {ECO:0000313|EMBL:EAZ10262.1};	--	--
Os01g0112100	0.7813	0.8531	0.8172	0.4014	0.8809	0.7885	0.5571	0.5222	0.592	0.3934	0.3626	0.3857	49	55	52	27	86	68	43.5	46	41	40	35	38	-0.213732	0.542865	0.7185	false	-0.511379	0.0676486	0.12645	false	-1.04895	0.000989636	0.00424464	down	1	635325	639015	-	Os01g0112100	Conserved hypothetical protein	--	--	--	--	A0A0P0UXT8_ORYSJ SubName: Full=Os01g0112100 protein {ECO:0000313|EMBL:BAF03725.1};	At1g18850	--
Os01g0112400	5.0199	3.3675	4.1937	0.269	0.1853	2.3917	0.08215	0.1643	0	1.317	0.075	0.1836	87	60	73.5	5	5	57	2	4	0	37	2	5	-2.13422	0.0443268	0.129952	false	-5.48564	2.16138e-16	3.48005e-15	down	-2.96035	2.53925e-05	0.000167449	down	1	645598	646722	-	OsNIP4	Major intrinsic protein family protein	K09874 aquaporin NIP | (RefSeq) aquaporin NIP4-1 (A)	--	--	NIP41_ORYSJ RecName: Full=Aquaporin NIP4-1; AltName: Full=NOD26-like intrinsic protein 4-1; AltName: Full=OsNIP4;1;	A0A0E0MQI7_ORYRU SubName: Full=Uncharacterized protein {ECO:0000313|EnsemblPlants:ORUFI01G00920.1};	At5g37820	GO:0016021,integral component of membrane; GO:0015267,channel activity; GO:0003674,molecular_function; GO:0005215,transporter activity; GO:0022803,passive transmembrane transporter activity; GO:0022857,transmembrane transporter activity; GO:0005575,cellular_component; GO:0016020,membrane; GO:0031224,intrinsic component of membrane; GO:0110165,cellular anatomical entity
Os01g0113800	3.9743	5.2022	4.58825	1.281	1.8753	2.123	1.44855	1.7641	1.133	2.4214	1.6099	1.0774	162	218	190	56	119	119	76	101	51	160	101	69	-1.35595	5.61462e-09	1.24916e-07	down	-1.60251	2.60208e-14	3.48536e-13	down	-1.38246	9.41661e-07	8.45111e-06	down	1	745452	748945	+	Os01g0113800	Protein kinase%2C core domain containing protein	K13430 serine/threonine-protein kinase PBS1 [EC:2.7.11.1] | (RefSeq) serine/threonine-protein kinase PBS1 (A)	ko04626: Plant-pathogen interaction	--	LRK10_WHEAT RecName: Full=Rust resistance kinase Lr10 {ECO:0000312|EMBL:AAC49629.1}; EC=2.7.11.1; AltName: Full=Probable receptor-like serine/threonine-protein kinase LRK10; Flags: Precursor;	Q9ARM8_ORYSJ SubName: Full=Os01g0113800 protein {ECO:0000313|EMBL:BAS70049.1}; SubName: Full=cDNA clone:J023005G06, full insert sequence {ECO:0000313|EMBL:BAG99372.1};	At5g38260	GO:0016021,integral component of membrane; GO:0005886,plasma membrane; GO:0005524,ATP binding; GO:0106310,protein serine kinase activity; GO:0106311,protein threonine kinase activity; GO:0000166,nucleotide binding; GO:0003674,molecular_function; GO:0005488,binding; GO:0017076,purine nucleotide binding; GO:0030554,adenyl nucleotide binding; GO:0032553,ribonucleotide binding; GO:0032555,purine ribo…
Os01g0115600	24.7869	33.709	29.2479	13.3634	28.184	23.5135	12.2207	13.2979	11.1435	18.207	16.2004	12.9725	844	1180	1012	488	1494	1101	527.5	636	419	1005	849	694	-0.413391	0.0610275	0.164439	false	-1.21094	7.51471e-21	1.59897e-19	down	-0.838394	6.51084e-08	7.42368e-07	false	1	843530	847399	+	OsRLCK11	Similar to LRK14	K13418 somatic embryogenesis receptor kinase 1 [EC:2.7.10.1 2.7.11.1] | (RefSeq) somatic embryogenesis receptor kinase 1 (A)	--	--	LRK10_WHEAT RecName: Full=Rust resistance kinase Lr10 {ECO:0000312|EMBL:AAC49629.1}; EC=2.7.11.1; AltName: Full=Probable receptor-like serine/threonine-protein kinase LRK10; Flags: Precursor;	Q7F3W0_ORYSJ SubName: Full=Os01g0115600 protein {ECO:0000313|EMBL:BAF03750.1}; SubName: Full=Putative receptor serine/threonine kinase PR5K {ECO:0000313|EMBL:BAB39451.1};	At5g38280	GO:0016021,integral component of membrane; GO:0005886,plasma membrane; GO:0005524,ATP binding; GO:0106310,protein serine kinase activity; GO:0106311,protein threonine kinase activity; GO:0000166,nucleotide binding; GO:0003674,molecular_function; GO:0005488,binding; GO:0017076,purine nucleotide binding; GO:0030554,adenyl nucleotide binding; GO:0032553,ribonucleotide binding; GO:0032555,purine ribo…
Os01g0116400	0.4398	0.453	0.4464	0.2412	0.3324	0.1693	0.15815	0.1289	0.1874	0.3351	0.2017	0.0329	17	18	17.5	10	20	9	7.5	7	8	21	12	2	-0.835967	0.135324	0.291343	false	-1.45761	0.00785574	0.0205123	down	-1.20422	0.0982923	0.191629	false	1	921078	923630	-	Os01g0116400	Protein kinase%2C core domain containing protein	K13418 somatic embryogenesis receptor kinase 1 [EC:2.7.10.1 2.7.11.1] | (RefSeq) somatic embryogenesis receptor kinase 1 (A)	--	--	LRK10_WHEAT RecName: Full=Rust resistance kinase Lr10 {ECO:0000312|EMBL:AAC49629.1}; EC=2.7.11.1; AltName: Full=Probable receptor-like serine/threonine-protein kinase LRK10; Flags: Precursor;	Q0JR71_ORYSJ SubName: Full=Os01g0116400 protein {ECO:0000313|EMBL:BAF03757.1}; SubName: Full=Putative rust resistance kinase Lr10 {ECO:0000313|EMBL:BAD52508.1};	At1g66910	GO:0016021,integral component of membrane; GO:0005886,plasma membrane; GO:0005524,ATP binding; GO:0106310,protein serine kinase activity; GO:0106311,protein threonine kinase activity; GO:0000166,nucleotide binding; GO:0003674,molecular_function; GO:0005488,binding; GO:0017076,purine nucleotide binding; GO:0030554,adenyl nucleotide binding; GO:0032553,ribonucleotide binding; GO:0032555,purine ribo…
Os01g0116901	1.6558	2.4583	2.05705	0.7043	1.8287	1.1407	0.71605	0.5377	0.8944	0.8601	0.9249	1.0724	57	87	72	26	98	54	30	26	34	48	49	58	-0.717808	0.0510063	0.144336	false	-1.50492	1.73179e-06	9.67347e-06	down	-1.05635	0.000461409	0.00217215	down	1	935618	938250	+	Os01g0116901	Hypothetical protein	K13430 serine/threonine-protein kinase PBS1 [EC:2.7.11.1] | (RefSeq) serine/threonine-protein kinase CDL1 isoform X1 (A)	ko04626: Plant-pathogen interaction	--	LRK10_WHEAT RecName: Full=Rust resistance kinase Lr10 {ECO:0000312|EMBL:AAC49629.1}; EC=2.7.11.1; AltName: Full=Probable receptor-like serine/threonine-protein kinase LRK10; Flags: Precursor;	Q5ZE79_ORYSJ SubName: Full=Putative rust resistance kinase Lr10 {ECO:0000313|EMBL:BAD52512.1};	At1g66980_2	GO:0016021,integral component of membrane; GO:0005886,plasma membrane; GO:0005524,ATP binding; GO:0106310,protein serine kinase activity; GO:0106311,protein threonine kinase activity; GO:0000166,nucleotide binding; GO:0003674,molecular_function; GO:0005488,binding; GO:0017076,purine nucleotide binding; GO:0030554,adenyl nucleotide binding; GO:0032553,ribonucleotide binding; GO:0032555,purine ribo…
Os01g0117000	0.4236	0.6438	0.5337	0.1234	0.3061	0.077	0.15845	0.245	0.0719	0.2123	0.1892	0.0506	16	25	20.5	5	18	4	8	13	3	13	11	3	-1.60362	0.0143786	0.0545892	false	-1.64431	0.00392549	0.01117	down	-1.76616	0.00601325	0.0198914	down	1	957907	960626	-	OsRLCK15	Similar to Receptor-like kinase ARK1AS	K13418 somatic embryogenesis receptor kinase 1 [EC:2.7.10.1 2.7.11.1] | (RefSeq) somatic embryogenesis receptor kinase 1 (A)	--	--	LRK10_WHEAT RecName: Full=Rust resistance kinase Lr10 {ECO:0000312|EMBL:AAC49629.1}; EC=2.7.11.1; AltName: Full=Probable receptor-like serine/threonine-protein kinase LRK10; Flags: Precursor;	A0A0P0UX91_ORYSJ SubName: Full=Os01g0117000 protein {ECO:0000313|EMBL:BAS70092.1};	At1g66910	GO:0016021,integral component of membrane; GO:0005886,plasma membrane; GO:0005524,ATP binding; GO:0106310,protein serine kinase activity; GO:0106311,protein threonine kinase activity; GO:0000166,nucleotide binding; GO:0003674,molecular_function; GO:0005488,binding; GO:0017076,purine nucleotide binding; GO:0030554,adenyl nucleotide binding; GO:0032553,ribonucleotide binding; GO:0032555,purine ribo…
Os01g0117100	20.8217	20.1364	20.4791	2.8056	5.9272	11.7572	4.4147	6.1409	2.6885	5.395	2.8673	3.2684	519	516	517.5	75	230	403	144.5	215	74	218	110	128	-1.57026	0.00393998	0.0197701	down	-2.14806	1.536e-23	3.78568e-22	down	-2.36368	7.31022e-28	6.98111e-26	down	1	961799	965151	+	Os01g0117100	Similar to Receptor kinase LRK10	K00924 kinase [EC:2.7.1.-] | (RefSeq) receptor protein kinase TMK1 (A)	--	--	LRK10_WHEAT RecName: Full=Rust resistance kinase Lr10 {ECO:0000312|EMBL:AAC49629.1}; EC=2.7.11.1; AltName: Full=Probable receptor-like serine/threonine-protein kinase LRK10; Flags: Precursor;	A0A0P0UXZ7_ORYSJ SubName: Full=Os01g0117100 protein {ECO:0000313|EMBL:BAS70094.1}; Flags: Fragment;	At5g38280	GO:0016021,integral component of membrane; GO:0005886,plasma membrane; GO:0005524,ATP binding; GO:0106310,protein serine kinase activity; GO:0106311,protein threonine kinase activity; GO:0000166,nucleotide binding; GO:0003674,molecular_function; GO:0005488,binding; GO:0017076,purine nucleotide binding; GO:0030554,adenyl nucleotide binding; GO:0032553,ribonucleotide binding; GO:0032555,purine ribo…
Os01g0117200	0.9553	0.807	0.88115	0.2579	0.436	0.6764	0.0179	0.0358	0	0.8219	0.2777	0.064	38	33	35.5	11	27	37	1	2	0	53	17	4	-0.923752	0.0375931	0.115165	false	-5.43479	4.2535e-09	3.42547e-08	down	-1.1532	0.0922357	0.182622	false	1	969340	973327	-	OsRLCK16	Similar to ARK protein (Fragment)	K13418 somatic embryogenesis receptor kinase 1 [EC:2.7.10.1 2.7.11.1] | (RefSeq) somatic embryogenesis receptor kinase 1 (A)	--	--	LRK10_WHEAT RecName: Full=Rust resistance kinase Lr10 {ECO:0000312|EMBL:AAC49629.1}; EC=2.7.11.1; AltName: Full=Probable receptor-like serine/threonine-protein kinase LRK10; Flags: Precursor;	Q5ZE77_ORYSJ SubName: Full=Os01g0117200 protein {ECO:0000313|EMBL:BAS70095.1}; SubName: Full=cDNA clone:J013020P18, full insert sequence {ECO:0000313|EMBL:BAG99869.1};	At1g66910	GO:0016021,integral component of membrane; GO:0005886,plasma membrane; GO:0005524,ATP binding; GO:0106310,protein serine kinase activity; GO:0106311,protein threonine kinase activity; GO:0000166,nucleotide binding; GO:0003674,molecular_function; GO:0005488,binding; GO:0017076,purine nucleotide binding; GO:0030554,adenyl nucleotide binding; GO:0032553,ribonucleotide binding; GO:0032555,purine ribo…
Os01g0117300	0.8992	1.2683	1.08375	0.3773	0.3755	0.5231	0.11345	0.064	0.1629	0.3883	0.555	0.1431	20	29	24.5	9	13	16	3	2	4	14	19	5	-1.31924	0.00944562	0.0392415	down	-3.26602	8.10206e-07	4.78344e-06	down	-1.52507	0.00886375	0.0275705	down	1	979238	980546	+	OsRLCK17	Similar to Receptor kinase LRK10	K00924 kinase [EC:2.7.1.-] | (RefSeq) receptor protein kinase TMK1 (A)	--	--	LRK10_WHEAT RecName: Full=Rust resistance kinase Lr10 {ECO:0000312|EMBL:AAC49629.1}; EC=2.7.11.1; AltName: Full=Probable receptor-like serine/threonine-protein kinase LRK10; Flags: Precursor;	A0A0N7KC83_ORYSJ SubName: Full=Os01g0117300 protein {ECO:0000313|EMBL:BAS70097.1}; Flags: Fragment;	At5g38280	GO:0016021,integral component of membrane; GO:0005886,plasma membrane; GO:0005524,ATP binding; GO:0106310,protein serine kinase activity; GO:0106311,protein threonine kinase activity; GO:0000166,nucleotide binding; GO:0003674,molecular_function; GO:0005488,binding; GO:0017076,purine nucleotide binding; GO:0030554,adenyl nucleotide binding; GO:0032553,ribonucleotide binding; GO:0032555,purine ribo…
Os01g0117700	1.8582	1.8372	1.8477	0.6817	0.8023	0.8861	0.7707	0.8241	0.7173	1.0335	0.7917	1.1439	61	62	61.5	24	41	40	32	38	26	55	40	59	-1.20416	0.00012758	0.00108323	down	-1.21659	2.12842e-05	9.94666e-05	down	-0.8492	0.00504213	0.0171271	false	1	997918	1000997	+	Os01g0117700	Similar to LRK14	K13430 serine/threonine-protein kinase PBS1 [EC:2.7.11.1] | (RefSeq) serine/threonine-protein kinase PBS1 (A)	ko04626: Plant-pathogen interaction	--	LRK10_WHEAT RecName: Full=Rust resistance kinase Lr10 {ECO:0000312|EMBL:AAC49629.1}; EC=2.7.11.1; AltName: Full=Probable receptor-like serine/threonine-protein kinase LRK10; Flags: Precursor;	A0A0P0UXE2_ORYSJ SubName: Full=Os01g0117700 protein {ECO:0000313|EMBL:BAS70103.1};	At5g38280	GO:0016021,integral component of membrane; GO:0005886,plasma membrane; GO:0005524,ATP binding; GO:0106310,protein serine kinase activity; GO:0106311,protein threonine kinase activity; GO:0000166,nucleotide binding; GO:0003674,molecular_function; GO:0005488,binding; GO:0017076,purine nucleotide binding; GO:0030554,adenyl nucleotide binding; GO:0032553,ribonucleotide binding; GO:0032555,purine ribo…
Os01g0118300	1.3454	0.8399	1.09265	0.0936	0.1806	1.1828	0.176	0.0429	0.3091	0.2725	0.3523	0.2684	67	43	55	5	14	81	10	3	17	22	27	21	-1.1529	0.0908137	0.219619	false	-2.66756	1.23594e-07	8.21868e-07	down	-1.82318	1.66294e-06	1.41741e-05	down	1	1046604	1053166	+	SUI1	Similar to Phosphatidyl serine synthase	K08730 phosphatidylserine synthase 2 [EC:2.7.8.29] | (RefSeq) CDP-diacylglycerol--serine O-phosphatidyltransferase 1 isoform X4 (A)	ko00564: Glycerophospholipid metabolism; ko01100: Metabolic pathways; ko01110: Biosynthesis of secondary metabolites	--	PSS1_ORYSJ RecName: Full=CDP-diacylglycerol--serine O-phosphatidyltransferase 1; EC=2.7.8.8; AltName: Full=Phosphatidylserine synthase 1;	I1NJR9_ORYGL SubName: Full=Uncharacterized protein {ECO:0000313|EnsemblPlants:ORGLA01G0010900.1};	At1g15110	GO:0005789,endoplasmic reticulum membrane; GO:0016021,integral component of membrane; GO:0003882,CDP-diacylglycerol-serine O-phosphatidyltransferase activity; GO:0106245,L-serine-phosphatidylethanolamine phosphatidyltransferase activity; GO:0006646,phosphatidylethanolamine biosynthetic process; GO:0006659,phosphatidylserine biosynthetic process; GO:0003674,molecular_function; GO:0003824,catalytic…
Os01g0118600	3.497	3.0954	3.2962	3.6846	2.089	5.7726	5.3305	4.2324	6.4286	7.1187	5.2032	10.2385	100	91	95.5	113	93	227	186.5	170	203	330	229	460	0.238675	0.473419	0.661871	false	0.719559	0.000801982	0.00272804	false	1.2459	4.2425e-06	3.31315e-05	up	1	1066678	1069673	-	Os01g0118600	Similar to Hga5 protein	--	--	--	XAX1_ORYSJ RecName: Full=Beta-1,2-xylosyltransferease XAX1 {ECO:0000305}; EC=2.4.2.- {ECO:0000269|PubMed:23027943}; AltName: Full=Protein XYLOSYL ARABINOSYL SUBSTITUTION OF XYLAN 1 {ECO:0000303|PubMed:23027943};	A0A0P0UXH7_ORYSJ SubName: Full=Os01g0118600 protein {ECO:0000313|EMBL:BAF03775.2};	At3g18170	GO:0000139,Golgi membrane; GO:0016021,integral component of membrane; GO:0016757,transferase activity, transferring glycosyl groups; GO:0035252,UDP-xylosyltransferase activity; GO:0009664,plant-type cell wall organization; GO:0003674,molecular_function; GO:0003824,catalytic activity; GO:0016740,transferase activity; GO:0008194,UDP-glycosyltransferase activity; GO:0016763,transferase activity, tra…
Os01g0119000	3.0232	3.548	3.2856	4.7187	2.4697	4.9704	7.97605	6.3401	9.612	8.2705	8.7966	20.518	92	111	101.5	154	117	208	297	271	323	408	412	981	0.316965	0.266567	0.458555	false	1.30776	1.00494e-10	9.77689e-10	up	1.99291	1.64932e-09	2.51888e-08	up	1	1078565	1081597	-	Os01g0119000	Glycosyltransferase AER61%2C uncharacterized domain containing protein	--	--	--	XYXT1_ORYSJ RecName: Full=Beta-1,2-xylosyltransferase XYXT1 {ECO:0000305}; EC=2.4.2.- {ECO:0000269|PubMed:29325159}; AltName: Full=Xylan xylosyltransferase 1 {ECO:0000303|PubMed:29325159};	Q9FTE0_ORYSJ SubName: Full=Os01g0119000 protein {ECO:0000313|EMBL:BAS70114.1}; SubName: Full=cDNA clone:001-205-C08, full insert sequence {ECO:0000313|EMBL:BAG97458.1};	At3g18170	GO:0000139,Golgi membrane; GO:0016021,integral component of membrane; GO:0016757,transferase activity, transferring glycosyl groups; GO:0035252,UDP-xylosyltransferase activity; GO:0009664,plant-type cell wall organization; GO:0003674,molecular_function; GO:0003824,catalytic activity; GO:0016740,transferase activity; GO:0008194,UDP-glycosyltransferase activity; GO:0016763,transferase activity, tra…
Os01g0119050	9.7441	3.6017	6.6729	9.0857	9.8894	18.7066	16.6382	16.5106	16.7658	30.5348	21.9056	49.367	50	19	34.5	50	79	132	107	119	95	254	173	398	0.941274	0.028016	0.0915965	false	1.36999	1.87543e-05	8.83307e-05	up	2.41451	1.03282e-09	1.61963e-08	up	1	1089873	1090174	-	Os01g0119050	Non-protein coding transcript	--	--	--	--	--	--	--
Os01g0119100	19.5844	12.3284	15.9564	10.9692	10.6963	25.4437	23.0153	23.0143	23.0162	41.7115	25.537	58.6993	581	376	478.5	349	494	1038	856.5	959	754	2006	1166	2736	-0.00570228	0.989962	0.99525	false	0.571663	0.00027933	0.00105173	false	1.45415	0.000229056	0.00118371	up	1	1090194	1092825	-	Os01g0119100	Similar to Glycosyltransferase	--	--	--	XAT3_ORYSJ RecName: Full=Alpha-1,3-arabinosyltransferase XAT3 {ECO:0000305}; EC=2.4.2.- {ECO:0000269|PubMed:22215597}; AltName: Full=Xylan arabinosyltransferase 3 {ECO:0000303|PubMed:22215597}; Short=OsXAT3 {ECO:0000303|PubMed:22215597};	A0A0P0UXB1_ORYSJ SubName: Full=Os01g0119100 protein {ECO:0000313|EMBL:BAS70115.1};	At3g18170	GO:0000139,Golgi membrane; GO:0016021,integral component of membrane; GO:0052636,arabinosyltransferase activity; GO:0016757,transferase activity, transferring glycosyl groups; GO:0009664,plant-type cell wall organization; GO:0003674,molecular_function; GO:0003824,catalytic activity; GO:0016740,transferase activity; GO:0016763,transferase activity, transferring pentosyl groups; GO:0008150,biologic…
Os01g0121200	2.8566	3.1873	3.02195	1.2534	1.3492	1.558	1.18375	1.2262	1.1413	1.5807	0.928	1.2032	68	78	73	32	50	51	35.5	41	30	61	34	45	-1.10122	0.000125124	0.00106585	down	-1.30028	1.24787e-06	7.12566e-06	down	-1.23507	6.11427e-05	0.000367092	down	1	1186667	1191013	-	Os01g0121200	Zinc finger%2C RING/FYVE/PHD-type domain containing protein	K10661 E3 ubiquitin-protein ligase MARCH6 [EC:2.3.2.27] | (RefSeq) probable E3 ubiquitin ligase SUD1 (A)	ko04141: Protein processing in endoplasmic reticulum	--	SUD1_ARATH RecName: Full=Probable E3 ubiquitin ligase SUD1; EC=2.3.2.27; AltName: Full=Protein ECERIFERUM 9; AltName: Full=Protein SUPPRESSOR OF DRY2 DEFFECTS 1; Short=AtSUD1; AltName: Full=RING-type E3 ubiquitin transferase SUD1 {ECO:0000305}; AltName: Full=RING/U-box domain-containing protein;	A0A0P0UY93_ORYSJ SubName: Full=Os01g0121200 protein {ECO:0000313|EMBL:BAF03788.1};	At5g38070	GO:0030176,integral component of endoplasmic reticulum membrane; GO:0004842,ubiquitin-protein transferase activity; GO:0008270,zinc ion binding; GO:0042335,cuticle development; GO:0010143,cutin biosynthetic process; GO:0008299,isoprenoid biosynthetic process; GO:1900490,positive regulation of hydroxymethylglutaryl-CoA reductase (NADPH) activity; GO:0009414,response to water deprivation; GO:001034…
Os01g0123900	2.8124	5.538	4.1752	7.7391	15.9063	10.4253	3.069	2.7836	3.3544	2.2426	4.2786	2.4449	41	83	62	121	361	209	55.5	57	54	53	96	56	1.46373	4.63142e-06	5.76965e-05	up	-0.405939	0.179749	0.280489	false	-0.429783	0.25827	0.396364	false	1	1338241	1339098	-	RBBI2-2	Similar to Bowman-Birk type proteinase inhibitor (EBI)	--	--	--	IBBR_ORYSI RecName: Full=Bowman-Birk type bran trypsin inhibitor; AltName: Full=OSE727A; AltName: Full=Protein RBBI3-3; AltName: Full=RBTI; Flags: Precursor;	Q0JR29_ORYSJ SubName: Full=Os01g0123900 protein {ECO:0000313|EMBL:BAS70154.1}; SubName: Full=cDNA clone:001-025-D04, full insert sequence {ECO:0000313|EMBL:BAG96878.1}; SubName: Full=cDNA clone:006-203-G05, full insert sequence {ECO:0000313|EMBL:BAG96657.1}; SubName: Full=cDNA clone:J023053A08, full insert sequence {ECO:0000313|EMBL:BAG91972.1};	--	GO:0005576,extracellular region; GO:0004867,serine-type endopeptidase inhibitor activity; GO:0003674,molecular_function; GO:0004857,enzyme inhibitor activity; GO:0004866,endopeptidase inhibitor activity; GO:0030234,enzyme regulator activity; GO:0030414,peptidase inhibitor activity; GO:0061134,peptidase regulator activity; GO:0061135,endopeptidase regulator activity; GO:0098772,molecular function …
Os01g0124000	0.0647	0.1258	0.09525	0.784	3.822	1.505	0.19245	0.0921	0.2928	0.2394	0.084	0.2058	1	2	1.5	13	92	32	3.5	2	5	6	2	5	4.28721	2.32202e-06	3.10617e-05	up	NA	NA	NA	NA	NA	NA	NA	NA	1	1341368	1342277	-	RBBI2-1	Similar to Bowman Birk trypsin inhibitor	--	--	--	IBBR_ORYSI RecName: Full=Bowman-Birk type bran trypsin inhibitor; AltName: Full=OSE727A; AltName: Full=Protein RBBI3-3; AltName: Full=RBTI; Flags: Precursor;	Q5ZCB1_ORYSJ SubName: Full=Os01g0124000 protein {ECO:0000313|EMBL:BAS70155.1}; SubName: Full=cDNA clone:J013042O18, full insert sequence {ECO:0000313|EMBL:BAG89703.1};	--	GO:0005576,extracellular region; GO:0004867,serine-type endopeptidase inhibitor activity; GO:0003674,molecular_function; GO:0004857,enzyme inhibitor activity; GO:0004866,endopeptidase inhibitor activity; GO:0030234,enzyme regulator activity; GO:0030414,peptidase inhibitor activity; GO:0061134,peptidase regulator activity; GO:0061135,endopeptidase regulator activity; GO:0098772,molecular function …
Os01g0127600	0.1341	0	0.06705	2.1251	6.5018	2.2423	0.96935	0.9067	1.032	0.4135	0.2613	0.4693	2	0	1	34	151	46	18	19	17	10	6	11	5.79704	4.8348e-09	1.08495e-07	up	NA	NA	NA	NA	NA	NA	NA	NA	1	1515837	1516714	+	Os01g0127600	Similar to Bowman-Birk type proteinase inhibitor D-II precursor (IV)	--	--	--	IBBR_ORYSI RecName: Full=Bowman-Birk type bran trypsin inhibitor; AltName: Full=OSE727A; AltName: Full=Protein RBBI3-3; AltName: Full=RBTI; Flags: Precursor;	Q9FTR9_ORYSJ SubName: Full=Os01g0127600 protein {ECO:0000313|EMBL:BAS70187.1}; SubName: Full=cDNA clone:001-125-D07, full insert sequence {ECO:0000313|EMBL:BAG97258.1}; SubName: Full=cDNA clone:J033085I16, full insert sequence {ECO:0000313|EMBL:BAG95407.1};	--	GO:0005576,extracellular region; GO:0004867,serine-type endopeptidase inhibitor activity; GO:0003674,molecular_function; GO:0004857,enzyme inhibitor activity; GO:0004866,endopeptidase inhibitor activity; GO:0030234,enzyme regulator activity; GO:0030414,peptidase inhibitor activity; GO:0061134,peptidase regulator activity; GO:0061135,endopeptidase regulator activity; GO:0098772,molecular function …
Os01g0128000	4.4411	8.2042	6.32265	5.1154	1.9178	1.764	1.72775	1.8333	1.6222	2.8547	5.3104	1.4252	119	226	172.5	147	80	65	58.5	69	48	124	219	60	-1.08959	0.00478684	0.0230455	down	-1.82778	4.30102e-13	5.23428e-12	down	-0.934061	0.0201014	0.0542271	false	1	1549241	1551011	-	Os01g0128000	Myb transcription factor domain containing protein	K09422 transcription factor MYB, plant | (RefSeq) transcription factor MYB108 isoform X1 (A)	--	--	MYB62_ARATH RecName: Full=Transcription factor MYB62 {ECO:0000303|PubMed:9839469}; AltName: Full=Myb-related protein 62 {ECO:0000303|PubMed:9839469}; Short=AtMYB62 {ECO:0000303|PubMed:9839469};	A0A0P0UXR6_ORYSJ SubName: Full=Os01g0128000 protein {ECO:0000313|EMBL:BAF03822.1};	At1g68320	GO:0005634,nucleus; GO:0003700,DNA-binding transcription factor activity; GO:0043565,sequence-specific DNA binding; GO:0016036,cellular response to phosphate starvation; GO:0009740,gibberellic acid mediated signaling pathway; GO:0009686,gibberellin biosynthetic process; GO:0010373,negative regulation of gibberellin biosynthetic process; GO:0045892,negative regulation of transcription, DNA-templat…
Os01g0128200	14.782	16.065	15.4235	31.4376	21.7452	17.617	21.94	19.5863	24.2937	27.3274	42.0045	22.3305	324	362	343	739	742	531	595.5	603	588	971	1417	769	0.635723	0.00197532	0.0111696	false	0.544932	2.97923e-05	0.000135962	false	1.03776	1.15597e-06	1.01907e-05	up	1	1566147	1569467	+	Os01g0128200	Similar to Nuclease I	K05986 nuclease S1 [EC:3.1.30.1] | (RefSeq) endonuclease 2 (A)	--	--	ENDO4_ARATH RecName: Full=Endonuclease 4 {ECO:0000303|PubMed:17651368}; Short=AtENDO4 {ECO:0000303|PubMed:17651368}; EC=3.1.30.1 {ECO:0000269|PubMed:23620482}; AltName: Full=Deoxyribonuclease ENDO4 {ECO:0000303|PubMed:17651368}; AltName: Full=Single-stranded-nucleate endonuclease ENDO4 {ECO:0000303|PubMed:17651368}; Flags: Precursor;	A0A0N7KC95_ORYSJ RecName: Full=Aspergillus nuclease S(1) {ECO:0000256|ARBA:ARBA00012562}; EC=3.1.30.1 {ECO:0000256|ARBA:ARBA00012562};	At1g68290	GO:0004519,endonuclease activity; GO:0004521,endoribonuclease activity; GO:0046872,metal ion binding; GO:0003676,nucleic acid binding; GO:0000014,single-stranded DNA endodeoxyribonuclease activity; GO:0006308,DNA catabolic process; GO:0090502,RNA phosphodiester bond hydrolysis, endonucleolytic; GO:0003674,molecular_function; GO:0003824,catalytic activity; GO:0004518,nuclease activity; GO:0016787,…
Os01g0129500	1.6867	1.666	1.67635	3.944	2.5337	2.623	3.48385	2.8082	4.1595	2.3531	3.0686	2.4279	65	66	65.5	163	152	139	164.5	152	177	147	182	147	0.868807	0.00106206	0.00659605	false	1.08027	1.97517e-06	1.09288e-05	up	0.691964	0.00374734	0.0133196	false	1	1641272	1644151	-	Os01g0129500	Protein of unknown function DUF1666 family protein	--	--	--	--	Q9LG94_ORYSJ SubName: Full=Os01g0129500 protein {ECO:0000313|EMBL:BAS70201.1}; SubName: Full=cDNA clone:J033016J24, full insert sequence {ECO:0000313|EMBL:BAG94068.1};	At1g73850	GO:0016021,integral component of membrane; GO:0005575,cellular_component; GO:0016020,membrane; GO:0031224,intrinsic component of membrane; GO:0110165,cellular anatomical entity
Os01g0130900	3.9188	5.8589	4.88885	9.2703	6.2465	8.338	8.5711	6.5616	10.5806	6.4463	9.2888	13.2563	54	83	68.5	137	134	158	144	127	161	144	197	287	0.720907	0.00707982	0.0312885	false	0.840817	0.00101944	0.0033699	false	1.04682	0.000951415	0.00410554	up	1	1712137	1712947	-	Os01g0130900	Conserved hypothetical protein	--	--	--	--	A2ZNW3_ORYSJ SubName: Full=Os01g0130900 protein {ECO:0000313|EMBL:BAF03838.1};	--	--
Os01g0134700	20.0464	23.9278	21.9871	7.155	10.3769	12.5752	8.189	5.3062	11.0718	10.69	10.8779	7.7583	546	670	608	209	440	471	268	203	333	472	456	332	-1.11036	3.17876e-09	7.34477e-08	down	-1.40092	1.75093e-10	1.654e-09	down	-1.11864	8.91934e-13	2.19669e-11	down	1	1902741	1904902	+	Os01g0134700	Calmodulin binding protein-like family protein	--	--	--	SARD1_ARATH RecName: Full=Protein SAR DEFICIENT 1 {ECO:0000303|PubMed:20921422};	Q943R3_ORYSJ SubName: Full=Os01g0134700 protein {ECO:0000313|EMBL:BAS70251.1}; SubName: Full=cDNA clone:002-183-A08, full insert sequence {ECO:0000313|EMBL:BAG99259.1};	At1g73800	GO:0005634,nucleus; GO:0003700,DNA-binding transcription factor activity; GO:0043565,sequence-specific DNA binding; GO:0071219,cellular response to molecule of bacterial origin; GO:0042742,defense response to bacterium; GO:0002229,defense response to oomycetes; GO:0009626,plant-type hypersensitive response; GO:1900426,positive regulation of defense response to bacterium; GO:0080142,regulation of …
Os01g0134800	1.4974	0.0405	0.76895	0	0.0802	0.5747	0	0	0	0	0	0	36	1	18.5	0	3	19	0	0	0	0	0	0	-1.77978	0.129893	0.282765	false	-6.91629	0.00234783	0.00709895	down	-7.2429	7.88561e-06	5.82415e-05	down	1	1906717	1908131	-	Os01g0134800	Similar to (1%2C4)-beta-xylan endohydrolase%2C isoenzyme X-II (EC 3.2.1.8) (Fragment)	--	--	--	XYN3_ARATH RecName: Full=Endo-1,4-beta-xylanase 3 {ECO:0000303|PubMed:12154138}; Short=AtXyn3 {ECO:0000303|PubMed:12154138}; Short=Xylan endohydrolase 3 {ECO:0000303|PubMed:12154138}; Short=Xylanase 3 {ECO:0000303|PubMed:12154138}; EC=3.2.1.8 {ECO:0000255|PROSITE-ProRule:PRU01096};	A0A0P0UXN4_ORYSJ SubName: Full=Os01g0134800 protein {ECO:0000313|EMBL:BAF03860.1}; Flags: Fragment;	At4g08160	GO:0031176,endo-1,4-beta-xylanase activity; GO:0045493,xylan catabolic process; GO:0003674,molecular_function; GO:0003824,catalytic activity; GO:0004553,hydrolase activity, hydrolyzing O-glycosyl compounds; GO:0016787,hydrolase activity; GO:0016798,hydrolase activity, acting on glycosyl bonds; GO:0097599,xylanase activity; GO:0000272,polysaccharide catabolic process; GO:0005975,carbohydrate metab…
Os01g0134850	2.4508	0.0351	1.24295	0	0.1389	1.9132	0	0	0	0	0	0.0459	68	1	34.5	0	6	73	0	0	0	0	0	2	-0.845476	0.691237	0.827269	false	-7.82207	0.00140449	0.00448946	down	-6.26789	0.00275029	0.0102695	down	1	1906985	1909022	+	Os01g0134850	Hypothetical protein	--	--	--	XYN3_ARATH RecName: Full=Endo-1,4-beta-xylanase 3 {ECO:0000303|PubMed:12154138}; Short=AtXyn3 {ECO:0000303|PubMed:12154138}; Short=Xylan endohydrolase 3 {ECO:0000303|PubMed:12154138}; Short=Xylanase 3 {ECO:0000303|PubMed:12154138}; EC=3.2.1.8 {ECO:0000255|PROSITE-ProRule:PRU01096};	A0A0P0UXN4_ORYSJ SubName: Full=Os01g0134800 protein {ECO:0000313|EMBL:BAF03860.1}; Flags: Fragment;	At4g08160	GO:0031176,endo-1,4-beta-xylanase activity; GO:0045493,xylan catabolic process; GO:0003674,molecular_function; GO:0003824,catalytic activity; GO:0004553,hydrolase activity, hydrolyzing O-glycosyl compounds; GO:0016787,hydrolase activity; GO:0016798,hydrolase activity, acting on glycosyl bonds; GO:0097599,xylanase activity; GO:0000272,polysaccharide catabolic process; GO:0005975,carbohydrate metab…
Os01g0136700	0.5555	0.878	0.71675	0.246	0.2855	0.3434	0.0984	0.1088	0.088	0.2484	0.2707	0.1856	40	65	52.5	19	32	34	9	11	7	29	30	21	-1.26939	0.000535012	0.00369577	down	-2.80682	3.92624e-11	3.96465e-10	down	-1.55399	3.19068e-05	0.000206244	down	1	1971228	1975465	-	Os01g0136700	Conserved hypothetical protein	--	--	--	LRL12_ARATH RecName: Full=LEAF RUST 10 DISEASE-RESISTANCE LOCUS RECEPTOR-LIKE PROTEIN KINASE-like 1.2 {ECO:0000303|PubMed:12805585}; EC=2.7.11.1; AltName: Full=Probable receptor-like serine/threonine-protein kinase LRK10L-1.2 {ECO:0000305}; Flags: Precursor;	A0A0P0UXW0_ORYSJ SubName: Full=Os01g0136700 protein {ECO:0000313|EMBL:BAS70272.1}; Flags: Fragment;	At1g18390	GO:0016021,integral component of membrane; GO:0005886,plasma membrane; GO:0005524,ATP binding; GO:0016301,kinase activity; GO:0030247,polysaccharide binding; GO:0106310,protein serine kinase activity; GO:0106311,protein threonine kinase activity; GO:0071215,cellular response to abscisic acid stimulus; GO:0042631,cellular response to water deprivation; GO:0016310,phosphorylation; GO:0048573,photop…
Os01g0137200	2.6055	4.1743	3.3899	0.8575	2.0675	1.5604	0.9397	1.2548	0.6246	2.5527	1.6431	1.1706	34	56	45	12	42	28	16	23	9	54	33	24	-1.14461	0.00702705	0.0311141	down	-1.77637	9.23605e-06	4.57738e-05	down	-0.87397	0.0320673	0.079361	false	1	1993553	1994320	+	OsRLCK20	Hypothetical conserved gene	--	--	--	--	A0A0P0UYE0_ORYSJ SubName: Full=Os01g0137200 protein {ECO:0000313|EMBL:BAS70278.1};	--	GO:0030247,polysaccharide binding; GO:0003674,molecular_function; GO:0005488,binding; GO:0030246,carbohydrate binding
Os01g0137500	5.2931	5.5295	5.4113	0.9046	1.4212	2.0793	0.97345	0.9451	1.0018	1.8268	1.128	0.8991	311	334	322.5	57	130	168	71.5	78	65	174	102	83	-1.85596	4.50141e-14	2.00343e-12	down	-2.43265	1.11475e-49	8.0108e-48	down	-2.02512	2.36954e-17	9.81241e-16	down	1	2014791	2018248	+	OsRLCK22	Protein kinase%2C catalytic domain domain containing protein	K13418 somatic embryogenesis receptor kinase 1 [EC:2.7.10.1 2.7.11.1] | (RefSeq) somatic embryogenesis receptor kinase 2 isoform X1 (A)	--	--	LRL21_ARATH RecName: Full=LEAF RUST 10 DISEASE-RESISTANCE LOCUS RECEPTOR-LIKE PROTEIN KINASE-like 2.1 {ECO:0000303|PubMed:12805585}; EC=2.7.11.1; AltName: Full=Probable receptor-like serine/threonine-protein kinase LRK10L-2.1 {ECO:0000305}; Flags: Precursor;	A0A0D9Y2Z0_9ORYZ RecName: Full=Protein kinase domain-containing protein {ECO:0000259|PROSITE:PS50011};	At5g38260	GO:0016021,integral component of membrane; GO:0005524,ATP binding; GO:0030247,polysaccharide binding; GO:0106310,protein serine kinase activity; GO:0106311,protein threonine kinase activity; GO:0000166,nucleotide binding; GO:0003674,molecular_function; GO:0005488,binding; GO:0017076,purine nucleotide binding; GO:0030554,adenyl nucleotide binding; GO:0032553,ribonucleotide binding; GO:0032555,puri…
Os01g0138400	13.0045	14.6995	13.852	3.7384	4.7545	5.5507	3.19615	3.3667	3.0256	4.8196	2.8889	3.2388	506	588	547	156	288	297	157	184	130	304	173	198	-1.54158	7.97907e-22	6.93586e-20	down	-2.06885	1.31611e-57	1.20911e-55	down	-1.87351	9.05619e-23	6.30618e-21	down	1	2053583	2057636	+	Os01g0138400	Serine/threonine protein kinase domain containing protein	K13418 somatic embryogenesis receptor kinase 1 [EC:2.7.10.1 2.7.11.1] | (RefSeq) somatic embryogenesis receptor kinase 1 (A)	--	--	LRL27_ARATH RecName: Full=LEAF RUST 10 DISEASE-RESISTANCE LOCUS RECEPTOR-LIKE PROTEIN KINASE-like 2.7 {ECO:0000303|PubMed:12805585}; EC=2.7.11.1 {ECO:0000255|PROSITE-ProRule:PRU00159}; AltName: Full=Probable receptor-like serine/threonine-protein kinase LRK10L-2.7 {ECO:0000305}; Flags: Precursor;	Q0JQU4_ORYSJ SubName: Full=Os01g0138400 protein {ECO:0000313|EMBL:BAF03884.1}; SubName: Full=Putative receptor serine/threonine kinase PR5K {ECO:0000313|EMBL:BAD61471.1};	At5g38260	GO:0016021,integral component of membrane; GO:0005524,ATP binding; GO:0030247,polysaccharide binding; GO:0106310,protein serine kinase activity; GO:0106311,protein threonine kinase activity; GO:0000166,nucleotide binding; GO:0003674,molecular_function; GO:0005488,binding; GO:0017076,purine nucleotide binding; GO:0030554,adenyl nucleotide binding; GO:0032553,ribonucleotide binding; GO:0032555,puri…
Os01g0138800	0.301	1.1713	0.73615	0.2105	0.5801	0.4105	0.15465	0.2411	0.0682	0.5571	0.3423	0.5269	8	32	20	6	24	15	5.5	9	2	24	14	22	-0.846243	0.19157	0.367931	false	-2.11265	0.00227878	0.00691515	down	-0.577555	0.334971	0.479523	false	1	2071843	2073609	+	Os01g0138800	Peptidase C26 domain containing protein	--	--	--	GT121_ARATH RecName: Full=Putative glutamine amidotransferase GAT1_2.1 {ECO:0000305}; EC=2.4.2.- {ECO:0000305}; AltName: Full=Class I glutamine amidotransferase {ECO:0000303|PubMed:22885937}; AltName: Full=GAT1_2 domain-containing protein 1 {ECO:0000305};	A0A0P0UYH7_ORYSJ SubName: Full=Os01g0138800 protein {ECO:0000313|EMBL:BAF03887.1};	At5g38200	GO:0016811,hydrolase activity, acting on carbon-nitrogen (but not peptide) bonds, in linear amides; GO:0016740,transferase activity; GO:0006541,glutamine metabolic process; GO:2000032,regulation of secondary shoot formation; GO:0003674,molecular_function; GO:0003824,catalytic activity; GO:0016787,hydrolase activity; GO:0016810,hydrolase activity, acting on carbon-nitrogen (but not peptide) bonds;…
Os01g0139900	6.7309	1.9163	4.3236	1.4542	1.5291	2.1489	2.41655	2.4544	2.3787	2.8862	1.9733	2.56	82	24	53	19	29	36	37	42	32	57	37	49	-1.31394	0.00566096	0.02629	down	-0.794691	0.0560448	0.107983	false	-0.752582	0.101716	0.196926	false	1	2108961	2109677	-	Os01g0139900	Conserved hypothetical protein	--	--	--	--	B9EZF2_ORYSJ SubName: Full=Os01g0139900 protein {ECO:0000313|EMBL:BAF03892.1};	--	--
Os01g0143900	12.7072	15.8919	14.2995	7.4833	4.6643	4.8635	4.6333	4.4214	4.8452	5.0096	7.4493	2.7973	133	171	152	84	76	70	60.5	65	56	85	120	46	-1.32513	2.03552e-07	3.37086e-06	down	-1.59321	2.07045e-14	2.8086e-13	down	-1.44296	7.69342e-06	5.69991e-05	down	1	2377369	2377984	-	Os01g0143900	Conserved hypothetical protein	--	--	--	--	A0A0E0FG35_ORYNI SubName: Full=Uncharacterized protein {ECO:0000313|EnsemblPlants:ONIVA01G03120.1};	--	GO:0016021,integral component of membrane; GO:0008168,methyltransferase activity; GO:0045488,pectin metabolic process; GO:0003674,molecular_function; GO:0003824,catalytic activity; GO:0016740,transferase activity; GO:0016741,transferase activity, transferring one-carbon groups; GO:0005975,carbohydrate metabolic process; GO:0005976,polysaccharide metabolic process; GO:0008150,biological_process; G…
Os01g0144900	1.2671	1.521	1.39405	0.4274	0.4156	0.4705	0.9499	1.0941	0.8057	0.9979	0.7532	1.5272	47	58	52.5	17	24	24	45	57	33	60	43	89	-1.64738	5.38618e-06	6.61476e-05	down	-0.494011	0.0830143	0.149852	false	-0.288398	0.419221	0.561951	false	1	2416643	2418825	+	Os01g0144900	Hypothetical protein	--	--	--	--	A0A0P0UYG6_ORYSJ SubName: Full=Os01g0144900 protein {ECO:0000313|EMBL:BAF03922.1};	--	--
Os01g0150900	1.4355	2.4435	1.9395	4.2385	2.5357	4.3494	4.7413	6.5577	2.9249	4.2061	1.7099	4.1114	12	21	16.5	38	33	50	52	77	27	57	22	54	0.962153	0.0379092	0.115873	false	1.36899	0.00118077	0.00384461	up	0.853806	0.0981646	0.191492	false	1	2752144	2761554	+	Os01g0150900	Conserved hypothetical protein	K10703 very-long-chain (3R)-3-hydroxyacyl-CoA dehydratase [EC:4.2.1.134] | (RefSeq) very-long-chain (3R)-3-hydroxyacyl-CoA dehydratase PASTICCINO 2A-like (A)	ko00062: Fatty acid elongation; ko01040: Biosynthesis of unsaturated fatty acids; ko01100: Metabolic pathways; ko01110: Biosynthesis of secondary metabolites; ko01212: Fatty acid metabolism	--	HACDA_ORYSJ RecName: Full=Very-long-chain (3R)-3-hydroxyacyl-CoA dehydratase PASTICCINO 2A {ECO:0000305}; EC=4.2.1.134 {ECO:0000250|UniProtKB:Q8VZB2}; AltName: Full=3-hydroxyacyl-CoA dehydratase PASTICCINO 2A; Short=HACD; Short=PAS2A; AltName: Full=Protein tyrosine phosphatase-like protein;	A0A0P0UYB4_ORYSJ SubName: Full=Os01g0150900 protein {ECO:0000313|EMBL:BAS70420.1}; Flags: Fragment;	--	GO:0030176,integral component of endoplasmic reticulum membrane; GO:0102343,3-hydroxy-arachidoyl-CoA dehydratase activity; GO:0102344,3-hydroxy-behenoyl-CoA dehydratase activity; GO:0102345,3-hydroxy-lignoceroyl-CoA dehydratase activity; GO:0018812,3-hydroxyacyl-CoA dehydratase activity; GO:0102158,very-long-chain 3-hydroxyacyl-CoA dehydratase activity; GO:0030497,fatty acid elongation; GO:000727…
Os01g0150950	1.1026	2.9586	2.0306	2.9424	1.8805	2.1842	4.9512	6.6316	3.2708	2.3453	1.1116	1.7423	29	80	54.5	83	77	79	170	245	95	100	45	72	0.22154	0.557744	0.730187	false	1.34828	6.11975e-05	0.000263883	up	-0.172826	0.68299	0.788081	false	1	2753663	2755342	+	Os01g0150950	Conserved hypothetical protein	--	--	--	--	A0A0P0WYT1_ORYSJ SubName: Full=Os06g0606250 protein {ECO:0000313|EMBL:BAS98530.1};	--	--
Os01g0152000	14.0148	12.4453	13.2301	5.1513	6.8024	7.9871	4.9324	4.1013	5.7635	8.5481	7.1449	6.3393	1068	975	1021.5	421	807	837	462	439	485	1056	838	759	-0.972529	2.83481e-10	7.60164e-09	false	-1.39104	5.43491e-23	1.30588e-21	down	-0.798471	8.58723e-10	1.36399e-08	false	1	2810313	2815017	+	Os01g0152000	Protein kinase%2C core domain containing protein	K13437 receptor kinase-like protein | (RefSeq) probable LRR receptor-like serine/threonine-protein kinase At3g47570 (A)	ko04626: Plant-pathogen interaction	--	Y3475_ARATH RecName: Full=Probable LRR receptor-like serine/threonine-protein kinase At3g47570; EC=2.7.11.1; Flags: Precursor;	A0A0P0UYB9_ORYSJ SubName: Full=Os01g0152000 protein {ECO:0000313|EMBL:BAF03957.1};	At3g47090	GO:0016021,integral component of membrane; GO:0005886,plasma membrane; GO:0005524,ATP binding; GO:0106310,protein serine kinase activity; GO:0106311,protein threonine kinase activity; GO:0000166,nucleotide binding; GO:0003674,molecular_function; GO:0005488,binding; GO:0017076,purine nucleotide binding; GO:0030554,adenyl nucleotide binding; GO:0032553,ribonucleotide binding; GO:0032555,purine ribo…
Os01g0152300	104.903	71.5816	88.2422	35.9035	53.806	70.6078	34.2704	36.5306	32.0103	32.4096	29.4064	51.0252	1196	839	1017.5	439	955	1107	494	585	403	599	516	914	-0.70511	0.00105589	0.0065612	false	-1.31847	2.09218e-19	4.09469e-18	down	-1.17176	2.04299e-07	2.10665e-06	down	1	2820074	2820744	-	Os01g0152300	Similar to Histone H2B.1	K11252 histone H2B | (RefSeq) histone H2B.10 (A)	--	--	H2B10_ORYSJ RecName: Full=Histone H2B.10;	A0A0E0MRF5_ORYRU RecName: Full=Histone H2B {ECO:0000256|RuleBase:RU000451};	At3g46030	GO:0000786,nucleosome; GO:0005634,nucleus; GO:0003677,DNA binding; GO:0046982,protein heterodimerization activity; GO:0006334,nucleosome assembly; GO:0003674,molecular_function; GO:0003676,nucleic acid binding; GO:0005488,binding; GO:0097159,organic cyclic compound binding; GO:1901363,heterocyclic compound binding; GO:0005515,protein binding; GO:0046983,protein dimerization activity; GO:0006323,D…
Os01g0154950	0.6539	1.1009	0.8774	0.1173	0.1292	0.0366	0.06755	0.0895	0.0456	0.1862	0.1798	0.2401	26	45	35.5	5	8	2	3.5	5	2	12	11	15	-3.20776	9.83159e-08	1.73112e-06	down	-3.55436	1.90673e-09	1.59134e-08	down	-2.07094	1.19246e-05	8.51649e-05	down	1	2954510	2956849	+	Os01g0154950	Hypothetical gene	K14493 gibberellin receptor GID1 [EC:3.-.-.-] | (RefSeq) gibberellin receptor GID1 (A)	ko04075: Plant hormone signal transduction	--	CXE15_ARATH RecName: Full=Probable carboxylesterase 15; AltName: Full=AtCXE15; EC=3.1.1.1;	A0A0N7KCD0_ORYSJ SubName: Full=Os01g0154950 protein {ECO:0000313|EMBL:BAS70473.1}; Flags: Fragment;	At5g06570	GO:0016787,hydrolase activity; GO:0080030,methyl indole-3-acetate esterase activity; GO:0003674,molecular_function; GO:0003824,catalytic activity; GO:0016788,hydrolase activity, acting on ester bonds; GO:0052689,carboxylic ester hydrolase activity
Os01g0155000	1.2011	1.5278	1.36445	0.3877	0.2671	0.6047	0.2077	0.1644	0.251	1.1399	0.6003	0.5293	26	34	30	9	9	18	5.5	5	6	40	20	18	-1.68723	0.000874673	0.00559269	down	-2.65872	4.10213e-07	2.52896e-06	down	-0.801742	0.0808039	0.164799	false	1	2957166	2958439	-	Hsr203j	Alpha/beta hydrolase fold-3 domain containing protein	K14493 gibberellin receptor GID1 [EC:3.-.-.-] | (RefSeq) gibberellin receptor GID1 (A)	ko04075: Plant hormone signal transduction	--	CXE15_ARATH RecName: Full=Probable carboxylesterase 15; AltName: Full=AtCXE15; EC=3.1.1.1;	Q93VD4_ORYSJ SubName: Full=Os01g0155000 protein {ECO:0000313|EMBL:BAS70474.1}; SubName: Full=cDNA clone:001-007-A09, full insert sequence {ECO:0000313|EMBL:BAG87397.1}; SubName: Full=cDNA clone:J033053C20, full insert sequence {ECO:0000313|EMBL:BAG93577.1};	At5g06570	GO:0016787,hydrolase activity; GO:0080030,methyl indole-3-acetate esterase activity; GO:0003674,molecular_function; GO:0003824,catalytic activity; GO:0016788,hydrolase activity, acting on ester bonds; GO:0052689,carboxylic ester hydrolase activity
Os01g0158400	7.7391	8.0135	7.8763	14.1995	12.1874	13.7972	15.3612	14.2188	16.5036	13.8214	17.6398	12.6718	124	132	128	244	304	304	306	320	292	359	435	319	0.784475	7.0835e-06	8.45933e-05	false	1.00089	1.54688e-10	1.47252e-09	up	0.953699	5.51155e-07	5.19346e-06	false	1	3058564	3059717	-	Os01g0158400	Galactose-binding like domain containing protein	--	--	--	P2A01_ARATH RecName: Full=Protein PHLOEM PROTEIN 2-LIKE A1; Short=AtPP2-A1;	Q5ZEM1_ORYSJ SubName: Full=Os01g0158400 protein {ECO:0000313|EMBL:BAS70501.1}; SubName: Full=cDNA clone:001-121-G12, full insert sequence {ECO:0000313|EMBL:BAG88873.1};	At4g19840	GO:0030246,carbohydrate binding; GO:0043394,proteoglycan binding; GO:0009625,response to insect; GO:0003674,molecular_function; GO:0005488,binding; GO:0005515,protein binding; GO:0097367,carbohydrate derivative binding; GO:0008150,biological_process; GO:0009605,response to external stimulus; GO:0009607,response to biotic stimulus; GO:0043207,response to external biotic stimulus; GO:0044419,biolog…
Os01g0160700	0.6328	0.7835	0.70815	0.1967	0.4681	0.3626	0.19975	0.1911	0.2084	0.1774	0.2866	0.2807	33	42	37.5	11	38	26	13	14	12	15	23	23	-1.01637	0.0180878	0.0653704	false	-1.79604	7.7416e-06	3.88606e-05	down	-1.46461	0.000481734	0.00225332	down	1	3182139	3185207	+	Os01g0160700	Leucine-rich repeat%2C N-terminal domain containing protein	--	--	--	RLP6_ARATH RecName: Full=Receptor-like protein 6 {ECO:0000303|PubMed:18434605}; Short=AtRLP6 {ECO:0000303|PubMed:18434605}; Flags: Precursor;	A2ZPJ3_ORYSJ SubName: Full=Os01g0160700 protein {ECO:0000313|EMBL:BAH90920.1}; SubName: Full=Putative verticillium wilt disease resistance protein {ECO:0000313|EMBL:BAA96777.1};	At1g45616	GO:0016021,integral component of membrane; GO:0005886,plasma membrane; GO:0005575,cellular_component; GO:0016020,membrane; GO:0031224,intrinsic component of membrane; GO:0110165,cellular anatomical entity; GO:0071944,cell periphery
Os01g0162500	2.4133	2.402	2.40765	0.8198	0.7811	1.2652	0.62585	0.6926	0.5591	1.5579	1.2398	0.7859	129	132	130.5	47	65	93	42.5	52	33	135	102	66	-1.31104	3.39604e-07	5.43439e-06	down	-1.89441	5.3968e-17	9.08267e-16	down	-0.960715	0.000343064	0.00167922	false	1	3259516	3262661	+	Os01g0162500	Leucine-rich repeat-containing N-terminal%2C type 2 domain containing protein	--	--	--	RLP35_ARATH RecName: Full=Receptor-like protein 35 {ECO:0000303|PubMed:18434605}; Short=AtRLP35 {ECO:0000303|PubMed:18434605}; Flags: Precursor;	C7IXQ3_ORYSJ SubName: Full=Os01g0162500 protein {ECO:0000313|EMBL:BAH90922.1}; Flags: Fragment;	At3g11080	GO:0016021,integral component of membrane; GO:0005886,plasma membrane; GO:0005575,cellular_component; GO:0016020,membrane; GO:0031224,intrinsic component of membrane; GO:0110165,cellular anatomical entity; GO:0071944,cell periphery
Os01g0165200	2.2734	2.1907	2.23205	1.3868	1.1874	2.3331	1.09975	0.9681	1.2314	0.7995	0.8283	1.3388	107	106	106.5	70	87	151	64	64	64	61	60	99	-0.427195	0.135287	0.291291	false	-0.98823	8.59482e-06	4.28042e-05	false	-1.11422	0.000100407	0.000569235	down	1	3362001	3367658	-	Os01g0165200	Kelch-type beta propeller domain containing protein	--	--	--	B2_DAUCA RecName: Full=B2 protein;	Q5VQH0_ORYSJ SubName: Full=Os01g0165200 protein {ECO:0000313|EMBL:BAS70563.1}; SubName: Full=cDNA clone:J013070N02, full insert sequence {ECO:0000313|EMBL:BAG90074.1};	At5g01660_1	--
Os01g0166800	11.9856	10.8681	11.4268	5.2226	6.4313	8.8425	4.78935	5.2686	4.3101	6.5342	7.3161	4.9872	413	385	399	193	345	419	209.5	255	164	365	388	270	-0.720834	0.000147568	0.00123279	false	-1.20277	4.13671e-19	7.93699e-18	down	-0.81271	1.26158e-06	1.10262e-05	false	1	3425794	3429573	-	Os01g0166800	Similar to ETG1 (E2F TARGET GENE 1)	--	--	--	MCMBP_ARATH RecName: Full=Mini-chromosome maintenance complex-binding protein; Short=MCM-BP; Short=MCM-binding protein; AltName: Full=Protein E2F TARGET GENE 1;	Q5VQH6_ORYSJ SubName: Full=Os01g0166800 protein {ECO:0000313|EMBL:BAS70576.1}; SubName: Full=cDNA clone:J033067O18, full insert sequence {ECO:0000313|EMBL:BAG94096.1}; SubName: Full=cDNA clone:J033068H14, full insert sequence {ECO:0000313|EMBL:BAG93636.1};	At2g40550	GO:0009941,chloroplast envelope; GO:0042555,MCM complex; GO:0005634,nucleus; GO:0003682,chromatin binding; GO:0051301,cell division; GO:0006260,DNA replication; GO:0006261,DNA-dependent DNA replication; GO:0006301,postreplication repair; GO:0007062,sister chromatid cohesion; GO:0003674,molecular_function; GO:0005488,binding; GO:0008150,biological_process; GO:0009987,cellular process; GO:0008152,m…
Os01g0168800	3.4515	2.7469	3.0992	4.9737	3.3112	8.4423	6.90935	5.0102	8.8085	8.627	10.4264	24.507	77	63	70	119	115	259	187	157	217	312	358	859	0.865613	0.00947634	0.039337	false	1.1843	2.58227e-06	1.40002e-05	up	2.29369	2.71393e-10	4.66896e-09	up	1	3516766	3519077	-	Os01g0168800	Alpha/beta hydrolase fold-1 domain containing protein	--	--	--	--	Q9AS70_ORYSJ SubName: Full=Os01g0168800 protein {ECO:0000313|EMBL:BAS70596.1}; SubName: Full=p0028E10.22 protein {ECO:0000313|EMBL:BAB39918.1};	At5g09430	--
Os01g0169800	20.5702	15.8836	18.2269	2.179	3.1875	15.399	1.60165	1.7664	1.4369	1.5305	1.106	0.9732	713	566	639.5	81	172	734	70.5	86	55	86	59	53	-1.38598	0.0965404	0.229598	false	-3.45923	1.39728e-93	2.55735e-91	down	-3.86895	2.91289e-84	2.83971e-81	down	1	3577473	3581859	-	FIB	Tryptophan aminotransferase%2C Indole-3-acetic acid (IAA) biosynthesi	K16903 L-tryptophan---pyruvate aminotransferase [EC:2.6.1.99] | (RefSeq) L-tryptophan--pyruvate aminotransferase 1 (A)	ko00380: Tryptophan metabolism; ko01100: Metabolic pathways	--	TAR2_ORYSJ RecName: Full=Tryptophan aminotransferase-related protein 2 {ECO:0000303|PubMed:22582989}; Short=OsTAR2 {ECO:0000303|PubMed:22582989}; EC=2.6.1.27 {ECO:0000305}; AltName: Full=Protein FISH BONE {ECO:0000303|PubMed:24654985};	A0A0D3EK26_9ORYZ RecName: Full=Alliinase_C domain-containing protein {ECO:0000259|Pfam:PF04864};	At4g24670	GO:0016846,carbon-sulfur lyase activity; GO:0050362,L-tryptophan:2-oxoglutarate aminotransferase activity; GO:0009851,auxin biosynthetic process; GO:0003674,molecular_function; GO:0003824,catalytic activity; GO:0016829,lyase activity; GO:0008483,transaminase activity; GO:0016740,transferase activity; GO:0016769,transferase activity, transferring nitrogenous groups; GO:0070529,L-tryptophan aminotr…
Os01g0170300	0.2203	0.3857	0.303	0.0274	0.0755	0.1815	0.1183	0.1568	0.0798	0.1993	0.1908	0.1495	15	27	21	2	8	17	10.5	15	6	22	20	16	-1.64	0.0159242	0.0591512	false	-1.30779	0.0122237	0.0299827	down	-0.701409	0.155979	0.272896	false	1	3621211	3625338	+	Os01g0170300	Serine/threonine protein kinase-related domain containing protein	K20718 LRR receptor-like serine/threonine-protein kinase ERECTA [EC:2.7.11.1] | (RefSeq) LRR receptor-like serine/threonine-protein kinase ERECTA isoform X1 (A)	ko04016: MAPK signaling pathway - plant	--	RGI4_ARATH RecName: Full=Leucine-rich repeat receptor-like serine/threonine-protein kinase RGI4 {ECO:0000305|PubMed:27229312}; EC=2.7.11.1 {ECO:0000255|PROSITE-ProRule:PRU00159}; AltName: Full=Protein RECEPTOR OF RGF1 2 {ECO:0000303|PubMed:27229311}; AltName: Full=Protein RGF1 INSENSITIVE 4 {ECO:0000303|PubMed:27229312}; AltName: Full=Protein STERILITY-REGULATING KINASE MEMBER 2 {ECO:0000303|PubM…	Q5VQM7_ORYSJ SubName: Full=Os01g0170300 protein {ECO:0000313|EMBL:BAS70611.1}; SubName: Full=cDNA, clone: J065161B03, full insert sequence {ECO:0000313|EMBL:BAH01025.1};	At5g56040	GO:0016021,integral component of membrane; GO:0005886,plasma membrane; GO:0005524,ATP binding; GO:0042277,peptide binding; GO:0001653,peptide receptor activity; GO:0106310,protein serine kinase activity; GO:0106311,protein threonine kinase activity; GO:0010074,maintenance of meristem identity; GO:0080092,regulation of pollen tube growth; GO:0010082,regulation of root meristem growth; GO:0009266,r…
Os01g0170700	1.243	1.678	1.4605	0.7096	0.7333	0.5165	0.89945	0.903	0.8959	1.1893	1.3845	0.8235	49	68	58.5	30	45	28	44.5	50	39	76	84	51	-1.13813	0.000754633	0.00493998	down	-0.65918	0.0175435	0.040785	false	-0.312971	0.318684	0.462776	false	1	3652273	3656479	+	Os01g0170700	Thiol-activated cytolysin family protein	--	--	--	--	A0A0E0FGV3_ORYNI SubName: Full=Uncharacterized protein {ECO:0000313|EnsemblPlants:ONIVA01G05030.1};	--	--
Os01g0172600	3.863	3.6102	3.7366	11.7948	5.5953	7.8216	14.7978	12.2413	17.3543	7.8498	12.156	19.1395	51	49	50	167	115	142	240	227	253	168	247	397	1.18678	0.000198083	0.00158895	up	2.01814	8.93785e-20	1.77447e-18	up	1.86662	3.67654e-08	4.4e-07	up	1	3732525	3734022	+	Os01g0172600	Similar to electron carrier/ heme binding / peroxidase	K00430 peroxidase [EC:1.11.1.7] | (RefSeq) peroxidase 25 (A)	ko00940: Phenylpropanoid biosynthesis; ko01100: Metabolic pathways; ko01110: Biosynthesis of secondary metabolites	--	PER25_ARATH RecName: Full=Peroxidase 25; Short=Atperox P25; EC=1.11.1.7; Flags: Precursor;	A0A0P0UYV2_ORYSJ RecName: Full=Peroxidase {ECO:0000256|ARBA:ARBA00012313}; EC=1.11.1.7 {ECO:0000256|ARBA:ARBA00012313}; Flags: Fragment;	At2g41480	GO:0005576,extracellular region; GO:0009505,plant-type cell wall; GO:0009506,plasmodesma; GO:0020037,heme binding; GO:0046872,metal ion binding; GO:0004601,peroxidase activity; GO:0042744,hydrogen peroxide catabolic process; GO:0006979,response to oxidative stress; GO:0003674,molecular_function; GO:0005488,binding; GO:0046906,tetrapyrrole binding; GO:0097159,organic cyclic compound binding; GO:19…
Os01g0172701	0.5975	0.5231	0.5603	0.6128	1.1514	1.0428	1.4846	1.6165	1.3527	0.9583	1.2811	1.9776	10	9	9.5	11	30	24	31.5	38	25	26	33	52	0.745152	0.201029	0.379791	false	1.43808	0.00169175	0.00529566	up	1.36228	0.0128015	0.0375148	up	1	3732983	3733967	-	Os01g0172701	Regulator of chromosome condensation%2C RCC1 domain containing protein	K00430 peroxidase [EC:1.11.1.7] | (RefSeq) peroxidase 25 (A)	ko00940: Phenylpropanoid biosynthesis; ko01100: Metabolic pathways; ko01110: Biosynthesis of secondary metabolites	--	PER25_ARATH RecName: Full=Peroxidase 25; Short=Atperox P25; EC=1.11.1.7; Flags: Precursor;	A0A0P0UYM3_ORYSJ SubName: Full=Os01g0172701 protein {ECO:0000313|EMBL:BAS70640.1}; Flags: Fragment;	At2g41480	GO:0005576,extracellular region; GO:0009505,plant-type cell wall; GO:0009506,plasmodesma; GO:0020037,heme binding; GO:0046872,metal ion binding; GO:0004601,peroxidase activity; GO:0042744,hydrogen peroxide catabolic process; GO:0006979,response to oxidative stress; GO:0003674,molecular_function; GO:0005488,binding; GO:0046906,tetrapyrrole binding; GO:0097159,organic cyclic compound binding; GO:19…
Os01g0173900	16.7166	21.9887	19.3527	8.8491	12.4108	11.2946	6.9948	8.0511	5.9385	10.0152	8.2928	6.7721	1425	1927	1676	809	1647	1324	761.5	964	559	1384	1088	907	-0.814623	2.5525e-08	5.04524e-07	false	-1.41729	3.6792e-27	1.07876e-25	down	-1.16085	3.55e-14	1.03954e-12	down	1	3804672	3810720	+	OsABCC3	Similar to MRP-like ABC transporter	K05674 ATP-binding cassette, subfamily C (CFTR/MRP), member 10 | (RefSeq) ABC transporter C family member 13 isoform X1 (A)	ko02010: ABC transporters	--	AB3C_ARATH RecName: Full=ABC transporter C family member 3; Short=ABC transporter ABCC.3; Short=AtABCC3; EC=7.6.2.2; AltName: Full=ATP-energized glutathione S-conjugate pump 3; AltName: Full=Glutathione S-conjugate-transporting ATPase 3; AltName: Full=Multidrug resistance-associated protein 3;	A0A0E0MS12_ORYRU SubName: Full=Uncharacterized protein {ECO:0000313|EnsemblPlants:ORUFI01G05040.1};	At3g13080	GO:0048046,apoplast; GO:0016021,integral component of membrane; GO:0016020,membrane; GO:0000325,plant-type vacuole; GO:0009506,plasmodesma; GO:0005774,vacuolar membrane; GO:0005773,vacuole; GO:0015431,ABC-type glutathione S-conjugate transporter activity; GO:0008559,ABC-type xenobiotic transporter activity; GO:0005524,ATP binding; GO:0042626,ATPase-coupled transmembrane transporter activity; GO:0…
Os01g0174400	0.3069	0.4105	0.3587	0.5008	0.5915	0.7533	0.79375	0.8058	0.7817	0.4733	0.6107	0.3175	16	22	19	28	48	54	52	59	45	40	49	26	0.799801	0.0551298	0.152954	false	1.18781	0.000586375	0.00205398	up	0.430355	0.345146	0.489624	false	1	3825669	3829404	+	Os01g0174400	Hypothetical gene	K00472 prolyl 4-hydroxylase [EC:1.14.11.2] | (RefSeq) probable prolyl 4-hydroxylase 6 isoform X1 (A)	ko00330: Arginine and proline metabolism; ko01100: Metabolic pathways	--	P4H7_ARATH RecName: Full=Probable prolyl 4-hydroxylase 7 {ECO:0000305}; Short=AtP4H7 {ECO:0000303|Ref.5}; EC=1.14.11.2 {ECO:0000305};	B7EHY4_ORYSJ RecName: Full=Procollagen-proline 4-dioxygenase {ECO:0000256|ARBA:ARBA00012269}; EC=1.14.11.2 {ECO:0000256|ARBA:ARBA00012269};	At3g28480	GO:0005783,endoplasmic reticulum; GO:0005789,endoplasmic reticulum membrane; GO:0016021,integral component of membrane; GO:0005506,iron ion binding; GO:0031418,L-ascorbic acid binding; GO:0004656,procollagen-proline 4-dioxygenase activity; GO:0018401,peptidyl-proline hydroxylation to 4-hydroxy-L-proline; GO:0003674,molecular_function; GO:0005488,binding; GO:0043167,ion binding; GO:0043169,cation …
Os01g0175400	1.0997	0.8985	0.9991	0.3281	0.7911	0.6397	0.39845	0.4384	0.3585	0.2985	0.4859	0.336	25	21	23	8	28	20	11.5	14	9	11	17	12	-0.729711	0.150021	0.312875	false	-1.25267	0.00721119	0.0190566	down	-1.36762	0.00756321	0.0241513	down	1	3870734	3874321	-	Os01g0175400	Ankyrin repeat containing protein	K24194 boron transporter | (RefSeq) uncharacterized protein LOC4326215 (A)	--	--	--	Q5VQZ7_ORYSJ SubName: Full=Os01g0175400 protein {ECO:0000313|EMBL:BAS70665.1}; SubName: Full=cDNA clone:J033087A12, full insert sequence {ECO:0000313|EMBL:BAG95435.1};	YCR051w	--
Os01g0175700	0.8454	0.7089	0.77715	1.0329	0.5992	0.9115	1.56815	1.1829	1.9534	0.5215	1.4773	0.9277	29	25	27	38	32	43	65.5	57	74	29	78	50	0.13794	0.734163	0.856524	false	1.04247	0.0015983	0.0050388	up	0.38388	0.407366	0.550488	false	1	3894296	3898729	-	BOR2	Boron (B) transporte	K24194 boron transporter | (RefSeq) boron transporter 4-like (A)	--	--	BOR4_ARATH RecName: Full=Boron transporter 4;	Q1ZYR7_ORYSJ SubName: Full=Boron transporter {ECO:0000313|EMBL:ABD78950.1}; SubName: Full=Os01g0175700 protein {ECO:0000313|EMBL:BAS70670.1};	At1g15460	GO:0016021,integral component of membrane; GO:0005886,plasma membrane; GO:0015301,anion:anion antiporter activity; GO:0080139,borate efflux transmembrane transporter activity; GO:0005452,inorganic anion exchanger activity; GO:0022857,transmembrane transporter activity; GO:0046713,borate transport; GO:0080029,cellular response to boron-containing substance levels; GO:0050801,ion homeostasis; GO:00…
Os01g0175850	0.9146	1.6633	1.28895	0.0742	0.3065	0.1446	0.32295	0.5379	0.108	0.5151	0.1292	0	23	43	33	2	12	5	11	19	3	21	5	0	-2.80897	3.77582e-06	4.83516e-05	down	-1.89404	0.000289906	0.00108788	down	-2.54638	0.00233518	0.0089173	down	1	3914804	3916283	-	Os01g0175850	UDP-glucuronosyl/UDP-glucosyltransferase domain containing protein	K13496 UDP-glucosyltransferase 73C [EC:2.4.1.-] | (RefSeq) UDP-glycosyltransferase 73C1 (A)	ko00908: Zeatin biosynthesis; ko01110: Biosynthesis of secondary metabolites	--	U73C5_ARATH RecName: Full=UDP-glycosyltransferase 73C5; EC=2.4.1.-; AltName: Full=Cytokinin-O-glucosyltransferase 3; AltName: Full=Deoxynivalenol-glucosyl-transferase 1; AltName: Full=Zeatin O-glucosyltransferase 3; Short=AtZOG3;	A0A0D9Y413_9ORYZ RecName: Full=Glycosyltransferase {ECO:0000256|RuleBase:RU362057}; EC=2.4.1.- {ECO:0000256|RuleBase:RU362057};	At2g36800	GO:0005783,endoplasmic reticulum; GO:0016021,integral component of membrane; GO:0050502,cis-zeatin O-beta-D-glucosyltransferase activity; GO:0046527,glucosyltransferase activity; GO:0080046,quercetin 4'-O-glucosyltransferase activity; GO:0080044,quercetin 7-O-glucosyltransferase activity; GO:0050403,trans-zeatin O-beta-D-glucosyltransferase activity; GO:0008194,UDP-glycosyltransferase activity; G…
Os01g0176000	1.5308	2.6929	2.11185	1.3059	0.8369	0.7105	0.82505	0.7652	0.8849	0.8037	0.656	0.8499	47	85	66	43	40	30	31.5	33	30	40	31	41	-1.14239	0.00193487	0.010992	down	-1.31431	3.28651e-05	0.000149062	down	-1.40158	4.77302e-05	0.000294333	down	1	3917918	3920432	+	OsUGT98B1	UDP-glucuronosyl/UDP-glucosyltransferase family protein	K22771 flavonol-3-O-L-rhamnoside-7-O-glucosyltransferase [EC:2.4.1.-] | (RefSeq) UDP-glycosyltransferase 73C6 (A)	ko00944: Flavone and flavonol biosynthesis	--	U73C6_ARATH RecName: Full=UDP-glycosyltransferase 73C6; EC=2.4.1.-; AltName: Full=Flavonol-3-O-glycoside-7-O-glucosyltransferase 1; AltName: Full=Zeatin O-glucosyltransferase 2;	A0A0P0UYV6_ORYSJ RecName: Full=Glycosyltransferase {ECO:0000256|RuleBase:RU362057}; EC=2.4.1.- {ECO:0000256|RuleBase:RU362057};	At2g36790	GO:0005783,endoplasmic reticulum; GO:0080043,quercetin 3-O-glucosyltransferase activity; GO:0080046,quercetin 4'-O-glucosyltransferase activity; GO:0080044,quercetin 7-O-glucosyltransferase activity; GO:0035251,UDP-glucosyltransferase activity; GO:0051555,flavonol biosynthetic process; GO:0003674,molecular_function; GO:0003824,catalytic activity; GO:0008194,UDP-glycosyltransferase activity; GO:00…
Os01g0179000	0.7506	0.4314	0.591	1.7815	2.0163	1.4142	1.30575	1.1902	1.4213	1.0102	0.9754	1.3898	22	13	17.5	56	92	57	47.5	49	46	48	44	64	1.5665	6.87521e-05	0.000630938	up	1.17317	0.00170115	0.00531726	up	0.97356	0.0244813	0.063629	false	1	4110402	4112126	-	OsAT6	Transferase family protein	K19861 benzyl alcohol O-benzoyltransferase [EC:2.3.1.196 2.3.1.232] | (RefSeq) benzyl alcohol O-benzoyltransferase (A)	--	--	AT7_ORYSJ RecName: Full=Acyl transferase 7 {ECO:0000305}; Short=OsAT7 {ECO:0000303|PubMed:23391577}; EC=2.3.1.- {ECO:0000305};	Q7F766_ORYSJ SubName: Full=3'-N-debenzoyltaxol N-benzoyltransferase-like {ECO:0000313|EMBL:BAB63477.1}; SubName: Full=Os01g0179000 protein {ECO:0000313|EMBL:BAF04110.1};	At3g62160	GO:0016410,N-acyltransferase activity; GO:0003674,molecular_function; GO:0003824,catalytic activity; GO:0016740,transferase activity; GO:0016746,transferase activity, transferring acyl groups; GO:0016747,transferase activity, transferring acyl groups other than amino-acyl groups
Os01g0182300	5.3143	4.3978	4.85605	8.7272	6.4707	7.3253	12.5506	12.0282	13.073	7.2415	10.3072	10.8037	67	57	62	118	127	127	197.5	213	182	148	200	214	0.645733	0.011349	0.0451955	false	1.4114	7.10861e-13	8.47498e-12	up	1.01774	0.000110299	0.000619457	up	1	4318039	4318780	-	Os01g0182300	Lipocalin domain containing protein	--	--	--	--	Q5VR88_ORYSJ SubName: Full=Os01g0182300 protein {ECO:0000313|EMBL:BAS70740.1}; SubName: Full=cDNA clone:001-107-F11, full insert sequence {ECO:0000313|EMBL:BAG88456.1};	--	--
Os01g0182832	2.8652	7.3942	5.1297	2.3445	4.0941	4.6987	2.72725	3.8924	1.5621	3.3365	1.1968	0.856	98	260	179	86	218	221	123	187	59	185	63	46	-0.447576	0.178835	0.351581	false	-0.846825	0.0132292	0.0320254	false	-1.472	0.00142003	0.00582886	down	1	4375261	4377273	+	Os01g0182832	Hypothetical conserved gene	K19026 spatacsin | (RefSeq) uncharacterized protein LOC4325331 isoform X1 (A)	--	--	--	A0A0P0UYY1_ORYSJ SubName: Full=Os01g0182832 protein {ECO:0000313|EMBL:BAS70746.1}; Flags: Fragment;	At4g39420	GO:0005737,cytoplasm; GO:0005575,cellular_component; GO:0005622,intracellular anatomical structure; GO:0110165,cellular anatomical entity
Os01g0183300	3.3125	2.7475	3.03	5.7942	8.3131	6.1247	5.25765	5.0274	5.4879	4.6253	7.4911	4.3474	129	110	119.5	242	504	328	255.5	275	236	292	449	266	1.17564	6.37741e-09	1.39759e-07	up	0.833953	4.21658e-07	2.59474e-06	false	0.907533	0.000260585	0.00132139	false	1	4402668	4407292	-	Os01g0183300	Endonuclease/exonuclease/phosphatase domain containing protein	K24221 type I inositol polyphosphate 5-phosphatase IP5P1/2 [EC:3.1.3.56] | (RefSeq) type I inositol polyphosphate 5-phosphatase 2 isoform X1 (A)	ko00562: Inositol phosphate metabolism; ko01100: Metabolic pathways	--	IP5P3_ARATH RecName: Full=Type IV inositol polyphosphate 5-phosphatase 3 {ECO:0000305}; Short=At5PTase3 {ECO:0000305}; EC=3.1.3.36 {ECO:0000269|PubMed:21677096}; EC=3.1.3.86 {ECO:0000269|PubMed:21677096};	B9ETI3_ORYSJ SubName: Full=Os01g0183300 protein {ECO:0000313|EMBL:BAF04139.1}; SubName: Full=Putative inositol polyphosphate 5-phosphatase {ECO:0000313|EMBL:BAD67788.1};	At1g71710	GO:0034485,phosphatidylinositol-3,4,5-trisphosphate 5-phosphatase activity; GO:0004439,phosphatidylinositol-4,5-bisphosphate 5-phosphatase activity; GO:0046856,phosphatidylinositol dephosphorylation; GO:0003674,molecular_function; GO:0003824,catalytic activity; GO:0016787,hydrolase activity; GO:0016788,hydrolase activity, acting on ester bonds; GO:0016791,phosphatase activity; GO:0034594,phosphat…
Os01g0183600	3.6866	2.5614	3.124	8.7166	4.5248	5.4815	7.99415	7.8506	8.1377	6.2945	7.6779	6.7251	112	80	96	284	214	229	304	335	273	310	359	321	1.01901	0.00026975	0.00206878	up	1.39819	2.54556e-15	3.71788e-14	up	1.19771	9.17608e-09	1.22402e-07	up	1	4421318	4423105	+	OsCYP96E1	Cytochrome P450 family protein	K15402 fatty acid omega-hydroxylase [EC:1.14.-.-] | (RefSeq) cytochrome P450 86B1 (A)	ko00073: Cutin, suberine and wax biosynthesis	--	C96AF_ARATH RecName: Full=Alkane hydroxylase MAH1 {ECO:0000303|PubMed:17905869}; EC=1.14.-.- {ECO:0000305|PubMed:17905869}; AltName: Full=Cytochrome P450 96A15 {ECO:0000305}; AltName: Full=Protein MID-CHAIN ALKANE HYDROXYLASE 1 {ECO:0000303|PubMed:17905869};	Q9LGS7_ORYSJ SubName: Full=Os01g0183600 protein {ECO:0000313|EMBL:BAS70753.1}; SubName: Full=cDNA clone:002-172-C07, full insert sequence {ECO:0000313|EMBL:BAG99058.1};	At4g39480	GO:0005783,endoplasmic reticulum; GO:0005789,endoplasmic reticulum membrane; GO:0016021,integral component of membrane; GO:0020037,heme binding; GO:0005506,iron ion binding; GO:0080133,midchain alkane hydroxylase activity; GO:0010025,wax biosynthetic process; GO:0003674,molecular_function; GO:0005488,binding; GO:0046906,tetrapyrrole binding; GO:0097159,organic cyclic compound binding; GO:1901363,…
Os01g0183850	2.232	1.9426	2.0873	0.5477	0.4528	0.2563	0.5319	0	1.0638	1.8841	0.6106	0.4486	19	17	18	5	6	3	5	0	10	26	8	6	-2.31183	0.000659848	0.0043983	down	-2.02455	0.00810693	0.0210602	down	-1.0434	0.115379	0.216724	false	1	4438266	4438766	+	Os01g0183850	Conserved hypothetical protein	--	--	--	--	A0A0P0UZN4_ORYSJ SubName: Full=Os01g0183850 protein {ECO:0000313|EMBL:BAS70757.1};	--	GO:0016021,integral component of membrane; GO:0005575,cellular_component; GO:0016020,membrane; GO:0031224,intrinsic component of membrane; GO:0110165,cellular anatomical entity
Os01g0185900	1.3333	3.3348	2.33405	0.2368	0.1427	0.6694	0.1705	0.226	0.115	0.7833	0.3919	0.2223	42	108	75	8	7	29	7	10	4	40	19	11	-2.72218	3.76342e-07	5.97827e-06	down	-3.69514	1.91324e-14	2.61045e-13	down	-2.27857	3.95821e-06	3.10981e-05	down	1	4566304	4568589	+	OsWRKY107	Similar to WRKY 1 (Fragment)	K13424 WRKY transcription factor 33 | (RefSeq) probable WRKY transcription factor 33 (A)	ko04016: MAPK signaling pathway - plant; ko04626: Plant-pathogen interaction	--	WRK72_ARATH RecName: Full=Probable WRKY transcription factor 72; AltName: Full=WRKY DNA-binding protein 72;	A0A0P0UZQ7_ORYSJ SubName: Full=Os01g0185900 protein {ECO:0000313|EMBL:BAF04156.1}; SubName: Full=WRKY transcription factor 6-like {ECO:0000313|EMBL:BAD67800.1};	At5g15130	GO:0005634,nucleus; GO:0003700,DNA-binding transcription factor activity; GO:0043565,sequence-specific DNA binding; GO:0006952,defense response; GO:0003674,molecular_function; GO:0140110,transcription regulator activity; GO:0003676,nucleic acid binding; GO:0003677,DNA binding; GO:0005488,binding; GO:0097159,organic cyclic compound binding; GO:1901363,heterocyclic compound binding; GO:0006950,resp…
Os01g0186000	4.3287	4.0487	4.1887	3.4153	2.7806	2.2398	2.0143	1.5409	2.4877	2.3621	2.488	1.8014	52	50	51	44	52	37	29.5	26	33	46	46	34	-0.560625	0.0869504	0.212658	false	-1.02849	0.00142013	0.00453446	down	-0.866162	0.00727967	0.0233606	false	1	4572565	4573271	-	OsWRKY10	Similar to WRKY transcription factor 10	K13424 WRKY transcription factor 33 | (RefSeq) probable WRKY transcription factor 33 (A)	ko04016: MAPK signaling pathway - plant; ko04626: Plant-pathogen interaction	--	WRK50_ARATH RecName: Full=Probable WRKY transcription factor 50; AltName: Full=WRKY DNA-binding protein 50;	A0A0P0UZM3_ORYSJ SubName: Full=Os01g0186000 protein {ECO:0000313|EMBL:BAS70781.1}; Flags: Fragment;	At5g26170	GO:0005634,nucleus; GO:0003700,DNA-binding transcription factor activity; GO:0043565,sequence-specific DNA binding; GO:0050832,defense response to fungus; GO:0009867,jasmonic acid mediated signaling pathway; GO:0003674,molecular_function; GO:0140110,transcription regulator activity; GO:0003676,nucleic acid binding; GO:0003677,DNA binding; GO:0005488,binding; GO:0097159,organic cyclic compound bin…
Os01g0186600	1.8254	2.6328	2.2291	0.8217	2.1834	1.3274	0.3605	0.493	0.228	2.1356	0.5726	0.8814	29	43	36	14	54	29	7.5	11	4	55	14	22	-0.591687	0.184103	0.358203	false	-2.51218	1.7867e-07	1.16044e-06	down	-0.850408	0.102582	0.19811	false	1	4614891	4615825	+	Os01g0186600	Conserved hypothetical protein	--	--	--	--	Q5VRW8_ORYSJ SubName: Full=Os01g0186600 protein {ECO:0000313|EMBL:BAS70786.1}; SubName: Full=cDNA clone:002-139-E05, full insert sequence {ECO:0000313|EMBL:BAG98295.1};	--	GO:0016021,integral component of membrane; GO:0005575,cellular_component; GO:0016020,membrane; GO:0031224,intrinsic component of membrane; GO:0110165,cellular anatomical entity
Os01g0187200	4.6088	3.8106	4.2097	0.1719	0.0888	3.1504	0.1983	0.2297	0.1669	0.1422	0	0	100	85	92.5	4	3	94	5.5	7	4	5	0	0	-1.87643	0.163443	0.331488	false	-4.2976	1.67874e-23	4.12674e-22	down	-6.38537	1.16187e-18	5.582e-17	down	1	4665786	4667062	+	Os01g0187200	Non-protein coding transcript	--	--	--	--	A0A0Q3FXT0_BRADI SubName: Full=Uncharacterized protein {ECO:0000313|EMBL:KQK03093.1, ECO:0000313|EnsemblPlants:KQK03093};	--	--
Os01g0187300	4.3407	2.967	3.65385	0.0729	0.201	4.1519	0.09485	0.0835	0.1062	0.0965	0	0.0996	111	78	94.5	2	8	146	3	3	3	4	0	4	-1.29801	0.366928	0.564094	false	-5.24231	2.17608e-21	4.78675e-20	down	-5.73504	3.37767e-21	2.06878e-19	down	1	4667309	4669037	+	Os01g0187300	Hypothetical conserved gene	--	--	--	--	B8ADN6_ORYSI SubName: Full=Uncharacterized protein {ECO:0000313|EMBL:EEC70083.1};	--	GO:0016021,integral component of membrane; GO:0005575,cellular_component; GO:0016020,membrane; GO:0031224,intrinsic component of membrane; GO:0110165,cellular anatomical entity
Os01g0187600	1.2105	1.2092	1.20985	0.2135	0.0841	0.2617	0.07625	0.0932	0.0593	0.0404	0.9565	0.2499	37	38	37.5	7	4	11	3	4	2	2	45	12	-2.71147	3.15469e-07	5.07681e-06	down	-3.92203	8.73473e-11	8.53686e-10	down	-1.49356	0.0504936	0.114013	false	1	4697238	4699036	-	OsCKX1	Similar to Cytokinin dehydrogenase 1	K00279 cytokinin dehydrogenase [EC:1.5.99.12] | (RefSeq) cytokinin dehydrogenase 1 (A)	ko00908: Zeatin biosynthesis; ko01110: Biosynthesis of secondary metabolites	--	CKX1_ORYSJ RecName: Full=Cytokinin dehydrogenase 1; EC=1.5.99.12; AltName: Full=Cytokinin oxidase 1; Short=OsCKX1; Flags: Precursor;	A0A0P0UZ77_ORYSJ SubName: Full=Os01g0187600 protein {ECO:0000313|EMBL:BAS70797.1}; Flags: Fragment;	At1g75450	GO:0005615,extracellular space; GO:0019139,cytokinin dehydrogenase activity; GO:0071949,FAD binding; GO:0016491,oxidoreductase activity; GO:0009690,cytokinin metabolic process; GO:0003674,molecular_function; GO:0003824,catalytic activity; GO:0016645,oxidoreductase activity, acting on the CH-NH group of donors; GO:0000166,nucleotide binding; GO:0005488,binding; GO:0036094,small molecule binding; G…
Os01g0189700	0.4601	0.7192	0.58965	0.4137	0.7916	0.4182	0.23495	0.1872	0.2827	0.3446	0.2028	0.0523	28	45	36.5	27	75	35	17.5	16	19	34	19	5	-0.0890099	0.827692	0.911068	false	-1.28675	0.00123114	0.00398921	down	-1.51093	0.0101896	0.0310248	down	1	4789656	4795346	+	Os01g0189700	Similar to cDNA clone:001-031-C06%2C full insert sequence	K24194 boron transporter | (RefSeq) uncharacterized protein LOC4326215 (A)	--	--	--	A0A0E0FHE7_ORYNI RecName: Full=ANK_REP_REGION domain-containing protein {ECO:0000259|PROSITE:PS50297};	--	--
Os01g0190300	6.8718	5.7248	6.2983	11.4967	7.7088	8.5836	16.543	17.2754	15.8106	9.5124	9.0152	14.9001	209	179	194	375	365	359	634.5	738	531	469	422	712	0.575933	0.0036089	0.0184251	false	1.43862	7.25348e-30	2.43798e-28	up	0.881925	0.000113291	0.000634587	false	1	4816831	4818958	+	OsIAA2	Similar to Auxin-responsive protein IAA26 (Indoleacetic acid-induced protein 26) (Phytochrome-associated protein 1)	K14484 auxin-responsive protein IAA | (RefSeq) auxin-responsive protein IAA2 (A)	ko04075: Plant hormone signal transduction	--	IAA2_ORYSJ RecName: Full=Auxin-responsive protein IAA2; AltName: Full=Indoleacetic acid-induced protein 2;	A0A0E0MSG9_ORYRU RecName: Full=Auxin-responsive protein {ECO:0000256|RuleBase:RU004549};	At3g16500	GO:0005634,nucleus; GO:0009734,auxin-activated signaling pathway; GO:0006355,regulation of transcription, DNA-templated; GO:0009733,response to auxin; GO:0007154,cell communication; GO:0007165,signal transduction; GO:0008150,biological_process; GO:0009719,response to endogenous stimulus; GO:0009725,response to hormone; GO:0009755,hormone-mediated signaling pathway; GO:0009987,cellular process; GO…
Os01g0191200	23.028	31.3164	27.1722	31.9603	31.6322	21.7695	27.4133	38.4644	16.3622	10.6812	9.3513	7.4693	520	727	623.5	774	1112	676	814	1220	408	391	325	265	0.0875179	0.625095	0.781386	false	0.0715792	0.83944	0.889804	false	-1.51717	4.39296e-19	2.2009e-17	down	1	4872158	4873806	-	Os01g0191200	Similar to Acid phosphatase	--	--	--	VSPA_SOYBN RecName: Full=Stem 28 kDa glycoprotein; AltName: Full=Vegetative storage protein A; Flags: Precursor;	Q0JPZ5_ORYSJ SubName: Full=Os01g0191200 protein {ECO:0000313|EMBL:BAF04183.1}; SubName: Full=Putative acid phosphatase {ECO:0000313|EMBL:BAA99433.1};	At4g29260	GO:0045735,nutrient reservoir activity; GO:0003674,molecular_function
Os01g0191400	0.5807	0.706	0.64335	0.0967	0.2797	0.2111	0.2382	0.251	0.2254	0.3198	0.0808	0.0924	28	35	31.5	5	21	14	14.5	17	12	25	6	7	-1.67452	0.000874435	0.00559269	down	-1.41111	0.000559155	0.00196923	down	-1.92777	0.00108017	0.00458324	down	1	4887954	4891334	-	Os01g0191400	Hypothetical protein	--	--	--	--	I1NL11_ORYGL SubName: Full=Uncharacterized protein {ECO:0000313|EnsemblPlants:ORGLA01G0055100.1};	--	--
Os01g0192550	2.8202	2.1586	2.4894	2.3279	1.6928	1.0086	1.0754	1.0204	1.1304	2.1675	1.1114	1.1476	61	48	54.5	54	57	30	29	31	27	76	37	39	-0.551178	0.139624	0.297762	false	-1.16918	0.000164913	0.000650735	down	-0.700303	0.0573638	0.125822	false	1	4980670	4981942	+	Os01g0192550	Conserved hypothetical protein	--	--	--	--	A0A0P0UZ58_ORYSJ SubName: Full=Os01g0192550 protein {ECO:0000313|EMBL:BAH90947.1};	--	GO:0016021,integral component of membrane; GO:0005575,cellular_component; GO:0016020,membrane; GO:0031224,intrinsic component of membrane; GO:0110165,cellular anatomical entity
Os01g0194600	98.616	69.0045	83.8102	144.952	74.4849	119.16	202.788	161.93	243.646	176.826	257.436	229.16	1126	810	968	1775	1324	1871	2834.5	2597	3072	3273	4524	4111	0.452472	0.0372593	0.114365	false	1.30921	1.26339e-14	1.74411e-13	up	1.45555	1.53716e-16	5.95446e-15	up	1	5085833	5086504	+	OsGRX2	Thioredoxin fold domain containing protein	K03676 glutaredoxin 3 | (RefSeq) monothiol glutaredoxin-S2 (A)	--	--	GRXS2_ORYSJ RecName: Full=Monothiol glutaredoxin-S2;	I1NL35_ORYGL RecName: Full=Glutaredoxin domain-containing protein {ECO:0000259|PROSITE:PS51354};	At5g11930	GO:0005737,cytoplasm; GO:0051537,2 iron, 2 sulfur cluster binding; GO:0046872,metal ion binding; GO:0015035,protein disulfide oxidoreductase activity; GO:0003674,molecular_function; GO:0005488,binding; GO:0051536,iron-sulfur cluster binding; GO:0051540,metal cluster binding; GO:0043167,ion binding; GO:0043169,cation binding; GO:0003824,catalytic activity; GO:0015036,disulfide oxidoreductase activ…
Os01g0195400	14.6793	6.8947	10.787	7.2914	7.138	15.8956	16.7672	14.1949	19.3395	29.3093	25.2852	50.3825	321	155	238	171	243	478	451.5	436	467	1039	851	1731	-0.0751932	0.818227	0.905975	false	0.672841	0.00453078	0.012645	false	1.75752	0.000121078	0.000674494	up	1	5131629	5132915	-	Os01g0195400	Harpin-induced 1 domain containing protein	--	--	--	NHL6_ARATH RecName: Full=NDR1/HIN1-like protein 6 {ECO:0000303|PubMed:26849212};	Q5SNJ9_ORYSJ RecName: Full=LEA_2 domain-containing protein {ECO:0000259|Pfam:PF03168};	At1g17620	GO:0005829,cytosol; GO:0016021,integral component of membrane; GO:0005886,plasma membrane; GO:0009738,abscisic acid-activated signaling pathway; GO:0010116,positive regulation of abscisic acid biosynthetic process; GO:0009737,response to abscisic acid; GO:0006970,response to osmotic stress; GO:1902074,response to salt; GO:0007154,cell communication; GO:0007165,signal transduction; GO:0008150,biol…
Os01g0196300	10.3979	12.1436	11.2707	0.1569	0.281	1.1256	0.2689	0.2635	0.2743	1.4738	0.3935	0.6639	309	371	340	5	13	46	10	11	9	71	18	31	-4.41605	5.79058e-09	1.28342e-07	down	-5.3521	4.38127e-70	5.132e-68	down	-3.68886	1.40777e-27	1.32813e-25	down	1	5201862	5203996	+	DPF	Basic helix-loop-helix (bHLH) transcription factor%2C Diterpenoid phytoalexin factor%2C Biosynthesis of diterpenoid phytoalexins%2C Stress respons	K13422 transcription factor MYC2 | (RefSeq) transcription factor MYC2 (A)	ko04016: MAPK signaling pathway - plant; ko04075: Plant hormone signal transduction	--	BH041_ARATH RecName: Full=Putative transcription factor bHLH041; AltName: Full=Basic helix-loop-helix protein 41; Short=AtbHLH41; Short=bHLH 41; AltName: Full=Transcription factor EN 51; AltName: Full=bHLH transcription factor bHLH041;	Q5SMX4_ORYSJ SubName: Full=BHLH transcription factor {ECO:0000313|EMBL:ADX60282.1}; SubName: Full=Os01g0196300 protein {ECO:0000313|EMBL:BAS70864.1}; SubName: Full=cDNA clone:J033115I17, full insert sequence {ECO:0000313|EMBL:BAG95806.1};	At5g56960	GO:0005634,nucleus; GO:0003677,DNA binding; GO:0003700,DNA-binding transcription factor activity; GO:0046983,protein dimerization activity; GO:0006355,regulation of transcription, DNA-templated; GO:0010200,response to chitin; GO:0003674,molecular_function; GO:0003676,nucleic acid binding; GO:0005488,binding; GO:0097159,organic cyclic compound binding; GO:1901363,heterocyclic compound binding; GO:…
Os01g0197700	38.0757	52.5286	45.3021	2.4538	3.6097	13.0369	2.69085	3.3958	1.9859	3.0099	2.1907	1.5005	1389	1970	1679.5	96	205	654	127	174	80	178	123	86	-2.81914	8.0691e-05	0.000724855	down	-4.0099	5.8862e-123	1.9422e-120	down	-4.2928	5.70188e-96	8.89379e-93	down	1	5270449	5275585	-	Gn1a	Cytokinin oxidase/dehydrogenase%2C Regulation of grain productio	K00279 cytokinin dehydrogenase [EC:1.5.99.12] | (RefSeq) cytokinin dehydrogenase 2 (A)	ko00908: Zeatin biosynthesis; ko01110: Biosynthesis of secondary metabolites	--	CKX2_ORYSJ RecName: Full=Cytokinin dehydrogenase 2; EC=1.5.99.12; AltName: Full=Cytokinin oxidase 2; Short=OsCKX2; AltName: Full=QTL grain number 1a; Short=Gn1a; Flags: Precursor;	A0A2R4SUF6_9LAMI RecName: Full=Cytokinin dehydrogenase {ECO:0000256|ARBA:ARBA00011928}; EC=1.5.99.12 {ECO:0000256|ARBA:ARBA00011928};	At5g56970	GO:0005615,extracellular space; GO:0019139,cytokinin dehydrogenase activity; GO:0071949,FAD binding; GO:0016491,oxidoreductase activity; GO:0009690,cytokinin metabolic process; GO:0009736,cytokinin-activated signaling pathway; GO:0010229,inflorescence development; GO:0003674,molecular_function; GO:0003824,catalytic activity; GO:0016645,oxidoreductase activity, acting on the CH-NH group of donors;…
Os01g0199300	2.1749	3.2054	2.69015	1.1062	0.7197	0.9106	0.96585	0.7977	1.134	1.0977	1.199	0.5453	33	50	41.5	18	17	19	18	17	19	27	28	13	-1.56113	0.000192509	0.00155275	down	-1.46069	0.000112821	0.000460944	down	-1.46299	0.000738829	0.00328202	down	1	5384196	5385088	+	Os01g0199300	Similar to lachrymatory factor synthase	--	--	--	--	Q4VWZ2_ORYSJ SubName: Full=Os01g0199300 protein {ECO:0000313|EMBL:BAS70887.1};	At2g25770	GO:0005634,nucleus; GO:0005575,cellular_component; GO:0005622,intracellular anatomical structure; GO:0043226,organelle; GO:0043227,membrane-bounded organelle; GO:0043229,intracellular organelle; GO:0043231,intracellular membrane-bounded organelle; GO:0110165,cellular anatomical entity
Os01g0203400	5.3173	3.33	4.32365	9.3727	12.0246	8.0512	12.9195	9.2825	16.5565	5.6615	8.3768	10.2921	73	47	60	138	257	152	215	179	251	126	177	222	1.20719	7.7453e-06	9.18399e-05	up	1.60824	2.37331e-09	1.96187e-08	up	0.966933	0.00208945	0.00810323	false	1	5685594	5686401	+	OsCEP7	Hypothetical protein	--	--	--	--	Q7F6P5_ORYSJ SubName: Full=Os01g0203400 protein {ECO:0000313|EMBL:BAF04246.1};	--	GO:0016021,integral component of membrane; GO:0005575,cellular_component; GO:0016020,membrane; GO:0031224,intrinsic component of membrane; GO:0110165,cellular anatomical entity
Os01g0207900	1.275	0.9922	1.1336	1.7595	3.0794	2.4848	2.84315	3.8851	1.8012	1.982	2.6841	1.8827	25	20	22.5	37	94	67	73	107	39	63	81	58	1.14512	0.00277872	0.0148582	up	1.40346	0.000118273	0.000481121	up	1.0093	0.00662195	0.0215966	up	1	5856444	5857920	+	OsUMAMIT3	Similar to nodulin-like protein	--	--	--	WTR45_ARATH RecName: Full=WAT1-related protein At5g64700;	A0A0P0UZM2_ORYSJ RecName: Full=WAT1-related protein {ECO:0000256|RuleBase:RU363077};	At5g64700	GO:0016021,integral component of membrane; GO:0005886,plasma membrane; GO:0022857,transmembrane transporter activity; GO:0003674,molecular_function; GO:0005215,transporter activity; GO:0005575,cellular_component; GO:0016020,membrane; GO:0031224,intrinsic component of membrane; GO:0110165,cellular anatomical entity; GO:0071944,cell periphery
Os01g0208000	1.5831	1.2682	1.42565	4.0811	2.632	2.4379	3.3502	3.5801	3.1203	2.6425	2.2992	2.0152	17	14	15.5	47	44	36	45.5	54	37	46	38	34	1.09712	0.0146541	0.0554013	false	1.27107	0.000664537	0.00230025	up	0.739006	0.0918458	0.181911	false	1	5862946	5863577	+	OsUMAMIT4	Protein of unknown function DUF6%2C transmembrane domain containing protein	--	--	--	WTR45_ARATH RecName: Full=WAT1-related protein At5g64700;	C7IXZ2_ORYSJ SubName: Full=Os01g0208133 protein {ECO:0000313|EMBL:BAH90956.1};	At5g64700	GO:0016021,integral component of membrane; GO:0005886,plasma membrane; GO:0022857,transmembrane transporter activity; GO:0003674,molecular_function; GO:0005215,transporter activity; GO:0005575,cellular_component; GO:0016020,membrane; GO:0031224,intrinsic component of membrane; GO:0110165,cellular anatomical entity; GO:0071944,cell periphery
Os01g0210600	210.449	133.101	171.775	74.9478	68.6179	154.155	79.7022	77.1468	82.2575	88.6955	78.9969	82.1211	3422	2225	2823.5	1307	1737	3447	1619.5	1762	1477	2338	1977	2098	-0.774226	0.075573	0.191974	false	-1.06656	1.16204e-12	1.35776e-11	down	-0.992244	7.25084e-10	1.16357e-08	false	1	6010862	6011818	-	Os01g0210600	Protein of unknown function DUF538 family protein	--	--	--	--	A0A0N7KCJ4_ORYSJ SubName: Full=Os01g0210600 protein {ECO:0000313|EMBL:BAF04283.1};	At5g46230	--
Os01g0212700	1.9731	2.0837	2.0284	1.1564	0.7604	1.1888	3.18955	2.4482	3.9309	2.782	4.1756	4.808	35	38	36.5	22	21	29	69	61	77	80	114	134	-0.953508	0.0177387	0.0643873	false	0.684992	0.0235685	0.05242	false	1.01554	0.00206927	0.00804366	up	1	6172143	6173186	-	Os01g0212700	Similar to RING-H2 finger protein ATL2K	K16286 E3 ubiquitin-protein ligase EL5 [EC:2.3.2.27] | (RefSeq) E3 ubiquitin-protein ligase EL5-like (A)	--	--	ATL41_ARATH RecName: Full=E3 ubiquitin-protein ligase ATL41; EC=2.3.2.27 {ECO:0000269|PubMed:15644464, ECO:0000269|PubMed:16339806}; AltName: Full=RING-H2 finger protein ATL41; AltName: Full=RING-type E3 ubiquitin transferase ATL41 {ECO:0000305};	A0A0P0V031_ORYSJ SubName: Full=Os01g0212700 protein {ECO:0000313|EMBL:BAS71000.1}; Flags: Fragment;	At2g42360	GO:0016021,integral component of membrane; GO:0046872,metal ion binding; GO:0004842,ubiquitin-protein transferase activity; GO:0016567,protein ubiquitination; GO:0003674,molecular_function; GO:0005488,binding; GO:0043167,ion binding; GO:0043169,cation binding; GO:0003824,catalytic activity; GO:0016740,transferase activity; GO:0019787,ubiquitin-like protein transferase activity; GO:0140096,catalyt…
Os01g0213400	10.4439	9.9198	10.1819	4.4681	3.5516	3.5293	2.24795	2.4931	2.0028	3.1454	2.2353	3.2454	170	166	168	78	90	79	46.5	57	36	83	56	83	-1.39019	6.55917e-11	1.90763e-09	down	-2.13072	3.81691e-24	9.60458e-23	down	-1.76907	8.18904e-15	2.60325e-13	down	1	6199245	6200202	-	OsRFPH2-8	Zinc finger%2C RING/FYVE/PHD-type domain containing protein	K19038 E3 ubiquitin-protein ligase ATL41 [EC:2.3.2.27] | (RefSeq) RING-H2 finger protein ATL39 (A)	--	--	ATL41_ARATH RecName: Full=E3 ubiquitin-protein ligase ATL41; EC=2.3.2.27 {ECO:0000269|PubMed:15644464, ECO:0000269|PubMed:16339806}; AltName: Full=RING-H2 finger protein ATL41; AltName: Full=RING-type E3 ubiquitin transferase ATL41 {ECO:0000305};	Q0JPN2_ORYSJ RecName: Full=RING-type E3 ubiquitin transferase {ECO:0000256|ARBA:ARBA00012483}; EC=2.3.2.27 {ECO:0000256|ARBA:ARBA00012483};	At2g42360	GO:0016021,integral component of membrane; GO:0046872,metal ion binding; GO:0004842,ubiquitin-protein transferase activity; GO:0016567,protein ubiquitination; GO:0003674,molecular_function; GO:0005488,binding; GO:0043167,ion binding; GO:0043169,cation binding; GO:0003824,catalytic activity; GO:0016740,transferase activity; GO:0019787,ubiquitin-like protein transferase activity; GO:0140096,catalyt…
Os01g0214500	22.5608	22.5812	22.571	16.6665	14.2819	10.7789	7.2665	5.354	9.179	12.6396	15.7916	11.4459	207	213	210	164	204	136	81	69	93	188	223	165	-0.680635	0.00089606	0.00569673	false	-1.61546	3.46522e-14	4.58642e-13	down	-0.711714	0.00012432	0.000690412	false	1	6257846	6258501	+	Os01g0214500	Conserved hypothetical protein	--	--	--	TAX1_ARATH RecName: Full=Signaling peptide TAXIMIN 1 {ECO:0000303|PubMed:26071531}; Flags: Precursor;	Q5QNJ2_ORYSJ SubName: Full=Os01g0214500 protein {ECO:0000313|EMBL:BAS71011.1}; SubName: Full=cDNA clone:001-103-G08, full insert sequence {ECO:0000313|EMBL:BAG88336.1};	--	GO:0005615,extracellular space; GO:0005886,plasma membrane; GO:0048530,fruit morphogenesis; GO:0010199,organ boundary specification between lateral organs and the meristem; GO:0009416,response to light stimulus; GO:0000003,reproduction; GO:0003006,developmental process involved in reproduction; GO:0007275,multicellular organism development; GO:0008150,biological_process; GO:0009653,anatomical str…
Os01g0214600	46.3499	31.5027	38.9263	25.9231	12.5035	48.2846	47.1213	39.5863	54.6564	60.4487	52.7828	118.002	1112	777	944.5	667	467	1593	1391	1334	1448	2351	1949	4448	-0.410835	0.458665	0.648956	false	0.311654	0.0584008	0.111668	false	1.04747	0.0163882	0.0458983	up	1	6267440	6270770	+	OsGELP2	Lipase%2C GDSL domain containing protein	--	--	--	GDL83_ARATH RecName: Full=GDSL esterase/lipase At5g45910; EC=3.1.1.-; AltName: Full=Extracellular lipase At5g45910; Flags: Precursor;	Q5QN46_ORYSJ SubName: Full=Os01g0214600 protein {ECO:0000313|EMBL:BAF04304.1}; SubName: Full=Putative esterase {ECO:0000313|EMBL:BAD73162.1};	At5g45910	GO:0005576,extracellular region; GO:0016788,hydrolase activity, acting on ester bonds; GO:0016042,lipid catabolic process; GO:0003674,molecular_function; GO:0003824,catalytic activity; GO:0016787,hydrolase activity; GO:0006629,lipid metabolic process; GO:0008150,biological_process; GO:0008152,metabolic process; GO:0009056,catabolic process; GO:0044238,primary metabolic process; GO:0071704,organic…
Os01g0215000	6.1856	3.8047	4.99515	8.185	4.7037	5.6227	8.56355	7.9009	9.2262	9.3148	12.589	13.8953	136	86	111	193	161	170	234	244	224	332	426	480	0.324043	0.243237	0.431173	false	0.816665	6.37123e-05	0.000273497	false	1.31414	7.48603e-08	8.43287e-07	up	1	6288365	6292301	+	OsGELP4	Lipase%2C GDSL domain containing protein	--	--	--	GDL8_ARATH RecName: Full=GDSL esterase/lipase At1g28590; EC=3.1.1.-; AltName: Full=Extracellular lipase At1g28590; Flags: Precursor;	Q0JPM1_ORYSJ SubName: Full=Os01g0215000 protein {ECO:0000313|EMBL:BAS71017.1}; Flags: Fragment;	At1g28590	GO:0005576,extracellular region; GO:0016788,hydrolase activity, acting on ester bonds; GO:0016042,lipid catabolic process; GO:0003674,molecular_function; GO:0003824,catalytic activity; GO:0016787,hydrolase activity; GO:0006629,lipid metabolic process; GO:0008150,biological_process; GO:0008152,metabolic process; GO:0009056,catabolic process; GO:0044238,primary metabolic process; GO:0071704,organic…
Os01g0215700	0.1604	0.312	0.2362	0.1196	0.1648	0.07	0.81555	0.7307	0.9004	0.277	0.1459	1.1228	5	10	7.5	4	8	3	31.5	32	31	14	7	55	NA	NA	NA	NA	1.79497	0.00030559	0.00113982	up	NA	NA	NA	NA	1	6319130	6322451	+	OsGELP6	Esterase%2C SGNH hydrolase-type domain containing protein	--	--	--	GDL83_ARATH RecName: Full=GDSL esterase/lipase At5g45910; EC=3.1.1.-; AltName: Full=Extracellular lipase At5g45910; Flags: Precursor;	Q0JPL8_ORYSJ SubName: Full=Os01g0215700 protein {ECO:0000313|EMBL:BAS71022.1}; SubName: Full=cDNA clone:001-022-B07, full insert sequence {ECO:0000313|EMBL:BAG86888.1}; SubName: Full=cDNA clone:006-207-F05, full insert sequence {ECO:0000313|EMBL:BAG87737.1};	At5g45910	GO:0005576,extracellular region; GO:0016788,hydrolase activity, acting on ester bonds; GO:0016042,lipid catabolic process; GO:0003674,molecular_function; GO:0003824,catalytic activity; GO:0016787,hydrolase activity; GO:0006629,lipid metabolic process; GO:0008150,biological_process; GO:0008152,metabolic process; GO:0009056,catabolic process; GO:0044238,primary metabolic process; GO:0071704,organic…
Os01g0217100	1.0974	0.7865	0.94195	1.4541	1.2243	0.588	1.8479	1.6037	2.0921	2.1733	2.2891	1.9483	19	14	16.5	27	33	14	39.5	39	40	61	61	53	0.24133	0.651617	0.799411	false	1.02643	0.00864182	0.0222426	up	1.25028	0.00163293	0.00657247	up	1	6394270	6395665	+	Os01g0217100	Conserved hypothetical protein	--	--	--	PUP11_ARATH RecName: Full=Probable purine permease 11; Short=AtPUP11;	Q0JPL1_ORYSJ SubName: Full=Os01g0217100 protein {ECO:0000313|EMBL:BAF04317.1};	At1g44750	GO:0016021,integral component of membrane; GO:0016020,membrane; GO:0005345,purine nucleobase transmembrane transporter activity; GO:0015211,purine nucleoside transmembrane transporter activity; GO:0006863,purine nucleobase transport; GO:0003674,molecular_function; GO:0005215,transporter activity; GO:0008509,anion transmembrane transporter activity; GO:0015075,ion transmembrane transporter activit…
Os01g0217500	43.5618	58.1415	50.8516	14.8177	16.7224	16.3761	12.5667	14.6113	10.5221	23.1772	13.2049	15.3243	1091	1497	1294	398	652	564	402.5	514	291	941	509	603	-1.64978	1.12488e-35	2.57874e-33	down	-1.96491	2.37277e-44	1.41083e-42	down	-1.51104	1.20263e-14	3.73677e-13	down	1	6412786	6419867	+	OsDJ-1A	ThiJ/PfpI domain containing protein	K03152 protein deglycase [EC:3.5.1.124] | (RefSeq) protein DJ-1 homolog B (A)	--	--	DJ1B_ARATH RecName: Full=Protein DJ-1 homolog B; Short=AtDJ1B; Flags: Precursor;	Q5QNF2_ORYSJ SubName: Full=Os01g0217500 protein {ECO:0000313|EMBL:BAS71041.1}; SubName: Full=cDNA clone:001-113-B10, full insert sequence {ECO:0000313|EMBL:BAG88623.1};	At1g53280	GO:0009507,chloroplast; GO:0009570,chloroplast stroma; GO:0005829,cytosol; GO:0005634,nucleus; GO:0019172,glyoxalase III activity; GO:0036524,protein deglycase activity; GO:0106046,guanine deglycation, glyoxal removal; GO:0036529,protein deglycation, glyoxal removal; GO:0003674,molecular_function; GO:0003824,catalytic activity; GO:0016829,lyase activity; GO:0016835,carbon-oxygen lyase activity; G…
Os01g0218500	1.2594	1.1952	1.2273	0.6874	1.0359	0.7818	0.50735	0.667	0.3477	0.6158	0.7085	0.3617	82	80	81	48	105	70	43	61	25	65	71	37	-0.527166	0.0504442	0.143079	false	-1.20425	1.77928e-05	8.40048e-05	down	-1.07739	0.000524758	0.00243028	down	1	6494446	6499766	+	OsFTL1	Similar to ZCN14 protein	K16223 protein FLOWERING LOCUS T | (RefSeq) protein HEADING DATE 3B-like (A)	ko04712: Circadian rhythm - plant	--	RFT1_ORYSJ RecName: Full=Protein RICE FLOWERING LOCUS T 1 {ECO:0000305}; AltName: Full=FLOWERING LOCUS T-like protein 3 {ECO:0000305}; Short=FT-like protein 3 {ECO:0000305}; Short=OsFTL3;	A0A0P0UZQ4_ORYSJ SubName: Full=Os01g0218500 protein {ECO:0000313|EMBL:BAS71052.1}; Flags: Fragment;	At1g65480	GO:0005783,endoplasmic reticulum; GO:0005634,nucleus; GO:0008429,phosphatidylethanolamine binding; GO:0030154,cell differentiation; GO:0009908,flower development; GO:0010229,inflorescence development; GO:0048573,photoperiodism, flowering; GO:0009909,regulation of flower development; GO:0048510,regulation of timing of transition from vegetative to reproductive phase; GO:0010228,vegetative to repro…
Os01g0221600	0.9716	1.3085	1.14005	0.2439	0.4801	0.2174	0.11845	0	0.2369	0.1844	0.0971	0.1427	26	36	31	7	20	8	3.5	0	7	8	4	6	-1.81994	0.000423857	0.00303834	down	-3.29006	4.42644e-07	2.71547e-06	down	-2.95509	1.43413e-07	1.5245e-06	down	1	6659237	6662320	+	OsALMT4	Aluminum-activated malate transporter%2C Malate-permeable anion channel%2C Facilitation of malate efflux from cell	--	--	--	ALMT9_ARATH RecName: Full=Aluminum-activated malate transporter 9; Short=AtALMT9;	Q0JPI1_ORYSJ SubName: Full=Os01g0221600 protein {ECO:0000313|EMBL:BAF04347.1};	At3g18440	GO:0016021,integral component of membrane; GO:0009705,plant-type vacuole membrane; GO:0005253,anion channel activity; GO:0015743,malate transport; GO:0003674,molecular_function; GO:0005215,transporter activity; GO:0005216,ion channel activity; GO:0008509,anion transmembrane transporter activity; GO:0015075,ion transmembrane transporter activity; GO:0015103,inorganic anion transmembrane transporte…
Os01g0223900	0.491	0.6079	0.54945	0.5827	0.4731	0.3408	0.2672	0.4131	0.1213	0.1377	0.3045	0.071	22	28	25	28	33	21	16	26	6	10	21	5	-0.225553	0.606346	0.767966	false	-0.951874	0.0502726	0.0986793	false	-1.63652	0.00649098	0.0212316	down	1	6787094	6789730	+	Os01g0223900	Serine/threonine protein kinase-related domain containing protein	K13418 somatic embryogenesis receptor kinase 1 [EC:2.7.10.1 2.7.11.1] | (RefSeq) somatic embryogenesis receptor kinase 1 (A)	--	--	Y2913_ARATH RecName: Full=G-type lectin S-receptor-like serine/threonine-protein kinase At2g19130; EC=2.7.11.1; Flags: Precursor;	A2ZQU4_ORYSJ RecName: Full=Receptor-like serine/threonine-protein kinase {ECO:0000256|PIRNR:PIRNR000641}; EC=2.7.11.1 {ECO:0000256|PIRNR:PIRNR000641};	At2g19130	GO:0016021,integral component of membrane; GO:0005886,plasma membrane; GO:0005524,ATP binding; GO:0005516,calmodulin binding; GO:0030246,carbohydrate binding; GO:0106310,protein serine kinase activity; GO:0004674,protein serine/threonine kinase activity; GO:0106311,protein threonine kinase activity; GO:0048544,recognition of pollen; GO:0000166,nucleotide binding; GO:0003674,molecular_function; GO…
Os01g0224000	0.7059	0.8523	0.7791	0.227	0.1563	0.3717	0.14175	0.1733	0.1102	0.1501	0.1265	0.2014	29	36	32.5	10	10	21	7.5	10	5	10	8	13	-1.60863	0.00104108	0.00647953	down	-2.35142	8.63715e-07	5.0776e-06	down	-2.22651	5.18497e-06	3.96577e-05	down	1	6790903	6793320	-	Os01g0224000	Serine/threonine protein kinase-related domain containing protein	K13430 serine/threonine-protein kinase PBS1 [EC:2.7.11.1] | (RefSeq) serine/threonine-protein kinase PBS1 (A)	ko04626: Plant-pathogen interaction	--	Y2913_ARATH RecName: Full=G-type lectin S-receptor-like serine/threonine-protein kinase At2g19130; EC=2.7.11.1; Flags: Precursor;	A0A5S6RCP1_ORYSJ RecName: Full=Receptor-like serine/threonine-protein kinase {ECO:0000256|PIRNR:PIRNR000641}; EC=2.7.11.1 {ECO:0000256|PIRNR:PIRNR000641};	At2g19130	GO:0016021,integral component of membrane; GO:0005886,plasma membrane; GO:0005524,ATP binding; GO:0005516,calmodulin binding; GO:0030246,carbohydrate binding; GO:0106310,protein serine kinase activity; GO:0004674,protein serine/threonine kinase activity; GO:0106311,protein threonine kinase activity; GO:0048544,recognition of pollen; GO:0000166,nucleotide binding; GO:0003674,molecular_function; GO…
Os01g0224100	7.8429	6.7462	7.29455	0.967	1.5613	2.781	0.75395	1.0383	0.4696	0.4598	0.358	0.3919	242	214	228	32	75	118	30.5	45	16	23	17	19	-2.01767	2.92172e-11	8.91886e-10	down	-3.1972	4.1737e-39	2.08037e-37	down	-4.12224	1.97204e-53	6.68693e-51	down	1	6813719	6815534	+	OsERF#053	Similar to DNA binding protein-like protein	K09286 EREBP-like factor | (RefSeq) ethylene-responsive transcription factor 11 (A)	--	--	CRF2_ARATH RecName: Full=Ethylene-responsive transcription factor CRF2; AltName: Full=Protein CYTOKININ RESPONSE FACTOR 2;	Q5NAQ6_ORYSJ SubName: Full=Os01g0224100 protein {ECO:0000313|EMBL:BAS71098.1}; SubName: Full=cDNA clone:002-107-B02, full insert sequence {ECO:0000313|EMBL:BAG97749.1}; SubName: Full=cDNA clone:J033015K21, full insert sequence {ECO:0000313|EMBL:BAG94891.1};	At4g23750	GO:0005737,cytoplasm; GO:0005634,nucleus; GO:0003700,DNA-binding transcription factor activity; GO:0042802,identical protein binding; GO:0000976,transcription regulatory region sequence-specific DNA binding; GO:0048825,cotyledon development; GO:0009736,cytokinin-activated signaling pathway; GO:0009873,ethylene-activated signaling pathway; GO:0048364,root development; GO:0003674,molecular_function…
Os01g0224700	10.4429	14.0998	12.2713	0.6395	1.702	6.1432	0.2562	0.3995	0.1129	1.1922	0.1215	0.2579	335	465	400	22	85	271	11	18	4	62	6	13	-2.10652	0.0143697	0.0545642	false	-5.46013	9.53492e-72	1.14551e-69	down	-4.51157	2.39033e-07	2.43477e-06	down	1	6857345	6860952	+	YUCCA4	Flavin monooxygenase-like enzyme%2C Auxin biosynthesi	K11816 indole-3-pyruvate monooxygenase [EC:1.14.13.168] | (RefSeq) indole-3-pyruvate monooxygenase YUCCA2 (A)	ko00380: Tryptophan metabolism; ko01100: Metabolic pathways	--	YUC4_ORYSJ RecName: Full=Indole-3-pyruvate monooxygenase YUCCA4 {ECO:0000305}; Short=OsYUCCA4 {ECO:0000303|PubMed:29915329}; EC=1.14.13.168 {ECO:0000305|PubMed:29915329}; AltName: Full=Flavin-containing monooxygenase YUCCA4 {ECO:0000305};	A0A0D3EL91_9ORYZ RecName: Full=Flavin-containing monooxygenase {ECO:0000256|RuleBase:RU361177}; EC=1.-.-.- {ECO:0000256|RuleBase:RU361177};	At4g13260	GO:0050660,flavin adenine dinucleotide binding; GO:0103075,indole-3-pyruvate monooxygenase activity; GO:0004499,N,N-dimethylaniline monooxygenase activity; GO:0050661,NADP binding; GO:0009901,anther dehiscence; GO:0009851,auxin biosynthetic process; GO:0000166,nucleotide binding; GO:0003674,molecular_function; GO:0005488,binding; GO:0036094,small molecule binding; GO:0043167,ion binding; GO:00431…
Os01g0227800	0.7639	2.1054	1.43465	0.2078	0.2045	0.4629	0.0855	0.1133	0.0577	0.1964	0.3723	0.2229	24	68	46	7	10	20	3.5	5	2	10	18	11	-2.2766	2.17912e-05	0.000230772	down	-3.91882	1.83125e-10	1.72569e-09	down	-2.39193	4.73004e-06	3.65847e-05	down	1	7071481	7073788	+	Os01g0227800	Similar to cDNA%2C clone: J075083L18%2C full insert sequence	K20623 typhasterol/6-deoxotyphasterol 2alpha-hydroxylase | (RefSeq) flavonoid 3'-monooxygenase (A)	ko00905: Brassinosteroid biosynthesis; ko01100: Metabolic pathways; ko01110: Biosynthesis of secondary metabolites	--	C7317_PRUMU RecName: Full=Cytochrome P450 736A117 {ECO:0000303|PubMed:25015725}; EC=1.14.-.- {ECO:0000305};	A0A0P0V0F6_ORYSJ SubName: Full=Os01g0227800 protein {ECO:0000313|EMBL:BAS71138.1};	At2g30770	GO:0016021,integral component of membrane; GO:0020037,heme binding; GO:0005506,iron ion binding; GO:0004497,monooxygenase activity; GO:0016705,oxidoreductase activity, acting on paired donors, with incorporation or reduction of molecular oxygen; GO:0003674,molecular_function; GO:0005488,binding; GO:0046906,tetrapyrrole binding; GO:0097159,organic cyclic compound binding; GO:1901363,heterocyclic c…
Os01g0228500	1.2783	1.7408	1.50955	0.3337	0.5912	0.5949	0.5178	0.6189	0.4167	1.1986	0.8306	0.8787	25	35	30	7	18	16	13	17	9	38	25	27	-1.53821	0.00147479	0.0087481	down	-1.48237	0.000629486	0.00218928	down	-0.587256	0.149054	0.263359	false	1	7095864	7097381	-	Os01g0228500	Harpin-induced 1 domain containing protein	--	--	--	--	A0A0P0UZY2_ORYSJ SubName: Full=Os01g0228500 protein {ECO:0000313|EMBL:BAF04392.1};	At1g45688	GO:0016021,integral component of membrane; GO:0005575,cellular_component; GO:0016020,membrane; GO:0031224,intrinsic component of membrane; GO:0110165,cellular anatomical entity
Os01g0229400	1.5594	2.7401	2.14975	3.8461	3.005	2.7801	4.9993	4.9422	5.0564	2.9168	3.1049	3.778	31	56	43.5	82	93	76	124.5	138	111	94	95	118	0.588512	0.0685336	0.178853	false	1.24954	7.39045e-07	4.38208e-06	up	0.652968	0.0379941	0.0908601	false	1	7164735	7167419	-	RAC1	Similar to Rac-like GTP-binding protein 1	K04392 Ras-related C3 botulinum toxin substrate 1 | (RefSeq) rac-like GTP-binding protein 1 (A)	ko04145: Phagosome	--	RAC1_ORYSJ RecName: Full=Rac-like GTP-binding protein 1; AltName: Full=OsRac1;	B7EIY2_ORYSJ SubName: Full=Os01g0229400 protein {ECO:0000313|EMBL:BAS71159.1}; SubName: Full=cDNA clone:J023077H07, full insert sequence {ECO:0000313|EMBL:BAG92329.1};	At4g28950	GO:0005938,cell cortex; GO:0042995,cell projection; GO:0031410,cytoplasmic vesicle; GO:0005856,cytoskeleton; GO:0043231,intracellular membrane-bounded organelle; GO:0005634,nucleus; GO:0005886,plasma membrane; GO:0019899,enzyme binding; GO:0005525,GTP binding; GO:0003924,GTPase activity; GO:0019901,protein kinase binding; GO:0007015,actin filament organization; GO:0030865,cortical cytoskeleton or…
Os01g0231800	25.994	20.6199	23.307	43.4956	35.5297	37.2108	47.0162	36.9349	57.0974	41.1459	37.7087	36.3495	477	389	433	856	1015	939	1054.5	952	1157	1224	1065	1048	0.75418	1.85134e-07	3.09995e-06	false	1.04539	9.61504e-10	8.32107e-09	up	0.773132	2.32386e-09	3.45874e-08	false	1	7282051	7285991	+	Os01g0231800	Similar to cDNA clone:J033025F17%2C full insert sequence	K18666 activating signal cointegrator complex subunit 1 | (RefSeq) activating signal cointegrator 1 complex subunit 1 isoform X1 (A)	--	--	--	A0A0P0V044_ORYSJ SubName: Full=Os01g0231800 protein {ECO:0000313|EMBL:BAS71178.1}; Flags: Fragment;	At3g16220	--
Os01g0233500	0.4259	0.3866	0.40625	0.8206	0.7659	0.64	0.8699	1.0713	0.6685	0.5079	0.535	0.4518	15	14	14.5	31	42	31	39.5	53	26	29	29	25	0.905299	0.0463734	0.134339	false	1.18104	0.00388764	0.0110771	up	0.36384	0.447184	0.587887	false	1	7389373	7393708	-	CycA1	Cyclin	K06627 cyclin-A | (RefSeq) cyclin-A1-1 (A)	--	--	CCA11_ORYSJ RecName: Full=Cyclin-A1-1; AltName: Full=G2/mitotic-specific cyclin-A1-1; Short=CycA1;1;	A0A0D9Y5P8_9ORYZ RecName: Full=Cyclin N-terminal domain-containing protein {ECO:0000259|PROSITE:PS00292};	At1g44110	GO:0000307,cyclin-dependent protein kinase holoenzyme complex; GO:0005737,cytoplasm; GO:0005634,nucleus; GO:0016538,cyclin-dependent protein serine/threonine kinase regulator activity; GO:0051301,cell division; GO:0044772,mitotic cell cycle phase transition; GO:0000079,regulation of cyclin-dependent protein serine/threonine kinase activity; GO:0003674,molecular_function; GO:0019207,kinase regulat…
Os01g0237400	5.3623	2.2899	3.8261	2.0732	2.6043	2.4728	1.9252	1.9554	1.895	1.2102	1.5296	1.8313	41	18	29.5	17	31	26	18.5	21	16	15	18	22	-0.663774	0.151963	0.315753	false	-0.966967	0.0289403	0.0622632	false	-1.27977	0.0113478	0.0339001	down	1	7615973	7617208	-	Os01g0237400	Hypothetical conserved gene	K02957 small subunit ribosomal protein S15Ae | (RefSeq) 40S ribosomal protein S15a-5 (A)	ko03010: Ribosome	--	R15A5_ARATH RecName: Full=40S ribosomal protein S15a-5;	A0A0N7KCM6_ORYSJ SubName: Full=Os01g0237400 protein {ECO:0000313|EMBL:BAS71241.1}; Flags: Fragment;	At4g29430	GO:0022626,cytosolic ribosome; GO:0022627,cytosolic small ribosomal subunit; GO:0005739,mitochondrion; GO:0042788,polysomal ribosome; GO:0005773,vacuole; GO:0003735,structural constituent of ribosome; GO:0006412,translation; GO:0003674,molecular_function; GO:0005198,structural molecule activity; GO:0006518,peptide metabolic process; GO:0006807,nitrogen compound metabolic process; GO:0008150,biolo…
Os01g0237500	210.061	304.989	257.525	2.691	1.589	5.2467	2.53785	3.3022	1.7735	8.3928	2.9467	1.3777	2038	3042	2540	28	24	70	32	45	19	132	44	21	-6.32527	2.51313e-37	6.51521e-35	down	-6.58497	7.90645e-223	9.26122e-220	down	-5.88702	2.39768e-16	9.12016e-15	down	1	7619082	7620013	-	Os01g0237500	NmrA-like family protein	K23050 phenylcoumaran benzylic ether reductase [EC:1.3.1.-] | (RefSeq) isoflavone reductase homolog IRL (A)	--	--	ALL12_OLEEU RecName: Full=Isoflavone reductase-like protein {ECO:0000305}; AltName: Full=Pollen allergen Ole e 12 {ECO:0000303|PubMed:22385802}; AltName: Allergen=Ole e 12 {ECO:0000303|PubMed:22385802};	A0A0P0V0H1_ORYSJ SubName: Full=Os01g0237500 protein {ECO:0000313|EMBL:BAF04448.1}; Flags: Fragment;	At1g75280	GO:0005737,cytoplasm; GO:0016491,oxidoreductase activity; GO:0003674,molecular_function; GO:0003824,catalytic activity; GO:0005575,cellular_component; GO:0005622,intracellular anatomical structure; GO:0110165,cellular anatomical entity
Os01g0237750	183.96	319.558	251.759	2.2491	1.1362	2.4556	2.22695	3.4345	1.0194	8.6299	1.3582	0.8188	1144	2043	1593.5	15	11	21	18.5	30	7	87	13	8	-7.02679	8.13573e-131	9.51188e-127	down	-6.74862	5.60327e-49	3.97781e-47	down	-6.09379	2.54099e-10	4.388e-09	down	1	7624002	7624487	-	Os01g0237750	Hypothetical conserved gene	K23050 phenylcoumaran benzylic ether reductase [EC:1.3.1.-] | (RefSeq) isoflavone reductase homolog IRL (A)	--	--	EGS1_PETHY RecName: Full=Eugenol synthase 1 {ECO:0000303|PubMed:18208524}; Short=PhEGS1 {ECO:0000303|PubMed:18208524}; EC=1.1.1.318;	A0A0P0V0B4_ORYSJ SubName: Full=Os01g0237750 protein {ECO:0000313|EMBL:BAS71243.1};	At1g75290	GO:0000166,nucleotide binding; GO:0016491,oxidoreductase activity; GO:0009699,phenylpropanoid biosynthetic process; GO:0003674,molecular_function; GO:0005488,binding; GO:0036094,small molecule binding; GO:0097159,organic cyclic compound binding; GO:1901265,nucleoside phosphate binding; GO:1901363,heterocyclic compound binding; GO:0003824,catalytic activity; GO:0006725,cellular aromatic compound m…
Os01g0243600	2.8303	1.1336	1.98195	3.4153	2.5667	3.4505	4.07985	3.2596	4.9001	2.927	1.8931	3.232	34	14	24	44	48	57	60	55	65	57	35	61	0.686262	0.109082	0.250163	false	1.07399	0.0048248	0.0133685	up	0.494342	0.283532	0.424643	false	1	7926858	7927564	-	Os01g0243600	Conserved hypothetical protein	--	--	--	--	Q7F6H2_ORYSJ SubName: Full=Os01g0243600 protein {ECO:0000313|EMBL:BAF04479.1};	--	--
Os01g0246700	64.8314	82.1806	73.506	34.0207	43.9292	41.1718	22.9081	24.3313	21.485	35.3099	32.1405	23.2225	1768	2304	2036	995	1865	1544	789.5	932	647	1561	1349	995	-0.868236	1.3052e-11	4.17503e-10	false	-1.63559	5.97268e-53	4.78994e-51	down	-1.23236	1.72696e-15	5.90725e-14	down	1	8084184	8086980	+	OsWRKY1	Similar to WRKY transcription factor 1	--	--	--	WRKY6_ARATH RecName: Full=WRKY transcription factor 6 {ECO:0000303|PubMed:11722756}; AltName: Full=WRKY DNA-binding protein 6 {ECO:0000303|PubMed:11722756}; Short=AtWRKY6 {ECO:0000303|PubMed:11722756};	Q1EHS0_ORYSJ SubName: Full=Putative WRKY transcription factor 6 {ECO:0000313|EMBL:BAE95822.1};	At1g62300	GO:0005634,nucleus; GO:0003700,DNA-binding transcription factor activity; GO:0000976,transcription regulatory region sequence-specific DNA binding; GO:0080169,cellular response to boron-containing substance deprivation; GO:0016036,cellular response to phosphate starvation; GO:0009873,ethylene-activated signaling pathway; GO:0045892,negative regulation of transcription, DNA-templated; GO:0010200,r…
Os01g0247500	2.5621	2.2032	2.38265	3.947	4.4126	3.8343	4.095	3.516	4.674	7.0778	5.8868	6.3338	69	61	65	114	185	142	136	133	139	309	244	268	0.793059	0.000582704	0.00397125	false	0.814224	0.000272523	0.00102808	false	1.48642	6.15883e-13	1.54116e-11	up	1	8125672	8128014	-	OsRLCK27	Protein kinase%2C core domain containing protein	K13415 protein brassinosteroid insensitive 1 [EC:2.7.10.1 2.7.11.1] | (RefSeq) systemin receptor SR160 (A)	ko04075: Plant hormone signal transduction	--	Y1853_ARATH RecName: Full=Receptor-like serine/threonine-protein kinase At1g78530; EC=2.7.11.1;	A0A0D3ELQ5_9ORYZ RecName: Full=Protein kinase domain-containing protein {ECO:0000259|PROSITE:PS50011};	At1g78530	GO:0016021,integral component of membrane; GO:0005886,plasma membrane; GO:0005524,ATP binding; GO:0106310,protein serine kinase activity; GO:0106311,protein threonine kinase activity; GO:0006468,protein phosphorylation; GO:0000166,nucleotide binding; GO:0003674,molecular_function; GO:0005488,binding; GO:0017076,purine nucleotide binding; GO:0030554,adenyl nucleotide binding; GO:0032553,ribonucleo…
Os01g0248500	16.5976	23.1262	19.8619	7.4871	8.5292	10.9279	8.5618	6.6428	10.4808	13.9465	7.5197	7.9658	370	530	450	179	296	335	233	208	258	504	258	279	-1.12435	1.14798e-09	2.81966e-08	down	-1.18519	4.73008e-10	4.23915e-09	down	-0.969031	4.14143e-05	0.000260057	false	1	8175587	8177889	-	Os01g0248500	Similar to Pathogen-related protein	--	--	--	PRPX_HORVU RecName: Full=Pathogen-related protein;	Q7F7D8_ORYSJ SubName: Full=Os01g0248500 protein {ECO:0000313|EMBL:BAF04498.1}; SubName: Full=Putative pathogenesis related protein {ECO:0000313|EMBL:BAB18332.1};	At1g78780	GO:0006952,defense response; GO:0009607,response to biotic stimulus; GO:0006950,response to stress; GO:0008150,biological_process; GO:0050896,response to stimulus
Os01g0248701	2.5731	3.4586	3.01585	21.4188	32.1253	12.996	22.4977	18.6856	26.3098	8.1961	11.7334	13.6974	55	76	65.5	491	1069	382	591	561	621	284	386	460	2.89625	3.84088e-23	3.62142e-21	up	2.9285	2.64698e-51	2.02214e-49	up	1.94821	3.76291e-14	1.0964e-12	up	1	8191032	8192289	+	Os01g0248701	Terpenoid synthase domain containing protein	K13789 geranylgeranyl diphosphate synthase, type II [EC:2.5.1.1 2.5.1.10 2.5.1.29] | (RefSeq) geranylgeranyl pyrophosphate synthase 7, chloroplastic (A)	ko00900: Terpenoid backbone biosynthesis; ko01100: Metabolic pathways; ko01110: Biosynthesis of secondary metabolites	--	GGPP1_ARATH RecName: Full=Heterodimeric geranylgeranyl pyrophosphate synthase large subunit 1, chloroplastic; Short=GGPP synthase 1; Short=GGPS1; EC=2.5.1.-; AltName: Full=(2E,6E)-farnesyl diphosphate synthase 1; AltName: Full=Dimethylallyltranstransferase 1; EC=2.5.1.1; AltName: Full=Farnesyl diphosphate synthase 1; AltName: Full=Farnesyltranstransferase 1; EC=2.5.1.29; AltName: Full=Geranyltran…	A0A0P0V0B7_ORYSJ SubName: Full=Os01g0248701 protein {ECO:0000313|EMBL:BAS71331.1};	At4g36810	GO:0009507,chloroplast; GO:0005829,cytosol; GO:0009513,etioplast; GO:0009536,plastid; GO:0004161,dimethylallyltranstransferase activity; GO:0004311,farnesyltranstransferase activity; GO:0004337,geranyltranstransferase activity; GO:0046872,metal ion binding; GO:0004659,prenyltransferase activity; GO:0016117,carotenoid biosynthetic process; GO:0009793,embryo development ending in seed dormancy; GO:…
Os01g0253800	5.4619	11.0593	8.2606	10.2896	6.1576	14.5904	6.9095	7.4596	6.3594	31.8358	18.106	15.5371	49	102	75.5	99	86	180	78.5	94	63	463	250	219	0.337675	0.346842	0.544126	false	-0.217373	0.436094	0.557846	false	1.44469	8.29713e-06	6.08361e-05	up	1	8401548	8402325	-	Os01g0253800	Conserved hypothetical protein	--	--	--	--	C7IXJ4_ORYSJ SubName: Full=Os01g0253800 protein {ECO:0000313|EMBL:BAH90992.1};	At1g56320	--
Os01g0257100	20.5266	16.8182	18.6724	22.1575	14.2795	41.9313	39.2499	32.6839	45.8158	30.3156	30.7689	64.9983	241	203	222	279	261	677	566.5	539	594	577	556	1199	0.502291	0.102107	0.238707	false	1.10567	2.50964e-11	2.59802e-10	up	1.23303	1.67051e-05	0.000115465	up	1	8577244	8577934	-	OsRALF-5	Rapid ALkalinization Factor family protein	--	--	--	RALF_TOBAC RecName: Full=Rapid alkalinization factor; Short=NtRALF; Flags: Precursor;	Q9SDJ5_ORYSJ SubName: Full=Os01g0257100 protein {ECO:0000313|EMBL:BAS71398.1}; SubName: Full=cDNA, clone: J100046K16, full insert sequence {ECO:0000313|EMBL:BAH01501.1};	At3g05490	GO:0005576,extracellular region; GO:0009506,plasmodesma; GO:0005179,hormone activity; GO:0048018,receptor ligand activity; GO:0019722,calcium-mediated signaling; GO:0010469,regulation of signaling receptor activity; GO:0003674,molecular_function; GO:0005102,signaling receptor binding; GO:0005488,binding; GO:0005515,protein binding; GO:0030545,receptor regulator activity; GO:0030546,signaling rece…
Os01g0257300	0.1499	0.2188	0.18435	5.3829	2.6969	1.254	2.3234	1.3878	3.259	1.7574	3.2638	1.2407	2	3	2.5	77	56	23	37	26	48	38	67	26	4.19519	1.00227e-07	1.76343e-06	up	3.77067	1.42908e-07	9.42011e-07	up	3.64832	2.58368e-06	2.10987e-05	up	1	8586157	8586941	-	OsRAA1	Similar to FPF1	--	--	--	FLP1_ORYSJ RecName: Full=Flowering-promoting factor 1-like protein 1; AltName: Full=FPF1-like protein 1; AltName: Full=Protein ROOT ARCHITECTURE ASSOCIATED 1; Short=OsRAA1;	A0A0D3ELX9_9ORYZ SubName: Full=Uncharacterized protein {ECO:0000313|EnsemblPlants:OBART01G09910.1};	At5g24860	GO:0005737,cytoplasm; GO:0005634,nucleus; GO:0005525,GTP binding; GO:0045841,negative regulation of mitotic metaphase/anaphase transition; GO:0009909,regulation of flower development; GO:2000280,regulation of root development; GO:0009733,response to auxin; GO:0000166,nucleotide binding; GO:0001882,nucleoside binding; GO:0001883,purine nucleoside binding; GO:0003674,molecular_function; GO:0005488,…
Os01g0259933	6.0585	7.577	6.81775	3.8558	5.9302	5.3148	2.1312	2.2594	2.003	5.2204	3.874	2.0811	63	81	72	43	96	76	28	33	23	88	62	34	-0.410353	0.146785	0.307979	false	-1.63018	1.70724e-08	1.27252e-07	down	-0.825101	0.0205881	0.0553107	false	1	8722666	8723283	+	Os01g0259933	Non-protein coding transcript	--	--	--	--	--	--	--
Os01g0260100	0.5701	0.5056	0.53785	0.6879	0.4955	1.39	1.9238	0.8714	2.9762	1.3446	1.7976	5.763	34	31	32.5	44	46	114	134.5	73	196	130	165	540	0.698826	0.101912	0.238348	false	1.86067	2.55237e-06	1.38606e-05	up	2.54162	1.62296e-07	1.71201e-06	up	1	8734767	8741720	-	Os01g0260100	Similar to Kinesin heavy chain (Fragment)	K10405 kinesin family member C1 | (RefSeq) kinesin-4 isoform X1 (A)	--	--	KN14B_ORYSJ RecName: Full=Kinesin-like protein KIN-14B {ECO:0000305};	A0A0D3ELZ3_9ORYZ RecName: Full=Kinesin motor domain-containing protein {ECO:0000259|PROSITE:PS50067};	At1g55550	GO:0005871,kinesin complex; GO:0005874,microtubule; GO:0005524,ATP binding; GO:0008574,ATP-dependent microtubule motor activity, plus-end-directed; GO:0016887,ATPase activity; GO:0008017,microtubule binding; GO:0003777,microtubule motor activity; GO:0030705,cytoskeleton-dependent intracellular transport; GO:0007018,microtubule-based movement; GO:0000166,nucleotide binding; GO:0003674,molecular_fu…
Os01g0260800	29.9811	19.7338	24.8575	49.2607	35.3588	40.6837	55.4138	46.6826	64.1451	45.531	71.3509	67.1625	433	293	363	763	795	808	985	947	1023	1066	1586	1524	0.770416	3.92879e-05	0.000387012	false	1.19247	8.97763e-12	9.74601e-11	up	1.36039	1.26804e-10	2.30433e-09	up	1	8767828	8773510	+	Os01g0260800	Conserved hypothetical protein	--	--	--	--	A0A0P0V173_ORYSJ SubName: Full=Os01g0260800 protein {ECO:0000313|EMBL:BAF04560.1};	--	--
Os01g0266100	1.144	1.4219	1.28295	0.5334	0.3674	0.5546	0.78135	0.8145	0.7482	1.0978	0.5368	1.699	18	23	20.5	9	9	12	15.5	18	13	28	13	42	-1.38247	0.0126577	0.0492963	down	-0.643028	0.150929	0.244105	false	-0.136132	0.801591	0.871698	false	1	9088088	9089013	+	Os01g0266100	Similar to RING finger family protein	K16282 E3 ubiquitin-protein ligase RHA2 [EC:2.3.2.27] | (RefSeq) E3 ubiquitin-protein ligase EL5-like (A)	--	--	RHA2A_ARATH RecName: Full=E3 ubiquitin-protein ligase RHA2A {ECO:0000305}; EC=2.3.2.27; AltName: Full=RING-H2 finger A2a {ECO:0000303|PubMed:9781696}; AltName: Full=RING-H2 zinc finger protein RHA2a {ECO:0000305}; AltName: Full=RING-type E3 ubiquitin transferase RHA2A {ECO:0000305};	Q9LJ01_ORYSJ SubName: Full=Os01g0266100 protein {ECO:0000313|EMBL:BAS71465.1}; SubName: Full=cDNA clone:001-112-G10, full insert sequence {ECO:0000313|EMBL:BAG88608.1};	At1g15100	GO:0005737,cytoplasm; GO:0005634,nucleus; GO:0046872,metal ion binding; GO:0061630,ubiquitin protein ligase activity; GO:0004842,ubiquitin-protein transferase activity; GO:0009738,abscisic acid-activated signaling pathway; GO:0009789,positive regulation of abscisic acid-activated signaling pathway; GO:0016567,protein ubiquitination; GO:0047484,regulation of response to osmotic stress; GO:0009651,…
Os01g0268600	2.4803	2.1321	2.3062	0.251	0.3829	0.6571	0.2762	0.2738	0.2786	0.2847	0.4872	0.5752	129	114	121.5	14	31	47	18	20	16	24	39	47	-2.39062	3.40699e-13	1.35256e-11	down	-3.02351	4.16651e-26	1.17037e-24	down	-2.30673	9.05884e-14	2.53226e-12	down	1	9245577	9253404	+	Os01g0268600	Glycoside hydrolase%2C family 31 protein	K05546 mannosyl-oligosaccharide alpha-1,3-glucosidase [EC:3.2.1.207] | (RefSeq) probable glucan 1,3-alpha-glucosidase (A)	ko00510: N-Glycan biosynthesis; ko01100: Metabolic pathways; ko04141: Protein processing in endoplasmic reticulum	--	GLU2A_ORYSJ RecName: Full=Probable glucan 1,3-alpha-glucosidase; EC=3.2.1.207 {ECO:0000250|UniProtKB:P38138}; AltName: Full=Glucosidase II subunit alpha; Flags: Precursor;	A0A5S6RD55_ORYSJ SubName: Full=Alpha-glucosidase-like {ECO:0000313|EMBL:BAD81144.1}; SubName: Full=Os01g0268500 protein {ECO:0000313|EMBL:BAF04606.2};	At5g11720	GO:0005783,endoplasmic reticulum; GO:0090599,alpha-glucosidase activity; GO:0030246,carbohydrate binding; GO:0004553,hydrolase activity, hydrolyzing O-glycosyl compounds; GO:0005975,carbohydrate metabolic process; GO:0006952,defense response; GO:0006491,N-glycan processing; GO:0003674,molecular_function; GO:0003824,catalytic activity; GO:0015926,glucosidase activity; GO:0016787,hydrolase activity…
Os01g0269800	0.1649	0.1924	0.17865	0.3074	0.2118	0.2637	0.10985	0.0704	0.1493	1.5254	0.5141	0.6086	5	6	5.5	10	10	11	4	3	5	75	24	29	NA	NA	NA	NA	NA	NA	NA	NA	2.30664	0.000455684	0.00214952	up	1	9316276	9318060	+	Os01g0269800	NB-ARC domain containing protein	K13457 disease resistance protein RPM1 | (RefSeq) disease resistance protein RPM1 (A)	ko04626: Plant-pathogen interaction	--	PIK6_ORYSJ RecName: Full=Disease resistance protein PIK6-NP {ECO:0000305};	Q9LJ10_ORYSJ SubName: Full=NBS-LRR disease resistance protein-like {ECO:0000313|EMBL:BAA89580.1}; SubName: Full=Os01g0269800 protein {ECO:0000313|EMBL:BAF04613.1};	At1g53350	GO:0043531,ADP binding; GO:0005524,ATP binding; GO:0006952,defense response; GO:0000166,nucleotide binding; GO:0003674,molecular_function; GO:0005488,binding; GO:0017076,purine nucleotide binding; GO:0030554,adenyl nucleotide binding; GO:0032553,ribonucleotide binding; GO:0032555,purine ribonucleotide binding; GO:0032559,adenyl ribonucleotide binding; GO:0036094,small molecule binding; GO:0043167…
Os01g0270300	0.8017	1.2052	1.00345	0.2379	0.117	0.2385	0.70155	0.9081	0.495	1.2139	0.6393	2.2499	22	34	28	7	5	9	25	35	15	54	27	97	-2.34786	3.76681e-05	0.000373119	down	-0.450591	0.262399	0.378826	false	0.508324	0.311033	0.454942	false	1	9339815	9342240	+	prx4	Similar to Cationic peroxidase isozyme 40K precursor	K00430 peroxidase [EC:1.11.1.7] | (RefSeq) peroxidase 24 (A)	ko00940: Phenylpropanoid biosynthesis; ko01100: Metabolic pathways; ko01110: Biosynthesis of secondary metabolites	--	PER24_ARATH RecName: Full=Peroxidase 24; Short=Atperox P24; EC=1.11.1.7; AltName: Full=ATP47; Flags: Precursor;	Q9LDL0_ORYSJ RecName: Full=Peroxidase {ECO:0000256|ARBA:ARBA00012313, ECO:0000256|RuleBase:RU362060}; EC=1.11.1.7 {ECO:0000256|ARBA:ARBA00012313, ECO:0000256|RuleBase:RU362060};	At2g39040	GO:0005576,extracellular region; GO:0009505,plant-type cell wall; GO:0009506,plasmodesma; GO:0020037,heme binding; GO:0046872,metal ion binding; GO:0004601,peroxidase activity; GO:0042744,hydrogen peroxide catabolic process; GO:0006979,response to oxidative stress; GO:0003674,molecular_function; GO:0005488,binding; GO:0046906,tetrapyrrole binding; GO:0097159,organic cyclic compound binding; GO:19…
Os01g0273800	12.7574	11.0029	11.8802	2.3394	1.8302	4.4839	2.823	2.6037	3.0423	4.748	3.0117	2.7337	300	266	283	59	67	145	82.5	86	79	181	109	101	-2.02362	1.13807e-12	4.19741e-11	down	-2.04228	2.66996e-32	1.01706e-30	down	-1.71407	2.53786e-14	7.59313e-13	down	1	9488825	9493964	+	OsYUCCA9	FAD-dependent pyridine nucleotide-disulphide oxidoreductase domain containing protein	K11816 indole-3-pyruvate monooxygenase [EC:1.14.13.168] | (RefSeq) probable indole-3-pyruvate monooxygenase YUCCA10 (A)	ko00380: Tryptophan metabolism; ko01100: Metabolic pathways	--	YUC10_ARATH RecName: Full=Probable indole-3-pyruvate monooxygenase YUCCA10; EC=1.14.13.168; AltName: Full=Flavin-containing monooxygenase YUCCA10;	Q9SDE9_ORYSJ SubName: Full=Os01g0273800 protein {ECO:0000313|EMBL:BAS71525.1}; SubName: Full=cDNA clone:002-138-H02, full insert sequence {ECO:0000313|EMBL:BAG98834.1};	At1g48910	GO:0050660,flavin adenine dinucleotide binding; GO:0103075,indole-3-pyruvate monooxygenase activity; GO:0050661,NADP binding; GO:0009851,auxin biosynthetic process; GO:0009723,response to ethylene; GO:0000166,nucleotide binding; GO:0003674,molecular_function; GO:0005488,binding; GO:0036094,small molecule binding; GO:0043167,ion binding; GO:0043168,anion binding; GO:0097159,organic cyclic compound…
Os01g0274100	1.0952	1.5285	1.31185	2.2644	3.0281	2.8394	2.1692	2.9154	1.423	1.8505	2.4132	1.4547	23	33	28	51	99	82	59.5	86	33	63	78	48	1.06969	0.00132364	0.0079483	up	0.794044	0.0253629	0.0557861	false	0.589349	0.1132	0.213455	false	1	9512985	9515102	+	OsYUCCA10	Similar to disulfide oxidoreductase/ monooxygenase/ oxidoreductase	K11816 indole-3-pyruvate monooxygenase [EC:1.14.13.168] | (RefSeq) probable indole-3-pyruvate monooxygenase YUCCA10 (A)	ko00380: Tryptophan metabolism; ko01100: Metabolic pathways	--	YUC10_ARATH RecName: Full=Probable indole-3-pyruvate monooxygenase YUCCA10; EC=1.14.13.168; AltName: Full=Flavin-containing monooxygenase YUCCA10;	Q0JNP7_ORYSJ SubName: Full=Os01g0274100 protein {ECO:0000313|EMBL:BAF04631.2};	At1g48910	GO:0050660,flavin adenine dinucleotide binding; GO:0103075,indole-3-pyruvate monooxygenase activity; GO:0050661,NADP binding; GO:0009851,auxin biosynthetic process; GO:0009723,response to ethylene; GO:0000166,nucleotide binding; GO:0003674,molecular_function; GO:0005488,binding; GO:0036094,small molecule binding; GO:0043167,ion binding; GO:0043168,anion binding; GO:0097159,organic cyclic compound…
Os01g0276700	46.5298	47.3673	46.9485	14.3198	13.7304	26.6243	15.386	13.8127	16.9593	16.1109	11.0106	16.1635	1933	2023	1978	638	888	1521	792	806	778	1085	704	1055	-1.3473	9.69049e-11	2.7566e-09	down	-1.57309	4.4933e-51	3.38471e-49	down	-1.64798	3.03942e-27	2.78875e-25	down	1	9694027	9699817	-	Os01g0276700	Similar to Pyruvate kinase%2C cytosolic isozyme (EC 2.7.1.40) (PK)	K00873 pyruvate kinase [EC:2.7.1.40] | (RefSeq) pyruvate kinase, cytosolic isozyme (A)	ko00010: Glycolysis / Gluconeogenesis; ko00620: Pyruvate metabolism; ko01100: Metabolic pathways; ko01110: Biosynthesis of secondary metabolites; ko01200: Carbon metabolism; ko01230: Biosynthesis of amino acids	--	KPYC_TOBAC RecName: Full=Pyruvate kinase, cytosolic isozyme; Short=PK; EC=2.7.1.40;	B9EV72_ORYSJ RecName: Full=Pyruvate kinase {ECO:0000256|ARBA:ARBA00012142, ECO:0000256|RuleBase:RU000504}; EC=2.7.1.40 {ECO:0000256|ARBA:ARBA00012142, ECO:0000256|RuleBase:RU000504};	At5g56350	GO:0005737,cytoplasm; GO:0005524,ATP binding; GO:0016301,kinase activity; GO:0000287,magnesium ion binding; GO:0030955,potassium ion binding; GO:0004743,pyruvate kinase activity; GO:0006096,glycolytic process; GO:0000166,nucleotide binding; GO:0003674,molecular_function; GO:0005488,binding; GO:0017076,purine nucleotide binding; GO:0030554,adenyl nucleotide binding; GO:0032553,ribonucleotide bindi…
Os01g0276900	7.5259	3.8659	5.6959	12.0636	6.0836	6.6411	10.9804	8.7896	13.1712	19.248	21.2626	13.832	89	47	68	153	112	108	159	146	172	369	387	257	0.556864	0.11129	0.253983	false	0.979664	0.000326581	0.00121	false	1.72053	3.79996e-10	6.38246e-09	up	1	9711631	9712419	-	Os01g0276900	Conserved hypothetical protein	--	--	--	--	A0A0N7KCR6_ORYSJ SubName: Full=Os01g0276900 protein {ECO:0000313|EMBL:BAH91007.1};	--	--
Os01g0278000	2.3194	2.6509	2.48515	4.4875	3.7991	3.5841	4.81505	3.5915	6.0386	3.863	5.8772	5.0561	40	47	43.5	83	102	85	101	87	115	108	156	137	0.682396	0.0162454	0.0601148	false	0.974089	0.000544906	0.00192339	false	1.0381	0.000316047	0.00156168	up	1	9770018	9771047	-	OsVQ1	VQ domain containing protein	--	--	--	CAB25_ARATH RecName: Full=Calmodulin-binding protein 25 {ECO:0000303|PubMed:15086802}; Short=AtCAMBP25 {ECO:0000303|PubMed:15086802}; AltName: Full=VQ motif-containing protein 15 {ECO:0000303|PubMed:22535423}; Short=AtVQ15 {ECO:0000303|PubMed:22535423};	A0A0P0V125_ORYSJ SubName: Full=Os01g0278000 protein {ECO:0000313|EMBL:BAS71566.1};	--	GO:0005634,nucleus; GO:0005516,calmodulin binding; GO:0071456,cellular response to hypoxia; GO:0010337,regulation of salicylic acid metabolic process; GO:0006970,response to osmotic stress; GO:0009651,response to salt stress; GO:0009414,response to water deprivation; GO:0003674,molecular_function; GO:0005488,binding; GO:0005515,protein binding; GO:0001666,response to hypoxia; GO:0006950,response …
Os01g0278950	0.221	0.0478	0.1344	0.3434	0.2208	0.6249	0.52345	0.4021	0.6448	0.6664	0.4786	0.3907	9	2	5.5	15	14	35	26	23	29	44	30	25	NA	NA	NA	NA	1.95257	0.00119882	0.00389634	up	1.94115	0.00312789	0.0114402	up	1	9863216	9866617	+	OsSub1	Similar to predicted protein	--	--	--	CRSP_ARATH RecName: Full=CO(2)-response secreted protease {ECO:0000303|PubMed:25043023}; AltName: Full=Subtilisin-like serine protease {ECO:0000303|PubMed:25043023}; Short=AtSBT5.2 {ECO:0000303|PubMed:25043023}; AltName: Full=Tripeptidyl-peptidase II {ECO:0000255|PROSITE-ProRule:PRU10081}; EC=3.4.14.10 {ECO:0000255|PROSITE-ProRule:PRU10081}; Flags: Precursor;	A0A0P0V171_ORYSJ SubName: Full=Putative subtilisin-like protein {ECO:0000313|EMBL:BAA89562.1};	At1g20160	GO:0048046,apoplast; GO:0005618,cell wall; GO:0004252,serine-type endopeptidase activity; GO:0008236,serine-type peptidase activity; GO:0008240,tripeptidyl-peptidase activity; GO:1900425,negative regulation of defense response to bacterium; GO:2000122,negative regulation of stomatal complex development; GO:0006508,proteolysis; GO:2000038,regulation of stomatal complex development; GO:0010037,resp…
Os01g0279400	1.0862	1.2487	1.16745	1.4118	1.4378	1.891	2.988	2.5778	3.3982	1.6447	1.9462	1.697	33	39	36	46	68	79	112	110	114	81	91	81	0.457073	0.157868	0.323582	false	1.38794	9.61567e-08	6.48249e-07	up	0.647334	0.0308369	0.0768033	false	1	9889550	9902737	-	OsZIFL2	Major facilitator superfamily antiporter	--	--	--	PTR36_ARATH RecName: Full=Probable peptide/nitrate transporter At3g43790; AltName: Full=Protein ZINC INDUCED FACILITATOR-LIKE 2;	Q5NBS2_ORYSJ SubName: Full=Major facilitator superfamily antiporter {ECO:0000313|EMBL:BAD81084.1}; SubName: Full=Os01g0279400 protein {ECO:0000313|EMBL:BAF04662.1};	At3g43790	GO:0016021,integral component of membrane; GO:0022857,transmembrane transporter activity; GO:0009624,response to nematode; GO:0003674,molecular_function; GO:0005215,transporter activity; GO:0008150,biological_process; GO:0009605,response to external stimulus; GO:0009607,response to biotic stimulus; GO:0043207,response to external biotic stimulus; GO:0044419,biological process involved in interspe…
Os01g0280200	0.7336	0.7136	0.7236	0.7981	0.3665	1.4227	1.31725	1.3058	1.3287	1.3828	1.2446	2.4385	18	18	18	21	14	48	40.5	45	36	55	47	94	0.268001	0.635338	0.78854	false	0.899851	0.0144198	0.034446	false	1.28245	0.00349938	0.0125807	up	1	9954154	9955696	+	Os01g0280200	IQ motif%2C EF-hand binding site domain containing protein	--	--	--	IQD25_ARATH RecName: Full=Protein IQ-DOMAIN 25 {ECO:0000303|PubMed:16368012}; Short=AtIQD25 {ECO:0000303|PubMed:16368012};	Q5NAB8_ORYSJ SubName: Full=Uncharacterized protein {ECO:0000313|EMBL:BAD81588.1};	At4g29150	GO:0005516,calmodulin binding; GO:0003674,molecular_function; GO:0005488,binding; GO:0005515,protein binding
Os01g0280400	5.8983	5.6749	5.7866	1.4945	3.624	3.9628	1.79625	2.054	1.5385	2.6893	2.4785	2.2035	184	182	183	50	176	170	71.5	90	53	136	119	108	-0.910262	0.00232426	0.0127603	false	-1.62813	1.51578e-17	2.63429e-16	down	-1.18326	2.25463e-10	3.92524e-09	down	1	9962807	9966715	+	Os01g0280400	DNA-binding protein	--	--	--	PP135_ARATH RecName: Full=Pentatricopeptide repeat-containing protein At1g80270, mitochondrial; Flags: Precursor;	Q5NBR3_ORYSJ SubName: Full=Putative DNA-binding protein {ECO:0000313|EMBL:BAD81093.1};	At1g80270	GO:0009941,chloroplast envelope; GO:0005739,mitochondrion; GO:0003729,mRNA binding; GO:0003674,molecular_function; GO:0003676,nucleic acid binding; GO:0003723,RNA binding; GO:0005488,binding; GO:0097159,organic cyclic compound binding; GO:1901363,heterocyclic compound binding; GO:0005575,cellular_component; GO:0005622,intracellular anatomical structure; GO:0005737,cytoplasm; GO:0009507,chloroplas…
Os01g0280500	3.6499	6.8047	5.2273	0.2363	0.1302	0.258	0.2444	0.397	0.0918	0.1251	0.0329	0.0645	72	138	105	5	4	7	6.5	11	2	4	1	2	-4.66025	9.65902e-22	8.3342e-20	down	-4.33395	1.03294e-21	2.32011e-20	down	-6.0737	3.44897e-21	2.10693e-19	down	1	9967185	9969073	-	Os01g0280500	Similar to Eukaryotic translation initiation factor 6 (eIF-6) (B4 integrin interactor) (CAB) (p27(BBP)) (B(2)GCN homolog)	K03264 translation initiation factor 6 | (RefSeq) eukaryotic translation initiation factor 6-2 (A)	ko03008: Ribosome biogenesis in eukaryotes	--	IF62_ARATH RecName: Full=Eukaryotic translation initiation factor 6-2 {ECO:0000255|HAMAP-Rule:MF_03132}; Short=AteIF-6;2;	Q5NAB6_ORYSJ RecName: Full=Eukaryotic translation initiation factor 6 {ECO:0000256|HAMAP-Rule:MF_03132}; Short=eIF-6 {ECO:0000256|HAMAP-Rule:MF_03132};	At3g55620	GO:0005829,cytosol; GO:0005730,nucleolus; GO:0005634,nucleus; GO:0030687,preribosome, large subunit precursor; GO:0043023,ribosomal large subunit binding; GO:0043022,ribosome binding; GO:0003743,translation initiation factor activity; GO:1902626,assembly of large subunit precursor of preribosome; GO:0071215,cellular response to abscisic acid stimulus; GO:0009793,embryo development ending in seed …
Os01g0281600	5.1559	2.3475	3.7517	1.6366	1.0218	4.2679	5.09225	3.2802	6.9043	10.9965	5.5952	24.1584	94	44	69	32	29	107	111.5	84	139	325	157	692	-0.68243	0.165012	0.333498	false	0.46719	0.170367	0.268622	false	1.92032	0.0046997	0.0161183	up	1	10048273	10050309	-	OsENODL4	Cupredoxin domain containing protein	--	--	--	BCP1B_MEDTR RecName: Full=Blue copper protein 1b {ECO:0000303|PubMed:20687807}; Short=MtBcp1b {ECO:0000303|PubMed:20687807}; Flags: Precursor;	Q7F6R5_ORYSJ SubName: Full=Os01g0281600 protein {ECO:0000313|EMBL:BAF04674.1};	At1g08500	GO:0046658,anchored component of plasma membrane; GO:0016021,integral component of membrane; GO:0009055,electron transfer activity; GO:0046872,metal ion binding; GO:0009610,response to symbiotic fungus; GO:0003674,molecular_function; GO:0003824,catalytic activity; GO:0016491,oxidoreductase activity; GO:0005488,binding; GO:0043167,ion binding; GO:0043169,cation binding; GO:0008150,biological_proce…
Os01g0283600	0.36	0.4669	0.41345	0.7832	0.3854	0.5235	2.44535	1.7939	3.0968	1.4803	0.7016	2.9021	6	8	7	14	10	12	49.5	42	57	40	18	76	NA	NA	NA	NA	2.59267	6.13324e-08	4.2347e-07	up	2.09748	0.00154451	0.00626288	up	1	10144374	10146312	+	OsCCR4	Similar to Cinnamoyl CoA reductase	K09753 cinnamoyl-CoA reductase [EC:1.2.1.44] | (RefSeq) cinnamoyl-CoA reductase 1 (A)	ko00940: Phenylpropanoid biosynthesis; ko01100: Metabolic pathways; ko01110: Biosynthesis of secondary metabolites	--	CCR1_ORYSJ RecName: Full=Cinnamoyl-CoA reductase 1 {ECO:0000305}; Short=OsCCR1 {ECO:0000303|PubMed:16380417}; EC=1.2.1.44 {ECO:0000269|PubMed:16380417};	Q7F721_ORYSJ SubName: Full=Os01g0283600 protein {ECO:0000313|EMBL:BAS71615.1}; SubName: Full=Putative cinnamoyl-CoA reductase {ECO:0000313|EMBL:BAB39960.1};	At1g15950	GO:0005737,cytoplasm; GO:0016621,cinnamoyl-CoA reductase activity; GO:0016616,oxidoreductase activity, acting on the CH-OH group of donors, NAD or NADP as acceptor; GO:0006952,defense response; GO:0009809,lignin biosynthetic process; GO:0003674,molecular_function; GO:0003824,catalytic activity; GO:0016491,oxidoreductase activity; GO:0016620,oxidoreductase activity, acting on the aldehyde or oxo g…
Os01g0283700	5.0364	6.6253	5.83085	21.0655	16.8536	8.5108	19.3046	21.1041	17.5052	14.5872	12.0921	17.3101	105	142	123.5	471	547	244	510.5	618	403	493	388	567	1.42946	9.51641e-07	1.38127e-05	up	1.77172	9.57982e-32	3.52872e-30	up	1.38392	9.55453e-12	2.06797e-10	up	1	10148777	10152280	+	OsCCR5	Similar to Cinnamoyl-CoA reductase (EC 1.2.1.44)	K09753 cinnamoyl-CoA reductase [EC:1.2.1.44] | (RefSeq) cinnamoyl-CoA reductase 1 (A)	ko00940: Phenylpropanoid biosynthesis; ko01100: Metabolic pathways; ko01110: Biosynthesis of secondary metabolites	--	CCR1_ORYSJ RecName: Full=Cinnamoyl-CoA reductase 1 {ECO:0000305}; Short=OsCCR1 {ECO:0000303|PubMed:16380417}; EC=1.2.1.44 {ECO:0000269|PubMed:16380417};	Q9AQV6_ORYSJ SubName: Full=Os01g0283700 protein {ECO:0000313|EMBL:BAS71616.1}; SubName: Full=Putative cinnamoyl-CoA reductase {ECO:0000313|EMBL:BAB39961.1};	At1g15950	GO:0005737,cytoplasm; GO:0016621,cinnamoyl-CoA reductase activity; GO:0016616,oxidoreductase activity, acting on the CH-OH group of donors, NAD or NADP as acceptor; GO:0006952,defense response; GO:0009809,lignin biosynthetic process; GO:0003674,molecular_function; GO:0003824,catalytic activity; GO:0016491,oxidoreductase activity; GO:0016620,oxidoreductase activity, acting on the aldehyde or oxo g…
Os01g0285300	6.8403	4.0867	5.4635	5.4068	4.773	7.5749	8.60135	8.7757	8.427	14.2008	12.4082	17.9231	197	121	159	167	214	300	311.5	355	268	663	550	811	0.13565	0.586951	0.753895	false	0.700133	0.00021274	0.000820387	false	1.49876	3.25174e-11	6.46398e-10	up	1	10217782	10219691	-	OsMYB55/61	Myb transcription factor domain containing protein	K09422 transcription factor MYB, plant | (RefSeq) transcription factor LAF1 (A)	--	--	MYB61_ARATH RecName: Full=Transcription factor MYB61 {ECO:0000305}; AltName: Full=Myb-related protein 61 {ECO:0000305}; Short=AtMYB61 {ECO:0000303|PubMed:16005292};	A0A0P0V141_ORYSJ SubName: Full=Os01g0285300 protein {ECO:0000313|EMBL:BAF04687.1}; SubName: Full=Putative MYB2 {ECO:0000313|EMBL:BAB39987.1};	At1g09540	GO:0005634,nucleus; GO:0003700,DNA-binding transcription factor activity; GO:0000976,transcription regulatory region sequence-specific DNA binding; GO:0010087,phloem or xylem histogenesis; GO:0010119,regulation of stomatal movement; GO:0048364,root development; GO:0010214,seed coat development; GO:0010089,xylem development; GO:0003674,molecular_function; GO:0140110,transcription regulator activit…
Os01g0287600	4.2397	3.0388	3.63925	7.6985	5.3035	4.1784	6.42815	4.9248	7.9315	6.1254	8.1554	8.06	76	56	66	148	148	103	140.5	124	157	178	225	227	0.67336	0.0241919	0.0820539	false	0.848061	0.000887732	0.00298078	false	1.08939	1.24195e-05	8.82681e-05	up	1	10342026	10343570	-	Cht10	Similar to Chitinase 10	K20547 basic endochitinase B [EC:3.2.1.14] | (RefSeq) chitinase 9 (A)	ko00520: Amino sugar and nucleotide sugar metabolism; ko01100: Metabolic pathways; ko04016: MAPK signaling pathway - plant	--	CHI10_ORYSJ RecName: Full=Chitinase 10; EC=3.2.1.14; AltName: Full=Pathogenesis related (PR)-3 chitinase 10; Flags: Precursor;	A0A0E0MUW7_ORYRU RecName: Full=Chitinase {ECO:0000256|ARBA:ARBA00012729}; EC=3.2.1.14 {ECO:0000256|ARBA:ARBA00012729};	At1g02360	GO:0004568,chitinase activity; GO:0016998,cell wall macromolecule catabolic process; GO:0006032,chitin catabolic process; GO:0000272,polysaccharide catabolic process; GO:0003674,molecular_function; GO:0003824,catalytic activity; GO:0004553,hydrolase activity, hydrolyzing O-glycosyl compounds; GO:0016787,hydrolase activity; GO:0016798,hydrolase activity, acting on glycosyl bonds; GO:0008150,biolog…
Os01g0289950	0.5419	0.5535	0.5477	0.7074	0.7136	0.5714	0.89235	0.6559	1.1288	1.3539	0.9683	0.8451	20	21	20.5	28	41	29	40	34	46	81	55	49	0.309656	0.464409	0.654328	false	0.738322	0.0554473	0.107025	false	1.00877	0.00945744	0.0291536	up	1	10489015	10491186	+	Os01g0289950	Conserved hypothetical protein	K15400 omega-hydroxypalmitate O-feruloyl transferase [EC:2.3.1.188] | (RefSeq) omega-hydroxypalmitate O-feruloyl transferase isoform X1 (A)	ko00073: Cutin, suberine and wax biosynthesis	--	PMAT2_ARATH RecName: Full=Phenolic glucoside malonyltransferase 2; EC=2.3.1.-;	A0A0N7KCS7_ORYSJ SubName: Full=Os01g0289900 protein {ECO:0000313|EMBL:BAS71649.1};	At3g29670	GO:0050736,O-malonyltransferase activity; GO:0009636,response to toxic substance; GO:0003674,molecular_function; GO:0003824,catalytic activity; GO:0008374,O-acyltransferase activity; GO:0016420,malonyltransferase activity; GO:0016740,transferase activity; GO:0016746,transferase activity, transferring acyl groups; GO:0016747,transferase activity, transferring acyl groups other than amino-acyl grou…
Os01g0290700	3.7892	3.529	3.6591	12.8549	6.836	8.7356	9.0526	6.7156	11.3896	5.222	7.2813	10.776	47	45	46	171	132	149	136.5	117	156	105	139	210	1.39021	4.60079e-06	5.74067e-05	up	1.3321	7.23989e-07	4.29825e-06	up	1.14507	0.00059871	0.00273221	up	1	10515442	10516270	-	OsABCB1	Similar to CjMDR1	K05658 ATP-binding cassette, subfamily B (MDR/TAP), member 1 [EC:7.6.2.2] | (RefSeq) ABC transporter B family member 21 (A)	ko02010: ABC transporters	--	AB21B_ARATH RecName: Full=ABC transporter B family member 21; Short=ABC transporter ABCB.21; Short=AtABCB21; AltName: Full=Multidrug resistance protein 17; AltName: Full=P-glycoprotein 21;	A0A0P0V189_ORYSJ SubName: Full=Os01g0290700 protein {ECO:0000313|EMBL:BAF04703.1}; Flags: Fragment;	At3g62150	GO:0005829,cytosol; GO:0016021,integral component of membrane; GO:0005886,plasma membrane; GO:0005774,vacuolar membrane; GO:0005524,ATP binding; GO:0042626,ATPase-coupled transmembrane transporter activity; GO:0010329,auxin efflux transmembrane transporter activity; GO:0010328,auxin influx transmembrane transporter activity; GO:0010315,auxin efflux; GO:0060919,auxin influx; GO:0055085,transmembra…
Os01g0291500	4.4043	5.9425	5.1734	11.4591	9.9931	8.3685	10.7034	9.6344	11.7724	11.5029	17.7006	16.842	124	172	148	346	438	324	373.5	381	366	525	767	745	0.961474	8.51243e-07	1.24951e-05	false	1.08532	6.11246e-11	6.05995e-10	up	1.6256	2.58667e-14	7.72927e-13	up	1	10561330	10565325	-	OsAT4	Transferase family protein	K19861 benzyl alcohol O-benzoyltransferase [EC:2.3.1.196 2.3.1.232] | (RefSeq) benzyl alcohol O-benzoyltransferase (A)	--	--	AT4_ORYSJ RecName: Full=Acyl transferase 4 {ECO:0000305}; Short=OsAT4 {ECO:0000303|PubMed:23391577}; EC=2.3.1.- {ECO:0000305}; AltName: Full=p-coumaroyl-CoA monolignol transferase {ECO:0000305}; Short=OsPMT {ECO:0000303|PubMed:22267741};	I1NMD9_ORYGL SubName: Full=Uncharacterized protein {ECO:0000313|EnsemblPlants:ORGLA01G0102900.1};	At3g62160	GO:0016410,N-acyltransferase activity; GO:0009809,lignin biosynthetic process; GO:0003674,molecular_function; GO:0003824,catalytic activity; GO:0016740,transferase activity; GO:0016746,transferase activity, transferring acyl groups; GO:0016747,transferase activity, transferring acyl groups other than amino-acyl groups; GO:0006725,cellular aromatic compound metabolic process; GO:0008150,biological…
Os01g0293000	0.9008	1.3144	1.1076	2.8699	1.8324	1.4193	2.481	3.1265	1.8355	1.2503	1.1218	1.1467	24	36	30	82	76	52	85.5	117	54	54	46	48	0.896532	0.0199615	0.0706785	false	1.22443	8.57118e-05	0.00035863	up	0.13501	0.706654	0.805625	false	1	10657543	10660137	-	OsSAMS3	S-adenosyl-l-methionine synthetase%2C Histone H3K4me3 and DNA methylation%2C Regulation of gene expression related to flowerin	K00789 S-adenosylmethionine synthetase [EC:2.5.1.6] | (RefSeq) S-adenosylmethionine synthase 3 (A)	ko00270: Cysteine and methionine metabolism; ko00999: Biosynthesis of various plant secondary metabolites; ko01100: Metabolic pathways; ko01110: Biosynthesis of secondary metabolites; ko01230: Biosynthesis of amino acids; ko01240: Biosynthesis of cofactors	--	METK3_ORYSJ RecName: Full=S-adenosylmethionine synthase 3; Short=AdoMet synthase 3; EC=2.5.1.6 {ECO:0000250|UniProtKB:Q96551}; AltName: Full=Methionine adenosyltransferase 3; Short=MAT 3;	A0A0E0MV06_ORYRU RecName: Full=S-adenosylmethionine synthase {ECO:0000256|RuleBase:RU000541}; EC=2.5.1.6 {ECO:0000256|RuleBase:RU000541};	At1g02500	GO:0005829,cytosol; GO:0005524,ATP binding; GO:0046872,metal ion binding; GO:0004478,methionine adenosyltransferase activity; GO:0006730,one-carbon metabolic process; GO:0006556,S-adenosylmethionine biosynthetic process; GO:0000166,nucleotide binding; GO:0003674,molecular_function; GO:0005488,binding; GO:0017076,purine nucleotide binding; GO:0030554,adenyl nucleotide binding; GO:0032553,ribonucle…
Os01g0293800	3.5634	5.9261	4.74475	7.1812	2.5843	3.3436	16.6382	17.3496	15.9268	4.9636	16.0577	47.1901	31	53	42	67	35	40	182.5	212	153	70	215	645	-0.108336	0.807953	0.899894	false	1.8516	6.35892e-16	9.78781e-15	up	2.33496	0.00833113	0.0261416	up	1	10696304	10701348	+	Os01g0293800	Hypothetical protein	--	--	--	--	A0A0P0V1U8_ORYSJ SubName: Full=Os01g0293800 protein {ECO:0000313|EMBL:BAS71672.1}; Flags: Fragment;	--	--
Os01g0293900	11.8131	20.7243	16.2687	21.3413	9.7561	12.6554	40.9072	44.7544	37.0599	13.7934	54.3443	113.385	112	202	157	217	144	165	492	596	388	212	793	1689	-0.139627	0.651288	0.799259	false	1.37665	8.21466e-14	1.06264e-12	up	1.96721	0.0161777	0.0454012	up	1	10701626	10703130	-	prx8	Similar to peroxidase 1	K00430 peroxidase [EC:1.11.1.7] | (RefSeq) peroxidase 2 (A)	ko00940: Phenylpropanoid biosynthesis; ko01100: Metabolic pathways; ko01110: Biosynthesis of secondary metabolites	--	PER14_ARATH RecName: Full=Peroxidase 14; Short=Atperox P14; EC=1.11.1.7; Flags: Precursor;	A0A0N7KCT0_ORYSJ SubName: Full=Os01g0293900 protein {ECO:0000313|EMBL:BAS71673.1};	At2g18140	GO:0005618,cell wall; GO:0005576,extracellular region; GO:0020037,heme binding; GO:0046872,metal ion binding; GO:0004601,peroxidase activity; GO:0042744,hydrogen peroxide catabolic process; GO:0006979,response to oxidative stress; GO:0003674,molecular_function; GO:0005488,binding; GO:0046906,tetrapyrrole binding; GO:0097159,organic cyclic compound binding; GO:1901363,heterocyclic compound binding…
Os01g0294700	0.6191	2.0645	1.3418	0.2474	0	0.4502	2.6246	1.1648	4.0844	3.1095	6.5217	12.7773	14	48	31	6	0	14	69.5	37	102	114	227	454	-2.52932	0.00199	0.0112366	down	0.984278	0.0442796	0.0888969	false	2.54366	4.66678e-07	4.47861e-06	up	1	10748692	10750233	-	OsPOD	Haem peroxidase%2C plant/fungal/bacterial family protein	K00430 peroxidase [EC:1.11.1.7] | (RefSeq) peroxidase 2 (A)	ko00940: Phenylpropanoid biosynthesis; ko01100: Metabolic pathways; ko01110: Biosynthesis of secondary metabolites	--	PER2_MAIZE RecName: Full=Peroxidase 2; EC=1.11.1.7; AltName: Full=Plasma membrane-bound peroxidase 2; Short=pmPOX2; Flags: Precursor;	A0A0P0V1A3_ORYSJ RecName: Full=Peroxidase {ECO:0000256|ARBA:ARBA00012313, ECO:0000256|RuleBase:RU362060}; EC=1.11.1.7 {ECO:0000256|ARBA:ARBA00012313, ECO:0000256|RuleBase:RU362060};	At4g33420	GO:0005576,extracellular region; GO:0009505,plant-type cell wall; GO:0009506,plasmodesma; GO:0020037,heme binding; GO:0046872,metal ion binding; GO:0004601,peroxidase activity; GO:0032922,circadian regulation of gene expression; GO:0097167,circadian regulation of translation; GO:0042744,hydrogen peroxide catabolic process; GO:0042752,regulation of circadian rhythm; GO:0006979,response to oxidativ…
Os01g0296166	0.3863	0.2049	0.2956	1.0805	0.6316	1.2768	1.3281	1.575	1.0812	1.7113	1.369	1.3187	11	6	8.5	33	28	50	48.5	63	34	79	60	59	1.8003	0.00117899	0.00720928	up	2.24969	6.43659e-07	3.85356e-06	up	2.3938	3.07155e-07	3.0503e-06	up	1	10830074	10832018	-	Os01g0296166	Hypothetical protein	K01184 polygalacturonase [EC:3.2.1.15] | (RefSeq) polygalacturonase-like (A)	ko00040: Pentose and glucuronate interconversions; ko01100: Metabolic pathways	--	PGLR4_ARATH RecName: Full=Polygalacturonase At1g48100; Short=PG; EC=3.2.1.15; AltName: Full=Pectinase At1g48100; Flags: Precursor;	A0A0P0V1G9_ORYSJ SubName: Full=Os01g0296200 protein {ECO:0000313|EMBL:BAS71688.1}; Flags: Fragment;	At1g02460	GO:0005618,cell wall; GO:0005576,extracellular region; GO:0004650,polygalacturonase activity; GO:0005975,carbohydrate metabolic process; GO:0009831,plant-type cell wall modification involved in multidimensional cell growth; GO:0003674,molecular_function; GO:0003824,catalytic activity; GO:0004553,hydrolase activity, hydrolyzing O-glycosyl compounds; GO:0016787,hydrolase activity; GO:0016798,hydrol…
Os01g0297200	11.9931	12.9055	12.4493	7.9224	6.4443	5.2755	5.6073	5.1184	6.0962	6.5716	8.0471	4.2222	367	406	386.5	260	307	222	213	220	206	326	379	203	-0.908538	2.98155e-07	4.82141e-06	false	-1.1154	2.62833e-16	4.18051e-15	down	-0.93695	1.42138e-05	9.92719e-05	false	1	10891810	10893684	+	Os01g0297200	ATPase%2C AAA-type%2C core domain containing protein	K08900 mitochondrial chaperone BCS1 | (RefSeq) AAA-ATPase At3g50940 (A)	--	--	ASD_ARATH RecName: Full=AAA-ATPase ASD, mitochondrial; EC=3.6.1.- {ECO:0000269|PubMed:21359673}; AltName: Full=AAA-ATPase 1; AltName: Full=Protein ATPASE-IN-SEED-DEVELOPMENT {ECO:0000303|PubMed:21359673};	Q94IX9_ORYSJ SubName: Full=Os01g0297200 protein {ECO:0000313|EMBL:BAS71692.1}; SubName: Full=cDNA clone:002-149-D07, full insert sequence {ECO:0000313|EMBL:BAG98946.1};	At5g40010	GO:0005783,endoplasmic reticulum; GO:0016021,integral component of membrane; GO:0031966,mitochondrial membrane; GO:0005739,mitochondrion; GO:0005524,ATP binding; GO:0016887,ATPase activity; GO:0010154,fruit development; GO:0009737,response to abscisic acid; GO:0009409,response to cold; GO:0009651,response to salt stress; GO:0009414,response to water deprivation; GO:0010431,seed maturation; GO:000…
Os01g0298400	0.8576	1.6163	1.23695	0	0.1033	0.3508	0.0867	0.0763	0.0971	0.1984	0.1045	0.1023	16	31	23.5	0	3	9	2	2	2	6	3	3	-2.98213	0.000147867	0.00123441	down	-3.82217	5.54277e-07	3.34752e-06	down	-3.15036	3.93905e-06	3.09927e-05	down	1	10934895	10935992	+	Os01g0298400	Myb transcription factor domain containing protein	K09422 transcription factor MYB, plant | (RefSeq) transcription factor MYB108 (A)	--	--	MYB2_ORYSJ RecName: Full=Transcription factor MYB2 {ECO:0000305}; AltName: Full=Myb-related protein 2 {ECO:0000305}; Short=OsMYB2 {ECO:0000303|PubMed:22301384};	A0A0N7KCT3_ORYSJ SubName: Full=Os01g0298400 protein {ECO:0000313|EMBL:BAF04724.1}; SubName: Full=Putative typical P-type R2R3 Myb protein {ECO:0000313|EMBL:BAB67851.1};	At5g49620	GO:0005634,nucleus; GO:0003700,DNA-binding transcription factor activity; GO:0043565,sequence-specific DNA binding; GO:1901002,positive regulation of response to salt stress; GO:1902584,positive regulation of response to water deprivation; GO:0045893,positive regulation of transcription, DNA-templated; GO:0006355,regulation of transcription, DNA-templated; GO:0009409,response to cold; GO:0003674,…
Os01g0299100	11.4878	4.4535	7.97065	9.6249	4.1174	17.3736	28.7146	21.395	36.0342	25.5215	31.587	65.8056	138	55	96.5	124	77	287	419.5	361	478	497	584	1242	0.401259	0.370405	0.567835	false	1.88446	7.50676e-11	7.37981e-10	up	2.42811	2.69732e-05	0.000177024	up	1	10960528	10961310	-	Os01g0299100	Conserved hypothetical protein	--	--	--	--	Q943X6_ORYSJ SubName: Full=Uncharacterized protein {ECO:0000313|EMBL:BAB67857.1};	--	--
Os01g0300900	6.5126	5.7589	6.13575	3.5372	2.9861	5.4216	7.8744	8.0242	7.7246	10.4425	11.4121	16.1757	297	270	283.5	173	212	340	451.5	514	389	772	801	1159	-0.605732	0.00626555	0.0284315	false	0.403583	0.000875706	0.00294674	false	1.10449	1.38977e-08	1.79649e-07	up	1	11058878	11063872	+	Os01g0300900	Galactose oxidase/kelch%2C beta-propeller domain containing protein	K20285 Rab9 effector protein with kelch motifs | (RefSeq) acyl-CoA-binding domain-containing protein 4 (A)	--	--	ACBP4_ARATH RecName: Full=Acyl-CoA-binding domain-containing protein 4; Short=Acyl-CoA binding protein 4;	A0A0P0V1C2_ORYSJ SubName: Full=Os01g0300900 protein {ECO:0000313|EMBL:BAF04733.1}; SubName: Full=Putative p40 {ECO:0000313|EMBL:BAB60943.1};	At3g05420_2	GO:0005737,cytoplasm; GO:0005829,cytosol; GO:0005634,nucleus; GO:0000062,fatty-acyl-CoA binding; GO:0008289,lipid binding; GO:0006869,lipid transport; GO:0009723,response to ethylene; GO:0009753,response to jasmonic acid; GO:0009416,response to light stimulus; GO:0000166,nucleotide binding; GO:0003674,molecular_function; GO:0005488,binding; GO:0017076,purine nucleotide binding; GO:0030554,adenyl …
Os01g0301900	42.9929	33.6993	38.3461	59.1588	63.1425	66.3224	82.3774	73.8467	90.9081	59.9937	83.6665	58.8458	206	166	186	304	471	437	489	497	481	466	617	443	0.735172	4.32402e-06	5.4301e-05	false	1.14047	2.08296e-13	2.61509e-12	up	0.869064	1.03058e-05	7.4421e-05	false	1	11110199	11110480	-	Os01g0301900	Protein of unknown function DUF247%2C plant domain containing protein	--	--	--	--	A0A0P0V1F9_ORYSJ SubName: Full=Os01g0301900 protein {ECO:0000313|EMBL:BAS71726.1};	At3g50120	GO:0016021,integral component of membrane; GO:0005575,cellular_component; GO:0016020,membrane; GO:0031224,intrinsic component of membrane; GO:0110165,cellular anatomical entity
Os01g0302000	47.3393	38.8292	43.0842	78.3795	98.7862	89.4115	117.482	99.287	135.677	99.6026	114.137	81.9221	370	312	341	657	1202	961	1130.5	1090	1171	1262	1373	1006	1.06611	2.51668e-14	1.163e-12	up	1.48273	2.52511e-23	6.16205e-22	up	1.24551	1.11174e-15	3.89391e-14	up	1	11118689	11119272	+	Os01g0302000	Hypothetical conserved gene	--	--	--	--	A0A0P0V1W6_ORYSJ SubName: Full=Os01g0302000 protein {ECO:0000313|EMBL:BAS71727.1}; Flags: Fragment;	--	--
Os01g0303600	0.8408	1.1324	0.9866	1.2061	0.9555	1.1758	2.34955	1.8878	2.8113	0.8378	0.9665	2.6757	13	18	15.5	20	23	25	44.5	41	48	21	23	65	0.172313	0.727101	0.851367	false	1.25776	0.00134647	0.00432521	up	0.647615	0.273739	0.414032	false	1	11231975	11234809	-	OsRFPV-1	Zinc finger%2C RING/FYVE/PHD-type domain containing protein	K10661 E3 ubiquitin-protein ligase MARCH6 [EC:2.3.2.27] | (RefSeq) probable E3 ubiquitin ligase SUD1 (A)	ko04141: Protein processing in endoplasmic reticulum	--	SUD1_ARATH RecName: Full=Probable E3 ubiquitin ligase SUD1; EC=2.3.2.27; AltName: Full=Protein ECERIFERUM 9; AltName: Full=Protein SUPPRESSOR OF DRY2 DEFFECTS 1; Short=AtSUD1; AltName: Full=RING-type E3 ubiquitin transferase SUD1 {ECO:0000305}; AltName: Full=RING/U-box domain-containing protein;	A0A5S6R7T7_ORYSJ SubName: Full=Os01g0303600 protein {ECO:0000313|EMBL:BAF04748.2}; SubName: Full=Zinc finger protein-like {ECO:0000313|EMBL:BAD44897.1};	At2g02960	GO:0030176,integral component of endoplasmic reticulum membrane; GO:0004842,ubiquitin-protein transferase activity; GO:0008270,zinc ion binding; GO:0042335,cuticle development; GO:0010143,cutin biosynthetic process; GO:0008299,isoprenoid biosynthetic process; GO:1900490,positive regulation of hydroxymethylglutaryl-CoA reductase (NADPH) activity; GO:0009414,response to water deprivation; GO:001034…
Os01g0303800	6.149	6.9495	6.54925	6.1157	4.2883	2.981	4.081	4.5028	3.6592	1.6979	1.56	1.4164	105	122	113.5	112	114	70	88.5	108	69	47	41	38	-0.540225	0.0590268	0.160715	false	-0.636467	0.00162695	0.0051181	false	-2.02093	3.0184e-15	1.00457e-13	down	1	11245253	11246737	+	Os01g0303800	UspA domain containing protein	--	--	--	USPAL_ARATH RecName: Full=Universal stress protein A-like protein;	A0A0E0MV77_ORYRU RecName: Full=Usp domain-containing protein {ECO:0000259|Pfam:PF00582};	At3g62550	GO:0005829,cytosol; GO:0005886,plasma membrane; GO:0016208,AMP binding; GO:0000166,nucleotide binding; GO:0003674,molecular_function; GO:0005488,binding; GO:0017076,purine nucleotide binding; GO:0030554,adenyl nucleotide binding; GO:0032553,ribonucleotide binding; GO:0032555,purine ribonucleotide binding; GO:0032559,adenyl ribonucleotide binding; GO:0036094,small molecule binding; GO:0043167,ion …
Os01g0304050	0.4142	0.3861	0.40015	0.1609	0.1774	0.2134	0.18595	0.1843	0.1876	0.2981	0.157	0.1538	24	23	23.5	10	16	17	13.5	15	12	28	14	14	-1.10782	0.0231405	0.0792349	false	-1.05733	0.0167482	0.0391811	down	-0.938572	0.058815	0.128403	false	1	11253627	11266197	+	Os01g0304050	Non-protein coding transcript	--	--	--	CCC2_ORYSJ RecName: Full=Cation-chloride cotransporter 2; Short=OsCCC2; AltName: Full=Potassium-chloride cotransporter 2;	A0A0E0MV83_ORYRU SubName: Full=Uncharacterized protein {ECO:0000313|EnsemblPlants:ORUFI01G13830.4};	At1g30450_1	GO:0016021,integral component of membrane; GO:0015379,potassium:chloride symporter activity; GO:0006884,cell volume homeostasis; GO:0055064,chloride ion homeostasis; GO:1902476,chloride transmembrane transport; GO:0055075,potassium ion homeostasis; GO:1990573,potassium ion import across plasma membrane; GO:0003674,molecular_function; GO:0005215,transporter activity; GO:0008324,cation transmembran…
Os01g0305200	23.6571	25.7243	24.6907	53.6222	42.4998	48.5328	48.4101	38.82	58.0002	39.1527	50.4865	55.1486	246	275	260.5	598	688	694	616.5	567	666	660	808	901	0.985618	1.75717e-11	5.52999e-10	false	1.00443	1.52149e-09	1.28586e-08	up	1.02465	2.1805e-09	3.25988e-08	up	1	11316720	11320061	+	Os01g0305200	Lg106-like family protein	--	--	--	--	A0A5S6R8U9_ORYSJ SubName: Full=Os01g0305200 protein {ECO:0000313|EMBL:BAF04755.2};	At1g69510	--
Os01g0307500	2.9386	3.3348	3.1367	8.4232	4.4045	4.5905	9.9555	8.601	11.31	5.8746	8.097	9.9753	108	126	117	332	252	232	451.5	444	459	350	458	576	0.908398	0.00078572	0.00511626	false	1.70123	2.90214e-24	7.38202e-23	up	1.40613	1.31399e-09	2.03062e-08	up	1	11458956	11463442	-	SKC1	Na<sup>+</sup> transporter%2C A member of HKT (high-affinity K<sup>+</sup> transporter)-type transporters%2C Regulation of K<sup>+</sup>/Na<sup>+</sup> homeostasis%2C Salt toleranc	K24976 Trk/Ktr/HKT type cation transporter | (RefSeq) cation transporter HKT8 (A)	--	--	HKT8_ORYSI RecName: Full=Cation transporter HKT8; Short=OsHKT8; AltName: Full=HKT1;5;	A0A0E0MVA4_ORYRU SubName: Full=Uncharacterized protein {ECO:0000313|EnsemblPlants:ORUFI01G14000.1};	At4g10310	GO:0016021,integral component of membrane; GO:0008324,cation transmembrane transporter activity; GO:0006814,sodium ion transport; GO:0003674,molecular_function; GO:0005215,transporter activity; GO:0015075,ion transmembrane transporter activity; GO:0022857,transmembrane transporter activity; GO:0006810,transport; GO:0006811,ion transport; GO:0006812,cation transport; GO:0008150,biological_process;…
Os01g0307686	23.8445	25.955	24.8998	15.2928	20.9488	19.4955	8.184	9.97	6.398	15.4482	8.9759	10.5191	378	423	400.5	260	517	425	167	222	112	397	219	262	-0.398727	0.0085403	0.0363219	false	-1.54547	8.08967e-22	1.82228e-20	down	-1.04486	1.80967e-07	1.88349e-06	down	1	11505079	11506118	-	Os01g0307686	Similar to embryonic abundant protein-like	--	--	--	--	A0A0E0MVA8_ORYRU RecName: Full=Methyltransf_11 domain-containing protein {ECO:0000259|Pfam:PF08241};	At2g41380	GO:0005739,mitochondrion; GO:0008168,methyltransferase activity; GO:0046686,response to cadmium ion; GO:0003674,molecular_function; GO:0003824,catalytic activity; GO:0016740,transferase activity; GO:0016741,transferase activity, transferring one-carbon groups; GO:0008150,biological_process; GO:0010035,response to inorganic substance; GO:0010038,response to metal ion; GO:0042221,response to chemic…
Os01g0311100	24.091	23.0519	23.5714	12.1462	11.5935	10.4428	11.6238	8.3243	14.9233	14.28	14.4291	9.7394	307	302	304.5	166	230	183	179.5	149	210	295	283	195	-1.02916	5.09279e-11	1.50931e-09	down	-0.993314	1.14775e-06	6.60649e-06	false	-0.827909	5.40781e-06	4.11602e-05	false	1	11686442	11687191	+	OsRFPH2-4	Similar to RING-H2 finger protein ATL2L	K16286 E3 ubiquitin-protein ligase EL5 [EC:2.3.2.27] | (RefSeq) E3 ubiquitin-protein ligase EL5-like (A)	--	--	ATL64_ARATH RecName: Full=RING-H2 finger protein ATL64; EC=2.3.2.27 {ECO:0000305}; AltName: Full=RING-type E3 ubiquitin transferase ATL64 {ECO:0000305};	A0A0P0V1P8_ORYSJ RecName: Full=RING-type E3 ubiquitin transferase {ECO:0000256|ARBA:ARBA00012483}; EC=2.3.2.27 {ECO:0000256|ARBA:ARBA00012483};	At2g47560	GO:0016021,integral component of membrane; GO:0046872,metal ion binding; GO:0016740,transferase activity; GO:0031625,ubiquitin protein ligase binding; GO:0016567,protein ubiquitination; GO:0003674,molecular_function; GO:0005488,binding; GO:0043167,ion binding; GO:0043169,cation binding; GO:0003824,catalytic activity; GO:0005515,protein binding; GO:0019899,enzyme binding; GO:0044389,ubiquitin-like…
Os01g0311600	0.6693	0.1628	0.41605	1.4431	1.236	0.9125	1.5439	1.0423	2.0455	1.7804	2.9896	2.3961	16	4	10	37	46	30	44.5	35	54	69	110	90	1.54974	0.00594546	0.0273053	up	1.91493	0.000188274	0.000733528	up	2.58176	1.74903e-07	1.8277e-06	up	1	11703247	11704653	-	Os01g0311600	Sulfotransferase family protein	K22312 hydroxyjasmonate sulfotransferase [EC:2.8.2.39] | (RefSeq) cytosolic sulfotransferase 12 (A)	--	--	SOT5_ARATH RecName: Full=Cytosolic sulfotransferase 5; Short=AtSOT5; EC=2.8.2.-; AltName: Full=Flavonoid 7-sulfotransferase 3a; Short=AtST3a;	Q0JNA1_ORYSJ RecName: Full=Sulfotransferase {ECO:0000256|RuleBase:RU361155}; EC=2.8.2.- {ECO:0000256|RuleBase:RU361155};	At3g45070	GO:0005737,cytoplasm; GO:1990135,flavonoid sulfotransferase activity; GO:0008146,sulfotransferase activity; GO:0009812,flavonoid metabolic process; GO:0051923,sulfation; GO:0003674,molecular_function; GO:0003824,catalytic activity; GO:0016740,transferase activity; GO:0016782,transferase activity, transferring sulfur-containing groups; GO:0008150,biological_process; GO:0008152,metabolic process; G…
Os01g0313300	21.1305	10.0878	15.6091	1.0879	2.7063	15.2717	0.35865	0.5999	0.1174	2.559	0.3369	0.4951	326	160	243	18	65	324	7.5	13	2	64	8	12	-1.28615	0.215743	0.398886	false	-5.28291	3.51628e-37	1.65746e-35	down	-3.75124	2.14068e-05	0.000144131	down	1	11783910	11784899	+	OsERF#068	Similar to EREBP-3 protein (Fragment)	K09286 EREBP-like factor | (RefSeq) ethylene-responsive transcription factor RAP2-3 (A)	--	--	ERF71_ARATH RecName: Full=Ethylene-responsive transcription factor ERF071 {ECO:0000305}; Short=AtERF71 {ECO:0000303|PubMed:25344007}; AltName: Full=Protein HYPOXIA RESPONSIVE ERF 2 {ECO:0000303|PubMed:20113439};	Q8LQ87_ORYSJ SubName: Full=Os01g0313300 protein {ECO:0000313|EMBL:BAS71795.1}; SubName: Full=cDNA clone:J023075G11, full insert sequence {ECO:0000313|EMBL:BAG99412.1};	At2g47520	GO:0005634,nucleus; GO:0003677,DNA binding; GO:0003700,DNA-binding transcription factor activity; GO:0071456,cellular response to hypoxia; GO:0009873,ethylene-activated signaling pathway; GO:2000280,regulation of root development; GO:0034059,response to anoxia; GO:0003674,molecular_function; GO:0003676,nucleic acid binding; GO:0005488,binding; GO:0097159,organic cyclic compound binding; GO:190136…
Os01g0322700	72.9769	76.2326	74.6047	13.9031	35.5469	56.1536	11.3938	14.4992	8.2883	30.8463	17.4855	47.4897	1204	1293	1248.5	246	913	1274	243.5	336	151	825	444	1231	-1.07005	0.0454678	0.132518	false	-2.64897	4.5473e-65	4.79863e-63	down	-1.16385	0.00411335	0.0144007	down	1	12301586	12302556	+	Os01g0322700	Non-protein coding transcript	--	--	--	--	--	--	--
Os01g0323000	2.3187	0.9123	1.6155	1.822	2.3597	4.1112	3.32325	2.8008	3.8457	5.6732	3.3178	8.0756	89	36	62.5	75	141	217	157	151	163	353	196	487	0.799531	0.036416	0.112382	false	1.0803	0.000340605	0.00125738	up	1.87894	6.95499e-07	6.44459e-06	up	1	12326546	12331707	+	Os01g0323000	Similar to Ser Thr specific protein kinase-like protein	K13430 serine/threonine-protein kinase PBS1 [EC:2.7.11.1] | (RefSeq) serine/threonine-protein kinase PBS1 (A)	ko04626: Plant-pathogen interaction	--	Y5185_ARATH RecName: Full=Probable receptor-like protein kinase At5g18500; EC=2.7.11.1;	A0A0P0V287_ORYSJ SubName: Full=Os01g0323000 protein {ECO:0000313|EMBL:BAF04808.1}; SubName: Full=Receptor protein kinase PERK1-like protein {ECO:0000313|EMBL:BAB21240.1};	At1g56720	GO:0016021,integral component of membrane; GO:0005886,plasma membrane; GO:0005524,ATP binding; GO:0106310,protein serine kinase activity; GO:0106311,protein threonine kinase activity; GO:0000166,nucleotide binding; GO:0003674,molecular_function; GO:0005488,binding; GO:0017076,purine nucleotide binding; GO:0030554,adenyl nucleotide binding; GO:0032553,ribonucleotide binding; GO:0032555,purine ribo…
Os01g0323100	4.1644	0.8545	2.50945	0.0303	0.1254	3.1939	0.14315	0.139	0.1473	0.2208	0.0211	0.3313	128	27	77.5	1	6	135	5.5	6	5	11	1	16	-1.16293	0.474991	0.663166	false	-4.05332	4.62892e-12	5.13455e-11	down	-3.65765	1.53554e-07	1.62639e-06	down	1	12332795	12337225	-	OsPti1b	Similar to Pto kinase interactor 1	K13436 pto-interacting protein 1 [EC:2.7.11.1] | (RefSeq) pto-interacting protein 1 (A)	ko04626: Plant-pathogen interaction	--	PTI1_SOLLC RecName: Full=Pto-interacting protein 1; Short=Pti1 {ECO:0000303|PubMed:8521516}; EC=2.7.11.1 {ECO:0000269|PubMed:8521516}; AltName: Full=Pto kinase interactor 1 {ECO:0000312|EMBL:AAC61805.1};	A0A0D9Y7M2_9ORYZ RecName: Full=Protein kinase domain-containing protein {ECO:0000259|PROSITE:PS50011};	At3g17410	GO:0005524,ATP binding; GO:0106310,protein serine kinase activity; GO:0106311,protein threonine kinase activity; GO:0009626,plant-type hypersensitive response; GO:0000166,nucleotide binding; GO:0003674,molecular_function; GO:0005488,binding; GO:0017076,purine nucleotide binding; GO:0030554,adenyl nucleotide binding; GO:0032553,ribonucleotide binding; GO:0032555,purine ribonucleotide binding; GO:0…
Os01g0323500	0.8456	1.4394	1.1425	0.2365	0.4617	0.3382	0.20105	0.2107	0.1914	0.1826	0.1923	0.5382	20	35	27.5	6	17	11	6	7	5	7	7	20	-1.6948	0.00134711	0.00807677	down	-2.46914	4.59845e-06	2.39393e-05	down	-1.85557	0.00184213	0.00727917	down	1	12351672	12353063	-	Os01g0323500	Conserved hypothetical protein	--	--	--	--	A0A0E0FL47_ORYNI SubName: Full=Uncharacterized protein {ECO:0000313|EnsemblPlants:ONIVA01G16490.1};	--	--
Os01g0326000	0.8784	0.4476	0.663	1.3651	0.6717	1.308	1.6671	1.2508	2.0834	1.3676	1.3589	1.0649	21	11	16	35	25	43	48.5	42	55	53	50	40	0.765685	0.130773	0.284268	false	1.35377	0.000973482	0.00323349	up	0.984224	0.0264129	0.0676355	false	1	12499923	12504209	+	prx12	Similar to Peroxidase (Fragment)	K00430 peroxidase [EC:1.11.1.7] | (RefSeq) peroxidase 1 (A)	ko00940: Phenylpropanoid biosynthesis; ko01100: Metabolic pathways; ko01110: Biosynthesis of secondary metabolites	--	PER1_MAIZE RecName: Full=Peroxidase 1; EC=1.11.1.7; AltName: Full=Plasma membrane-bound peroxidase 1; Short=pmPOX1; Flags: Precursor;	Q654S1_ORYSJ RecName: Full=Peroxidase {ECO:0000256|ARBA:ARBA00012313, ECO:0000256|RuleBase:RU362060}; EC=1.11.1.7 {ECO:0000256|ARBA:ARBA00012313, ECO:0000256|RuleBase:RU362060};	At1g05260	GO:0005576,extracellular region; GO:0009505,plant-type cell wall; GO:0009506,plasmodesma; GO:0005773,vacuole; GO:0020037,heme binding; GO:0046872,metal ion binding; GO:0004601,peroxidase activity; GO:0042744,hydrogen peroxide catabolic process; GO:0006979,response to oxidative stress; GO:0003674,molecular_function; GO:0005488,binding; GO:0046906,tetrapyrrole binding; GO:0097159,organic cyclic com…
Os01g0327000	1.4376	1.9674	1.7025	0.6564	0.3949	0.3893	0.49905	0.4235	0.5746	1.2599	0.6506	0.7194	145	204	174.5	71	62	54	62	60	64	206	101	114	-1.81771	1.32433e-11	4.21892e-10	down	-1.74182	1.92844e-15	2.85032e-14	down	-0.907024	0.000982988	0.0042169	false	1	12551333	12557268	+	prx14	Similar to Class III peroxidase 14	K00430 peroxidase [EC:1.11.1.7] | (RefSeq) peroxidase 1 (A)	ko00940: Phenylpropanoid biosynthesis; ko01100: Metabolic pathways; ko01110: Biosynthesis of secondary metabolites	--	PER1_MAIZE RecName: Full=Peroxidase 1; EC=1.11.1.7; AltName: Full=Plasma membrane-bound peroxidase 1; Short=pmPOX1; Flags: Precursor;	Q0JN58_ORYSJ SubName: Full=Os01g0327000 protein {ECO:0000313|EMBL:BAF04820.2}; Flags: Fragment;	At1g44970	GO:0005576,extracellular region; GO:0009505,plant-type cell wall; GO:0009506,plasmodesma; GO:0005773,vacuole; GO:0020037,heme binding; GO:0046872,metal ion binding; GO:0004601,peroxidase activity; GO:0042744,hydrogen peroxide catabolic process; GO:0006979,response to oxidative stress; GO:0003674,molecular_function; GO:0005488,binding; GO:0046906,tetrapyrrole binding; GO:0097159,organic cyclic com…
Os01g0327100	2.3336	3.3087	2.82115	12.4655	1.5244	4.4582	5.87015	3.717	8.0233	12.7361	9.0974	4.2293	59	86	72.5	338	60	155	178	132	224	522	354	168	1.15743	0.157551	0.323182	false	1.0833	0.00018228	0.000711832	up	1.66947	1.56551e-06	1.34415e-05	up	1	12564283	12570030	+	prx15	Haem peroxidase family protein	K00430 peroxidase [EC:1.11.1.7] | (RefSeq) peroxidase 1 (A)	ko00940: Phenylpropanoid biosynthesis; ko01100: Metabolic pathways; ko01110: Biosynthesis of secondary metabolites	--	PER1_MAIZE RecName: Full=Peroxidase 1; EC=1.11.1.7; AltName: Full=Plasma membrane-bound peroxidase 1; Short=pmPOX1; Flags: Precursor;	Q5U1S8_ORYSJ RecName: Full=Peroxidase {ECO:0000256|ARBA:ARBA00012313, ECO:0000256|RuleBase:RU362060}; EC=1.11.1.7 {ECO:0000256|ARBA:ARBA00012313, ECO:0000256|RuleBase:RU362060};	At5g64120	GO:0005576,extracellular region; GO:0009505,plant-type cell wall; GO:0009506,plasmodesma; GO:0005773,vacuole; GO:0020037,heme binding; GO:0046872,metal ion binding; GO:0004601,peroxidase activity; GO:0042744,hydrogen peroxide catabolic process; GO:0006979,response to oxidative stress; GO:0003674,molecular_function; GO:0005488,binding; GO:0046906,tetrapyrrole binding; GO:0097159,organic cyclic com…
Os01g0329900	6.1227	4.3029	5.2128	6.6651	5.2125	11.8447	10.8958	9.3229	12.4688	14.2944	10.6972	26.1601	209	151	180	244	277	556	458.5	447	470	791	562	1403	0.619859	0.0268508	0.0887487	false	1.09879	8.15184e-10	7.122e-09	up	1.77108	2.72714e-09	4.00545e-08	up	1	12734098	12738081	+	OsGELP14	Similar to Lipase homolog (Fragment)	--	--	--	GDL2_ARATH RecName: Full=GDSL esterase/lipase At1g09390; EC=3.1.1.-; AltName: Full=Extracellular lipase At1g09390; Flags: Precursor;	Q0JN40_ORYSJ SubName: Full=Os01g0329900 protein {ECO:0000313|EMBL:BAF04838.1}; SubName: Full=Putative early nodule-specific protein ENOD8 {ECO:0000313|EMBL:BAD54714.1};	At1g09390	GO:0009570,chloroplast stroma; GO:0005576,extracellular region; GO:0016788,hydrolase activity, acting on ester bonds; GO:0016042,lipid catabolic process; GO:0003674,molecular_function; GO:0003824,catalytic activity; GO:0016787,hydrolase activity; GO:0006629,lipid metabolic process; GO:0008150,biological_process; GO:0008152,metabolic process; GO:0009056,catabolic process; GO:0044238,primary metabo…
Os01g0330100	0.3167	0.2311	0.2739	0.5168	0.7503	0.835	0.611	0.6483	0.5737	0.7449	0.5531	0.4788	16	12	14	28	59	58	39	46	32	61	43	38	1.38121	0.00180889	0.0104001	up	1.20589	0.00256353	0.00765824	up	1.16412	0.00942402	0.0290774	up	1	12742212	12745509	+	OsGELP15	Similar to Alpha-L-fucosidase 2	--	--	--	GDL2_ARATH RecName: Full=GDSL esterase/lipase At1g09390; EC=3.1.1.-; AltName: Full=Extracellular lipase At1g09390; Flags: Precursor;	B7EQI1_ORYSJ SubName: Full=cDNA clone:J023095I15, full insert sequence {ECO:0000313|EMBL:BAG94628.1};	At1g09390	GO:0009570,chloroplast stroma; GO:0005576,extracellular region; GO:0016788,hydrolase activity, acting on ester bonds; GO:0016042,lipid catabolic process; GO:0003674,molecular_function; GO:0003824,catalytic activity; GO:0016787,hydrolase activity; GO:0006629,lipid metabolic process; GO:0008150,biological_process; GO:0008152,metabolic process; GO:0009056,catabolic process; GO:0044238,primary metabo…
Os01g0337500	6.5091	10.5893	8.5492	0.3807	0.3642	0.3958	0.4058	0.5651	0.2465	1.1612	0.4421	0.8228	287	480	383.5	18	25	24	23.5	35	12	83	30	57	-4.47468	8.3166e-61	8.10279e-58	down	-4.30023	4.75958e-57	4.30512e-55	down	-3.34929	5.72249e-29	5.79607e-27	down	1	13237248	13246058	+	Os01g0337500	Similar to H+-pyrophosphatase (Fragment)	K23025 H+-translocating diphosphatase [EC:7.1.3.1] | (RefSeq) pyrophosphate-energized vacuolar membrane proton pump (A)	--	--	AVP_HORVU RecName: Full=Pyrophosphate-energized vacuolar membrane proton pump; EC=7.1.3.1; AltName: Full=Pyrophosphate-energized inorganic pyrophosphatase; Short=H(+)-PPase;	Q0JN26_ORYSJ RecName: Full=H(+)-exporting diphosphatase {ECO:0000256|ARBA:ARBA00013242}; EC=7.1.3.1 {ECO:0000256|ARBA:ARBA00013242};	At1g15690	GO:0016021,integral component of membrane; GO:0005774,vacuolar membrane; GO:0004427,inorganic diphosphatase activity; GO:0046872,metal ion binding; GO:0009678,pyrophosphate hydrolysis-driven proton transmembrane transporter activity; GO:0003674,molecular_function; GO:0003824,catalytic activity; GO:0016462,pyrophosphatase activity; GO:0016787,hydrolase activity; GO:0016817,hydrolase activity, acti…
Os01g0339500	5.6889	5.3018	5.49535	13.7472	13.6221	10.548	11.2308	12.0232	10.4383	6.7245	9.7535	9.2511	191	183	187	495	712	487	477	567	387	366	504	488	1.22286	1.54003e-13	6.43044e-12	up	1.07846	1.09928e-16	1.80722e-15	up	0.698335	0.000302001	0.00149956	false	1	13342969	13345864	-	ONAC030	Similar to No apical meristem protein	--	--	--	--	Q0JN18_ORYSJ SubName: Full=Os01g0339500 protein {ECO:0000313|EMBL:BAS71962.1}; SubName: Full=cDNA clone:J013052A02, full insert sequence {ECO:0000313|EMBL:BAG89824.1};	--	--
Os01g0341000	5.4666	1.9726	3.7196	9.4957	7.5327	7.0209	7.8569	6.8109	8.9029	5.2214	7.0751	7.8567	124	46	85	231	266	219	220	217	223	192	247	280	1.13115	0.00034705	0.00255915	up	1.11615	0.00016933	0.000666321	up	0.910514	0.00810547	0.0255515	false	1	13422910	13424625	-	Os01g0341000	Conserved hypothetical protein	--	--	--	EA1_MAIZE RecName: Full=Protein EGG APPARATUS-1; AltName: Full=ZmEA1;	A0A0P0V2B0_ORYSJ SubName: Full=Os01g0341000 protein {ECO:0000313|EMBL:BAS71973.1};	--	GO:0016021,integral component of membrane; GO:0005575,cellular_component; GO:0016020,membrane; GO:0031224,intrinsic component of membrane; GO:0110165,cellular anatomical entity
Os01g0341200	3.5486	2.0197	2.78415	5.8785	5.8926	5.1611	7.24085	6.2085	8.2732	5.0767	5.617	7.1122	94	55	74.5	167	243	188	236.5	231	242	218	229	296	1.04532	2.34931e-05	0.000246451	up	1.41729	9.67629e-10	8.36482e-09	up	1.15309	1.89364e-05	0.00012912	up	1	13437009	13438567	-	Os01g0341200	Tubulin%2C conserved site domain containing protein	--	--	--	--	Q0JN12_ORYSJ SubName: Full=Os01g0341200 protein {ECO:0000313|EMBL:BAF04866.1};	--	GO:0016021,integral component of membrane; GO:0005575,cellular_component; GO:0016020,membrane; GO:0031224,intrinsic component of membrane; GO:0110165,cellular anatomical entity
Os01g0341300	0.0574	0.279	0.1682	1.4441	1.695	1.2931	1.85195	1.4702	2.2337	1.38	1.1927	1.0953	1	5	3	27	46	31	39.5	36	43	39	32	30	3.14801	6.38606e-06	7.69718e-05	up	3.48662	3.95303e-08	2.80205e-07	up	2.90605	4.765e-05	0.000293927	up	1	13442503	13443528	+	Os01g0341300	Conserved hypothetical protein	--	--	--	--	A0A0E0MVV8_ORYRU SubName: Full=Uncharacterized protein {ECO:0000313|EnsemblPlants:ORUFI01G15930.1};	--	--
Os01g0342750	9.3597	12.6174	10.9886	0.6403	0.6372	1.3132	0.8287	1.1046	0.5528	2.2593	0.628	0.9551	368	510	439	27	39	71	42.5	61	24	144	38	59	-3.64622	1.0722e-45	4.91592e-43	down	-3.65676	2.84344e-64	2.9345e-62	down	-3.05396	2.02134e-18	9.51574e-17	down	1	13524554	13528480	+	Os01g0342750	Hypothetical conserved gene	K05681 ATP-binding cassette, subfamily G (WHITE), member 2 | (RefSeq) ABC transporter G family member 25 (A)	ko02010: ABC transporters	--	AB32G_ORYSJ RecName: Full=ABC transporter G family member 32 {ECO:0000303|PubMed:18299247}; Short=OsABCG32 {ECO:0000303|PubMed:18299247}; AltName: Full=Pleiotropic drug resistance protein 16 {ECO:0000303|PubMed:16506311}; Short=OsPDR16 {ECO:0000303|PubMed:16506311};	A0A0P0V2F0_ORYSJ SubName: Full=Os01g0342750 protein {ECO:0000313|EMBL:BAS71981.1}; Flags: Fragment;	At1g15520	GO:0016021,integral component of membrane; GO:0005524,ATP binding; GO:0042626,ATPase-coupled transmembrane transporter activity; GO:0000166,nucleotide binding; GO:0003674,molecular_function; GO:0005488,binding; GO:0017076,purine nucleotide binding; GO:0030554,adenyl nucleotide binding; GO:0032553,ribonucleotide binding; GO:0032555,purine ribonucleotide binding; GO:0032559,adenyl ribonucleotide bi…
Os01g0351800	4.37	4.2165	4.29325	1.6102	2.3543	2.2552	1.603	1.3549	1.8511	1.7827	2.1982	1.6823	124	123	123.5	49	104	88	56	54	58	82	96	75	-1.02309	1.54662e-05	0.000169548	down	-1.39661	4.45912e-10	4.02094e-09	down	-1.13503	5.78643e-07	5.43061e-06	down	1	14077661	14080700	+	Os01g0351800	2OG-Fe(II) oxygenase domain containing protein	K24028 salicylic acid 3-hydroxylase [EC:1.14.11.-] | (RefSeq) naringenin,2-oxoglutarate 3-dioxygenase (A)	--	--	SRG1_ARATH RecName: Full=Protein SRG1; Short=AtSRG1; AltName: Full=Protein SENESCENCE-RELATED GENE 1;	A2ZSX3_ORYSJ SubName: Full=Os01g0351800 protein {ECO:0000313|EMBL:BAF04900.1}; SubName: Full=Putative iron/ascorbate-dependent oxidoreductase {ECO:0000313|EMBL:BAB89620.1};	At1g17010	GO:0046872,metal ion binding; GO:0016682,oxidoreductase activity, acting on diphenols and related substances as donors, oxygen as acceptor; GO:0010150,leaf senescence; GO:0003674,molecular_function; GO:0005488,binding; GO:0043167,ion binding; GO:0043169,cation binding; GO:0003824,catalytic activity; GO:0016491,oxidoreductase activity; GO:0016679,oxidoreductase activity, acting on diphenols and re…
Os01g0355800	1.6669	2.3698	2.01835	1.076	1.2766	1.2588	0.59315	0.5477	0.6386	1.4237	1.8328	0.8977	26	38	32	18	31	27	11.5	12	11	36	44	22	-0.722172	0.0757536	0.192248	false	-1.71367	8.13176e-05	0.000341709	down	-0.494464	0.243419	0.379307	false	1	14326183	14327100	+	Os01g0355800	Similar to Esterase PIR7A	--	--	--	PIR7B_ORYSI RecName: Full=Esterase PIR7B; EC=3.1.-.-;	A0A0N7KCX9_ORYSJ SubName: Full=Os01g0355800 protein {ECO:0000313|EMBL:BAS72065.1};	At2g23620	GO:0052689,carboxylic ester hydrolase activity; GO:0003674,molecular_function; GO:0003824,catalytic activity; GO:0016787,hydrolase activity; GO:0016788,hydrolase activity, acting on ester bonds
Os01g0357200	0.3136	1.1185	0.71605	2.2419	0.7386	0.3041	1.9377	1.4141	2.4613	0.5159	1.0188	1.1976	3	11	7	23	11	4	22.5	19	26	8	15	18	NA	NA	NA	NA	1.44465	0.015173	0.0360103	up	NA	NA	NA	NA	1	14453690	14454549	+	Os01g0357200	Sterol-binding domain containing protein	--	--	--	SCP2_ARATH RecName: Full=Sterol carrier protein 2 {ECO:0000303|PubMed:15456765}; Short=AtSCP2 {ECO:0000303|PubMed:15456765};	A0A0D3ENN4_9ORYZ RecName: Full=SCP2 domain-containing protein {ECO:0000259|Pfam:PF02036};	At5g42890	GO:0005829,cytosol; GO:0005777,peroxisome; GO:0006635,fatty acid beta-oxidation; GO:0046487,glyoxylate metabolic process; GO:0032365,intracellular lipid transport; GO:0009646,response to absence of light; GO:0009744,response to sucrose; GO:0009845,seed germination; GO:0048317,seed morphogenesis; GO:0006082,organic acid metabolic process; GO:0006629,lipid metabolic process; GO:0006631,fatty acid m…
Os01g0357900	55.3021	41.1496	48.2259	57.2112	55.6445	60.8806	78.9391	74.6055	83.2728	81.0767	91.6915	137.66	685	524	604.5	760	1073	1037	1218.5	1298	1139	1628	1748	2679	0.28538	0.0361423	0.111758	false	0.751416	5.64524e-09	4.46794e-08	false	1.16124	3.07433e-08	3.73275e-07	up	1	14480825	14481553	-	OsRALF-4	Similar to RALF	--	--	--	RLF33_ARATH RecName: Full=Protein RALF-like 33; Flags: Precursor;	A0A0E0MW58_ORYRU SubName: Full=Uncharacterized protein {ECO:0000313|EnsemblPlants:ORUFI01G16790.1};	At3g16570	GO:0048046,apoplast; GO:0009505,plant-type cell wall; GO:0009506,plasmodesma; GO:0005179,hormone activity; GO:0019722,calcium-mediated signaling; GO:0007267,cell-cell signaling; GO:0003674,molecular_function; GO:0005102,signaling receptor binding; GO:0005488,binding; GO:0005515,protein binding; GO:0030545,receptor regulator activity; GO:0030546,signaling receptor activator activity; GO:0048018,re…
Os01g0358100	5.4509	8.9907	7.2208	6.8505	4.6178	5.4001	11.0078	11.6423	10.3733	11.3545	13.6534	21.5203	69	117	93	93	91	94	176	207	145	233	266	428	-0.347004	0.219211	0.402814	false	0.653104	0.00182965	0.00567349	false	1.16307	8.61867e-05	0.00049815	up	1	14486394	14487138	-	OsRALF-6	Rapid ALkalinization Factor family protein	--	--	--	RLF33_ARATH RecName: Full=Protein RALF-like 33; Flags: Precursor;	A2WPU9_ORYSI SubName: Full=Uncharacterized protein {ECO:0000313|EMBL:EAY73995.1};	At3g05490	GO:0048046,apoplast; GO:0009505,plant-type cell wall; GO:0009506,plasmodesma; GO:0005179,hormone activity; GO:0019722,calcium-mediated signaling; GO:0007267,cell-cell signaling; GO:0003674,molecular_function; GO:0005102,signaling receptor binding; GO:0005488,binding; GO:0005515,protein binding; GO:0030545,receptor regulator activity; GO:0030546,signaling receptor activator activity; GO:0048018,re…
Os01g0363300	40.6107	33.6683	37.1395	87.0352	61.2827	51.7034	82.0411	74.4609	89.6213	68.872	89.4697	76.9866	650	554	602	1494	1527	1138	1629	1674	1584	1787	2204	1936	0.867587	4.07515e-06	5.15914e-05	false	1.18195	1.42036e-22	3.34419e-21	up	1.13324	8.60775e-16	3.06538e-14	up	1	14793093	14797054	+	Os01g0363300	Uncharacterised protein family UPF0497%2C trans-membrane plant subgroup domain containing protein	--	--	--	CSPL8_ORYSJ RecName: Full=CASP-like protein 1E1; Short=OsCASPL1E1;	A0A0E0MW90_ORYRU RecName: Full=CASP-like protein {ECO:0000256|RuleBase:RU361233};	At4g15630	GO:0016021,integral component of membrane; GO:0005886,plasma membrane; GO:0051539,4 iron, 4 sulfur cluster binding; GO:0003674,molecular_function; GO:0005488,binding; GO:0051536,iron-sulfur cluster binding; GO:0051540,metal cluster binding; GO:0005575,cellular_component; GO:0016020,membrane; GO:0031224,intrinsic component of membrane; GO:0110165,cellular anatomical entity; GO:0071944,cell periphe…
Os01g0364100	3.065	3.6875	3.37625	1.6797	2.1761	2.2484	1.62755	2.0864	1.1687	2.521	1.2927	0.9754	114	141	127.5	67	126	115	78.5	109	48	152	74	57	-0.707477	0.00153406	0.00903547	false	-0.993417	2.35504e-05	0.000109474	false	-1.03651	0.00190044	0.00748308	down	1	14825133	14828267	+	Os01g0364100	Similar to OSIGBa0145M07.8 protein	K13436 pto-interacting protein 1 [EC:2.7.11.1] | (RefSeq) PTI1-like tyrosine-protein kinase 1 (A)	ko04626: Plant-pathogen interaction	--	WAK5_ARATH RecName: Full=Wall-associated receptor kinase 5; EC=2.7.11.-; Flags: Precursor;	A0A0E0MWA2_ORYRU SubName: Full=Uncharacterized protein {ECO:0000313|EnsemblPlants:ORUFI01G17070.1};	At1g21230	GO:0016021,integral component of membrane; GO:0005886,plasma membrane; GO:0005524,ATP binding; GO:0005509,calcium ion binding; GO:0030247,polysaccharide binding; GO:0106310,protein serine kinase activity; GO:0004674,protein serine/threonine kinase activity; GO:0106311,protein threonine kinase activity; GO:0007166,cell surface receptor signaling pathway; GO:0006468,protein phosphorylation; GO:0000…
Os01g0365000	1.2684	1.3983	1.33335	0.9265	1.3036	0.8148	0.60325	0.8428	0.3637	1.3693	1.0164	1.1706	60	68	64	47	96	53	37.5	56	19	105	74	87	-0.367596	0.221031	0.40495	false	-1.06247	0.000948283	0.00315695	down	-0.116677	0.65925	0.770222	false	1	14903885	14915751	-	Os01g0365000	Protein kinase%2C catalytic domain domain containing protein	K20718 LRR receptor-like serine/threonine-protein kinase ERECTA [EC:2.7.11.1] | (RefSeq) LRR receptor-like serine/threonine-protein kinase ERECTA isoform X1 (A)	ko04016: MAPK signaling pathway - plant	--	WAK5_ARATH RecName: Full=Wall-associated receptor kinase 5; EC=2.7.11.-; Flags: Precursor;	A0A0P0V2L8_ORYSJ SubName: Full=Os01g0365000 protein {ECO:0000313|EMBL:BAS72132.1};	At1g21230	GO:0016021,integral component of membrane; GO:0005886,plasma membrane; GO:0005524,ATP binding; GO:0005509,calcium ion binding; GO:0030247,polysaccharide binding; GO:0106310,protein serine kinase activity; GO:0004674,protein serine/threonine kinase activity; GO:0106311,protein threonine kinase activity; GO:0007166,cell surface receptor signaling pathway; GO:0006468,protein phosphorylation; GO:0000…
Os01g0367400	1.4006	2.2899	1.84525	2.6119	2.431	5.9809	4.15495	3.4794	4.8305	2.3713	2.517	1.9346	47	79	63	94	127	276	171.5	164	179	129	130	102	1.01027	0.0056387	0.0261971	up	1.20361	5.64977e-07	3.40688e-06	up	0.352524	0.200802	0.329603	false	1	15019814	15023931	-	Os01g0367400	Conserved hypothetical protein	--	--	--	--	A0A0P0V2H1_ORYSJ SubName: Full=Os01g0367400 protein {ECO:0000313|EMBL:BAS72147.1};	At2g39070	--
Os01g0369700	76.4005	102.278	89.3394	25.2956	22.9991	47.7892	25.1797	25.0299	25.3295	28.1575	19.9402	19.863	1180	1624	1402	419	553	1015	487.5	543	432	705	474	482	-1.46242	2.55712e-10	6.92051e-09	down	-1.7846	2.66776e-49	1.89963e-47	down	-1.92873	2.25519e-32	2.71983e-30	down	1	15170441	15171859	-	OsGSTF5	Similar to Glutathione S-transferase GST 8 (EC 2.5.1.18)	K00799 glutathione S-transferase [EC:2.5.1.18] | (RefSeq) glutathione S-transferase 4 (A)	ko00480: Glutathione metabolism; ko01100: Metabolic pathways	--	GSTF4_MAIZE RecName: Full=Glutathione S-transferase 4; EC=2.5.1.18; AltName: Full=GST class-phi member 4; AltName: Full=GST-27; AltName: Full=GST-IV;	Q5ZC86_ORYSJ RecName: Full=Glutathione transferase {ECO:0000256|ARBA:ARBA00012452}; EC=2.5.1.18 {ECO:0000256|ARBA:ARBA00012452};	At3g62760	GO:0005737,cytoplasm; GO:0032991,protein-containing complex; GO:0043295,glutathione binding; GO:0004364,glutathione transferase activity; GO:0042803,protein homodimerization activity; GO:0006749,glutathione metabolic process; GO:0009635,response to herbicide; GO:0009410,response to xenobiotic stimulus; GO:0003674,molecular_function; GO:0005488,binding; GO:0033218,amide binding; GO:0042277,peptide…
Os01g0373700	6.6817	11.0401	8.8609	0.3414	0.1764	0.8653	0.6514	0.391	0.9118	1.0163	0.8921	0.4078	73	124	98.5	4	3	13	8.5	6	11	18	15	7	-4.25013	1.44741e-18	9.66992e-17	down	-3.80488	4.75786e-21	1.02447e-19	down	-3.46757	3.54166e-18	1.61844e-16	down	1	15400221	15400863	-	Os01g0373700	Conserved hypothetical protein	--	--	--	--	Q0JMP5_ORYSJ SubName: Full=Os01g0373700 protein {ECO:0000313|EMBL:BAF04983.1};	--	--
Os01g0373800	7.5267	10.2701	8.8984	0.1949	1.8802	1.5964	0.70345	0.7442	0.6627	0.6449	1.5622	0.5323	72	101	86.5	2	28	21	8.5	10	7	10	23	8	-2.80048	2.32278e-09	5.49733e-08	down	-3.63841	5.80211e-21	1.24361e-19	down	-3.23479	1.94959e-14	5.92396e-13	down	1	15403221	15403783	-	Os01g0373800	Non-protein coding transcript	--	--	--	--	Q5ZCV5_ORYSJ SubName: Full=Os01g0373800 protein {ECO:0000313|EMBL:BAF04984.1};	--	--
Os01g0374600	36.0616	38.7553	37.4085	0.3659	2.4974	2.8532	0.37515	0.6857	0.0646	0.066	0.2086	0.227	1011	1117	1064	11	109	110	14.5	27	2	3	9	10	-4.27963	9.32741e-09	1.97915e-07	down	-6.5615	5.85097e-22	1.32692e-20	down	-7.76275	2.11999e-122	1.24003e-118	down	1	15445662	15447633	+	OsLAC1	Similar to Laccase-21	K05909 laccase [EC:1.10.3.2] | (RefSeq) putative laccase-1 (A)	--	--	LAC1_ORYSJ RecName: Full=Putative laccase-1; EC=1.10.3.2; AltName: Full=Benzenediol:oxygen oxidoreductase 1; AltName: Full=Diphenol oxidase 1; AltName: Full=Urishiol oxidase 1; Flags: Precursor;	A0A0P0V333_ORYSJ RecName: Full=Laccase {ECO:0000256|ARBA:ARBA00012297}; EC=1.10.3.2 {ECO:0000256|ARBA:ARBA00012297}; Flags: Fragment;	At5g09360	GO:0048046,apoplast; GO:0005507,copper ion binding; GO:0052716,hydroquinone:oxygen oxidoreductase activity; GO:0016491,oxidoreductase activity; GO:0046274,lignin catabolic process; GO:0003674,molecular_function; GO:0005488,binding; GO:0043167,ion binding; GO:0043169,cation binding; GO:0046872,metal ion binding; GO:0046914,transition metal ion binding; GO:0003824,catalytic activity; GO:0016679,oxi…
Os01g0376600	2.3632	3.1744	2.7688	2.7281	0.506	0.4092	1.87085	0.4807	3.261	0.6248	0.2193	0.5014	21	29	25	26	7	5	19	6	32	9	3	7	-1.19476	0.0883064	0.215156	false	-0.573834	0.319482	0.441335	false	-2.56895	2.07161e-05	0.000140004	down	1	15562767	15563289	+	Os01g0376600	Hypothetical conserved gene	--	--	--	--	A0A0P0V2N3_ORYSJ SubName: Full=Os01g0376600 protein {ECO:0000313|EMBL:BAS72208.1};	--	--
Os01g0382000	3.8616	2.1564	3.009	0.2	2.159	3.7442	0.4118	0.3055	0.5181	3.9261	0.3717	1.1379	54	31	42.5	3	47	72	7	6	8	89	8	25	-0.537742	0.412812	0.608241	false	-2.8533	4.91718e-09	3.92486e-08	down	-0.685612	0.305662	0.449023	false	1	15934495	15935317	+	OsPR1b	Similar to Pathogenesis-related protein PRB1-2 precursor	K13449 pathogenesis-related protein 1 | (RefSeq) pathogenesis-related protein 1 (A)	ko04016: MAPK signaling pathway - plant; ko04075: Plant hormone signal transduction; ko04626: Plant-pathogen interaction	--	PR1_HORVU RecName: Full=Pathogenesis-related protein 1; Flags: Precursor;	Q7F1Q9_ORYSJ SubName: Full=Os01g0382000 protein {ECO:0000313|EMBL:BAF05003.1}; SubName: Full=Putative pathogenesis-related protein 1 {ECO:0000313|EMBL:BAB84468.1};	At2g14610	GO:0005576,extracellular region; GO:0006952,defense response; GO:0009607,response to biotic stimulus; GO:0006950,response to stress; GO:0008150,biological_process; GO:0050896,response to stimulus; GO:0005575,cellular_component; GO:0110165,cellular anatomical entity
Os01g0383700	47.6143	67.335	57.4746	24.369	35.3456	40.9211	27.3918	29.3038	25.4798	31.9482	29.9096	33.8409	3283	4773	4028	1802	3794	3880	2389	2838	1940	3571	3174	3666	-0.759277	1.66458e-05	0.00018129	false	-1.02324	2.85492e-17	4.89263e-16	down	-0.7946	2.16395e-09	3.24342e-08	false	1	16046692	16056268	+	OsWD40-14	Similar to LEC14B protein	K11801 DDB1- and CUL4-associated factor 11 | (RefSeq) LEC14B protein isoform X1 (A)	--	--	LE14B_LITER RecName: Full=LEC14B protein;	A0A0E0MWL8_ORYRU RecName: Full=WD_REPEATS_REGION domain-containing protein {ECO:0000259|PROSITE:PS50294};	At4g03020	--
Os01g0384800	22.9798	22.3527	22.6663	16.1879	17.3524	17.2346	14.2364	11.642	16.8308	10.5316	11.6545	8.0237	319	319	319	241	375	329	242.5	227	258	237	249	175	-0.399847	0.0034279	0.0176707	false	-0.641743	9.6534e-05	0.000400199	false	-1.11934	1.16425e-10	2.12812e-09	down	1	16130515	16131331	+	Os01g0384800	Conserved hypothetical protein	--	--	--	--	Q0JML6_ORYSJ SubName: Full=Os01g0384800 protein {ECO:0000313|EMBL:BAF05012.1};	At3g21570	--
Os01g0389700	8.3073	6.7131	7.5102	3.0388	4.5563	4.7399	1.54645	1.8198	1.2731	3.3506	2.9479	2.8471	130	108	119	51	111	102	31	40	22	85	71	70	-0.840947	0.00078034	0.00508548	false	-2.21844	1.24953e-17	2.17966e-16	down	-1.24759	9.9268e-08	1.09298e-06	down	1	16435858	16436778	+	Os01g0389700	Protein of unknown function DUF679 family protein	--	--	--	DMP10_ARATH RecName: Full=Protein DMP10 {ECO:0000303|PubMed:20712629}; Short=AtDMP10 {ECO:0000303|PubMed:20712629};	Q0JMK6_ORYSJ SubName: Full=Os01g0389700 protein {ECO:0000313|EMBL:BAF05022.1};	At5g27370	GO:0016021,integral component of membrane; GO:0016301,kinase activity; GO:0010256,endomembrane system organization; GO:0003674,molecular_function; GO:0003824,catalytic activity; GO:0016740,transferase activity; GO:0016772,transferase activity, transferring phosphorus-containing groups; GO:0008150,biological_process; GO:0009987,cellular process; GO:0016043,cellular component organization; GO:00718…
Os01g0495701	2.3065	3.9262	3.11635	0.1434	0.4692	0.2795	0.1281	0.0821	0.1741	0.1423	0.1998	0.0245	60	105	82.5	4	19	10	4	3	5	6	8	1	-3.32095	4.50671e-14	2.00343e-12	down	-4.6155	2.52263e-19	4.90844e-18	down	-4.62267	2.02666e-18	9.52162e-17	down	1	16980463	16981993	-	Os01g0495701	Hypothetical conserved gene	--	--	--	--	A0A0P0V2W9_ORYSJ SubName: Full=Os01g0495701 protein {ECO:0000313|EMBL:BAS72298.1}; Flags: Fragment;	--	--
Os01g0498300	1.73	1.9368	1.8334	0.3957	0.3984	0.2136	0.31365	0.3021	0.3252	0.5437	0.4666	0.4779	53	61	57	13	19	9	12	13	11	27	22	23	-2.43304	2.40198e-09	5.66755e-08	down	-2.51097	1.12111e-11	1.19983e-10	down	-1.83269	8.85974e-08	9.85693e-07	down	1	17159733	17161535	-	Os01g0498300	Glycosyltransferase AER61%2C uncharacterized domain containing protein	--	--	--	MUC21_ARATH RecName: Full=Xylan glycosyltransferase MUCI21 {ECO:0000305}; EC=2.4.-.- {ECO:0000305|PubMed:26482889}; AltName: Full=Protein MUCILAGE-MODIFIED 5 {ECO:0000303|PubMed:11706181}; AltName: Full=Protein MUCILAGE-RELATED 21 {ECO:0000303|PubMed:26482889}; AltName: Full=Putative xylan xylosyltransgerase MUCI21 {ECO:0000303|PubMed:26979331};	A0A0D9Y951_9ORYZ SubName: Full=Uncharacterized protein {ECO:0000313|EnsemblPlants:OGLUM01G19550.1};	At2g41640	GO:0005794,Golgi apparatus; GO:0000139,Golgi membrane; GO:0016021,integral component of membrane; GO:0047517,1,4-beta-D-xylan synthase activity; GO:0016757,transferase activity, transferring glycosyl groups; GO:0071555,cell wall organization; GO:0010192,mucilage biosynthetic process; GO:0048354,mucilage biosynthetic process involved in seed coat development; GO:0003674,molecular_function; GO:0003…
Os01g0502700	6.7641	4.7348	5.74945	1.8862	4.751	5.6084	2.70575	2.8354	2.5761	3.2757	3.7788	2.736	107	77	92	32	117	122	54	63	45	84	92	68	-0.469021	0.194383	0.371307	false	-1.04037	2.97555e-05	0.00013583	down	-0.764884	0.00447105	0.0154542	false	1	17420279	17421266	+	Os01g0502700	Similar to Histone H2A	K11251 histone H2A | (RefSeq) probable histone H2A.5 (A)	--	--	H2A5_ORYSI RecName: Full=Probable histone H2A.5;	A0A0P0V312_ORYSJ RecName: Full=Histone H2A {ECO:0000256|RuleBase:RU003767};	At5g02560	GO:0000786,nucleosome; GO:0005634,nucleus; GO:0003677,DNA binding; GO:0046982,protein heterodimerization activity; GO:0003674,molecular_function; GO:0003676,nucleic acid binding; GO:0005488,binding; GO:0097159,organic cyclic compound binding; GO:1901363,heterocyclic compound binding; GO:0005515,protein binding; GO:0046983,protein dimerization activity; GO:0000785,chromatin; GO:0005575,cellular_co…
Os01g0503400	10.5286	10.2919	10.4102	12.6693	11.6549	17.764	19.6576	20.4061	18.909	19.2019	17.0683	25.8183	1012	1017	1014.5	1306	1744	2348	2381	2755	2007	2992	2525	3899	0.449922	0.00340063	0.0175495	false	0.961977	2.74298e-35	1.17908e-33	false	1.04889	8.14435e-11	1.52654e-09	up	1	17454023	17464973	-	OsNRAMP6	Similar to (Rice Genome Annotation Project) metal transporter Nramp6	K21398 natural resistance-associated macrophage protein 2 | (RefSeq) metal transporter Nramp4 (A)	--	--	NRAM4_ORYSJ RecName: Full=Metal transporter Nramp4;	A0A0D9Y982_9ORYZ SubName: Full=Uncharacterized protein {ECO:0000313|EnsemblPlants:OGLUM01G19810.2};	At1g80830	GO:0016021,integral component of membrane; GO:0015086,cadmium ion transmembrane transporter activity; GO:0005384,manganese ion transmembrane transporter activity; GO:0055072,iron ion homeostasis; GO:0003674,molecular_function; GO:0005215,transporter activity; GO:0008324,cation transmembrane transporter activity; GO:0015075,ion transmembrane transporter activity; GO:0015318,inorganic molecular ent…
Os01g0508000	4.7546	5.0936	4.9241	12.3115	9.9878	8.8307	9.2072	8.6684	9.746	6.3613	10.708	12.0639	148	163	155.5	411	484	378	357	379	335	321	513	590	1.09343	2.03203e-09	4.82877e-08	up	0.939516	7.61324e-11	7.48135e-10	false	1.0376	2.84932e-05	0.000186061	up	1	17756115	17764819	+	Os1bglu1	Similar to Beta-glucosidase	K05350 beta-glucosidase [EC:3.2.1.21] | (RefSeq) beta-glucosidase 1 (A)	ko00460: Cyanoamino acid metabolism; ko00500: Starch and sucrose metabolism; ko00999: Biosynthesis of various plant secondary metabolites; ko01100: Metabolic pathways; ko01110: Biosynthesis of secondary metabolites	--	BGL01_ORYSJ RecName: Full=Beta-glucosidase 1; Short=Os1bglu1; EC=3.2.1.21; Flags: Precursor;	A0A0E0MX21_ORYRU SubName: Full=Uncharacterized protein {ECO:0000313|EnsemblPlants:ORUFI01G19230.1};	At3g18080	GO:0008422,beta-glucosidase activity; GO:0102483,scopolin beta-glucosidase activity; GO:0005975,carbohydrate metabolic process; GO:0003674,molecular_function; GO:0003824,catalytic activity; GO:0004553,hydrolase activity, hydrolyzing O-glycosyl compounds; GO:0015926,glucosidase activity; GO:0016787,hydrolase activity; GO:0016798,hydrolase activity, acting on glycosyl bonds; GO:0008150,biological_p…
Os01g0508100	5.4628	6.2161	5.83945	20.1827	29.1317	19.9376	18.9602	18.7857	19.1348	12.5892	15.8719	19.6153	53	62	57.5	210	440	266	230.5	256	205	198	237	299	2.00104	1.96327e-17	1.20808e-15	up	1.7349	4.30904e-20	8.75524e-19	up	1.50971	4.28965e-09	6.05702e-08	up	1	17767883	17768453	+	RH3	Ferritin/ribonucleotide reductase-like family protein	--	--	--	NRH3_ORYSJ RecName: Full=NRR repressor homolog 3 {ECO:0000305};	A0A0E0MX22_ORYRU SubName: Full=Uncharacterized protein {ECO:0000313|EnsemblPlants:ORUFI01G19240.1};	--	GO:0005634,nucleus; GO:0006952,defense response; GO:0010112,regulation of systemic acquired resistance; GO:0006950,response to stress; GO:0008150,biological_process; GO:0050896,response to stimulus; GO:0002831,regulation of response to biotic stimulus; GO:0009605,response to external stimulus; GO:0009607,response to biotic stimulus; GO:0009627,systemic acquired resistance; GO:0031347,regulation o…
Os01g0508500	18.3969	18.5146	18.4557	59.5559	100.984	88.6663	67.0498	54.2614	79.8381	42.2005	63.6985	104.521	231	239	235	802	1974	1531	1032	957	1107	859	1231	2062	2.18947	2.79679e-33	5.36043e-31	up	1.89499	1.42265e-32	5.50882e-31	up	1.98942	4.52815e-13	1.15661e-11	up	1	17798266	17799004	+	RH2	Conserved hypothetical protein	--	--	--	NRH2_ORYSJ RecName: Full=NRR repressor homolog 2 {ECO:0000305};	A0A0E0I904_ORYNI SubName: Full=Uncharacterized protein {ECO:0000313|EnsemblPlants:ONIVA08G07920.1};	--	GO:0005634,nucleus; GO:0006952,defense response; GO:0010112,regulation of systemic acquired resistance; GO:0006950,response to stress; GO:0008150,biological_process; GO:0050896,response to stimulus; GO:0002831,regulation of response to biotic stimulus; GO:0009605,response to external stimulus; GO:0009607,response to biotic stimulus; GO:0009627,systemic acquired resistance; GO:0031347,regulation o…
Os01g0510200	67.5806	106.574	87.0773	3.0739	6.9756	17.2745	4.985	7.2481	2.7219	4.3662	3.7799	4.8136	697	1130	913.5	34	112	245	68	105	31	73	60	78	-3.24433	2.25522e-06	3.02893e-05	down	-4.05883	5.64561e-25	1.48273e-23	down	-4.27843	4.78206e-97	8.6066e-94	down	1	17911538	17912144	-	Os01g0510200	Conserved hypothetical protein	--	--	--	--	A2ZTN7_ORYSJ SubName: Full=Os01g0510200 protein {ECO:0000313|EMBL:BAF05079.1};	--	--
Os01g0511000	5.4903	6.7565	6.1234	1.6677	0.7748	1.7543	3.0286	1.6879	4.3693	2.4375	2.7565	2.965	132	167	149.5	43	29	58	86.5	57	116	95	102	112	-2.12588	4.90158e-12	1.68055e-10	down	-1.00532	0.000730002	0.00250869	down	-1.11815	1.77677e-07	1.85254e-06	down	1	17975866	17977327	-	Os01g0511000	Similar to LOB domain protein 40	K13945 LOB domain-containing protein 29 | (RefSeq) LOB domain-containing protein 29 (A)	--	--	LBD40_ARATH RecName: Full=LOB domain-containing protein 40; AltName: Full=ASYMMETRIC LEAVES 2-like protein 37; Short=AS2-like protein 37;	A0A0P0V365_ORYSJ SubName: Full=Os01g0511000 protein {ECO:0000313|EMBL:BAF05083.1};	At1g67100	GO:0010468,regulation of gene expression; GO:0009739,response to gibberellin; GO:0008150,biological_process; GO:0008152,metabolic process; GO:0010467,gene expression; GO:0019222,regulation of metabolic process; GO:0043170,macromolecule metabolic process; GO:0050789,regulation of biological process; GO:0060255,regulation of macromolecule metabolic process; GO:0065007,biological regulation; GO:0071…
Os01g0515300	4.7528	5.391	5.0719	2.2985	2.5769	2.9993	1.59925	1.9729	1.2256	2.9318	2.2297	1.9483	295	344	319.5	153	249	256	128	172	84	295	213	190	-0.928919	8.51304e-09	1.81624e-07	false	-1.60487	7.24267e-20	1.44897e-18	down	-1.04777	6.42808e-09	8.77467e-08	down	1	18229321	18233091	+	Os01g0515300	Similar to Leucine Rich Repeat family protein	K20718 LRR receptor-like serine/threonine-protein kinase ERECTA [EC:2.7.11.1] | (RefSeq) LRR receptor-like serine/threonine-protein kinase ERECTA isoform X1 (A)	ko04016: MAPK signaling pathway - plant	--	MIK2_ARATH RecName: Full=MDIS1-interacting receptor like kinase 2 {ECO:0000303|PubMed:26863186}; Short=AtMIK2 {ECO:0000303|PubMed:26863186}; AltName: Full=Probable LRR receptor-like serine/threonine-protein kinase At4g08850; EC=2.7.11.1 {ECO:0000305}; Flags: Precursor;	A0A0D3EPJ1_9ORYZ RecName: Full=Protein kinase domain-containing protein {ECO:0000259|PROSITE:PS50011};	At4g08850	GO:0016021,integral component of membrane; GO:0005886,plasma membrane; GO:0009506,plasmodesma; GO:0090406,pollen tube; GO:0005524,ATP binding; GO:0106310,protein serine kinase activity; GO:0106311,protein threonine kinase activity; GO:0009755,hormone-mediated signaling pathway; GO:0010183,pollen tube guidance; GO:0000166,nucleotide binding; GO:0003674,molecular_function; GO:0005488,binding; GO:00…
Os01g0518300	2.4022	1.6551	2.02865	0.56	0.9001	1.2374	0.8905	0.7839	0.9971	1.4818	1.4307	0.0637	24	17	20.5	6	14	17	11	11	11	24	22	1	-1.12802	0.0429436	0.126915	false	-1.14561	0.0204261	0.0464441	down	-0.980016	0.215195	0.346336	false	1	18386243	18386927	-	Os01g0518300	Conserved hypothetical protein	--	--	--	--	A0A0P0V3B5_ORYSJ SubName: Full=Os01g0518300 protein {ECO:0000313|EMBL:BAS72428.1};	--	GO:0003700,DNA-binding transcription factor activity; GO:0009960,endosperm development; GO:0003674,molecular_function; GO:0140110,transcription regulator activity; GO:0000003,reproduction; GO:0003006,developmental process involved in reproduction; GO:0007275,multicellular organism development; GO:0008150,biological_process; GO:0009791,post-embryonic development; GO:0009888,tissue development; GO:…
Os01g0518400	0.8397	1.2732	1.05645	0.7369	0.7298	0.7723	0.41075	0.5978	0.2237	0.6399	0.7061	0.5659	34	53	43.5	32	46	43	22	34	10	42	44	36	-0.488339	0.156742	0.322199	false	-1.2876	0.00134566	0.0043232	down	-0.683179	0.050422	0.11394	false	1	18390223	18394126	+	Os01g0518400	Similar to Transposon protein	--	--	--	RSLE4_ORYSJ RecName: Full=Zinc finger BED domain-containing protein RICESLEEPER 4; AltName: Full=Transposase-like protein RICESLEEPER 4;	I1NNM2_ORYGL RecName: Full=BED-type domain-containing protein {ECO:0000259|PROSITE:PS50808};	At3g42170	GO:0005634,nucleus; GO:0003677,DNA binding; GO:0046872,metal ion binding; GO:0046983,protein dimerization activity; GO:0009791,post-embryonic development; GO:0003674,molecular_function; GO:0003676,nucleic acid binding; GO:0005488,binding; GO:0097159,organic cyclic compound binding; GO:1901363,heterocyclic compound binding; GO:0043167,ion binding; GO:0043169,cation binding; GO:0005515,protein bind…
Os01g0522400	2.937	4.0495	3.49325	0.0266	0.0183	0.0622	0.01015	0.0203	0	0.1231	0.0556	0.1452	103	146	124.5	1	1	3	0.5	1	0	7	3	8	-6.59576	5.36894e-21	4.227e-19	down	-8.69348	4.8427e-13	5.86305e-12	down	-4.95506	6.97867e-30	7.35495e-28	down	1	18639233	18641762	+	Os01g0522400	Armadillo-like helical domain containing protein	--	--	--	--	A0A0P0V3F3_ORYSJ SubName: Full=Os01g0522400 protein {ECO:0000313|EMBL:BAS72459.1};	At5g18980	GO:0016021,integral component of membrane; GO:0005575,cellular_component; GO:0016020,membrane; GO:0031224,intrinsic component of membrane; GO:0110165,cellular anatomical entity
Os01g0532100	1.011	0.6258	0.8184	2.6853	1.5941	2.0497	2.5074	1.6577	3.3571	2.1356	2.8466	2.379	33	21	27	94	81	92	98.5	76	121	113	143	122	1.38424	0.00010652	0.000924561	up	1.63756	2.57805e-06	1.39806e-05	up	1.63971	3.08207e-07	3.05815e-06	up	1	19173908	19176093	+	Os01g0532100	Tetratricopeptide TPR2 domain containing protein	--	--	--	--	A0A0P0V3K2_ORYSJ SubName: Full=Os01g0532100 protein {ECO:0000313|EMBL:BAF05159.1};	--	--
Os01g0532300	5.1178	4.9781	5.04795	10.8495	7.5362	5.2664	10.1524	8.937	11.3678	6.0161	9.2855	7.7439	106	106	106	241	243	150	260	260	260	202	296	252	0.663539	0.014923	0.0561998	false	1.04273	3.59332e-09	2.90278e-08	up	0.660864	0.00353044	0.0126748	false	1	19200090	19201308	-	Os01g0532300	Conserved hypothetical protein	--	--	--	--	B7F9Z0_ORYSJ SubName: Full=Os01g0532300 protein {ECO:0000313|EMBL:BAS72518.1}; SubName: Full=cDNA, clone: J100019F21, full insert sequence {ECO:0000313|EMBL:BAH01438.1};	--	GO:0016021,integral component of membrane; GO:0005575,cellular_component; GO:0016020,membrane; GO:0031224,intrinsic component of membrane; GO:0110165,cellular anatomical entity
Os01g0533000	12.0494	10.8077	11.4285	21.2848	17.3857	19.66	22.5428	18.9028	26.1827	21.066	23.6441	22.3523	398	367	382.5	754	894	893	916	877	955	1128	1202	1160	0.787254	4.46805e-09	1.01139e-07	false	1.01557	3.54274e-12	3.9768e-11	up	1.02277	2.16261e-17	8.97665e-16	up	1	19258575	19266655	-	OsGSL9	Similar to predicted protein	K11000 callose synthase [EC:2.4.1.-] | (RefSeq) callose synthase 7 isoform X1 (A)	--	--	CALS7_ARATH RecName: Full=Callose synthase 7; EC=2.4.1.34; AltName: Full=1,3-beta-glucan synthase; AltName: Full=Protein GLUCAN SYNTHASE-LIKE 7;	A0A0D3EPT8_9ORYZ RecName: Full=1,3-beta-glucan synthase {ECO:0000256|ARBA:ARBA00019719}; EC=2.4.1.34 {ECO:0000256|ARBA:ARBA00012589};	At1g06490	GO:0000148,1,3-beta-D-glucan synthase complex; GO:0016021,integral component of membrane; GO:0005886,plasma membrane; GO:0003843,1,3-beta-D-glucan synthase activity; GO:0046527,glucosyltransferase activity; GO:0006075,(1->3)-beta-D-glucan biosynthetic process; GO:0080165,callose deposition in phloem sieve plate; GO:0071555,cell wall organization; GO:0010233,phloem transport; GO:0008360,regulation…
Os01g0536400	1.1722	1.0223	1.09725	3.7691	2.3109	2.8219	4.1439	3.3095	4.9783	3.3163	4.0446	3.5761	29	26	27.5	100	89	96	125.5	115	136	133	154	139	1.44289	1.65213e-05	0.000180101	up	1.94064	9.13359e-12	9.91073e-11	up	1.77806	6.54747e-10	1.06162e-08	up	1	19505311	19508410	-	Os01g0536400	Isopenicillin N synthase family protein	K24028 salicylic acid 3-hydroxylase [EC:1.14.11.-] | (RefSeq) naringenin,2-oxoglutarate 3-dioxygenase (A)	--	--	ACCH1_ARATH RecName: Full=1-aminocyclopropane-1-carboxylate oxidase homolog 1;	A0A0P0V3M4_ORYSJ SubName: Full=Os01g0536400 protein {ECO:0000313|EMBL:BAF05174.1}; SubName: Full=Putative 2-oxoglutarate-dependent oxygenase {ECO:0000313|EMBL:BAC19916.1};	At1g03400	GO:0046872,metal ion binding; GO:0016491,oxidoreductase activity; GO:0003674,molecular_function; GO:0005488,binding; GO:0043167,ion binding; GO:0043169,cation binding; GO:0003824,catalytic activity
Os01g0537250	13.5399	23.0723	18.3061	11.4271	13.1096	7.4745	4.1521	5.1717	3.1325	6.7367	6.5499	5.1896	274	480	377	248	413	208	108.5	147	70	221	204	165	-0.75737	0.00175911	0.0101539	false	-2.08317	1.05946e-20	2.22801e-19	down	-1.52007	1.49793e-12	3.56532e-11	down	1	19549155	19550345	-	Os01g0537250	Protein of unknown function DUF3778 domain containing protein	--	--	--	--	A0A0E0FMS1_ORYNI RecName: Full=DUF3778 domain-containing protein {ECO:0000259|Pfam:PF12620};	--	GO:0016021,integral component of membrane; GO:0005575,cellular_component; GO:0016020,membrane; GO:0031224,intrinsic component of membrane; GO:0110165,cellular anatomical entity
Os01g0544450	1.8843	1.5071	1.6957	0.1562	0.4976	0.8678	0.2743	0.2832	0.2654	0.2196	0.0408	0.3465	90	74	82	8	37	57	16.5	19	14	17	3	26	-1.71032	0.000145203	0.00121629	down	-2.59689	5.95109e-16	9.1842e-15	down	-3.00604	3.64471e-09	5.21242e-08	down	1	20192025	20196937	+	OsMCM4	Similar to DNA replication licensing factor mcm4	K02212 DNA replication licensing factor MCM4 [EC:5.6.2.3] | (RefSeq) DNA replication licensing factor MCM4 (A)	ko03030: DNA replication	--	MCM4_ORYSJ RecName: Full=DNA replication licensing factor MCM4; EC=3.6.4.12; AltName: Full=Minichromosome maintenance protein 4; Short=OsMCM4;	B9EXF2_ORYSJ RecName: Full=DNA helicase {ECO:0000256|ARBA:ARBA00012551}; EC=3.6.4.12 {ECO:0000256|ARBA:ARBA00012551};	At2g16440	GO:0005829,cytosol; GO:0042555,MCM complex; GO:0005634,nucleus; GO:0000347,THO complex; GO:0005524,ATP binding; GO:0003678,DNA helicase activity; GO:0003688,DNA replication origin binding; GO:0016787,hydrolase activity; GO:0046872,metal ion binding; GO:0003697,single-stranded DNA binding; GO:0006271,DNA strand elongation involved in DNA replication; GO:0006268,DNA unwinding involved in DNA replic…
Os01g0546400	25.9098	16.0468	20.9783	36.0308	23.1031	27.7757	47.2317	39.82	54.6434	37.0692	51.7267	49.6936	523	333	428	780	726	771	1173.5	1129	1218	1213	1607	1576	0.487907	0.0199755	0.0707064	false	1.20717	2.49418e-11	2.58316e-10	up	1.19406	2.81943e-09	4.13064e-08	up	1	20299783	20302467	-	FCO6	Protein of unknown function DUF6%2C transmembrane domain containing protein	--	--	--	WTR45_ARATH RecName: Full=WAT1-related protein At5g64700;	A0A0P0V409_ORYSJ RecName: Full=WAT1-related protein {ECO:0000256|RuleBase:RU363077};	At5g64700	GO:0016021,integral component of membrane; GO:0005886,plasma membrane; GO:0022857,transmembrane transporter activity; GO:0003674,molecular_function; GO:0005215,transporter activity; GO:0005575,cellular_component; GO:0016020,membrane; GO:0031224,intrinsic component of membrane; GO:0110165,cellular anatomical entity; GO:0071944,cell periphery
Os01g0547600	37.1501	34.7763	35.9632	32.343	35.7737	52.0214	44.7281	42.7304	46.7257	65.8751	92.1821	75.5756	1116	1074	1095	1042	1673	2149	1676.5	1803	1550	3208	4262	3567	0.173909	0.287194	0.481533	false	0.354839	9.92831e-05	0.000410357	false	1.16945	3.72564e-17	1.51335e-15	up	1	20385993	20388511	-	NRT2.4	High-affinity nitrate transporter%2C Nitrate transport%2C Auxin signalin	K02575 MFS transporter, NNP family, nitrate/nitrite transporter | (RefSeq) probable high-affinity nitrate transporter 2.4 (A)	ko00910: Nitrogen metabolism	--	NRT24_ORYSJ RecName: Full=Probable high-affinity nitrate transporter 2.4; Short=OsNRT2.4;	I1NNW6_ORYGL SubName: Full=Uncharacterized protein {ECO:0000313|EnsemblPlants:ORGLA01G0155600.1};	At5g14570	GO:0016021,integral component of membrane; GO:0009705,plant-type vacuole membrane; GO:0005886,plasma membrane; GO:0015112,nitrate transmembrane transporter activity; GO:0071249,cellular response to nitrate; GO:0042128,nitrate assimilation; GO:0015706,nitrate transport; GO:0003674,molecular_function; GO:0005215,transporter activity; GO:0008509,anion transmembrane transporter activity; GO:0015075,i…
Os01g0548750	1.4151	2.3775	1.8963	0.7197	0.6611	1.4968	0.50575	0.7785	0.233	0.7539	0.8776	0.4094	22	38	30	12	16	32	10.5	17	4	19	21	10	-0.963747	0.0525807	0.147616	false	-1.83624	0.00028407	0.00106752	down	-1.43028	0.00376614	0.0133753	down	1	20468335	20469249	-	Os01g0548750	Gnk2-homologous domain domain containing protein	--	--	--	CRK2_ARATH RecName: Full=Cysteine-rich receptor-like protein kinase 2; Short=Cysteine-rich RLK2; EC=2.7.11.-; Flags: Precursor;	A0A0N7KD48_ORYSJ SubName: Full=Os01g0548750 protein {ECO:0000313|EMBL:BAS72617.1};	At1g70520	GO:0016021,integral component of membrane; GO:0005886,plasma membrane; GO:0009506,plasmodesma; GO:0005524,ATP binding; GO:0016301,kinase activity; GO:0106310,protein serine kinase activity; GO:0004674,protein serine/threonine kinase activity; GO:0106311,protein threonine kinase activity; GO:0046777,protein autophosphorylation; GO:0072593,reactive oxygen species metabolic process; GO:0010193,respo…
Os01g0551400	11.1522	9.185	10.1686	6.224	6.8499	5.742	4.42935	3.4773	5.3814	8.0846	7.3518	6.9945	137	116	126.5	82	131	97	66.5	60	73	161	139	135	-0.672737	0.00210336	0.0117578	false	-1.17684	5.44638e-07	3.2927e-06	down	-0.388668	0.0553694	0.122307	false	1	20700553	20702884	+	Os01g0551400	Hypothetical conserved gene	--	--	--	--	A0A0E0FN27_ORYNI SubName: Full=Uncharacterized protein {ECO:0000313|EnsemblPlants:ONIVA01G21900.1};	At4g39300	--
Os01g0556700	7.9186	7.182	7.5503	14.2682	11.2728	6.2252	13.193	12.7226	13.6635	14.3901	20.9971	23.0205	74	69	71.5	143	164	80	154	167	141	218	302	338	0.504945	0.113349	0.25695	false	0.841756	1.96241e-05	9.22605e-05	false	1.42107	1.40833e-08	1.81947e-07	up	1	21040111	21041071	+	OsNRT1.4	Hypothetical conserved gene	--	--	--	PTR27_ARATH RecName: Full=Protein NRT1/ PTR FAMILY 6.2; Short=AtNPF6.2; AltName: Full=Nitrate transporter 1.4;	A0A0N7KD56_ORYSJ SubName: Full=Os01g0556700 protein {ECO:0000313|EMBL:BAS72681.1}; Flags: Fragment;	At2g26690	GO:0016021,integral component of membrane; GO:0015293,symporter activity; GO:0042128,nitrate assimilation; GO:0006857,oligopeptide transport; GO:0009753,response to jasmonic acid; GO:0009611,response to wounding; GO:0003674,molecular_function; GO:0005215,transporter activity; GO:0015291,secondary active transmembrane transporter activity; GO:0022804,active transmembrane transporter activity; GO:0…
Os01g0556800	0.4764	0.6815	0.57895	0.0261	0.054	0.0611	0.01995	0.0399	0	0.0173	0.0728	0.0357	17	25	21	1	3	3	1	2	0	1	4	2	-3.56227	5.44184e-06	6.67351e-05	down	-4.67227	1.97861e-06	1.09452e-05	down	-3.74365	2.28913e-06	1.8912e-05	down	1	21041870	21046818	-	Os01g0556800	Hypothetical conserved gene	--	--	--	DUF3_ARATH RecName: Full=DUF724 domain-containing protein 3 {ECO:0000305}; Short=AtDUF3 {ECO:0000303|PubMed:19795213};	A0A0P0V413_ORYSJ SubName: Full=Os01g0556800 protein {ECO:0000313|EMBL:BAS72682.1};	At1g26540	GO:0005773,vacuole; GO:0042803,protein homodimerization activity; GO:0040008,regulation of growth; GO:0003674,molecular_function; GO:0005488,binding; GO:0005515,protein binding; GO:0042802,identical protein binding; GO:0046983,protein dimerization activity; GO:0008150,biological_process; GO:0040007,growth; GO:0050789,regulation of biological process; GO:0065007,biological regulation; GO:0005575,c…
Os01g0557100	12.1203	18.056	15.0882	2.3926	4.7344	4.3672	2.3085	2.2933	2.3237	5.0854	4.0084	3.0579	222	340	281	47	135	110	53	59	47	151	113	88	-1.94839	2.43331e-14	1.1267e-12	down	-2.66784	6.70432e-37	3.12873e-35	down	-1.84707	1.7884e-15	6.10849e-14	down	1	21056832	21058033	-	Os01g0557100	Alpha/beta hydrolase family protein	--	--	--	MES3_ARATH RecName: Full=Methylesterase 3; Short=AtMES3; EC=3.1.1.-;	A0A0E0MY02_ORYRU RecName: Full=AB hydrolase-1 domain-containing protein {ECO:0000259|Pfam:PF12697};	At2g23610	GO:0005773,vacuole; GO:0016788,hydrolase activity, acting on ester bonds; GO:0080030,methyl indole-3-acetate esterase activity; GO:0080032,methyl jasmonate esterase activity; GO:0080031,methyl salicylate esterase activity; GO:0009694,jasmonic acid metabolic process; GO:0009696,salicylic acid metabolic process; GO:0003674,molecular_function; GO:0003824,catalytic activity; GO:0016787,hydrolase acti…
Os01g0558100	22.9985	25.8938	24.4461	6.0788	8.8406	9.8766	5.33495	4.3835	6.2864	12.139	8.3539	7.9529	381	441	411	108	228	225	108.5	102	115	326	213	207	-1.53903	5.93204e-17	3.50275e-15	down	-2.17312	3.02609e-39	1.51803e-37	down	-1.31579	5.02637e-13	1.27551e-11	down	1	21114757	21115731	-	OsGSTU6	Similar to Glutathione S-transferase TSI-1 (EC 2.5.1.18) (Glutathione S- transferase 1)	K00799 glutathione S-transferase [EC:2.5.1.18] | (RefSeq) probable glutathione S-transferase GSTU6 (A)	ko00480: Glutathione metabolism; ko01100: Metabolic pathways	--	GSTU6_ORYSJ RecName: Full=Probable glutathione S-transferase GSTU6; EC=2.5.1.18; AltName: Full=28 kDa cold-induced protein;	Q0JLY2_ORYSJ SubName: Full=Os01g0558100 protein {ECO:0000313|EMBL:BAF05246.1}; SubName: Full=Putative tau class GST protein 4 {ECO:0000313|EMBL:BAB85382.1};	At1g10360	GO:0005737,cytoplasm; GO:0004364,glutathione transferase activity; GO:0006749,glutathione metabolic process; GO:0003674,molecular_function; GO:0003824,catalytic activity; GO:0016740,transferase activity; GO:0016765,transferase activity, transferring alkyl or aryl (other than methyl) groups; GO:0006518,peptide metabolic process; GO:0006575,cellular modified amino acid metabolic process; GO:0006790…
Os01g0558700	3.9177	4.1572	4.03745	2.9058	1.6014	1.2302	1.69375	1.7749	1.6126	3.1856	4.3389	0.9634	44	48	46	35	28	19	24	28	20	58	75	17	-1.07422	0.00909458	0.0381656	down	-1.20676	0.000236595	0.000903016	down	-0.467749	0.337773	0.48213	false	1	21150419	21151079	+	Os01g0558700	Conserved hypothetical protein	--	--	--	--	C7IXF5_ORYSJ SubName: Full=Os01g0558700 protein {ECO:0000313|EMBL:BAH91149.1};	--	--
Os01g0559000	37.7888	31.6492	34.719	15.7575	16.5468	27.181	14.49	14.2873	14.6927	14.8225	14.9261	14.7335	1288	1109	1198.5	576	878	1274	618.5	684	553	819	783	789	-0.789213	3.28924e-05	0.000331468	false	-1.21929	2.23747e-30	7.75401e-29	down	-1.17374	2.55946e-25	2.04381e-23	down	1	21167873	21172622	+	Os01g0559000	Protein of unknown function DUF1000 family protein	--	--	--	--	A0A0P0V427_ORYSJ SubName: Full=Os01g0559000 protein {ECO:0000313|EMBL:BAF05253.1}; SubName: Full=Thioredoxin family Trp26-like protein {ECO:0000313|EMBL:BAD87947.1};	At2g25950	--
Os01g0559750	168.651	120.69	144.671	146.1	151.53	166.914	186.063	190.477	181.648	277.943	248.621	416.106	1748	1286	1517	1624	2445	2379	2426	2773	2079	4670	3966	6776	0.118731	0.377013	0.574075	false	0.406843	0.000969682	0.00322269	false	1.17734	5.51521e-09	7.60396e-08	up	1	21242600	21243209	+	Os01g0559750	Hypothetical gene	--	--	--	--	Q5JKQ1_ORYSJ SubName: Full=Uncharacterized protein B1064G04.35 {ECO:0000313|EMBL:BAD87956.1};	--	--
Os01g0561600	13.8481	18.167	16.0075	0.1133	0.039	0.4858	0.4893	0.6486	0.33	1.5736	0.3749	0.4639	456	615	535.5	4	2	22	21	30	12	84	19	24	-6.21809	1.04376e-12	3.88634e-11	down	-4.94646	7.091e-97	1.44453e-94	down	-4.27335	4.94636e-12	1.11601e-10	down	1	21342129	21344066	-	CYP76M14	Cytochrome P450 family protein	K16084 ent-cassa-12,15-diene 11-hydroxylase / oryzalexin D synthase [EC:1.14.14.112 1.14.14.123] | (RefSeq) ent-cassadiene C11-alpha-hydroxylase 1-like (A)	ko00904: Diterpenoid biosynthesis; ko01110: Biosynthesis of secondary metabolites	--	C76M7_ORYSJ RecName: Full=Ent-cassadiene C11-alpha-hydroxylase 1; EC=1.14.14.112 {ECO:0000269|PubMed:19825834, ECO:0000269|PubMed:21985968, ECO:0000269|PubMed:22215681}; AltName: Full=Cytochrome P450 76M7 {ECO:0000303|PubMed:19825834};	Q8LJD2_ORYSJ SubName: Full=Monooxygenase {ECO:0000313|EMBL:ABS70450.1}; SubName: Full=Os01g0561600 protein {ECO:0000313|EMBL:BAS72723.1}; SubName: Full=cDNA clone:J023025F12, full insert sequence {ECO:0000313|EMBL:BAG91461.1};	At2g45550	GO:0016021,integral component of membrane; GO:0016020,membrane; GO:0036202,ent-cassa-12,15-diene 11-hydroxylase activity; GO:0020037,heme binding; GO:0005506,iron ion binding; GO:0004497,monooxygenase activity; GO:0016709,oxidoreductase activity, acting on paired donors, with incorporation or reduction of molecular oxygen, NAD(P)H as one donor, and incorporation of one atom of oxygen; GO:0006952,…
Os01g0562400	0.434	0.6473	0.54065	0.1349	0.2416	0.5892	0.2237	0.1854	0.262	0.1963	0.0564	0.3867	15	23	19	5	13	28	9.5	9	10	11	3	21	-0.721359	0.249229	0.438538	false	-1.22526	0.0183434	0.0423493	down	-1.28008	0.0673121	0.142732	false	1	21381884	21389642	+	OsFKBP57	Peptidyl-prolyl cis-trans isomerase%2C FKBP-type%2C domain domain containing protein	K09571 FK506-binding protein 4/5 [EC:5.2.1.8] | (RefSeq) 70 kDa peptidyl-prolyl isomerase (A)	--	--	FKB70_WHEAT RecName: Full=70 kDa peptidyl-prolyl isomerase; EC=5.2.1.8; AltName: Full=Peptidyl-prolyl cis-trans isomerase; Short=PPIase; AltName: Full=Rotamase;	A0A0P0V450_ORYSJ RecName: Full=Peptidylprolyl isomerase {ECO:0000256|PROSITE-ProRule:PRU00277}; EC=5.2.1.8 {ECO:0000256|PROSITE-ProRule:PRU00277}; Flags: Fragment;	At5g48570	GO:0005737,cytoplasm; GO:0005516,calmodulin binding; GO:0003755,peptidyl-prolyl cis-trans isomerase activity; GO:0061077,chaperone-mediated protein folding; GO:0000413,protein peptidyl-prolyl isomerization; GO:0003674,molecular_function; GO:0005488,binding; GO:0005515,protein binding; GO:0003824,catalytic activity; GO:0016853,isomerase activity; GO:0016859,cis-trans isomerase activity; GO:0140096…
Os01g0564300	462.913	430.226	446.569	213.643	304.224	374.338	201.523	169.844	233.202	282.861	271.863	257.881	12506	11949	12227.5	6190	12795	13907	6701	6445	6957	12388	11304	10946	-0.569053	0.00044406	0.00316087	false	-1.11156	1.13692e-19	2.24954e-18	down	-0.668648	1.01503e-18	4.92708e-17	false	1	21525509	21549819	+	OsFKBP46	Peptidyl-prolyl cis-trans isomerase%2C FKBP-type domain containing protein	K09571 FK506-binding protein 4/5 [EC:5.2.1.8] | (RefSeq) 70 kDa peptidyl-prolyl isomerase (A)	--	--	FKB65_ARATH RecName: Full=Peptidyl-prolyl cis-trans isomerase FKBP65; Short=PPIase FKBP65; EC=5.2.1.8; AltName: Full=70 kDa peptidyl-prolyl isomerase; AltName: Full=FK506-binding protein 65; Short=AtFKBP65; AltName: Full=Immunophilin FKBP65; AltName: Full=Peptidyl-prolyl isomerase ROF2; AltName: Full=Protein ROTAMASE FKBP 2; AltName: Full=Rotamase;	Q656V1_ORYSJ RecName: Full=Peptidylprolyl isomerase {ECO:0000256|PROSITE-ProRule:PRU00277}; EC=5.2.1.8 {ECO:0000256|PROSITE-ProRule:PRU00277};	At5g48570	GO:0005737,cytoplasm; GO:0005634,nucleus; GO:0009536,plastid; GO:0005773,vacuole; GO:0005516,calmodulin binding; GO:0003755,peptidyl-prolyl cis-trans isomerase activity; GO:0070370,cellular heat acclimation; GO:0061077,chaperone-mediated protein folding; GO:0000413,protein peptidyl-prolyl isomerization; GO:0003674,molecular_function; GO:0005488,binding; GO:0005515,protein binding; GO:0003824,cata…
Os01g0565800	0.5331	0.726	0.62955	2.7836	0.8903	1.163	1.81785	1.8977	1.738	1.1839	1.1084	1.7644	5	7	6	28	13	15	21.5	25	18	18	16	26	NA	NA	NA	NA	1.58488	0.00498542	0.0137696	up	NA	NA	NA	NA	1	21628898	21630661	-	Os01g0565800	Protein of unknown function DUF538 family protein	--	--	--	Y5161_ARATH RecName: Full=Uncharacterized protein At5g01610;	A0A0P0V464_ORYSJ SubName: Full=Os01g0565800 protein {ECO:0000313|EMBL:BAF05272.1};	At5g37070	--
Os01g0570800	19.7811	23.2852	21.5331	7.4994	11.4497	9.5042	7.1785	7.7379	6.6191	8.9003	7.7504	7.8516	728	881	804.5	296	656	481	334.5	400	269	531	439	454	-1.15988	2.69885e-13	1.08806e-11	down	-1.53717	3.15716e-41	1.69251e-39	down	-1.34546	4.293e-29	4.3671e-27	down	1	21900067	21903103	-	Os01g0570800	IQ calmodulin-binding region domain containing protein	--	--	--	IQM1_ARATH RecName: Full=IQ domain-containing protein IQM1 {ECO:0000305}; AltName: Full=IQ motif-containing protein 1 {ECO:0000303|Ref.6};	Q0JLU0_ORYSJ SubName: Full=Os01g0570800 protein {ECO:0000313|EMBL:BAF05288.1}; SubName: Full=Putative calmodulin-binding protein {ECO:0000313|EMBL:BAD45140.1};	At4g33050	GO:0005737,cytoplasm; GO:0005634,nucleus; GO:0005516,calmodulin binding; GO:0010119,regulation of stomatal movement; GO:0003674,molecular_function; GO:0005488,binding; GO:0005515,protein binding; GO:0008150,biological_process; GO:0009987,cellular process; GO:0010118,stomatal movement; GO:0050789,regulation of biological process; GO:0050794,regulation of cellular process; GO:0065007,biological reg…
Os01g0575200	27.1203	33.1982	30.1593	8.5488	9.6317	11.119	6.6508	6.9273	6.3743	10.7456	8.5511	8.0754	917	1154	1035.5	310	507	517	283.5	329	238	589	445	429	-1.60576	1.68823e-32	3.15807e-30	down	-2.13506	5.38305e-76	7.00603e-74	down	-1.67358	2.26727e-33	3.0487e-31	down	1	22138044	22142395	+	OsbHLH024	Helix-loop-helix DNA-binding domain containing protein	--	--	--	BH041_ARATH RecName: Full=Putative transcription factor bHLH041; AltName: Full=Basic helix-loop-helix protein 41; Short=AtbHLH41; Short=bHLH 41; AltName: Full=Transcription factor EN 51; AltName: Full=bHLH transcription factor bHLH041;	Q8S0C6_ORYSJ SubName: Full=Os01g0575200 protein {ECO:0000313|EMBL:BAS72821.1}; SubName: Full=cDNA clone:002-101-F10, full insert sequence {ECO:0000313|EMBL:BAG97684.1};	At5g56960	GO:0005634,nucleus; GO:0003677,DNA binding; GO:0003700,DNA-binding transcription factor activity; GO:0046983,protein dimerization activity; GO:0006355,regulation of transcription, DNA-templated; GO:0010200,response to chitin; GO:0003674,molecular_function; GO:0003676,nucleic acid binding; GO:0005488,binding; GO:0097159,organic cyclic compound binding; GO:1901363,heterocyclic compound binding; GO:…
Os01g0576050	2.2132	1.4352	1.8242	6.4202	2.738	1.7286	3.198	2.6845	3.7115	3.1856	3.4086	3.9129	27	18	22.5	84	52	29	48	46	50	63	64	75	1.02241	0.0481656	0.138174	false	0.852657	0.0172136	0.0401057	false	1.00846	0.00643523	0.0210816	up	1	22233975	22234779	-	Os01g0576050	Hypothetical conserved gene	--	--	--	--	A0A0D9YAT7_9ORYZ SubName: Full=Uncharacterized protein {ECO:0000313|EnsemblPlants:OGLUM01G23960.1};	--	--
Os01g0580500	3.9303	4.1617	4.046	0.6958	3.0359	1.8451	1.35185	0.9917	1.712	2.3938	1.4223	1.6466	79	86	82.5	15	95	51	33	28	38	78	44	52	-1.08655	0.00936694	0.0389589	down	-1.56345	4.91606e-08	3.43889e-07	down	-1.09674	0.000170395	0.000910213	down	1	22489496	22490967	+	ACO7	ACC oxidase%2C Ethylene biosynthesi	K05933 aminocyclopropanecarboxylate oxidase [EC:1.14.17.4] | (RefSeq) 1-aminocyclopropane-1-carboxylate oxidase 1 (A)	ko00270: Cysteine and methionine metabolism; ko01100: Metabolic pathways; ko01110: Biosynthesis of secondary metabolites	--	ACCO1_ARATH RecName: Full=1-aminocyclopropane-1-carboxylate oxidase 1; Short=ACC oxidase 1; Short=AtACO1; EC=1.14.17.4;	A0A0P0V4I5_ORYSJ SubName: Full=Os01g0580500 protein {ECO:0000313|EMBL:BAS72861.1}; Flags: Fragment;	At2g19590	GO:0009815,1-aminocyclopropane-1-carboxylate oxidase activity; GO:0031418,L-ascorbic acid binding; GO:0046872,metal ion binding; GO:0071398,cellular response to fatty acid; GO:0071732,cellular response to nitric oxide; GO:0051365,cellular response to potassium ion starvation; GO:0006952,defense response; GO:0009693,ethylene biosynthetic process; GO:0003674,molecular_function; GO:0003824,catalytic…
Os01g0581400	1.8992	2.4767	2.18795	0.72	0.992	1.0624	0.9683	1.2184	0.7182	1.3775	1.3696	0.9697	91	122	106.5	37	74	70	60	82	38	107	101	73	-1.21276	4.89162e-06	6.04869e-05	down	-1.11031	9.29627e-06	4.60333e-05	down	-0.767595	0.00208062	0.0080757	false	1	22538998	22542226	+	OsRLCK39	Serine/threonine protein kinase-related domain containing protein	K13430 serine/threonine-protein kinase PBS1 [EC:2.7.11.1] | (RefSeq) serine/threonine-protein kinase CDL1 isoform X1 (A)	ko04626: Plant-pathogen interaction	--	PUB34_ARATH RecName: Full=U-box domain-containing protein 34; AltName: Full=Plant U-box protein 34; Includes: RecName: Full=E3 ubiquitin ligase; EC=2.3.2.27; AltName: Full=RING-type E3 ubiquitin transferase {ECO:0000305}; Includes: RecName: Full=Serine/threonine-protein kinase; EC=2.7.11.-;	A0A0P0V4I8_ORYSJ SubName: Full=Os01g0581400 protein {ECO:0000313|EMBL:BAF05325.1}; SubName: Full=Serine threonine kinase 1-like {ECO:0000313|EMBL:BAD53152.1};	At5g12000	GO:0005524,ATP binding; GO:0106310,protein serine kinase activity; GO:0106311,protein threonine kinase activity; GO:0004842,ubiquitin-protein transferase activity; GO:0000166,nucleotide binding; GO:0003674,molecular_function; GO:0005488,binding; GO:0017076,purine nucleotide binding; GO:0030554,adenyl nucleotide binding; GO:0032553,ribonucleotide binding; GO:0032555,purine ribonucleotide binding; …
Os01g0581800	5.8215	7.2164	6.51895	1.1585	2.1205	1.2132	0.79135	1.0362	0.5465	1.7518	1.43	1.2426	164	209	186.5	35	93	47	29	41	17	80	62	55	-2.08677	7.30641e-15	3.56672e-13	down	-2.96394	1.60208e-32	6.19338e-31	down	-2.09073	9.12212e-21	5.34913e-19	down	1	22552874	22554531	-	Os01g0581800	Hypothetical conserved gene	--	--	--	RGA2_SOLBU RecName: Full=Disease resistance protein RGA2; AltName: Full=Blight resistance protein RPI; AltName: Full=RGA2-blb;	A0A0P0V4J7_ORYSJ SubName: Full=Os01g0581800 protein {ECO:0000313|EMBL:BAS72868.1};	--	GO:0043531,ADP binding; GO:0005524,ATP binding; GO:0006952,defense response; GO:0000166,nucleotide binding; GO:0003674,molecular_function; GO:0005488,binding; GO:0017076,purine nucleotide binding; GO:0030554,adenyl nucleotide binding; GO:0032553,ribonucleotide binding; GO:0032555,purine ribonucleotide binding; GO:0032559,adenyl ribonucleotide binding; GO:0036094,small molecule binding; GO:0043167…
Os01g0584900	35.1184	47.5931	41.3558	2.012	4.1929	5.8058	2.08375	1.9203	2.2472	10.5488	4.6266	3.1931	651	907	779	40	121	148	48	50	46	317	132	93	-3.34144	2.5634e-37	6.51521e-35	down	-4.27929	2.03604e-121	6.44571e-119	down	-2.71382	5.2261e-08	6.0632e-07	down	1	22731943	22733237	+	OsWRKY77	WRKY transcription factor 28-like (WRKY5) (WRKY transcription factor 77)	K18835 WRKY transcription factor 2 | (RefSeq) probable WRKY transcription factor 2 isoform X1 (A)	ko04626: Plant-pathogen interaction	--	WRK50_ARATH RecName: Full=Probable WRKY transcription factor 50; AltName: Full=WRKY DNA-binding protein 50;	Q94D50_ORYSJ SubName: Full=Os01g0584900 protein {ECO:0000313|EMBL:BAS72891.1}; SubName: Full=WRKY transcription factor 77 {ECO:0000313|EMBL:DAA05142.1}; SubName: Full=WRKY5 {ECO:0000313|EMBL:AAQ20905.1}; SubName: Full=cDNA clone:002-144-B05, full insert sequence {ECO:0000313|EMBL:BAG98428.1};	At5g26170	GO:0005634,nucleus; GO:0003700,DNA-binding transcription factor activity; GO:0043565,sequence-specific DNA binding; GO:0050832,defense response to fungus; GO:0009867,jasmonic acid mediated signaling pathway; GO:0003674,molecular_function; GO:0140110,transcription regulator activity; GO:0003676,nucleic acid binding; GO:0003677,DNA binding; GO:0005488,binding; GO:0097159,organic cyclic compound bin…
Os01g0585200	4.5444	5.29	4.9172	0.3473	0.7657	1.1377	0.62185	0.6365	0.6072	2.8493	0.8713	1.0906	61	73	67	5	16	21	10.5	12	9	62	18	23	-2.66522	1.32029e-10	3.69533e-09	down	-2.9625	2.06206e-15	3.03684e-14	down	-1.56894	0.000414125	0.00197297	down	1	22747354	22748143	+	Os01g0585200	Similar to cDNA clone:J023088C01%2C full insert sequence	--	--	--	--	Q7F3R4_ORYSJ SubName: Full=Os01g0585200 protein {ECO:0000313|EMBL:BAF05338.1};	--	GO:0016021,integral component of membrane; GO:0005575,cellular_component; GO:0016020,membrane; GO:0031224,intrinsic component of membrane; GO:0110165,cellular anatomical entity
Os01g0587300	0.6352	0.5472	0.5912	0.9645	0.7228	1.1218	1.30755	1.3825	1.2326	0.7277	1.3442	1.0396	35	31	33	57	62	85	91	107	75	65	114	90	0.680863	0.0436068	0.128444	false	1.19236	6.79641e-06	3.44556e-05	up	0.866476	0.0141609	0.0407671	false	1	22868546	22871788	-	Os01g0587300	Similar to C2 domain-containing protein	--	--	--	QKY_ARATH RecName: Full=Protein QUIRKY {ECO:0000303|PubMed:19180193};	A0A5S6R8F4_ORYSJ SubName: Full=Os01g0587300 protein {ECO:0000313|EMBL:BAF05344.2}; SubName: Full=Putative phosphoribosyltransferase {ECO:0000313|EMBL:BAB89913.1};	At1g74720	GO:0005829,cytosol; GO:0016021,integral component of membrane; GO:0005886,plasma membrane; GO:0009506,plasmodesma; GO:0099402,plant organ development; GO:0009911,positive regulation of flower development; GO:0007275,multicellular organism development; GO:0008150,biological_process; GO:0032501,multicellular organismal process; GO:0032502,developmental process; GO:0048731,system development; GO:004…
Os01g0587400	2.5169	3.2316	2.87425	1.7836	1.3451	1.6399	1.27995	1.2471	1.3128	2.0742	1.8708	1.5507	125	165	145	95	104	112	79.5	87	72	167	143	121	-0.840497	0.000167358	0.00136877	false	-1.12511	1.85361e-08	1.37463e-07	down	-0.598593	0.00427185	0.0148589	false	1	22879904	22895941	-	Os01g0587400	Serine/threonine protein kinase-related domain containing protein	K13430 serine/threonine-protein kinase PBS1 [EC:2.7.11.1] | (RefSeq) serine/threonine-protein kinase CDL1 isoform X1 (A)	ko04626: Plant-pathogen interaction	--	Y2913_ARATH RecName: Full=G-type lectin S-receptor-like serine/threonine-protein kinase At2g19130; EC=2.7.11.1; Flags: Precursor;	A0A0E0FNQ7_ORYNI RecName: Full=Receptor-like serine/threonine-protein kinase {ECO:0000256|PIRNR:PIRNR000641}; EC=2.7.11.1 {ECO:0000256|PIRNR:PIRNR000641};	At2g19130	GO:0016021,integral component of membrane; GO:0005886,plasma membrane; GO:0005524,ATP binding; GO:0005516,calmodulin binding; GO:0030246,carbohydrate binding; GO:0106310,protein serine kinase activity; GO:0004674,protein serine/threonine kinase activity; GO:0106311,protein threonine kinase activity; GO:0048544,recognition of pollen; GO:0000166,nucleotide binding; GO:0003674,molecular_function; GO…
Os01g0588400	11.2199	12.5702	11.895	3.6429	3.8609	4.8444	2.63315	2.3179	2.9484	5.0982	5.9231	3.9213	224	258	241	78	120	133	65	65	65	165	182	123	-1.50895	1.79128e-15	9.37035e-14	down	-2.14699	6.69855e-31	2.37408e-29	down	-1.20484	6.68281e-10	1.08191e-08	down	1	22914602	22916173	-	Os01g0588400	Band 7 protein family protein	--	--	--	HIR1_ORYSJ RecName: Full=Hypersensitive-induced response protein 1 {ECO:0000303|PubMed:19712067}; Short=OsHIR1 {ECO:0000303|PubMed:19712067};	A0A0E0FNR4_ORYNI RecName: Full=PHB domain-containing protein {ECO:0000259|SMART:SM00244};	At5g62740	GO:0005886,plasma membrane; GO:0005575,cellular_component; GO:0016020,membrane; GO:0071944,cell periphery; GO:0110165,cellular anatomical entity
Os01g0591300	38.7443	54.4729	46.6086	5.6327	8.3169	8.1132	4.3754	4.7771	3.9737	10.5602	7.2746	6.6503	1969	2846	2407.5	307	658	567	282	341	223	870	569	531	-2.64265	9.19747e-58	7.41601e-55	down	-3.36436	3.9734e-136	1.60491e-133	down	-2.46414	1.74101e-43	3.84287e-41	down	1	23113647	23120516	+	OsALDH2C1	Similar to Cytosolic aldehyde dehydrogenase RF2D	K12355 coniferyl-aldehyde dehydrogenase [EC:1.2.1.68] | (RefSeq) aldehyde dehydrogenase family 2 member C4 (A)	ko00940: Phenylpropanoid biosynthesis; ko01110: Biosynthesis of secondary metabolites	--	AL2C4_ARATH RecName: Full=Aldehyde dehydrogenase family 2 member C4; EC=1.2.1.3; AltName: Full=ALDH1a; AltName: Full=Protein REDUCED EPIDERMAL FLUORESCENCE 1;	A0A0N7KD90_ORYSJ SubName: Full=Os01g0591300 protein {ECO:0000313|EMBL:BAF05368.1}; SubName: Full=Putative cytosolic aldehyde dehydrogenase RF2D {ECO:0000313|EMBL:BAB55808.1};	At3g48000	GO:0005829,cytosol; GO:0004029,aldehyde dehydrogenase (NAD+) activity; GO:0050269,coniferyl-aldehyde dehydrogenase activity; GO:0043878,glyceraldehyde-3-phosphate dehydrogenase (NAD+) (non-phosphorylating) activity; GO:0009699,phenylpropanoid biosynthetic process; GO:0003674,molecular_function; GO:0003824,catalytic activity; GO:0004030,aldehyde dehydrogenase [NAD(P)+] activity; GO:0016491,oxidore…
Os01g0595600	12.7267	24.6576	18.6922	25.8646	23.9243	24.2889	5.4704	6.4719	4.4689	29.0313	14.3104	7.1414	245	488	366.5	534	717	643	135	175	95	906	424	216	0.421896	0.0414199	0.123503	false	-1.71816	8.78344e-14	1.13309e-12	down	-0.110324	0.853524	0.906693	false	1	23343306	23345362	+	Os01g0595600	Alpha/beta hydrolase fold-1 domain containing protein	--	--	--	D14_ORYSJ RecName: Full=Strigolactone esterase D14 {ECO:0000305}; EC=3.1.-.- {ECO:0000305}; AltName: Full=Protein DWARF 14 {ECO:0000303|PubMed:19542179}; AltName: Full=Protein DWARF 88 {ECO:0000303|PubMed:19603144}; AltName: Full=Protein HIGH-TILLERING DWARF 2 {ECO:0000303|PubMed:19579033};	Q8L562_ORYSJ SubName: Full=Os01g0595600 protein {ECO:0000313|EMBL:BAS72984.1}; SubName: Full=cDNA clone:J013082F17, full insert sequence {ECO:0000313|EMBL:BAG90135.1};	At3g24420	GO:0005737,cytoplasm; GO:0005634,nucleus; GO:0016787,hydrolase activity; GO:0010223,secondary shoot formation; GO:1901601,strigolactone biosynthetic process; GO:0003674,molecular_function; GO:0003824,catalytic activity; GO:0001763,morphogenesis of a branching structure; GO:0007275,multicellular organism development; GO:0008150,biological_process; GO:0009653,anatomical structure morphogenesis; GO:…
Os01g0597600	0.0777	0.0756	0.07665	1.1229	4.4917	2.5425	2.2233	2.4062	2.0404	0.3355	1.1106	0.4945	2	2	2	31	180	90	72.5	87	58	14	44	20	5.17098	1.42535e-11	4.52225e-10	up	4.90333	1.11513e-13	1.42599e-12	up	NA	NA	NA	NA	1	23447173	23448687	+	OsATL15	Amino acid transporter%2C transmembrane domain containing protein	K15015 solute carrier family 32 (vesicular inhibitory amino acid transporter) | (RefSeq) vacuolar amino acid transporter 1 (A)	--	--	AVT1J_ARATH RecName: Full=Amino acid transporter AVT1J {ECO:0000305}; Short=AtAvt1J {ECO:0000303|PubMed:27925655};	Q0JLI4_ORYSJ SubName: Full=Os01g0597600 protein {ECO:0000313|EMBL:BAF05394.2};	At5g15240	GO:0016021,integral component of membrane; GO:0005886,plasma membrane; GO:0005774,vacuolar membrane; GO:0006865,amino acid transport; GO:0006810,transport; GO:0006811,ion transport; GO:0006820,anion transport; GO:0008150,biological_process; GO:0015849,organic acid transport; GO:0051179,localization; GO:0051234,establishment of localization; GO:0071702,organic substance transport; GO:0071705,nitro…
Os01g0597800	4.2296	5.4564	4.843	0.6153	0.7322	1.0471	0.42705	0.5553	0.2988	0.8882	0.2924	0.8019	141	187	164	22	38	48	18.5	26	11	48	15	42	-2.5735	1.61782e-21	1.35105e-19	down	-3.43754	5.40122e-34	2.2199e-32	down	-2.81751	3.09209e-16	1.16125e-14	down	1	23456074	23458035	+	Os01g0597800	UDP-glucuronosyl/UDP-glucosyltransferase family protein	K22771 flavonol-3-O-L-rhamnoside-7-O-glucosyltransferase [EC:2.4.1.-] | (RefSeq) UDP-glycosyltransferase 73C6 (A)	ko00944: Flavone and flavonol biosynthesis	--	SCGT_TOBAC RecName: Full=Scopoletin glucosyltransferase; EC=2.4.1.128; AltName: Full=Phenylpropanoid:glucosyltransferase 1;	I1NPD9_ORYGL RecName: Full=Glycosyltransferase {ECO:0000256|RuleBase:RU362057}; EC=2.4.1.- {ECO:0000256|RuleBase:RU362057};	At2g15480	GO:0042802,identical protein binding; GO:0050275,scopoletin glucosyltransferase activity; GO:0003674,molecular_function; GO:0005488,binding; GO:0005515,protein binding; GO:0003824,catalytic activity; GO:0008194,UDP-glycosyltransferase activity; GO:0016740,transferase activity; GO:0016757,transferase activity, transferring glycosyl groups; GO:0016758,transferase activity, transferring hexosyl grou…
Os01g0598200	1.0454	1.1185	1.08195	0	0.2014	0.19	0.13025	0.2605	0	0.0967	0	0	20	22	21	0	6	5	3.5	7	0	3	0	0	-2.9552	7.00581e-05	0.00064016	down	-2.82674	3.84622e-05	0.000172649	down	-4.99029	1.77116e-06	1.50036e-05	down	1	23498445	23502375	+	OsCBL5	Similar to Calcineurin B-like protein 8	K06268 serine/threonine-protein phosphatase 2B regulatory subunit | (RefSeq) calcineurin B-like protein 5 isoform X3 (A)	--	--	CNBL5_ORYSJ RecName: Full=Calcineurin B-like protein 5;	A0A0D3EQV0_9ORYZ SubName: Full=Uncharacterized protein {ECO:0000313|EnsemblPlants:OBART01G21610.1};	At5g24270	GO:0005509,calcium ion binding; GO:0003674,molecular_function; GO:0005488,binding; GO:0043167,ion binding; GO:0043169,cation binding; GO:0046872,metal ion binding
Os01g0598600	4.7204	3.8426	4.2815	1.5608	2.4085	2.3615	0.98675	1.2156	0.7579	1.8793	0.8701	1.3211	141	118	129.5	50	112	97	38	51	25	91	40	62	-0.993431	5.34536e-05	0.000505217	false	-2.0531	2.03046e-16	3.27827e-15	down	-1.60726	8.42635e-08	9.42406e-07	down	1	23515008	23516765	+	Os01g0598600	Peptidase A1 domain containing protein	K22683 aspartyl protease family protein [EC:3.4.23.-] | (RefSeq) protein ASPARTIC PROTEASE IN GUARD CELL 2 isoform X1 (A)	--	--	APF2_ARATH RecName: Full=Aspartyl protease family protein 2 {ECO:0000305}; EC=3.4.23.- {ECO:0000305}; Flags: Precursor;	Q0JLH9_ORYSJ SubName: Full=Nucleoid DNA-binding protein cnd41-like {ECO:0000313|EMBL:BAB63755.1}; SubName: Full=Os01g0598600 protein {ECO:0000313|EMBL:BAF05399.1};	At1g01300	GO:0009505,plant-type cell wall; GO:0004190,aspartic-type endopeptidase activity; GO:0080167,response to karrikin; GO:0003674,molecular_function; GO:0003824,catalytic activity; GO:0004175,endopeptidase activity; GO:0008233,peptidase activity; GO:0016787,hydrolase activity; GO:0070001,aspartic-type peptidase activity; GO:0140096,catalytic activity, acting on a protein; GO:0008150,biological_proces…
Os01g0601651	0.6596	1.0791	0.86935	0.5871	0.52	0.6541	0.39865	0.3629	0.4344	0.6103	0.487	0.458	22	37	29.5	21	27	30	16.5	17	16	33	25	24	-0.558296	0.185802	0.360458	false	-1.11581	0.00777643	0.0203481	down	-0.702472	0.0959799	0.188188	false	1	23637263	23640649	+	Os01g0601651	Plant disease resistance response protein domain containing protein	--	--	--	DIR21_ARATH RecName: Full=Dirigent protein 21; Short=AtDIR21; Flags: Precursor;	A0A0P0V4W6_ORYSJ RecName: Full=Dirigent protein {ECO:0000256|RuleBase:RU363099}; Flags: Fragment;	At1g65870	GO:0005618,cell wall; GO:0005576,extracellular region; GO:0005575,cellular_component; GO:0030312,external encapsulating structure; GO:0071944,cell periphery; GO:0110165,cellular anatomical entity
Os01g0602400	0.7142	0.7263	0.72025	0.3632	0.3128	0.2361	0.2678	0.3004	0.2352	0.1602	0.0633	0.2273	22	23	22.5	12	15	10	10.5	13	8	8	3	11	-1.22087	0.0178046	0.0645666	false	-1.38516	0.0039681	0.0112748	down	-2.19103	0.000392274	0.00189043	down	1	23673178	23675960	-	OsCYP72A32	Similar to Cytochrome P450 monooxygenase CYP72A5 (Fragment)	K20660 cytochrome P450 family 709 | (RefSeq) cytochrome P450 709B2 (A)	--	--	C7A39_KALSE RecName: Full=Cytochrome P450 72A397; EC=1.14.14.- {ECO:0000269|PubMed:29186583};	Q7F4T5_ORYSJ SubName: Full=Cytochrome P450 (CYP72C)-like {ECO:0000313|EMBL:BAB91724.1}; SubName: Full=Os01g0602400 protein {ECO:0000313|EMBL:BAF05412.1};	At3g14690	GO:0016021,integral component of membrane; GO:0020037,heme binding; GO:0005506,iron ion binding; GO:0016712,oxidoreductase activity, acting on paired donors, with incorporation or reduction of molecular oxygen, reduced flavin or flavoprotein as one donor, and incorporation of one atom of oxygen; GO:0016134,saponin metabolic process; GO:0003674,molecular_function; GO:0005488,binding; GO:0046906,te…
Os01g0602466	7.3174	8.1734	7.7454	2.3505	2.8112	3.0807	2.2641	1.7698	2.7584	2.1165	2.4113	2.0947	209	240	224.5	72	125	121	79	71	87	98	106	94	-1.46924	1.00725e-14	4.8462e-13	down	-1.75149	2.1675e-18	3.99199e-17	down	-1.75715	2.62007e-21	1.63471e-19	down	1	23682415	23685494	+	Os01g0602466	Hypothetical protein	K20660 cytochrome P450 family 709 | (RefSeq) cytochrome P450 709B2 (A)	--	--	C7A39_KALSE RecName: Full=Cytochrome P450 72A397; EC=1.14.14.- {ECO:0000269|PubMed:29186583};	A0A0E3VYD2_ORYSJ SubName: Full=Cytochrome P450 monooxygenase {ECO:0000313|EMBL:BAR64205.1};	At3g14690	GO:0016021,integral component of membrane; GO:0020037,heme binding; GO:0005506,iron ion binding; GO:0016712,oxidoreductase activity, acting on paired donors, with incorporation or reduction of molecular oxygen, reduced flavin or flavoprotein as one donor, and incorporation of one atom of oxygen; GO:0016134,saponin metabolic process; GO:0003674,molecular_function; GO:0005488,binding; GO:0046906,te…
Os01g0604600	1.9521	2.8685	2.4103	1.0457	0.9071	0.9061	1.04935	0.8575	1.2412	0.9736	1.1064	0.9253	47	71	59	27	34	30	31	29	33	38	41	35	-1.32464	0.000101476	0.000885381	down	-1.17584	0.000200406	0.000776532	down	-1.21454	0.0002016	0.00105735	down	1	23813192	23814608	+	Os01g0604600	Carbohydrate kinase%2C FGGY family protein	K00854 xylulokinase [EC:2.7.1.17] | (RefSeq) xylulose kinase isoform X1 (A)	ko00040: Pentose and glucuronate interconversions; ko01100: Metabolic pathways	--	XK2_ARATH RecName: Full=Xylulose kinase 2 {ECO:0000303|PubMed:16920870}; Short=Atxk-2 {ECO:0000303|PubMed:16920870}; Short=Xylulokinase 2 {ECO:0000305}; EC=2.7.1.17 {ECO:0000269|PubMed:16920870}; AltName: Full=1-Deoxy-D-Xylulokinase {ECO:0000303|PubMed:16920870}; Short=DXK {ECO:0000303|PubMed:16920870};	A2ZV70_ORYSJ SubName: Full=Uncharacterized protein {ECO:0000313|EMBL:EAZ12617.1};	At5g49650	GO:0005829,cytosol; GO:0009536,plastid; GO:0005524,ATP binding; GO:0016773,phosphotransferase activity, alcohol group as acceptor; GO:0004856,xylulokinase activity; GO:0016117,carotenoid biosynthetic process; GO:0042732,D-xylose metabolic process; GO:0016310,phosphorylation; GO:0005997,xylulose metabolic process; GO:0000166,nucleotide binding; GO:0003674,molecular_function; GO:0005488,binding; GO…
Os01g0605700	0.8908	1.1554	1.0231	1.329	1.5259	1.1661	1.4257	1.7758	1.0756	3.0407	2.431	2.1924	15	20	17.5	24	40	27	31	42	20	83	63	58	0.397427	0.378004	0.574937	false	0.525428	0.2047	0.310973	false	1.35687	0.000385532	0.00186177	up	1	23864681	23867205	+	OsSWEET6b	MtN3 and saliva related transmembrane protein family protein	K15382 solute carrier family 50 (sugar transporter) | (RefSeq) bidirectional sugar transporter SWEET6b (A)	--	--	SWT6B_ORYSJ RecName: Full=Bidirectional sugar transporter SWEET6b; Short=OsSWEET6b;	A0A0D3ER12_9ORYZ RecName: Full=Bidirectional sugar transporter SWEET {ECO:0000256|RuleBase:RU910715};	At1g66770	GO:0016021,integral component of membrane; GO:0005887,integral component of plasma membrane; GO:0051119,sugar transmembrane transporter activity; GO:0008643,carbohydrate transport; GO:0003674,molecular_function; GO:0005215,transporter activity; GO:0008509,anion transmembrane transporter activity; GO:0015075,ion transmembrane transporter activity; GO:0015144,carbohydrate transmembrane transporter …
Os01g0607900	4.0091	3.1515	3.5803	2.5863	2.0362	4.3222	4.5966	3.684	5.5092	4.8742	5.4672	11.0227	172	139	155.5	119	136	255	241.5	222	261	339	361	743	-0.246761	0.373734	0.57129	false	0.391035	0.0490661	0.0968139	false	1.05341	0.000534492	0.00246706	up	1	23976021	23981901	-	OsRPK1	Serine/threonine protein kinase-related domain containing protein	K13415 protein brassinosteroid insensitive 1 [EC:2.7.10.1 2.7.11.1] | (RefSeq) systemin receptor SR160 (A)	ko04075: Plant hormone signal transduction	--	Y2267_ARATH RecName: Full=Probable inactive receptor kinase At2g26730; Flags: Precursor;	Q5ZBN0_ORYSJ SubName: Full=Os01g0607900 protein {ECO:0000313|EMBL:BAS73090.1}; SubName: Full=cDNA, clone: J100082A19, full insert sequence {ECO:0000313|EMBL:BAH01653.1};	At2g26730	GO:0016021,integral component of membrane; GO:0005777,peroxisome; GO:0005886,plasma membrane; GO:0005524,ATP binding; GO:0004672,protein kinase activity; GO:0000166,nucleotide binding; GO:0003674,molecular_function; GO:0005488,binding; GO:0017076,purine nucleotide binding; GO:0030554,adenyl nucleotide binding; GO:0032553,ribonucleotide binding; GO:0032555,purine ribonucleotide binding; GO:0032559…
Os01g0608400	1.5228	2.1848	1.8538	0.6389	1.1493	0.7751	0.7267	0.8673	0.5861	0.7984	0.4452	0.4119	40	59	49.5	18	47	28	24.5	32	17	34	18	17	-1.0894	0.00403227	0.0201123	down	-1.30601	0.000125763	0.000509027	down	-1.7019	3.11501e-05	0.000201721	down	1	24024938	24027535	-	Os01g0608400	Hypothetical conserved gene	K13457 disease resistance protein RPM1 | (RefSeq) disease resistance protein RPM1 isoform X1 (A)	ko04626: Plant-pathogen interaction	--	RGA2_SOLBU RecName: Full=Disease resistance protein RGA2; AltName: Full=Blight resistance protein RPI; AltName: Full=RGA2-blb;	B9EY03_ORYSJ RecName: Full=AAA domain-containing protein {ECO:0000259|SMART:SM00382};	At1g58410	GO:0043531,ADP binding; GO:0005524,ATP binding; GO:0006952,defense response; GO:0000166,nucleotide binding; GO:0003674,molecular_function; GO:0005488,binding; GO:0017076,purine nucleotide binding; GO:0030554,adenyl nucleotide binding; GO:0032553,ribonucleotide binding; GO:0032555,purine ribonucleotide binding; GO:0032559,adenyl ribonucleotide binding; GO:0036094,small molecule binding; GO:0043167…
Os01g0609200	0.4017	0.8727	0.6372	5.519	2.1935	0.8083	3.1788	2.3072	4.0504	0.3552	0.7483	0.8864	30	67	48.5	442	255	83	288	242	334	43	86	104	2.19138	0.00665621	0.0298165	up	2.3511	1.78007e-16	2.88993e-15	up	0.123172	0.776071	0.85416	false	1	24065207	24073621	-	OsABCG35	Similar to Pleiotropic drug resistance protein 3	K05681 ATP-binding cassette, subfamily G (WHITE), member 2 | (RefSeq) ABC transporter G family member 25 (A)	ko02010: ABC transporters	--	AB35G_ORYSJ RecName: Full=ABC transporter G family member 35 {ECO:0000303|PubMed:18299247}; Short=OsABCG35 {ECO:0000303|PubMed:18299247}; AltName: Full=Pleiotropic drug resistance protein 11 {ECO:0000303|PubMed:12644668, ECO:0000303|PubMed:16506311}; Short=OsPDR11 {ECO:0000303|PubMed:16506311};	B9EY04_ORYSJ SubName: Full=Uncharacterized protein {ECO:0000313|EMBL:EEE54967.1};	At1g15520	GO:0016021,integral component of membrane; GO:0005524,ATP binding; GO:0042626,ATPase-coupled transmembrane transporter activity; GO:0000166,nucleotide binding; GO:0003674,molecular_function; GO:0005488,binding; GO:0017076,purine nucleotide binding; GO:0030554,adenyl nucleotide binding; GO:0032553,ribonucleotide binding; GO:0032555,purine ribonucleotide binding; GO:0032559,adenyl ribonucleotide bi…
Os01g0609501	7.5835	17.9602	12.7719	6.3025	10.7485	8.6316	7.6034	9.683	5.5238	4.7797	4.9808	3.4102	92	224	158	82	203	144	119.5	165	74	94	93	65	-0.555637	0.0742257	0.189644	false	-0.688632	0.0202102	0.0460883	false	-1.48971	3.93518e-06	3.09856e-05	down	1	24080593	24081885	+	Os01g0609501	Hypothetical protein	K05681 ATP-binding cassette, subfamily G (WHITE), member 2 | (RefSeq) ABC transporter G family member 14 (A)	ko02010: ABC transporters	--	AB36G_ORYSI RecName: Full=ABC transporter G family member 36 {ECO:0000305}; Short=OsABCG36 {ECO:0000305}; AltName: Full=Pleiotropic drug resistance protein 9 {ECO:0000303|PubMed:14572653}; Short=OsPDR9 {ECO:0000303|PubMed:14572653};	A0A0P0V525_ORYSJ SubName: Full=Os01g0609501 protein {ECO:0000313|EMBL:BAS73103.1}; Flags: Fragment;	At3g16340	GO:0016021,integral component of membrane; GO:0005524,ATP binding; GO:0042626,ATPase-coupled transmembrane transporter activity; GO:0000166,nucleotide binding; GO:0003674,molecular_function; GO:0005488,binding; GO:0017076,purine nucleotide binding; GO:0030554,adenyl nucleotide binding; GO:0032553,ribonucleotide binding; GO:0032555,purine ribonucleotide binding; GO:0032559,adenyl ribonucleotide bi…
Os01g0609900	15.896	20.9048	18.4004	4.6034	5.0271	6.1521	4.0418	4.8601	3.2235	5.7751	3.5483	3.119	1304	1763	1533.5	405	642	694	426	560	292	768	448	402	-1.78639	2.11551e-35	4.71115e-33	down	-2.13255	2.69202e-47	1.75183e-45	down	-2.1016	7.60733e-25	5.9528e-23	down	1	24107086	24115287	-	OsPDR8	Similar to Pleiotropic drug resistance protein 4	K05681 ATP-binding cassette, subfamily G (WHITE), member 2 | (RefSeq) ABC transporter G family member 25 (A)	ko02010: ABC transporters	--	AB37G_ORYSJ RecName: Full=ABC transporter G family member 37 {ECO:0000303|PubMed:18299247}; Short=OsABCG37 {ECO:0000303|PubMed:18299247}; AltName: Full=Pleiotropic drug resistance protein 8 {ECO:0000303|PubMed:12644668, ECO:0000303|PubMed:16506311}; Short=OsPDR8 {ECO:0000303|PubMed:16506311};	I1NPJ5_ORYGL SubName: Full=Uncharacterized protein {ECO:0000313|EnsemblPlants:ORGLA01G0178500.1};	At1g15520	GO:0016021,integral component of membrane; GO:0005524,ATP binding; GO:0042626,ATPase-coupled transmembrane transporter activity; GO:0000166,nucleotide binding; GO:0003674,molecular_function; GO:0005488,binding; GO:0017076,purine nucleotide binding; GO:0030554,adenyl nucleotide binding; GO:0032553,ribonucleotide binding; GO:0032555,purine ribonucleotide binding; GO:0032559,adenyl ribonucleotide bi…
Os01g0611000	1.5699	2.2058	1.88785	0.2928	0.2241	0.8372	0.25515	0.4471	0.0632	0.9254	0.204	0.9548	45	65	55	9	10	33	10	18	2	43	9	43	-2.0445	3.36135e-05	0.000337913	down	-2.76602	2.31826e-09	1.9184e-08	down	-1.38567	0.0064561	0.0211382	down	1	24181111	24183979	+	Os01g0611000	Protein of unknown function DUF642 domain containing protein	--	--	--	--	Q0JLB5_ORYSJ SubName: Full=Os01g0611000 protein {ECO:0000313|EMBL:BAF05463.2}; Flags: Fragment;	At5g11420	--
Os01g0612500	1.6185	1.0496	1.33405	2.2866	3.686	4.0302	3.94435	3.4917	4.397	4.2054	5.7041	4.9946	33	22	27.5	50	117	113	99.5	100	99	139	179	160	1.33843	0.000161431	0.00132587	up	1.59429	3.41635e-08	2.44381e-07	up	1.94446	1.54089e-10	2.75628e-09	up	1	24277095	24280999	+	OsPOP2	Phospholipase/carboxylesterase domain containing protein	K06130 lysophospholipase II [EC:3.1.1.5] | (RefSeq) acyl-protein thioesterase 1 homolog 1 isoform X1 (A)	ko00564: Glycerophospholipid metabolism	--	CAEH1_ORYSJ RecName: Full=Probable carboxylesterase Os04g0669500 {ECO:0000305}; EC=3.1.1.- {ECO:0000305};	Q5ZBI5_ORYSJ SubName: Full=Os01g0612500 protein {ECO:0000313|EMBL:BAS73131.1}; SubName: Full=cDNA clone:J023004J23, full insert sequence {ECO:0000313|EMBL:BAG91270.1};	At3g15650	GO:0005737,cytoplasm; GO:0052689,carboxylic ester hydrolase activity; GO:0008474,palmitoyl-(protein) hydrolase activity; GO:0006631,fatty acid metabolic process; GO:0002084,protein depalmitoylation; GO:0003674,molecular_function; GO:0003824,catalytic activity; GO:0016787,hydrolase activity; GO:0016788,hydrolase activity, acting on ester bonds; GO:0016790,thiolester hydrolase activity; GO:0098599,…
Os01g0613800	2.0852	1.6558	1.8705	0.6746	0.5194	0.8974	0.53145	0.4848	0.5781	1.2338	0.9954	0.948	49	40	44.5	17	19	29	15.5	16	15	47	36	35	-1.40257	0.000437882	0.00312641	down	-1.76239	2.23591e-06	1.22786e-05	down	-0.762404	0.0256747	0.0661649	false	1	24351308	24353345	-	Os01g0613800	Peptidase C1A%2C papain family protein	K16290 xylem cysteine proteinase [EC:3.4.22.-] | (RefSeq) xylem cysteine proteinase 2 (A)	--	--	SAG39_ORYSJ RecName: Full=Senescence-specific cysteine protease SAG39 {ECO:0000305}; EC=3.4.22.- {ECO:0000305}; AltName: Full=Cysteine proteinase SAG39 {ECO:0000305}; AltName: Full=Protein SENESCENCE-ASSOCIATED GENE 39 {ECO:0000303|PubMed:20439547}; Flags: Precursor;	A0A0P0V562_ORYSJ SubName: Full=Cysteine proteinase-like {ECO:0000313|EMBL:BAB17098.1}; SubName: Full=Os01g0613800 protein {ECO:0000313|EMBL:BAF05477.1};	At2g27420	GO:0005615,extracellular space; GO:0005764,lysosome; GO:0010282,senescence-associated vacuole; GO:0004197,cysteine-type endopeptidase activity; GO:0007568,aging; GO:0010150,leaf senescence; GO:0010623,programmed cell death involved in cell development; GO:0051603,proteolysis involved in cellular protein catabolic process; GO:0009737,response to abscisic acid; GO:0009723,response to ethylene; GO:0…
Os01g0615050	47.7445	61.1779	54.4612	38.6112	22.3527	63.8304	17.056	16.7342	17.3778	78.6141	30.5441	18.1745	520	685	602.5	451	379	956	232.5	256	209	1388	512	311	-0.370055	0.391874	0.588516	false	-1.63526	1.13363e-34	4.7509e-33	down	-0.320362	0.590521	0.714483	false	1	24390676	24391763	-	Os01g0615050	Proteinase inhibitor I13%2C potato inhibitor I family protein	--	--	--	ICI2_HORVU RecName: Full=Subtilisin-chymotrypsin inhibitor-2A; Short=CI-2A;	A0A0E0MZ92_ORYRU SubName: Full=Uncharacterized protein {ECO:0000313|EnsemblPlants:ORUFI01G25490.1};	At5g43580	GO:0004867,serine-type endopeptidase inhibitor activity; GO:0009611,response to wounding; GO:0003674,molecular_function; GO:0004857,enzyme inhibitor activity; GO:0004866,endopeptidase inhibitor activity; GO:0030234,enzyme regulator activity; GO:0030414,peptidase inhibitor activity; GO:0061134,peptidase regulator activity; GO:0061135,endopeptidase regulator activity; GO:0098772,molecular function …
Os01g0618700	3.8055	2.6368	3.22115	0.6319	1.038	1.4405	0.8938	0.8907	0.8969	1.0612	0.5081	0.6968	73	52	62.5	13	31	38	21.5	24	19	33	15	21	-1.59815	2.74369e-05	0.000283331	down	-1.79251	4.39096e-08	3.09374e-07	down	-2.03481	1.88638e-07	1.95984e-06	down	1	24614231	24615465	+	Os01g0618700	Lipase%2C class 3 family protein	--	--	--	PLIP1_ARATH RecName: Full=Phospholipase A1 PLIP1, chloroplastic {ECO:0000305}; EC=3.1.1.32 {ECO:0000269|PubMed:28687655}; AltName: Full=Galactolipase PLIP1 {ECO:0000305}; EC=3.1.1.26 {ECO:0000269|PubMed:28687655}; AltName: Full=Protein PLASTID LIPASE 1 {ECO:0000303|PubMed:28687655}; Flags: Precursor;	C7IXA7_ORYSJ SubName: Full=Os01g0618700 protein {ECO:0000313|EMBL:BAS73192.1};	At3g61680	GO:0009534,chloroplast thylakoid; GO:0009535,chloroplast thylakoid membrane; GO:0102549,1-18:1-2-16:0-monogalactosyldiacylglycerol lipase activity; GO:0052740,1-acyl-2-lysophosphatidylserine acylhydrolase activity; GO:0047714,galactolipase activity; GO:0052739,phosphatidylserine 1-acylhydrolase activity; GO:0008970,phospholipase A1 activity; GO:0015908,fatty acid transport; GO:0016042,lipid catab…
Os01g0621200	5.3539	4.7517	5.0528	0.8017	1.8325	1.6483	1.59675	1.5302	1.6633	4.2428	1.2188	1.2934	137	125	131	22	73	58	51	55	47	176	48	52	-1.78605	1.78606e-09	4.27467e-08	down	-1.62439	9.56306e-14	1.23028e-12	down	-1.12371	0.00811693	0.0255774	down	1	24753864	24758578	-	OsGAT2	Similar to proline transporter	K24917 amino acid permease | (RefSeq) amino acid permease 3 (A)	--	--	GAT2_ARATH RecName: Full=Probable GABA transporter 2;	A0A0P0V5C2_ORYSJ SubName: Full=Os01g0621200 protein {ECO:0000313|EMBL:BAS73210.1};	At5g41800	GO:0016021,integral component of membrane; GO:0005886,plasma membrane; GO:0006865,amino acid transport; GO:0006810,transport; GO:0006811,ion transport; GO:0006820,anion transport; GO:0008150,biological_process; GO:0015849,organic acid transport; GO:0051179,localization; GO:0051234,establishment of localization; GO:0071702,organic substance transport; GO:0071705,nitrogen compound transport; GO:000…
Os01g0621600	2.4781	1.8939	2.186	0.3714	0.5827	0.9815	0.4674	0.3938	0.541	0.5869	0.5894	0.7323	112	88	100	18	41	61	26	25	27	43	41	52	-1.73092	5.95736e-07	9.04552e-06	down	-2.2011	8.61758e-15	1.20384e-13	down	-1.72551	6.96959e-10	1.12151e-08	down	1	24784609	24788153	-	Os01g0621600	Serine/threonine protein kinase-related domain containing protein	K04424 sterile alpha motif and leucine zipper containing kinase AZK [EC:2.7.11.25] | (RefSeq) serine/threonine-protein kinase EDR1 (A)	--	--	PHY1_CERPU RecName: Full=Light-sensor Protein kinase; Includes: RecName: Full=Phytochrome; Includes: RecName: Full=Protein kinase; EC=2.7.11.1;	A2ZVI0_ORYSJ SubName: Full=Os01g0621600 protein {ECO:0000313|EMBL:BAF05519.1}; SubName: Full=Phytochrome / protein kinase-like {ECO:0000313|EMBL:BAB21072.1};	At5g41730	GO:0005886,plasma membrane; GO:0005524,ATP binding; GO:0009881,photoreceptor activity; GO:0106310,protein serine kinase activity; GO:0106311,protein threonine kinase activity; GO:0009584,detection of visible light; GO:0018298,protein-chromophore linkage; GO:0006355,regulation of transcription, DNA-templated; GO:0000166,nucleotide binding; GO:0003674,molecular_function; GO:0005488,binding; GO:0017…
Os01g0623900	0.8174	1.0336	0.9255	0.343	0.21	0.6539	0.3649	0.1746	0.5552	0.9833	0.6373	0.8845	20	26	23	9	8	22	10.5	6	15	39	24	34	-1.18756	0.0363981	0.112341	false	-1.37452	0.00916537	0.0234075	down	-0.0950016	0.824862	0.887365	false	1	24908651	24910090	+	Os01g0623900	Conserved hypothetical protein	--	--	--	--	A0A0E0MZG2_ORYRU SubName: Full=Uncharacterized protein {ECO:0000313|EnsemblPlants:ORUFI01G26070.1};	--	GO:0005886,plasma membrane; GO:0005575,cellular_component; GO:0016020,membrane; GO:0071944,cell periphery; GO:0110165,cellular anatomical entity
Os01g0625200	5.6995	3.1062	4.40285	3.0153	2.4926	5.8789	5.07485	3.5973	6.5524	7.6051	5.1214	13.1468	141	79	110	80	96	200	152	125	179	305	195	511	-0.194822	0.574965	0.744072	false	0.232173	0.408822	0.532204	false	1.03079	0.00321194	0.0116983	up	1	24961079	24962826	+	Os01g0625200	Similar to kinesin motor family protein	K10393 kinesin family member 2/24 | (RefSeq) kinesin-13A (A)	--	--	KN13B_ORYSJ RecName: Full=Kinesin-like protein KIN-13B {ECO:0000305};	A0A0E0MZG8_ORYRU RecName: Full=Kinesin-like protein {ECO:0000256|RuleBase:RU000394};	At3g16060	GO:0005874,microtubule; GO:0005524,ATP binding; GO:1990939,ATP-dependent microtubule motor activity; GO:0008017,microtubule binding; GO:0007018,microtubule-based movement; GO:0000166,nucleotide binding; GO:0003674,molecular_function; GO:0005488,binding; GO:0017076,purine nucleotide binding; GO:0030554,adenyl nucleotide binding; GO:0032553,ribonucleotide binding; GO:0032555,purine ribonucleotide b…
Os01g0626400	10.8084	10.3983	10.6034	1.9126	3.9021	4.8765	2.7757	2.8365	2.7149	5.5236	2.3836	4.0924	274	271	272.5	52	154	170	88.5	101	76	227	93	163	-1.54668	9.56229e-09	2.02532e-07	down	-1.89146	1.54998e-31	5.65598e-30	down	-1.35394	3.88294e-07	3.78538e-06	down	1	25009514	25012233	+	WRKY11	WRKY transcription factor%2C Control of flowering time and plant heigh	K18835 WRKY transcription factor 2 | (RefSeq) probable WRKY transcription factor 2 (A)	ko04626: Plant-pathogen interaction	--	WRK28_ARATH RecName: Full=WRKY transcription factor 28; AltName: Full=WRKY DNA-binding protein 28;	Q9FE35_ORYSJ SubName: Full=Os01g0626400 protein {ECO:0000313|EMBL:BAS73255.1}; SubName: Full=WRKY transcription factor {ECO:0000313|EMBL:ADX60269.1}; SubName: Full=WRKY transcription factor 11 {ECO:0000313|EMBL:DAA05076.1}; SubName: Full=WRKY16 {ECO:0000313|EMBL:AAQ20915.1}; SubName: Full=cDNA clone:002-150-E09, full insert sequence {ECO:0000313|EMBL:BAG98512.1};	At4g18170	GO:0005634,nucleus; GO:0003700,DNA-binding transcription factor activity; GO:0043565,sequence-specific DNA binding; GO:1900057,positive regulation of leaf senescence; GO:0042659,regulation of cell fate specification; GO:0003674,molecular_function; GO:0140110,transcription regulator activity; GO:0003676,nucleic acid binding; GO:0003677,DNA binding; GO:0005488,binding; GO:0097159,organic cyclic com…
Os01g0627800	3.2997	6.7694	5.03455	0.028	0.212	0.2181	0.27565	0.4698	0.0815	0.0555	0.0195	0.0191	110	232	171	1	11	10	12.5	22	3	3	1	1	-4.95162	3.87577e-28	5.39447e-26	down	-4.09239	1.00325e-24	2.60566e-23	down	-7.2608	5.65182e-24	4.22624e-22	down	1	25060764	25063562	+	Os01g0627800	Similar to Cytochrome P450 monooxygenase CYP72A5 (Fragment)	K15639 PHYB activation tagged suppressor 1 [EC:1.14.-.-] | (RefSeq) cytochrome P450 734A6 (A)	ko00905: Brassinosteroid biosynthesis; ko01110: Biosynthesis of secondary metabolites	--	C7A13_ARATH RecName: Full=Cytochrome P450 72A13; EC=1.14.-.-;	Q5ZE52_ORYSJ SubName: Full=Os01g0627800 protein {ECO:0000313|EMBL:BAS73265.1}; SubName: Full=cDNA clone:J033063B21, full insert sequence {ECO:0000313|EMBL:BAG95211.1};	At3g14660	GO:0016021,integral component of membrane; GO:0020037,heme binding; GO:0005506,iron ion binding; GO:0004497,monooxygenase activity; GO:0016705,oxidoreductase activity, acting on paired donors, with incorporation or reduction of molecular oxygen; GO:0003674,molecular_function; GO:0005488,binding; GO:0046906,tetrapyrrole binding; GO:0097159,organic cyclic compound binding; GO:1901363,heterocyclic c…
Os01g0628900	0.7054	0.5555	0.63045	0.0626	0.151	0.0489	0.05105	0.0717	0.0304	0.1451	0.1091	0.171	21	17	19	2	7	2	2	3	1	7	5	8	-2.78673	0.000147245	0.00123053	down	-3.52807	6.04467e-06	3.09256e-05	down	-2.09701	0.000635887	0.00288104	down	1	25119734	25121919	+	Os01g0628900	Cytochrome P450 family protein	K20660 cytochrome P450 family 709 | (RefSeq) cytochrome P450 709B2 (A)	--	--	C7A39_KALSE RecName: Full=Cytochrome P450 72A397; EC=1.14.14.- {ECO:0000269|PubMed:29186583};	A0A0E0FPR9_ORYNI SubName: Full=Uncharacterized protein {ECO:0000313|EnsemblPlants:ONIVA01G26470.1};	At3g14680	GO:0016021,integral component of membrane; GO:0020037,heme binding; GO:0005506,iron ion binding; GO:0016712,oxidoreductase activity, acting on paired donors, with incorporation or reduction of molecular oxygen, reduced flavin or flavoprotein as one donor, and incorporation of one atom of oxygen; GO:0016134,saponin metabolic process; GO:0003674,molecular_function; GO:0005488,binding; GO:0046906,te…
Os01g0629500	1.4394	1.789	1.6142	1.0439	0.4623	0.3489	0.40875	0.4554	0.3621	0.7399	0.1559	0.3054	18	23	20.5	14	9	6	6.5	8	5	15	3	6	-1.3827	0.0223801	0.0772126	false	-1.95329	0.000439743	0.00158219	down	-1.94701	0.00351176	0.0126174	down	1	25140681	25141680	+	Os01g0629500	Conserved hypothetical protein	--	--	--	--	A0A5S6R9Z9_ORYSJ SubName: Full=Os01g0806300 protein {ECO:0000313|EMBL:BAF06482.2};	--	--
Os01g0629600	4.471	6.4444	5.4577	1.9707	2.2714	3.2808	1.48995	1.7652	1.2147	2.9084	1.743	1.992	110	163	136.5	52	87	111	47	61	33	116	66	77	-1.09809	3.46248e-05	0.00034644	down	-1.81233	1.36719e-13	1.73882e-12	down	-1.24806	3.46847e-06	2.76027e-05	down	1	25144502	25145949	+	OsSCP4	Peptidase S10%2C serine carboxypeptidase family protein	K09645 vitellogenic carboxypeptidase-like protein [EC:3.4.16.-] | (RefSeq) serine carboxypeptidase-like 50 (A)	--	--	SCP50_ARATH RecName: Full=Serine carboxypeptidase-like 50; EC=3.4.16.-; Flags: Precursor;	A0A0P0V5I5_ORYSJ RecName: Full=Carboxypeptidase {ECO:0000256|RuleBase:RU361156}; EC=3.4.16.- {ECO:0000256|RuleBase:RU361156};	At1g15000	GO:0005576,extracellular region; GO:0005773,vacuole; GO:0004185,serine-type carboxypeptidase activity; GO:0003674,molecular_function; GO:0003824,catalytic activity; GO:0004180,carboxypeptidase activity; GO:0008233,peptidase activity; GO:0008236,serine-type peptidase activity; GO:0008238,exopeptidase activity; GO:0016787,hydrolase activity; GO:0017171,serine hydrolase activity; GO:0070008,serine-t…
Os01g0631200	7.1236	6.9704	7.047	2.3327	3.6225	5.7969	2.07295	2.6867	1.4592	3.0342	2.6173	2.4829	168	169	168.5	59	133	188	63.5	89	38	116	95	92	-0.8234	0.00417955	0.0206915	false	-1.69132	4.22412e-14	5.55947e-13	down	-1.32375	1.72883e-11	3.57773e-10	down	1	25234709	25238165	+	Os01g0631200	Similar to siroheme uroporphyrinogen methyltransferase1	K02303 uroporphyrin-III C-methyltransferase [EC:2.1.1.107] | (RefSeq) uroporphyrinogen-III C-methyltransferase (A)	ko00860: Porphyrin metabolism; ko01100: Metabolic pathways; ko01110: Biosynthesis of secondary metabolites; ko01240: Biosynthesis of cofactors	--	UPM1_ARATH RecName: Full=S-adenosyl-L-methionine-dependent uroporphyrinogen III methyltransferase, chloroplastic {ECO:0000303|PubMed:29472934, ECO:0000303|PubMed:9006913}; Short=Urophorphyrin III methylase {ECO:0000303|PubMed:29472934, ECO:0000303|PubMed:9006913}; EC=2.1.1.107 {ECO:0000269|PubMed:9006913}; AltName: Full=Urophorphyrin methylase 1 {ECO:0000303|PubMed:29472934, ECO:0000303|PubMed:90…	Q0JL19_ORYSJ SubName: Full=Os01g0631200 protein {ECO:0000313|EMBL:BAS73296.1}; Flags: Fragment;	At5g40850	GO:0009507,chloroplast; GO:0004851,uroporphyrin-III C-methyltransferase activity; GO:0032259,methylation; GO:1902326,positive regulation of chlorophyll biosynthetic process; GO:0090352,regulation of nitrate assimilation; GO:1900058,regulation of sulfate assimilation; GO:0009416,response to light stimulus; GO:0019354,siroheme biosynthetic process; GO:0003674,molecular_function; GO:0003824,catalyti…
Os01g0631400	7.588	11.6711	9.62955	18.1304	18.1562	21.4165	21.6986	24.7151	18.682	19.6885	18.4266	22.7292	160	253	206.5	410	596	621	583.5	732	435	673	598	753	1.01828	1.17179e-08	2.44207e-07	up	1.22266	3.68499e-13	4.5198e-12	up	1.13081	1.03683e-09	1.62483e-08	up	1	25257001	25263141	+	GPAT	Six-hairpin glycosidase domain containing protein	K13508 glycerol-3-phosphate acyltransferase [EC:2.3.1.15 2.3.1.198] | (RefSeq) glycerol-3-phosphate acyltransferase 1 (A)	ko00561: Glycerolipid metabolism; ko00564: Glycerophospholipid metabolism; ko01100: Metabolic pathways; ko01110: Biosynthesis of secondary metabolites	--	GPAT1_ARATH RecName: Full=Glycerol-3-phosphate acyltransferase 1; Short=AtGPAT1; EC=2.3.1.15;	A0A0P0V5K6_ORYSJ SubName: Full=Os01g0631400 protein {ECO:0000313|EMBL:BAF05560.1}; Flags: Fragment;	At1g06520	GO:0016021,integral component of membrane; GO:0016020,membrane; GO:0005739,mitochondrion; GO:0090447,glycerol-3-phosphate 2-O-acyltransferase activity; GO:0004366,glycerol-3-phosphate O-acyltransferase activity; GO:0016791,phosphatase activity; GO:0102420,sn-1-glycerol-3-phosphate C16:0-DCA-CoA acyl transferase activity; GO:0016024,CDP-diacylglycerol biosynthetic process; GO:0010143,cutin biosynt…
Os01g0631500	0.7847	0.7184	0.75155	0.6887	0.682	0.8056	0.93925	0.6244	1.2541	1.3383	1.2297	1.7334	17	16	16.5	16	23	24	24.5	19	30	47	41	59	-0.0157484	0.974434	0.988121	false	0.34288	0.455346	0.57671	false	1.00307	0.0175915	0.0486423	up	1	25271701	25273506	+	Os01g0631500	Similar to Beta-1%2C3-glucanase-like protein	K19892 glucan endo-1,3-beta-glucosidase 4 [EC:3.2.1.39] | (RefSeq) glucan endo-1,3-beta-glucosidase 1 (A)	ko00500: Starch and sucrose metabolism; ko01100: Metabolic pathways	--	PDCB2_ARATH RecName: Full=PLASMODESMATA CALLOSE-BINDING PROTEIN 2; Short=AtPDCB2; AltName: Full=Glucan endo-1,3-beta-glucosidase-like protein 3; Flags: Precursor;	Q8RZK0_ORYSJ SubName: Full=Os01g0631500 protein {ECO:0000313|EMBL:BAS73299.1}; SubName: Full=cDNA clone:001-113-F12, full insert sequence {ECO:0000313|EMBL:BAG88642.1};	At1g29380	GO:0031225,anchored component of membrane; GO:0046658,anchored component of plasma membrane; GO:0009506,plasmodesma; GO:0001872,(1->3)-beta-D-glucan binding; GO:0030247,polysaccharide binding; GO:0009408,response to heat; GO:0003674,molecular_function; GO:0005488,binding; GO:0030246,carbohydrate binding; GO:0006950,response to stress; GO:0008150,biological_process; GO:0009266,response to temperat…
Os01g0631800	2.1513	2.0179	2.0846	1.5045	0.4935	0.7822	0.1864	0.1641	0.2087	0.5214	0.8487	0.6357	28	27	27.5	21	10	14	3	3	3	11	17	13	-1.18493	0.0241818	0.0820316	false	-3.46776	4.77736e-08	3.34787e-07	down	-1.59708	0.000893187	0.00388437	down	1	25288392	25289157	+	Os01g0631800	Conserved hypothetical protein	--	--	--	--	Q8RZJ7_ORYSJ SubName: Full=Os01g0631800 protein {ECO:0000313|EMBL:BAS73302.1}; SubName: Full=cDNA clone:J023019C22, full insert sequence {ECO:0000313|EMBL:BAG91425.1};	--	GO:0016021,integral component of membrane; GO:0005575,cellular_component; GO:0016020,membrane; GO:0031224,intrinsic component of membrane; GO:0110165,cellular anatomical entity
Os01g0635200	18.9667	14.7593	16.863	33.1195	19.124	9.3622	50.2546	45.3381	55.1712	19.1453	20.763	19.8272	165	132	148.5	309	259	112	542	554	530	270	278	271	0.310451	0.385309	0.582324	false	1.61493	5.09275e-25	1.34356e-23	up	0.295577	0.103111	0.198739	false	1	25462003	25463635	+	Os01g0635200	Homeodomain-like containing protein	--	--	--	RADL2_ARATH RecName: Full=Protein RADIALIS-like 2; Short=AtRL2; Short=Protein RAD-like 2; AltName: Full=Protein MATERNAL EFFECT EMBRYO ARREST 3; AltName: Full=Protein RADIALIS-LIKE SANT/MYB 1; Short=Protein RSM1;	Q0JL02_ORYSJ SubName: Full=Os01g0635200 protein {ECO:0000313|EMBL:BAS73327.1}; SubName: Full=cDNA clone:001-108-G06, full insert sequence {ECO:0000313|EMBL:BAG99527.1};	At2g21650	GO:0005634,nucleus; GO:0003700,DNA-binding transcription factor activity; GO:0009793,embryo development ending in seed dormancy; GO:0009630,gravitropism; GO:0010114,response to red light; GO:0003674,molecular_function; GO:0140110,transcription regulator activity; GO:0000003,reproduction; GO:0003006,developmental process involved in reproduction; GO:0007275,multicellular organism development; GO:0…
Os01g0636400	9.0752	12.5422	10.8087	10.9336	7.5321	12.1861	8.05325	6.7489	9.3576	44.3422	22.2433	13.2967	202	287	244.5	261	261	373	220.5	211	230	1600	762	465	-0.0624898	0.771079	0.877663	false	-0.392965	0.0328469	0.0691627	false	1.34334	0.00700342	0.0226169	up	1	25501902	25504409	-	Os01g0636400	Alpha/beta hydrolase family protein	--	--	--	LPAAT_ARATH RecName: Full=1-acylglycerol-3-phosphate O-acyltransferase; EC=2.3.1.51; AltName: Full=Lipid droplet-binding protein CGI-58 homolog;	Q5VNP5_ORYSJ SubName: Full=Os01g0636400 protein {ECO:0000313|EMBL:BAS73337.1}; SubName: Full=cDNA, clone: J065021L21, full insert sequence {ECO:0000313|EMBL:BAH00883.1};	At4g36610	GO:0005737,cytoplasm; GO:0003841,1-acylglycerol-3-phosphate O-acyltransferase activity; GO:0052689,carboxylic ester hydrolase activity; GO:0016298,lipase activity; GO:0042171,lysophosphatidic acid acyltransferase activity; GO:0004623,phospholipase A2 activity; GO:0071456,cellular response to hypoxia; GO:0055089,fatty acid homeostasis; GO:0055088,lipid homeostasis; GO:0006654,phosphatidic acid bio…
Os01g0638000	27.7656	42.5963	35.181	0.2896	0.8379	3.862	0.66625	0.995	0.3375	3.1995	0.6659	0.9686	894	1410	1152	10	42	171	28.5	45	12	167	33	49	-4.39251	6.06917e-06	7.35313e-05	down	-5.65249	1.41274e-43	8.23288e-42	down	-4.4075	4.86832e-11	9.38255e-10	down	1	25598451	25600345	+	Os01g0638000	UDP-glucuronosyl/UDP-glucosyltransferase family protein	K22771 flavonol-3-O-L-rhamnoside-7-O-glucosyltransferase [EC:2.4.1.-] | (RefSeq) UDP-glycosyltransferase 73C6 (A)	ko00944: Flavone and flavonol biosynthesis	--	ANGT_GENTR RecName: Full=Anthocyanin 3'-O-beta-glucosyltransferase; Short=3'GT; EC=2.4.1.238;	Q94CZ1_ORYSJ RecName: Full=Glycosyltransferase {ECO:0000256|RuleBase:RU362057}; EC=2.4.1.- {ECO:0000256|RuleBase:RU362057};	At2g15480	GO:0033837,anthocyanin 3'-O-beta-glucosyltransferase activity; GO:0008194,UDP-glycosyltransferase activity; GO:0003674,molecular_function; GO:0003824,catalytic activity; GO:0016740,transferase activity; GO:0016757,transferase activity, transferring glycosyl groups; GO:0016758,transferase activity, transferring hexosyl groups; GO:0046527,glucosyltransferase activity
Os01g0639200	17.2462	17.3552	17.3007	27.8147	23.2594	29.9003	37.631	31.5193	43.7427	30.5535	35.5523	49.9087	492	509	500.5	851	1033	1173	1320.5	1263	1378	1413	1561	2237	0.661811	4.04991e-07	6.39427e-06	false	1.15655	5.13225e-17	8.64365e-16	up	1.21998	6.57308e-11	1.24426e-09	up	1	25640719	25647590	-	SNL6	Cinnamoyl-CoA reductase-like gene family member%2C Defense respons	K09753 cinnamoyl-CoA reductase [EC:1.2.1.44] | (RefSeq) cinnamoyl-CoA reductase 1 (A)	ko00940: Phenylpropanoid biosynthesis; ko01100: Metabolic pathways; ko01110: Biosynthesis of secondary metabolites	--	SNL6_ORYSJ RecName: Full=Cinnamoyl-CoA reductase-like SNL6 {ECO:0000305}; EC=1.2.-.- {ECO:0000305}; AltName: Full=Protein SUPPRESSOR OF NH1-MEDIATED LESION 6 {ECO:0000303|PubMed:20862311};	A0A0E0MZT6_ORYRU RecName: Full=3Beta_HSD domain-containing protein {ECO:0000259|Pfam:PF01073};	At5g14700	GO:0003854,3-beta-hydroxy-delta5-steroid dehydrogenase activity; GO:0016616,oxidoreductase activity, acting on the CH-OH group of donors, NAD or NADP as acceptor; GO:0042742,defense response to bacterium; GO:0009809,lignin biosynthetic process; GO:0006694,steroid biosynthetic process; GO:0003674,molecular_function; GO:0003824,catalytic activity; GO:0016229,steroid dehydrogenase activity; GO:00164…
Os01g0639600	46.7828	60.8816	53.8322	14.9087	17.0591	26.3681	14.6922	12.3887	16.9958	16.1856	11.1878	10.9015	1027	1374	1200.5	351	583	796	397	382	412	576	378	376	-1.45013	5.74676e-14	2.52113e-12	down	-1.84012	4.61591e-36	2.04417e-34	down	-2.02634	2.49056e-33	3.29218e-31	down	1	25681571	25682862	+	Os01g0639600	Protein of unknown function DUF1645 family protein	--	--	--	--	Q94CX7_ORYSJ SubName: Full=Os01g0639600 protein {ECO:0000313|EMBL:BAS73358.1}; SubName: Full=cDNA clone:J013088M21, full insert sequence {ECO:0000313|EMBL:BAG90244.1};	At5g62770	--
Os01g0641800	5.9544	4.4146	5.1845	1.7604	1.2827	2.9043	2.1599	1.5251	2.7947	2.4413	2.0759	1.6638	164	125	144.5	52	55	110	72	59	85	109	88	72	-1.36727	7.92645e-06	9.35137e-05	down	-1.24147	1.16536e-06	6.69795e-06	down	-1.27831	1.19797e-07	1.29345e-06	down	1	25788671	25790988	+	Os01g0641800	Similar to Carbonic anhydrase	K08900 mitochondrial chaperone BCS1 | (RefSeq) AAA-ATPase At3g50940 (A)	--	--	AATPC_ARATH RecName: Full=AAA-ATPase At3g50940; EC=3.6.1.- {ECO:0000250|UniProtKB:Q9FLD5}; Flags: Precursor;	A0A0P0V5Q6_ORYSJ SubName: Full=Os01g0641800 protein {ECO:0000313|EMBL:BAS73371.1};	At3g50940	GO:0005524,ATP binding; GO:0016887,ATPase activity; GO:0016787,hydrolase activity; GO:0009651,response to salt stress; GO:0000166,nucleotide binding; GO:0003674,molecular_function; GO:0005488,binding; GO:0017076,purine nucleotide binding; GO:0030554,adenyl nucleotide binding; GO:0032553,ribonucleotide binding; GO:0032555,purine ribonucleotide binding; GO:0032559,adenyl ribonucleotide binding; GO:…
Os01g0642000	9.3112	7.6985	8.50485	1.0491	1.7445	7.1378	1.0895	1.1601	1.0189	1.3641	0.9831	0.7655	240	204	222	29	70	253	35.5	42	29	57	39	31	-1.3489	0.08794	0.214444	false	-2.90843	8.35077e-41	4.40616e-39	down	-2.9829	5.0101e-33	6.40554e-31	down	1	25792699	25797614	+	Os01g0642000	Carboxylesterase%2C type B family protein	K15889 prenylcysteine alpha-carboxyl methylesterase [EC:3.1.1.-] | (RefSeq) probable isoprenylcysteine alpha-carbonyl methylesterase ICMEL2 isoform X1 (A)	ko00900: Terpenoid backbone biosynthesis; ko01100: Metabolic pathways; ko01110: Biosynthesis of secondary metabolites	--	IMCL2_ORYSJ RecName: Full=Probable isoprenylcysteine alpha-carbonyl methylesterase ICMEL2; EC=3.1.1.n2; AltName: Full=Isoprenylcysteine methylesterase-like protein 2;	B9EYA5_ORYSJ RecName: Full=Abhydrolase_3 domain-containing protein {ECO:0000259|Pfam:PF07859};	At1g26120	GO:0005789,endoplasmic reticulum membrane; GO:0000139,Golgi membrane; GO:0016021,integral component of membrane; GO:0016787,hydrolase activity; GO:0010296,prenylcysteine methylesterase activity; GO:0003674,molecular_function; GO:0003824,catalytic activity; GO:0016788,hydrolase activity, acting on ester bonds; GO:0051723,protein methylesterase activity; GO:0052689,carboxylic ester hydrolase activi…
Os01g0642100	21.4573	15.9023	18.6798	2.9535	2.4941	12.4086	1.67605	1.9641	1.388	2.8994	3.9169	1.1706	210	160	185	31	38	167	21	27	15	46	59	18	-1.63549	0.0245649	0.0830419	false	-3.41514	5.70893e-37	2.67486e-35	down	-2.76382	3.09702e-15	1.02781e-13	down	1	25798769	25800398	+	Os01g0642100	Hypothetical conserved gene	K15889 prenylcysteine alpha-carboxyl methylesterase [EC:3.1.1.-] | (RefSeq) probable isoprenylcysteine alpha-carbonyl methylesterase ICMEL2 isoform X1 (A)	ko00900: Terpenoid backbone biosynthesis; ko01100: Metabolic pathways; ko01110: Biosynthesis of secondary metabolites	--	IMCE_ORYSJ RecName: Full=Probable isoprenylcysteine alpha-carbonyl methylesterase ICME; EC=3.1.1.n2;	A0A0P0V5R8_ORYSJ SubName: Full=Os01g0642100 protein {ECO:0000313|EMBL:BAS73373.1}; Flags: Fragment;	--	GO:0005789,endoplasmic reticulum membrane; GO:0000139,Golgi membrane; GO:0016021,integral component of membrane; GO:0016787,hydrolase activity; GO:0010296,prenylcysteine methylesterase activity; GO:0003674,molecular_function; GO:0003824,catalytic activity; GO:0016788,hydrolase activity, acting on ester bonds; GO:0051723,protein methylesterase activity; GO:0052689,carboxylic ester hydrolase activi…
Os01g0642700	3.3902	5.3203	4.35525	0.843	1.7131	1.3477	1.2153	1.4482	0.9824	1.5336	1.028	0.9494	75	121	98	20	59	41	34.5	45	24	55	35	33	-1.70783	2.29528e-07	3.77696e-06	down	-1.7889	3.38811e-10	3.10052e-09	down	-1.84443	5.39342e-09	7.45362e-08	down	1	25836151	25838904	+	Os01g0642700	S-locus glycoprotein domain containing protein	--	--	--	Y2913_ARATH RecName: Full=G-type lectin S-receptor-like serine/threonine-protein kinase At2g19130; EC=2.7.11.1; Flags: Precursor;	A0A0D3ERR0_9ORYZ RecName: Full=Receptor-like serine/threonine-protein kinase {ECO:0000256|PIRNR:PIRNR000641}; EC=2.7.11.1 {ECO:0000256|PIRNR:PIRNR000641};	At2g19130	GO:0016021,integral component of membrane; GO:0005886,plasma membrane; GO:0005524,ATP binding; GO:0005516,calmodulin binding; GO:0030246,carbohydrate binding; GO:0106310,protein serine kinase activity; GO:0004674,protein serine/threonine kinase activity; GO:0106311,protein threonine kinase activity; GO:0048544,recognition of pollen; GO:0000166,nucleotide binding; GO:0003674,molecular_function; GO…
Os01g0642801	6.924	10.1026	8.5133	4.0889	2.3721	4.1959	3.2107	3.2863	3.1351	3.417	2.6993	2.7911	30	45	37.5	19	16	25	17.5	20	15	24	18	19	-1.26066	0.00359307	0.0183724	down	-1.35641	0.000376149	0.00137495	down	-1.47338	0.000338598	0.00165921	down	1	25839729	25839983	+	Os01g0642801	Similar to S-domain class receptor-like kinase3	--	--	--	Y2913_ARATH RecName: Full=G-type lectin S-receptor-like serine/threonine-protein kinase At2g19130; EC=2.7.11.1; Flags: Precursor;	A0A0P0V5S9_ORYSJ SubName: Full=Os01g0642801 protein {ECO:0000313|EMBL:BAS73378.1};	At2g19130	GO:0016021,integral component of membrane; GO:0005886,plasma membrane; GO:0005524,ATP binding; GO:0005516,calmodulin binding; GO:0030246,carbohydrate binding; GO:0106310,protein serine kinase activity; GO:0004674,protein serine/threonine kinase activity; GO:0106311,protein threonine kinase activity; GO:0048544,recognition of pollen; GO:0000166,nucleotide binding; GO:0003674,molecular_function; GO…
Os01g0647200	4.939	6.3637	5.65135	0	0.9302	2.3881	0.5445	0.1289	0.9601	0.0638	0.1008	1.3661	191	253	222	0	56	127	24	7	41	4	6	83	-2.34472	0.139491	0.297575	false	-3.37341	2.88458e-06	1.55456e-05	down	-3.38805	0.00596016	0.0197521	down	1	26086062	26088337	-	Os01g0647200	Hypothetical conserved gene	--	--	--	--	A6MZQ3_ORYSI SubName: Full=Uncharacterized protein {ECO:0000313|EMBL:ABR25473.1};	--	--
Os01g0648000	0.7641	1.098	0.93105	0.3239	0.9259	0.4925	0.38485	0.408	0.3617	0.8463	0.3949	0.3758	44	65	54.5	20	83	39	28	33	23	79	35	34	-0.644373	0.117315	0.263412	false	-1.22334	0.000112461	0.000460036	down	-0.736389	0.064929	0.138747	false	1	26119741	26126165	-	OsAKT1	Potassium channel%2C Potassium uptake%2C Salt stress toleranc	K21867 potassium channel | (RefSeq) potassium channel AKT1 (A)	--	--	AKT1_ORYSJ RecName: Full=Potassium channel AKT1; Short=OsAKT1;	I1NQ49_ORYGL SubName: Full=Uncharacterized protein {ECO:0000313|EnsemblPlants:ORGLA01G0198900.1};	At2g26650	GO:0016021,integral component of membrane; GO:0005249,voltage-gated potassium channel activity; GO:0034765,regulation of ion transmembrane transport; GO:0003674,molecular_function; GO:0005215,transporter activity; GO:0005216,ion channel activity; GO:0005244,voltage-gated ion channel activity; GO:0005261,cation channel activity; GO:0005267,potassium channel activity; GO:0008324,cation transmembran…
Os01g0649400	0.3847	0.5145	0.4496	0.4035	0.8648	0.4546	0.97055	0.5477	1.3934	1.0085	0.906	2.0199	8	11	9.5	9	28	13	24	16	32	34	29	66	NA	NA	NA	NA	1.09602	0.0443145	0.0889517	false	1.57978	0.00464112	0.0159478	up	1	26202814	26206936	+	OsGELP19	Similar to Esterase	--	--	--	GDL9_ARATH RecName: Full=GDSL esterase/lipase At1g28600; EC=3.1.1.-; AltName: Full=Extracellular lipase At1g28600; Flags: Precursor;	A0A0P0V5Y6_ORYSJ SubName: Full=Os01g0649400 protein {ECO:0000313|EMBL:BAS73430.1}; Flags: Fragment;	At1g28600	GO:0005618,cell wall; GO:0005576,extracellular region; GO:0016788,hydrolase activity, acting on ester bonds; GO:0016042,lipid catabolic process; GO:0003674,molecular_function; GO:0003824,catalytic activity; GO:0016787,hydrolase activity; GO:0006629,lipid metabolic process; GO:0008150,biological_process; GO:0008152,metabolic process; GO:0009056,catabolic process; GO:0044238,primary metabolic proce…
Os01g0649900	8.7391	10.3538	9.54645	14.2504	12.5307	21.595	21.7396	19.137	24.3421	20.3115	20.2367	29.4456	211	257	234	369	471	717	649	649	649	795	752	1117	0.774832	0.000206605	0.00164377	false	1.22302	1.8386e-17	3.18351e-16	up	1.34703	2.06464e-12	4.84031e-11	up	1	26222617	26225117	+	OsGELP20	Lipase%2C GDSL domain containing protein	--	--	--	GDL9_ARATH RecName: Full=GDSL esterase/lipase At1g28600; EC=3.1.1.-; AltName: Full=Extracellular lipase At1g28600; Flags: Precursor;	A2ZW08_ORYSJ SubName: Full=Lipase-like {ECO:0000313|EMBL:BAB89190.1}; SubName: Full=Os01g0649900 protein {ECO:0000313|EMBL:BAF05635.1};	At1g28600	GO:0005618,cell wall; GO:0005576,extracellular region; GO:0016788,hydrolase activity, acting on ester bonds; GO:0016042,lipid catabolic process; GO:0003674,molecular_function; GO:0003824,catalytic activity; GO:0016787,hydrolase activity; GO:0006629,lipid metabolic process; GO:0008150,biological_process; GO:0008152,metabolic process; GO:0009056,catabolic process; GO:0044238,primary metabolic proce…
Os01g0650100	18.3567	12.687	15.5219	21.921	22.9623	32.9624	31.576	29.1759	33.9762	26.3225	29.7653	45.7097	228	162	195	292	444	563	487.5	509	466	530	569	892	0.761802	0.000278307	0.00211984	false	1.0642	6.36862e-11	6.30324e-10	up	1.1881	1.12557e-06	9.96028e-06	up	1	26235768	26238284	+	Os01g0650100	Similar to Esterase	--	--	--	GDL9_ARATH RecName: Full=GDSL esterase/lipase At1g28600; EC=3.1.1.-; AltName: Full=Extracellular lipase At1g28600; Flags: Precursor;	B7E951_ORYSJ SubName: Full=Uncharacterized protein {ECO:0000313|EMBL:BAD68798.1};	At1g28600	GO:0005618,cell wall; GO:0005576,extracellular region; GO:0016788,hydrolase activity, acting on ester bonds; GO:0016042,lipid catabolic process; GO:0003674,molecular_function; GO:0003824,catalytic activity; GO:0016787,hydrolase activity; GO:0006629,lipid metabolic process; GO:0008150,biological_process; GO:0008152,metabolic process; GO:0009056,catabolic process; GO:0044238,primary metabolic proce…
Os01g0651350	2.1749	1.4745	1.8247	2.7039	1.6934	1.7733	3.5863	3.4722	3.7004	2.1954	2.6121	4.3626	33	23	28	44	40	37	68	74	62	54	61	104	0.186398	0.645074	0.79497	false	1.01636	0.000788778	0.00268977	up	0.80521	0.048722	0.11089	false	1	26306408	26309172	-	Os01g0651350	Hypothetical protein	--	--	--	GDL9_ARATH RecName: Full=GDSL esterase/lipase At1g28600; EC=3.1.1.-; AltName: Full=Extracellular lipase At1g28600; Flags: Precursor;	A2WT97_ORYSI SubName: Full=Uncharacterized protein {ECO:0000313|EMBL:EAY75193.1};	At1g28600	GO:0005618,cell wall; GO:0005576,extracellular region; GO:0016788,hydrolase activity, acting on ester bonds; GO:0016042,lipid catabolic process; GO:0003674,molecular_function; GO:0003824,catalytic activity; GO:0016787,hydrolase activity; GO:0006629,lipid metabolic process; GO:0008150,biological_process; GO:0008152,metabolic process; GO:0009056,catabolic process; GO:0044238,primary metabolic proce…
Os01g0651400	1.6141	1.2078	1.41095	1.1578	1.7148	1.4447	3.59125	3.9779	3.2046	2.2212	2.5009	6.4803	26	20	23	20	43	32	73.5	90	57	58	62	164	0.0573397	0.893244	0.946	false	1.40263	6.0117e-06	3.07704e-05	up	1.46984	0.00255347	0.00964074	up	1	26309253	26311638	+	Os01g0651400	Lipase%2C GDSL domain containing protein	--	--	--	GDL9_ARATH RecName: Full=GDSL esterase/lipase At1g28600; EC=3.1.1.-; AltName: Full=Extracellular lipase At1g28600; Flags: Precursor;	A0A0P0V5Z2_ORYSJ SubName: Full=Os01g0651400 protein {ECO:0000313|EMBL:BAH91214.1}; Flags: Fragment;	At1g28600	GO:0005618,cell wall; GO:0005576,extracellular region; GO:0016788,hydrolase activity, acting on ester bonds; GO:0016042,lipid catabolic process; GO:0003674,molecular_function; GO:0003824,catalytic activity; GO:0016787,hydrolase activity; GO:0006629,lipid metabolic process; GO:0008150,biological_process; GO:0008152,metabolic process; GO:0009056,catabolic process; GO:0044238,primary metabolic proce…
Os01g0652300	2.8303	4.2916	3.56095	8.8487	3.7965	2.8452	5.4726	6.0451	4.9001	6.3162	10.8716	4.9275	34	53	43.5	114	71	47	83.5	102	65	123	201	93	0.54801	0.2105	0.391888	false	0.665799	0.0128716	0.0313292	false	1.09455	0.00229322	0.00878431	up	1	26383595	26387037	-	Os01g0652300	Similar to Phospholipase A1-II 7	K16818 phospholipase A1 [EC:3.1.1.32] | (RefSeq) phospholipase A(1) DAD1, chloroplastic-like (A)	ko00564: Glycerophospholipid metabolism; ko00592: alpha-Linolenic acid metabolism; ko01100: Metabolic pathways; ko01110: Biosynthesis of secondary metabolites	--	PLA4_ORYSJ RecName: Full=Phospholipase A1-II 4; EC=3.1.1.-;	C7IWC5_ORYSJ RecName: Full=Phospholipase A1 {ECO:0000256|RuleBase:RU367093}; EC=3.1.1.- {ECO:0000256|RuleBase:RU367093}; Flags: Fragment;	At4g18550	GO:0005737,cytoplasm; GO:0008970,phospholipase A1 activity; GO:0016042,lipid catabolic process; GO:0003674,molecular_function; GO:0003824,catalytic activity; GO:0004620,phospholipase activity; GO:0016298,lipase activity; GO:0016787,hydrolase activity; GO:0016788,hydrolase activity, acting on ester bonds; GO:0052689,carboxylic ester hydrolase activity; GO:0006629,lipid metabolic process; GO:000815…
Os01g0652375	5.368	7.9028	6.6354	20.3818	12.3635	6.8928	11.0458	11.8438	10.2478	13.7823	22.8747	11.9119	111	168	139.5	452	398	196	289	344	234	462	728	387	1.01582	0.00190675	0.010856	up	0.779481	5.89884e-06	3.02191e-05	false	1.33689	3.30654e-07	3.25876e-06	up	1	26383821	26387010	+	Os01g0652375	Hypothetical protein	K16818 phospholipase A1 [EC:3.1.1.32] | (RefSeq) phospholipase A(1) DAD1, chloroplastic-like (A)	ko00564: Glycerophospholipid metabolism; ko00592: alpha-Linolenic acid metabolism; ko01100: Metabolic pathways; ko01110: Biosynthesis of secondary metabolites	--	PLA4_ORYSJ RecName: Full=Phospholipase A1-II 4; EC=3.1.1.-;	A0A0E0N025_ORYRU RecName: Full=Phospholipase A1 {ECO:0000256|RuleBase:RU367093}; EC=3.1.1.- {ECO:0000256|RuleBase:RU367093};	At4g18550	GO:0005737,cytoplasm; GO:0008970,phospholipase A1 activity; GO:0016042,lipid catabolic process; GO:0003674,molecular_function; GO:0003824,catalytic activity; GO:0004620,phospholipase activity; GO:0016298,lipase activity; GO:0016787,hydrolase activity; GO:0016788,hydrolase activity, acting on ester bonds; GO:0052689,carboxylic ester hydrolase activity; GO:0006629,lipid metabolic process; GO:000815…
Os01g0654100	40.5015	28.8696	34.6855	3.464	4.4095	16.4146	2.09225	2.4292	1.7553	3.1012	2.3219	2.0432	2006	1470	1738	184	340	1118	132.5	169	96	249	177	159	-2.08617	0.0027427	0.0146924	down	-3.99734	3.49337e-138	1.48798e-135	down	-3.75035	8.19905e-98	1.74394e-94	down	1	26514543	26521761	+	Os01g0654100	Similar to CTP synthase (EC 6.3.4.2) (UTP--ammonia ligase) (CTP synthetase)	K01937 CTP synthase [EC:6.3.4.2] | (RefSeq) CTP synthase (A)	ko00240: Pyrimidine metabolism; ko01100: Metabolic pathways; ko01232: Nucleotide metabolism; ko01240: Biosynthesis of cofactors	--	--	Q5VPD3_ORYSJ RecName: Full=CTP synthase {ECO:0000256|RuleBase:RU810713}; EC=6.3.4.2 {ECO:0000256|RuleBase:RU810713}; AltName: Full=UTP--ammonia ligase {ECO:0000256|RuleBase:RU810713};	At3g12670	GO:0005524,ATP binding; GO:0003883,CTP synthase activity; GO:0042802,identical protein binding; GO:0044210,'de novo' CTP biosynthetic process; GO:0006241,CTP biosynthetic process; GO:0006541,glutamine metabolic process; GO:0019856,pyrimidine nucleobase biosynthetic process; GO:0000166,nucleotide binding; GO:0003674,molecular_function; GO:0005488,binding; GO:0017076,purine nucleotide binding; GO:0…
Os01g0654150	0.6146	0.9846	0.7996	0.1011	0.0697	0.6835	0.0386	0.0772	0	0.1338	0.047	0.023	17	28	22.5	3	3	26	1.5	3	0	6	2	1	-1.45914	0.0612296	0.164847	false	-4.02868	1.02121e-06	5.92382e-06	down	-3.49006	4.81603e-06	3.71883e-05	down	1	26514730	26520699	-	Os01g0654150	Non-protein coding transcript	K01937 CTP synthase [EC:6.3.4.2] | (RefSeq) CTP synthase (A)	ko00240: Pyrimidine metabolism; ko01100: Metabolic pathways; ko01232: Nucleotide metabolism; ko01240: Biosynthesis of cofactors	--	--	Q5VPD3_ORYSJ RecName: Full=CTP synthase {ECO:0000256|RuleBase:RU810713}; EC=6.3.4.2 {ECO:0000256|RuleBase:RU810713}; AltName: Full=UTP--ammonia ligase {ECO:0000256|RuleBase:RU810713};	At1g30820	GO:0005524,ATP binding; GO:0003883,CTP synthase activity; GO:0042802,identical protein binding; GO:0044210,'de novo' CTP biosynthetic process; GO:0006241,CTP biosynthetic process; GO:0006541,glutamine metabolic process; GO:0019856,pyrimidine nucleobase biosynthetic process; GO:0000166,nucleotide binding; GO:0003674,molecular_function; GO:0005488,binding; GO:0017076,purine nucleotide binding; GO:0…
Os01g0656400	17.4066	15.7519	16.5792	4.9889	8.2484	4.8245	3.79905	4.3679	3.2302	6.1169	6.2111	5.1308	244	227	235.5	75	180	93	68	86	50	139	134	113	-1.43395	8.86467e-10	2.21456e-08	down	-2.06921	6.45155e-29	2.07042e-27	down	-1.45907	2.48101e-16	9.40815e-15	down	1	26687377	26688416	-	OsWRKY15	Similar to WRKY transcription factor 15	K18835 WRKY transcription factor 2 | (RefSeq) probable WRKY transcription factor 2 (A)	ko04626: Plant-pathogen interaction	--	WRK19_ORYSJ RecName: Full=Transcription factor WRKY19 {ECO:0000305}; Short=OsWRKY19 {ECO:0000303|PubMed:15047897}; AltName: Full=WRKY transcription factor 19 {ECO:0000305};	Q6B6R3_ORYSI SubName: Full=Transcription factor WRKY98 {ECO:0000313|EMBL:AAT84157.1};	At4g23810	GO:0005634,nucleus; GO:0003700,DNA-binding transcription factor activity; GO:0000976,transcription regulatory region sequence-specific DNA binding; GO:0006952,defense response; GO:0003674,molecular_function; GO:0140110,transcription regulator activity; GO:0001067,regulatory region nucleic acid binding; GO:0003676,nucleic acid binding; GO:0003677,DNA binding; GO:0003690,double-stranded DNA binding…
Os01g0660200	61.7589	61.6483	61.7036	16.8274	25.7233	23.7884	11.8454	8.8141	14.8767	42.3267	26.7307	12.9108	1297	1331	1314	379	841	687	302.5	260	345	1441	864	426	-1.45835	7.43092e-23	6.81401e-21	down	-2.35473	8.07376e-46	5.04384e-44	down	-1.13312	0.0126811	0.037227	down	1	26885484	26886719	+	C10728	Acidic class III chitinase OsChib3a precursor (Chitinase) (EC 3.2.1.14)	K01183 chitinase [EC:3.2.1.14] | (RefSeq) acidic endochitinase (A)	ko00520: Amino sugar and nucleotide sugar metabolism; ko01100: Metabolic pathways	--	CHIT3_VITVI RecName: Full=Acidic endochitinase; EC=3.2.1.14; Flags: Precursor;	A0A0E0N091_ORYRU RecName: Full=Glyco_hydro_18 domain-containing protein {ECO:0000259|Pfam:PF00704};	At5g24090	GO:0004568,chitinase activity; GO:0006032,chitin catabolic process; GO:0000272,polysaccharide catabolic process; GO:0003674,molecular_function; GO:0003824,catalytic activity; GO:0004553,hydrolase activity, hydrolyzing O-glycosyl compounds; GO:0016787,hydrolase activity; GO:0016798,hydrolase activity, acting on glycosyl bonds; GO:0006022,aminoglycan metabolic process; GO:0006026,aminoglycan catabo…
Os01g0660300	122.192	138.799	130.496	27.1348	32.6474	53.172	28.2323	28.524	27.9406	24.6393	21.3179	22.8803	2998	3501	3249.5	714	1247	1794	870	983	757	980	805	882	-1.7757	9.77048e-20	6.98664e-18	down	-2.16567	3.89763e-148	1.79039e-145	down	-2.45443	7.65872e-140	5.97304e-136	down	1	26888425	26895926	-	Os01g0660300	Similar to Pyruvate kinase	K00873 pyruvate kinase [EC:2.7.1.40] | (RefSeq) plastidial pyruvate kinase 2 (A)	ko00010: Glycolysis / Gluconeogenesis; ko00620: Pyruvate metabolism; ko01100: Metabolic pathways; ko01110: Biosynthesis of secondary metabolites; ko01200: Carbon metabolism; ko01230: Biosynthesis of amino acids	--	PKP2_ARATH RecName: Full=Plastidial pyruvate kinase 2; Short=PKp2; EC=2.7.1.40; AltName: Full=Plastidial pyruvate kinase 1; Short=PKP1; AltName: Full=Pyruvate kinase III; AltName: Full=Pyruvate kinase isozyme B1, chloroplastic; Short=PKP-BETA1; Short=Plastidic pyruvate kinase beta subunit 1; Flags: Precursor;	Q0JKP1_ORYSJ RecName: Full=Pyruvate kinase {ECO:0000256|ARBA:ARBA00012142, ECO:0000256|RuleBase:RU000504}; EC=2.7.1.40 {ECO:0000256|ARBA:ARBA00012142, ECO:0000256|RuleBase:RU000504}; Flags: Fragment;	At5g52920	GO:0009507,chloroplast; GO:0009570,chloroplast stroma; GO:0005737,cytoplasm; GO:0005739,mitochondrion; GO:0005524,ATP binding; GO:0016301,kinase activity; GO:0000287,magnesium ion binding; GO:0030955,potassium ion binding; GO:0004743,pyruvate kinase activity; GO:0006633,fatty acid biosynthetic process; GO:0006096,glycolytic process; GO:0006629,lipid metabolic process; GO:0046686,response to cadmi…
Os01g0663300	1.6704	2.731	2.2007	0.1657	0.0685	0.3101	0.2012	0.1771	0.2253	0.4385	0.2078	0.3619	47	79	63	5	3	12	7	7	7	20	9	16	-3.599	3.51419e-12	1.21917e-10	down	-3.42693	9.6245e-15	1.3413e-13	down	-2.65552	2.54124e-10	4.388e-09	down	1	27081819	27085661	+	Os01g0663300	Similar to (1-4)-beta-mannan endohydrolase-like protein	K19355 mannan endo-1,4-beta-mannosidase [EC:3.2.1.78] | (RefSeq) mannan endo-1,4-beta-mannosidase 1 (A)	ko00051: Fructose and mannose metabolism; ko01100: Metabolic pathways	--	MAN1_ORYSJ RecName: Full=Mannan endo-1,4-beta-mannosidase 1; EC=3.2.1.78; AltName: Full=Beta-mannanase 1; AltName: Full=Endo-beta-1,4-mannanase 1; AltName: Full=OsMAN1; Flags: Precursor;	A0A0D9YCS9_9ORYZ RecName: Full=Mannan endo-1,4-beta-mannosidase {ECO:0000256|ARBA:ARBA00012706}; EC=3.2.1.78 {ECO:0000256|ARBA:ARBA00012706};	At5g66460	GO:0005576,extracellular region; GO:0016985,mannan endo-1,4-beta-mannosidase activity; GO:0005975,carbohydrate metabolic process; GO:0003674,molecular_function; GO:0003824,catalytic activity; GO:0004553,hydrolase activity, hydrolyzing O-glycosyl compounds; GO:0004567,beta-mannosidase activity; GO:0015923,mannosidase activity; GO:0016787,hydrolase activity; GO:0016798,hydrolase activity, acting on…
Os01g0663400	38.7869	48.8144	43.8006	14.9406	13.6972	15.8405	17.169	16.9698	17.3682	19.9575	16.7411	19.4025	1266	1638	1452	523	696	711	702	778	626	1056	841	995	-1.54353	8.21723e-36	1.92144e-33	down	-1.30951	2.17254e-34	9.02415e-33	down	-1.1741	5.13049e-21	3.08581e-19	down	1	27085767	27092237	-	OsAP10	Similar to Aspartic proteinase oryzasin 1 precursor (EC 3.4.23.-)	K08245 phytepsin [EC:3.4.23.40] | (RefSeq) aspartic proteinase oryzasin-1-like (A)	--	--	ASPR1_ORYSJ RecName: Full=Aspartic proteinase oryzasin-1; EC=3.4.23.-; Flags: Precursor;	A0A0N7KDG5_ORYSJ SubName: Full=Os01g0663400 protein {ECO:0000313|EMBL:BAF05700.1};	At1g11910	GO:0005773,vacuole; GO:0004190,aspartic-type endopeptidase activity; GO:0006629,lipid metabolic process; GO:0003674,molecular_function; GO:0003824,catalytic activity; GO:0004175,endopeptidase activity; GO:0008233,peptidase activity; GO:0016787,hydrolase activity; GO:0070001,aspartic-type peptidase activity; GO:0140096,catalytic activity, acting on a protein; GO:0008150,biological_process; GO:0008…
Os01g0667900	18.6935	16.8343	17.7639	10.6831	13.2473	11.752	8.48045	8.7151	8.2458	10.341	7.3659	8.7124	310	287	298.5	190	342	268	177	203	151	278	188	227	-0.55397	0.000357897	0.00262754	false	-1.02133	4.27638e-13	5.20701e-12	down	-0.958548	3.6329e-08	4.35e-07	false	1	27326050	27327025	-	GRX6	CC-type glutaredoxin%2C Homeostatic regulation of nitrogen use%2C Hormone signalin	K03676 glutaredoxin 3 | (RefSeq) glutaredoxin-C5 (A)	--	--	GRXS5_ORYSJ RecName: Full=Monothiol glutaredoxin-S5;	I1NQH8_ORYGL RecName: Full=Glutaredoxin domain-containing protein {ECO:0000259|PROSITE:PS51354};	At1g28480	GO:0005737,cytoplasm; GO:0005634,nucleus; GO:0051537,2 iron, 2 sulfur cluster binding; GO:0046872,metal ion binding; GO:0015035,protein disulfide oxidoreductase activity; GO:0003674,molecular_function; GO:0005488,binding; GO:0051536,iron-sulfur cluster binding; GO:0051540,metal cluster binding; GO:0043167,ion binding; GO:0043169,cation binding; GO:0003824,catalytic activity; GO:0015036,disulfide …
Os01g0669100	0.8195	0.7358	0.77765	0.2547	0.1485	0.2292	0.1883	0.2244	0.1522	0.2463	0.2321	0.3076	39	36	37.5	13	11	15	11.5	15	8	19	17	23	-1.88782	2.7445e-05	0.000283331	down	-1.96792	2.04566e-06	1.13001e-05	down	-1.52064	0.000179574	0.00095402	down	1	27417284	27420084	-	OsLSK1	S-domain receptor-like kinase%2C OsPR1b-interacting factor%2C Resistance protein%2C Grain yield%2C Disease resistanc	K13430 serine/threonine-protein kinase PBS1 [EC:2.7.11.1] | (RefSeq) serine/threonine-protein kinase PBS1 (A)	ko04626: Plant-pathogen interaction	--	KPRO_MAIZE RecName: Full=Putative receptor protein kinase ZmPK1; EC=2.7.11.1; Flags: Precursor;	Q8W054_ORYSJ RecName: Full=Receptor-like serine/threonine-protein kinase {ECO:0000256|PIRNR:PIRNR000641}; EC=2.7.11.1 {ECO:0000256|PIRNR:PIRNR000641};	At1g34300	GO:0016021,integral component of membrane; GO:0005524,ATP binding; GO:0106310,protein serine kinase activity; GO:0106311,protein threonine kinase activity; GO:0048544,recognition of pollen; GO:0000166,nucleotide binding; GO:0003674,molecular_function; GO:0005488,binding; GO:0017076,purine nucleotide binding; GO:0030554,adenyl nucleotide binding; GO:0032553,ribonucleotide binding; GO:0032555,purin…
Os01g0670100	4.3539	6.0228	5.18835	1.2036	1.1384	1.2251	0.7157	1.0748	0.3566	1.3901	1.6206	1.3647	199	283	241	59	81	77	43.5	69	18	103	114	98	-2.10788	2.04486e-23	2.00062e-21	down	-2.76745	8.48425e-23	2.02404e-21	down	-1.77816	2.04351e-18	9.58157e-17	down	1	27474092	27476781	-	Os01g0670100	Serine/threonine protein kinase-related domain containing protein	K13430 serine/threonine-protein kinase PBS1 [EC:2.7.11.1] | (RefSeq) serine/threonine-protein kinase PBS1 (A)	ko04626: Plant-pathogen interaction	--	KPRO_MAIZE RecName: Full=Putative receptor protein kinase ZmPK1; EC=2.7.11.1; Flags: Precursor;	A0A0P0V6B5_ORYSJ RecName: Full=Receptor-like serine/threonine-protein kinase {ECO:0000256|PIRNR:PIRNR000641}; EC=2.7.11.1 {ECO:0000256|PIRNR:PIRNR000641};	At1g34300	GO:0016021,integral component of membrane; GO:0005524,ATP binding; GO:0106310,protein serine kinase activity; GO:0106311,protein threonine kinase activity; GO:0048544,recognition of pollen; GO:0000166,nucleotide binding; GO:0003674,molecular_function; GO:0005488,binding; GO:0017076,purine nucleotide binding; GO:0030554,adenyl nucleotide binding; GO:0032553,ribonucleotide binding; GO:0032555,purin…
Os01g0670500	2.1072	2.1576	2.1324	0.6205	1.3061	1.4786	0.83725	1.1054	0.5691	1.1402	1.0809	1.2706	57	60	58.5	18	55	55	29.5	42	17	50	45	54	-0.873349	0.0161464	0.0598147	false	-1.26435	7.70297e-05	0.0003255	down	-0.814887	0.00576182	0.0191981	false	1	27491023	27492614	-	Os01g0670500	Conserved hypothetical protein	--	--	--	--	A0A0E0FQS4_ORYNI SubName: Full=Uncharacterized protein {ECO:0000313|EnsemblPlants:ONIVA01G29260.1};	At2g43340	--
Os01g0672100	2.5251	2.1161	2.3206	2.1734	1.7717	2.2035	3.26015	3.3189	3.2014	5.2481	4.1647	4.5001	65	56	60.5	60	71	78	105.5	120	91	219	165	182	-0.15811	0.57228	0.741858	false	0.540929	0.0152693	0.0361912	false	1.05614	4.74875e-06	3.67052e-05	up	1	27556027	27560681	-	ONAC073	No apical meristem (NAM) protein domain containing protein	--	--	--	NAC73_ARATH RecName: Full=NAC domain-containing protein 73 {ECO:0000303|PubMed:15029955}; Short=ANAC073 {ECO:0000303|PubMed:15029955}; AltName: Full=Protein SECONDARY WALL-ASSOCIATED NAC DOMAIN PROTEIN 2 {ECO:0000303|PubMed:18952777};	A0A0P0V6D3_ORYSJ SubName: Full=Os01g0672100 protein {ECO:0000313|EMBL:BAH91228.1};	At4g28500	GO:0005634,nucleus; GO:0003700,DNA-binding transcription factor activity; GO:0000976,transcription regulatory region sequence-specific DNA binding; GO:0045893,positive regulation of transcription, DNA-templated; GO:2000652,regulation of secondary cell wall biogenesis; GO:0006355,regulation of transcription, DNA-templated; GO:0003674,molecular_function; GO:0140110,transcription regulator activity;…
Os01g0672201	3.5733	6.0315	4.8024	2.8419	2.5316	3.4009	3.47685	4.5268	2.4269	3.3388	1.8778	1.2375	68	118	93	58	75	89	86	121	51	103	55	37	-0.698035	0.0141982	0.0540976	false	-0.404285	0.150181	0.243044	false	-1.11243	0.00333049	0.0120718	down	1	27582039	27585096	+	Os01g0672201	Homeobox domain containing protein	--	--	--	RLT2_ARATH RecName: Full=Homeobox-DDT domain protein RLT2 {ECO:0000305}; AltName: Full=Protein RINGLET 2 {ECO:0000303|PubMed:22694359};	D6BV21_ORYSJ SubName: Full=Homeobox protein {ECO:0000313|EMBL:ADB84632.1}; SubName: Full=Os01g0672201 protein {ECO:0000313|EMBL:BAS73618.1};	At5g44180	GO:0005634,nucleus; GO:0003700,DNA-binding transcription factor activity; GO:0000976,transcription regulatory region sequence-specific DNA binding; GO:0009908,flower development; GO:0045892,negative regulation of transcription, DNA-templated; GO:0006351,transcription, DNA-templated; GO:0010228,vegetative to reproductive phase transition of meristem; GO:0003674,molecular_function; GO:0140110,trans…
Os01g0678000	0.7621	0.8472	0.80465	0.4264	0.6434	0.57	0.17115	0.0465	0.2958	0.4701	0.2122	0.194	35	40	37.5	21	46	36	9	3	15	35	15	14	-0.53499	0.14647	0.307525	false	-2.27296	1.29015e-05	6.24598e-05	down	-1.41856	0.00217892	0.00840427	down	1	27875639	27878341	+	Os01g0678000	Protein of unknown function DUF2921 domain containing protein	--	--	--	--	A2ZWI3_ORYSJ SubName: Full=Os01g0678000 protein {ECO:0000313|EMBL:BAF05769.1};	At4g21700	GO:0016021,integral component of membrane; GO:0005575,cellular_component; GO:0016020,membrane; GO:0031224,intrinsic component of membrane; GO:0110165,cellular anatomical entity
Os01g0679550	1.114	1.2642	1.1891	0.1154	0	0	0.1281	0.0881	0.1681	0	0.1206	0	18	21	19.5	2	0	0	2.5	2	3	0	3	0	-5.20758	1.12916e-05	0.000127985	down	-3.32854	5.61346e-06	2.88898e-05	down	-4.87292	3.99495e-06	3.13657e-05	down	1	27960362	27961312	+	Os01g0679550	Similar to Aspartic proteinase nepenthesin-2	K22683 aspartyl protease family protein [EC:3.4.23.-] | (RefSeq) protein ASPARTIC PROTEASE IN GUARD CELL 1 (A)	--	--	NANA_ARATH RecName: Full=Aspartic proteinase NANA, chloroplast {ECO:0000303|PubMed:22987884}; EC=3.4.23.- {ECO:0000269|PubMed:22987884}; Flags: Precursor;	A0A0P0V6I6_ORYSJ SubName: Full=Chloroplast nucleoid DNA binding protein-like {ECO:0000313|EMBL:BAD73477.1};	At3g12700	GO:0009507,chloroplast; GO:0005576,extracellular region; GO:0004190,aspartic-type endopeptidase activity; GO:0005975,carbohydrate metabolic process; GO:0010019,chloroplast-nucleus signaling pathway; GO:0007623,circadian rhythm; GO:0009744,response to sucrose; GO:0003674,molecular_function; GO:0003824,catalytic activity; GO:0004175,endopeptidase activity; GO:0008233,peptidase activity; GO:0016787,…
Os01g0681200	19.356	21.7521	20.5541	4.7223	6.536	8.1729	3.4528	3.869	3.0366	4.6077	4.703	2.8113	837	967	902	219	440	486	190	235	145	323	313	191	-1.64455	4.35116e-21	3.46065e-19	down	-2.52049	9.95402e-95	1.86554e-92	down	-2.29725	6.66064e-37	1.11314e-34	down	1	28061734	28067159	-	Os01g0681200	Similar to Acyl-CoA synthetase (EC 6.2.1.3)	K01897 long-chain acyl-CoA synthetase [EC:6.2.1.3] | (RefSeq) long chain acyl-CoA synthetase 4 isoform X1 (A)	ko00061: Fatty acid biosynthesis; ko00071: Fatty acid degradation; ko01100: Metabolic pathways; ko01212: Fatty acid metabolism; ko04146: Peroxisome	--	LACS4_ARATH RecName: Full=Long chain acyl-CoA synthetase 4; EC=6.2.1.3;	A0A0P0V6M8_ORYSJ SubName: Full=Os01g0681200 protein {ECO:0000313|EMBL:BAF05793.1};	At4g23850	GO:0005783,endoplasmic reticulum; GO:0005794,Golgi apparatus; GO:0016020,membrane; GO:0005886,plasma membrane; GO:0005524,ATP binding; GO:0004467,long-chain fatty acid-CoA ligase activity; GO:0006631,fatty acid metabolic process; GO:0000166,nucleotide binding; GO:0003674,molecular_function; GO:0005488,binding; GO:0017076,purine nucleotide binding; GO:0030554,adenyl nucleotide binding; GO:0032553,…
Os01g0681800	23.3897	22.9157	23.1527	9.763	10.9564	9.9474	5.69535	4.5087	6.882	10.1571	10.04	6.0193	277	279	278	124	202	162	82.5	75	90	195	183	112	-1.15663	5.19054e-13	2.02284e-11	down	-2.00414	8.8067e-27	2.55024e-25	down	-1.35624	1.90029e-10	3.34042e-09	down	1	28088399	28089095	-	Os01g0681800	Conserved hypothetical protein	--	--	--	--	Q0JKD1_ORYSJ SubName: Full=Os01g0681800 protein {ECO:0000313|EMBL:BAF05797.1};	--	--
Os01g0681900	160.628	131.237	145.932	327.483	267.638	316.894	349.131	294.971	403.291	279.563	360.862	601.92	756	635	695.5	1653	1961	2051	2023	1950	2096	2133	2614	4451	1.07947	8.95989e-17	5.18587e-15	up	1.29423	3.82636e-20	7.7948e-19	up	1.5664	1.08723e-10	1.99669e-09	up	1	28091236	28091512	-	OsGLT1	Non-protein coding transcript	--	--	--	--	--	--	--
Os01g0684900	32.333	36.9602	34.6466	15.9544	15.5768	17.3553	11.6829	11.8247	11.5411	17.0334	12.1141	10.4774	1096	1288	1192	580	822	809	497.5	563	432	936	632	558	-1.0684	3.55047e-23	3.36116e-21	down	-1.52487	1.0311e-55	9.01325e-54	down	-1.34208	7.11131e-16	2.57559e-14	down	1	28235071	28238631	-	Os01g0684900	Multi antimicrobial extrusion protein MatE family protein	K03327 multidrug resistance protein, MATE family | (RefSeq) protein DETOXIFICATION 12 isoform X1 (A)	--	--	DTX10_ARATH RecName: Full=Protein DETOXIFICATION 10 {ECO:0000303|PubMed:11739388}; Short=AtDTX10 {ECO:0000303|PubMed:11739388}; AltName: Full=Multidrug and toxic compound extrusion protein 10 {ECO:0000305}; Short=MATE protein 10 {ECO:0000305};	Q5N7N1_ORYSJ RecName: Full=Protein DETOXIFICATION {ECO:0000256|RuleBase:RU004914}; AltName: Full=Multidrug and toxic compound extrusion protein {ECO:0000256|RuleBase:RU004914};	At1g15170	GO:0016021,integral component of membrane; GO:0016020,membrane; GO:0015297,antiporter activity; GO:0022857,transmembrane transporter activity; GO:0042910,xenobiotic transmembrane transporter activity; GO:0003674,molecular_function; GO:0005215,transporter activity; GO:0015291,secondary active transmembrane transporter activity; GO:0022804,active transmembrane transporter activity; GO:0005575,cellu…
Os01g0685400	3.6381	4.2808	3.95945	1.7508	1.9223	1.6641	1.2643	1.2533	1.2753	1.5927	1.4106	1.1951	62	75	68.5	32	51	39	27	30	24	44	37	32	-1.1289	0.000146322	0.00122413	down	-1.60323	3.98977e-08	2.82638e-07	down	-1.44489	1.97645e-06	1.65449e-05	down	1	28250506	28251508	+	Os01g0685400	Homeodomain-like domain containing protein	K09422 transcription factor MYB, plant | (RefSeq) myb-related protein Myb4-like (A)	--	--	MYB87_ARATH RecName: Full=Transcription factor MYB87 {ECO:0000305}; AltName: Full=Myb-related protein 87 {ECO:0000305}; Short=AtMYB87 {ECO:0000312|EMBL:CAB09241.1};	C7IWV3_ORYSJ SubName: Full=Os01g0685400 protein {ECO:0000313|EMBL:BAH91239.1}; Flags: Fragment;	At4g37780	GO:0005634,nucleus; GO:0003677,DNA binding; GO:0003700,DNA-binding transcription factor activity; GO:0007275,multicellular organism development; GO:0009664,plant-type cell wall organization; GO:0003674,molecular_function; GO:0003676,nucleic acid binding; GO:0005488,binding; GO:0097159,organic cyclic compound binding; GO:1901363,heterocyclic compound binding; GO:0140110,transcription regulator act…
Os01g0687400	7.3444	6.5647	6.95455	1.1105	2.5182	3.3921	1.73215	1.3072	2.1571	2.9999	1.9023	1.1686	148	136	142	24	79	94	42.5	37	48	98	59	37	-1.54217	2.51154e-06	3.33868e-05	down	-1.99421	2.24296e-16	3.60645e-15	down	-1.73368	4.10657e-08	4.86982e-07	down	1	28354882	28356067	-	Os01g0687400	Similar to Chitinase (EC 3.2.1.14)	K01183 chitinase [EC:3.2.1.14] | (RefSeq) acidic endochitinase (A)	ko00520: Amino sugar and nucleotide sugar metabolism; ko01100: Metabolic pathways	--	CHIA_CICAR RecName: Full=Acidic endochitinase; EC=3.2.1.14; Flags: Precursor;	Q0JKA2_ORYSJ SubName: Full=Os01g0687400 protein {ECO:0000313|EMBL:BAF05826.1}; SubName: Full=Putative chitinase {ECO:0000313|EMBL:BAB85356.1};	At5g24090	GO:0005615,extracellular space; GO:0004568,chitinase activity; GO:0006032,chitin catabolic process; GO:0000272,polysaccharide catabolic process; GO:0003674,molecular_function; GO:0003824,catalytic activity; GO:0004553,hydrolase activity, hydrolyzing O-glycosyl compounds; GO:0016787,hydrolase activity; GO:0016798,hydrolase activity, acting on glycosyl bonds; GO:0006022,aminoglycan metabolic proces…
Os01g0690600	1.4603	1.9842	1.72225	0.7997	1.1912	1.1462	0.7011	0.4786	0.9236	0.7007	0.4669	0.5459	63	88	75.5	37	80	68	36.5	29	44	49	31	37	-0.695774	0.01654	0.061008	false	-1.29267	3.08866e-05	0.000140665	down	-1.5425	7.90003e-07	7.24163e-06	down	1	28513039	28517678	+	Os01g0690600	Conserved hypothetical protein	K13418 somatic embryogenesis receptor kinase 1 [EC:2.7.10.1 2.7.11.1] | (RefSeq) somatic embryogenesis receptor kinase 2 isoform X1 (A)	--	--	PR5K_ARATH RecName: Full=PR5-like receptor kinase {ECO:0000303|PubMed:8637920}; EC=2.7.11.1 {ECO:0000269|PubMed:8637920}; Flags: Precursor;	A0A0E0N117_ORYRU RecName: Full=Protein kinase domain-containing protein {ECO:0000259|PROSITE:PS50011};	At1g66980_2	GO:0016021,integral component of membrane; GO:0009506,plasmodesma; GO:0005524,ATP binding; GO:0004672,protein kinase activity; GO:0106310,protein serine kinase activity; GO:0106311,protein threonine kinase activity; GO:0004675,transmembrane receptor protein serine/threonine kinase activity; GO:0009620,response to fungus; GO:0000166,nucleotide binding; GO:0003674,molecular_function; GO:0005488,bin…
Os01g0690800	8.5734	9.9775	9.27545	5.5061	5.5492	5.9482	3.88165	3.8616	3.9017	5.0188	4.661	3.7028	392	469	430.5	270	395	374	222.5	248	197	372	328	266	-0.690016	2.52786e-07	4.12483e-06	false	-1.216	2.48308e-21	5.43655e-20	down	-1.00439	5.86252e-11	1.1188e-09	down	1	28524105	28534387	+	Os01g0690800	Protein kinase%2C core domain containing protein	K13418 somatic embryogenesis receptor kinase 1 [EC:2.7.10.1 2.7.11.1] | (RefSeq) somatic embryogenesis receptor kinase 2 isoform X1 (A)	--	--	LRL21_ARATH RecName: Full=LEAF RUST 10 DISEASE-RESISTANCE LOCUS RECEPTOR-LIKE PROTEIN KINASE-like 2.1 {ECO:0000303|PubMed:12805585}; EC=2.7.11.1; AltName: Full=Probable receptor-like serine/threonine-protein kinase LRK10L-2.1 {ECO:0000305}; Flags: Precursor;	A0A5S6RCQ9_ORYSJ SubName: Full=Os01g0690800 protein {ECO:0000313|EMBL:BAF05843.2}; SubName: Full=Receptor serine/threonine kinase PR5K-like {ECO:0000313|EMBL:BAD82485.1};	At1g67000	GO:0016021,integral component of membrane; GO:0005524,ATP binding; GO:0030247,polysaccharide binding; GO:0106310,protein serine kinase activity; GO:0106311,protein threonine kinase activity; GO:0000166,nucleotide binding; GO:0003674,molecular_function; GO:0005488,binding; GO:0017076,purine nucleotide binding; GO:0030554,adenyl nucleotide binding; GO:0032553,ribonucleotide binding; GO:0032555,puri…
Os01g0691000	2.1429	3.5361	2.8395	1.0348	1.9173	2.0036	0.97675	0.8446	1.1089	1.7468	2.3123	1.0717	56	95	75.5	29	78	72	31.5	31	32	74	93	44	-0.757472	0.0245643	0.0830419	false	-1.50718	8.29592e-07	4.89296e-06	down	-0.68559	0.0499196	0.113099	false	1	28534821	28536497	+	Os01g0691000	Similar to Acidic endochitinase SE2 precursor (EC 3.2.1.14)	K01183 chitinase [EC:3.2.1.14] | (RefSeq) acidic endochitinase SE2 (A)	ko00520: Amino sugar and nucleotide sugar metabolism; ko01100: Metabolic pathways	--	CHIE_BETVU RecName: Full=Acidic endochitinase SE2; EC=3.2.1.14; Flags: Precursor;	Q5N7S3_ORYSJ SubName: Full=Uncharacterized protein P0034C09.11 {ECO:0000313|EMBL:BAD82486.1};	At5g24090	GO:0005615,extracellular space; GO:0004568,chitinase activity; GO:0006032,chitin catabolic process; GO:0000272,polysaccharide catabolic process; GO:0003674,molecular_function; GO:0003824,catalytic activity; GO:0004553,hydrolase activity, hydrolyzing O-glycosyl compounds; GO:0016787,hydrolase activity; GO:0016798,hydrolase activity, acting on glycosyl bonds; GO:0006022,aminoglycan metabolic proces…
Os01g0691050	7.3652	9.6391	8.50215	3.1216	6.2363	4.869	3.6587	3.8612	3.4562	3.9651	6.6126	3.4945	110	148	129	50	145	100	69	81	57	96	152	82	-0.813908	0.00310382	0.0162691	false	-1.17009	3.52453e-08	2.51735e-07	down	-0.806639	0.00474038	0.0162407	false	1	28536737	28537615	+	Os01g0691050	Protein kinase%2C catalytic domain domain containing protein	K13418 somatic embryogenesis receptor kinase 1 [EC:2.7.10.1 2.7.11.1] | (RefSeq) somatic embryogenesis receptor kinase 1 (A)	--	--	PR5K_ARATH RecName: Full=PR5-like receptor kinase {ECO:0000303|PubMed:8637920}; EC=2.7.11.1 {ECO:0000269|PubMed:8637920}; Flags: Precursor;	A0A0P0V6U7_ORYSJ SubName: Full=Os01g0691050 protein {ECO:0000313|EMBL:BAS73802.1};	At1g66980_2	GO:0016021,integral component of membrane; GO:0009506,plasmodesma; GO:0005524,ATP binding; GO:0004672,protein kinase activity; GO:0106310,protein serine kinase activity; GO:0106311,protein threonine kinase activity; GO:0004675,transmembrane receptor protein serine/threonine kinase activity; GO:0009620,response to fungus; GO:0000166,nucleotide binding; GO:0003674,molecular_function; GO:0005488,bin…
Os01g0692000	2.1923	1.2029	1.6976	3.3545	2.5998	2.4118	2.653	1.6408	3.6652	5.3053	3.6888	2.254	39	22	30.5	64	72	59	56.5	41	72	153	101	63	0.743338	0.0415414	0.123756	false	0.667957	0.0872642	0.156033	false	1.19817	0.00293303	0.010836	up	1	28566638	28567684	-	OsGSTU40	Similar to Glutathione S-transferase GSTU6	K00799 glutathione S-transferase [EC:2.5.1.18] | (RefSeq) probable glutathione S-transferase GSTU6 (A)	ko00480: Glutathione metabolism; ko01100: Metabolic pathways	--	GSTU6_ORYSJ RecName: Full=Probable glutathione S-transferase GSTU6; EC=2.5.1.18; AltName: Full=28 kDa cold-induced protein;	A0A0P0V6Z0_ORYSJ SubName: Full=Os01g0692000 protein {ECO:0000313|EMBL:BAS73812.1}; Flags: Fragment;	At1g59700	GO:0005737,cytoplasm; GO:0004364,glutathione transferase activity; GO:0006749,glutathione metabolic process; GO:0003674,molecular_function; GO:0003824,catalytic activity; GO:0016740,transferase activity; GO:0016765,transferase activity, transferring alkyl or aryl (other than methyl) groups; GO:0006518,peptide metabolic process; GO:0006575,cellular modified amino acid metabolic process; GO:0006790…
Os01g0692100	12.8178	17.6249	15.2213	3.1287	6.7247	5.9049	2.93545	3.44	2.4309	6.5821	4.2731	2.3492	191	270	230.5	50	156	121	56	72	40	159	98	55	-1.50571	1.31553e-08	2.71262e-07	down	-2.31478	5.88549e-28	1.78832e-26	down	-1.74326	2.92615e-08	3.56579e-07	down	1	28568839	28569792	-	OsGSTU39	Glutathione S-transferase%2C C-terminal-like domain containing protein	K00799 glutathione S-transferase [EC:2.5.1.18] | (RefSeq) probable glutathione S-transferase GSTU6 (A)	ko00480: Glutathione metabolism; ko01100: Metabolic pathways	--	GSTU6_ORYSJ RecName: Full=Probable glutathione S-transferase GSTU6; EC=2.5.1.18; AltName: Full=28 kDa cold-induced protein;	A0A5S6R7I5_ORYSJ SubName: Full=Os01g0692100 protein {ECO:0000313|EMBL:BAF05853.2};	At1g10360	GO:0005737,cytoplasm; GO:0004364,glutathione transferase activity; GO:0006749,glutathione metabolic process; GO:0003674,molecular_function; GO:0003824,catalytic activity; GO:0016740,transferase activity; GO:0016765,transferase activity, transferring alkyl or aryl (other than methyl) groups; GO:0006518,peptide metabolic process; GO:0006575,cellular modified amino acid metabolic process; GO:0006790…
Os01g0693300	13.0024	14.9597	13.981	3.4449	3.9553	3.2281	2.888	2.7934	2.9826	4.293	4.3171	4.0467	454	537	495.5	129	215	155	126	137	115	243	232	222	-1.95815	1.56886e-37	4.41984e-35	down	-2.23772	3.05477e-58	2.85116e-56	down	-1.67602	1.19204e-35	1.89729e-33	down	1	28605063	28608212	+	Os01g0693300	Similar to Lipid phosphate phosphatase 2 (EC 3.1.3.-) (AtLPP2) (Phosphatidic acid phosphatase 2) (AtPAP2) (Prenyl diphosphate phosphatase)	K18693 diacylglycerol diphosphate phosphatase / phosphatidate phosphatase [EC:3.1.3.81 3.1.3.4] | (RefSeq) lipid phosphate phosphatase 2 (A)	ko00561: Glycerolipid metabolism; ko00564: Glycerophospholipid metabolism; ko01110: Biosynthesis of secondary metabolites	--	LPP2_ARATH RecName: Full=Lipid phosphate phosphatase 2; Short=AtLPP2; EC=3.1.3.-; AltName: Full=Phosphatidic acid phosphatase 2; Short=AtPAP2; AltName: Full=Prenyl diphosphate phosphatase;	Q5N7Q9_ORYSJ SubName: Full=Acid phosphatase ACP2 {ECO:0000313|EMBL:ABN80230.1}; SubName: Full=Os01g0693300 protein {ECO:0000313|EMBL:BAS73823.1}; SubName: Full=cDNA clone:J033030N09, full insert sequence {ECO:0000313|EMBL:BAG94953.1};	At1g15080	GO:0005887,integral component of plasma membrane; GO:0005886,plasma membrane; GO:0003993,acid phosphatase activity; GO:0042577,lipid phosphatase activity; GO:0008195,phosphatidate phosphatase activity; GO:0006644,phospholipid metabolic process; GO:0003674,molecular_function; GO:0003824,catalytic activity; GO:0016787,hydrolase activity; GO:0016788,hydrolase activity, acting on ester bonds; GO:0016…
Os01g0694000	2.3874	2.2213	2.30435	0.9356	0.8668	1.4342	0.6515	0.739	0.564	1.1312	1.0791	0.969	69	66	67.5	29	39	57	24	30	18	53	48	44	-1.07803	0.00076935	0.00502085	down	-1.76964	4.69157e-09	3.76144e-08	down	-1.07137	0.000156702	0.000844003	down	1	28666309	28668105	+	Os01g0694000	Protein kinase%2C core domain containing protein	K13437 receptor kinase-like protein | (RefSeq) probable LRR receptor-like serine/threonine-protein kinase At3g47570 (A)	ko04626: Plant-pathogen interaction	--	XA21_ORYSI RecName: Full=Receptor kinase-like protein Xa21 {ECO:0000303|Ref.1}; EC=2.7.11.1 {ECO:0000255|PROSITE-ProRule:PRU00159, ECO:0000269|PubMed:11927577}; Contains: RecName: Full=Receptor kinase-like protein Xa21, processed {ECO:0000250|UniProtKB:Q2R2D5}; Flags: Precursor;	A0A0P0V6Z5_ORYSJ SubName: Full=Os01g0694000 protein {ECO:0000313|EMBL:BAF05863.1}; Flags: Fragment;	At3g47090	GO:0005789,endoplasmic reticulum membrane; GO:0016021,integral component of membrane; GO:0005634,nucleus; GO:0005886,plasma membrane; GO:0005524,ATP binding; GO:0106310,protein serine kinase activity; GO:0004674,protein serine/threonine kinase activity; GO:0106311,protein threonine kinase activity; GO:0006952,defense response; GO:0031349,positive regulation of defense response; GO:1900426,positiv…
Os01g0695800	56.2724	65.0401	60.6562	7.3458	7.3994	15.5499	4.55355	5.0903	4.0168	14.4976	10.3665	9.6071	850	1010	930	119	174	323	87.5	108	67	355	241	228	-2.56757	1.31481e-26	1.64407e-24	down	-3.67768	3.10217e-151	1.54627e-148	down	-2.34937	1.45102e-48	4.24368e-46	down	1	28786544	28787701	-	MDR4	Similar to MDR-like ABC transporter	K05658 ATP-binding cassette, subfamily B (MDR/TAP), member 1 [EC:7.6.2.2] | (RefSeq) ABC transporter B family member 11 (A)	ko02010: ABC transporters	--	AB9B_ARATH RecName: Full=ABC transporter B family member 9; Short=ABC transporter ABCB.9; Short=AtABCB9; AltName: Full=Multidrug resistance protein 9; AltName: Full=P-glycoprotein 9;	A0A0P0V6Y8_ORYSJ SubName: Full=Os01g0695800 protein {ECO:0000313|EMBL:BAF05877.1}; Flags: Fragment;	At3g62150	GO:0005829,cytosol; GO:0016021,integral component of membrane; GO:0005524,ATP binding; GO:0042626,ATPase-coupled transmembrane transporter activity; GO:0055085,transmembrane transport; GO:0000166,nucleotide binding; GO:0003674,molecular_function; GO:0005488,binding; GO:0017076,purine nucleotide binding; GO:0030554,adenyl nucleotide binding; GO:0032553,ribonucleotide binding; GO:0032555,purine rib…
Os01g0696701	1.011	1.5453	1.27815	1.212	1.2524	1.1553	0.42285	0.2571	0.5886	0.4455	0.3754	0.4596	14	22	18	18	27	22	7	5	9	10	8	10	-0.0641497	0.894057	0.946465	false	-1.59716	0.00610376	0.0165069	down	-1.52858	0.00864473	0.0269645	down	1	28825757	28828085	-	Os01g0696701	Hypothetical protein	K05658 ATP-binding cassette, subfamily B (MDR/TAP), member 1 [EC:7.6.2.2] | (RefSeq) ABC transporter B family member 9 (A)	ko02010: ABC transporters	--	AB5B_ARATH RecName: Full=ABC transporter B family member 5; Short=ABC transporter ABCB.5; Short=AtABCB5; AltName: Full=P-glycoprotein 5; AltName: Full=Putative multidrug resistance protein 5;	A0A0P0V719_ORYSJ SubName: Full=Os01g0696600 protein {ECO:0000313|EMBL:BAF05881.1};	At4g01830	GO:0005829,cytosol; GO:0016021,integral component of membrane; GO:0005524,ATP binding; GO:0042626,ATPase-coupled transmembrane transporter activity; GO:0055085,transmembrane transport; GO:0000166,nucleotide binding; GO:0003674,molecular_function; GO:0005488,binding; GO:0017076,purine nucleotide binding; GO:0030554,adenyl nucleotide binding; GO:0032553,ribonucleotide binding; GO:0032555,purine rib…
Os01g0696800	25.1977	24.0568	24.6273	1.5374	4.3745	5.8125	2.1082	2.3987	1.8177	6.8984	3.4467	2.327	703	690	696.5	46	190	223	75	94	56	312	148	102	-2.63874	1.80211e-07	3.03156e-06	down	-3.48771	3.29199e-124	1.10174e-121	down	-2.49931	1.35492e-17	5.76381e-16	down	1	28835243	28836884	+	Os01g0696800	Peptidase A1 domain containing protein	K22683 aspartyl protease family protein [EC:3.4.23.-] | (RefSeq) protein ASPARTIC PROTEASE IN GUARD CELL 1 (A)	--	--	NEP1_NEPGR RecName: Full=Aspartic proteinase nepenthesin-1; EC=3.4.23.12; AltName: Full=Nepenthesin-I; Flags: Precursor;	A0A0P0V6X4_ORYSJ RecName: Full=Peptidase A1 domain-containing protein {ECO:0000259|PROSITE:PS51767};	At2g03200	GO:0005576,extracellular region; GO:0004190,aspartic-type endopeptidase activity; GO:0003674,molecular_function; GO:0003824,catalytic activity; GO:0004175,endopeptidase activity; GO:0008233,peptidase activity; GO:0016787,hydrolase activity; GO:0070001,aspartic-type peptidase activity; GO:0140096,catalytic activity, acting on a protein; GO:0005575,cellular_component; GO:0110165,cellular anatomical…
Os01g0699100	0.6608	1.607	1.1339	2.8113	2.4142	2.0723	2.3209	2.3229	2.3189	2.1401	2.6298	1.3932	16	40	28	73	91	69	70.5	79	62	84	98	53	1.11731	0.00316889	0.0165842	up	1.06952	0.00149277	0.00473755	up	0.905771	0.0310314	0.0772139	false	1	28921498	28922922	+	Os01g0699100	Serine/threonine protein kinase domain containing protein	K20716 mitogen-activated protein kinase kinase kinase 17/18 | (RefSeq) mitogen-activated protein kinase kinase kinase ANP1 (A)	ko04016: MAPK signaling pathway - plant	--	M3K17_ARATH RecName: Full=Mitogen-activated protein kinase kinase kinase 17 {ECO:0000303|PubMed:25720833}; EC=2.7.11.25 {ECO:0000250|UniProtKB:Q9ZVP5, ECO:0000255|PROSITE-ProRule:PRU00159};	A0A0P0V6Z8_ORYSJ SubName: Full=Os01g0699100 protein {ECO:0000313|EMBL:BAF05891.1}; Flags: Fragment;	At4g26890	GO:0005634,nucleus; GO:0005524,ATP binding; GO:0004709,MAP kinase kinase kinase activity; GO:0019901,protein kinase binding; GO:0106310,protein serine kinase activity; GO:0004674,protein serine/threonine kinase activity; GO:0106311,protein threonine kinase activity; GO:0009738,abscisic acid-activated signaling pathway; GO:0009737,response to abscisic acid; GO:0006970,response to osmotic stress; G…
Os01g0699600	1.2075	1.218	1.21275	1.9599	6.4636	3.4148	3.56795	3.6934	3.4425	0.8	1.6272	1.0532	27	28	27.5	47	225	105	100.5	116	85	29	56	37	1.71682	5.03591e-05	0.000479652	up	1.59049	3.09778e-09	2.5304e-08	up	-0.0191429	0.964066	0.977986	false	1	28946730	28948045	-	OsNPK1-PK	Serine/threonine protein kinase domain containing protein	K20716 mitogen-activated protein kinase kinase kinase 17/18 | (RefSeq) mitogen-activated protein kinase kinase kinase ANP1 (A)	ko04016: MAPK signaling pathway - plant	--	M3K17_ARATH RecName: Full=Mitogen-activated protein kinase kinase kinase 17 {ECO:0000303|PubMed:25720833}; EC=2.7.11.25 {ECO:0000250|UniProtKB:Q9ZVP5, ECO:0000255|PROSITE-ProRule:PRU00159};	A0A0P0V752_ORYSJ SubName: Full=Os01g0699600 protein {ECO:0000313|EMBL:BAF05894.1}; Flags: Fragment;	At2g32510	GO:0005634,nucleus; GO:0005524,ATP binding; GO:0004709,MAP kinase kinase kinase activity; GO:0019901,protein kinase binding; GO:0106310,protein serine kinase activity; GO:0004674,protein serine/threonine kinase activity; GO:0106311,protein threonine kinase activity; GO:0009738,abscisic acid-activated signaling pathway; GO:0009737,response to abscisic acid; GO:0006970,response to osmotic stress; G…
Os01g0700100	41.2488	30.6475	35.9481	46.031	43.2477	53.498	61.7951	59.3115	64.2786	100.809	105.028	90.4839	813	621	717	973	1327	1450	1520.5	1642	1399	3221	3186	2802	0.425354	0.00296194	0.0156588	false	0.822452	3.93041e-11	3.96716e-10	false	1.51074	2.20421e-30	2.35488e-28	up	1	28975565	28977344	+	OsSWEET2b	MtN3 and saliva related transmembrane protein family protein	K15382 solute carrier family 50 (sugar transporter) | (RefSeq) bidirectional sugar transporter SWEET2b (A)	--	--	SWT2B_ORYSI RecName: Full=Bidirectional sugar transporter SWEET2b; Short=OsSWEET2b;	A0A0D3ESX7_9ORYZ RecName: Full=Bidirectional sugar transporter SWEET {ECO:0000256|RuleBase:RU910715};	At3g14770	GO:0005887,integral component of plasma membrane; GO:0042802,identical protein binding; GO:0051119,sugar transmembrane transporter activity; GO:0003674,molecular_function; GO:0005488,binding; GO:0005515,protein binding; GO:0005215,transporter activity; GO:0008509,anion transmembrane transporter activity; GO:0015075,ion transmembrane transporter activity; GO:0015144,carbohydrate transmembrane tran…
Os01g0702700	11.9809	10.8594	11.4201	17.954	19.1899	22.5165	21.4063	21.7121	21.1006	22.9397	20.1688	24.7336	308	287	297.5	495	768	796	691.5	784	599	956	798	999	0.820255	3.72646e-09	8.50106e-08	false	0.949633	9.02693e-18	1.58764e-16	false	1.03965	8.99693e-14	2.51796e-12	up	1	29132173	29133909	-	OsMYB14	Similar to Transcription factor MYB86 (Myb-related protein 86) (AtMYB86) (Myb homolog 4) (AtMyb4)	K09422 transcription factor MYB, plant | (RefSeq) myb-related protein Hv33 (A)	--	--	MYB3_HORVU RecName: Full=Myb-related protein Hv33;	B9EZ15_ORYSJ SubName: Full=Os01g0702700 protein {ECO:0000313|EMBL:BAF05910.1};	At5g26655	GO:0005634,nucleus; GO:0003677,DNA binding; GO:0003674,molecular_function; GO:0003676,nucleic acid binding; GO:0005488,binding; GO:0097159,organic cyclic compound binding; GO:1901363,heterocyclic compound binding; GO:0005575,cellular_component; GO:0005622,intracellular anatomical structure; GO:0043226,organelle; GO:0043227,membrane-bounded organelle; GO:0043229,intracellular organelle; GO:0043231…
Os01g0703400	74.3632	73.6232	73.9932	141.685	198.505	113.679	131.308	131.774	130.843	117.501	142.222	107.766	1683	1713	1698	3439	6994	3538	3729.5	4189	3270	4311	4954	3832	1.0528	9.40377e-10	2.33924e-08	up	0.870421	5.09784e-35	2.1714e-33	false	0.779947	3.26423e-11	6.4833e-10	false	1	29158306	29162547	+	OsFPPS1	Similar to Farnesyl pyrophosphate synthetase (FPP synthetase) (FPS) (Farnesyl diphosphate synthetase) [Includes: Dimethylallyltranstransferase (EC 2.5.1.1)%3B Geranyltranstransferase (EC 2.5.1.10)]	K00787 farnesyl diphosphate synthase [EC:2.5.1.1 2.5.1.10] | (RefSeq) farnesyl pyrophosphate synthase (A)	ko00900: Terpenoid backbone biosynthesis; ko01100: Metabolic pathways; ko01110: Biosynthesis of secondary metabolites	--	FPPS_MAIZE RecName: Full=Farnesyl pyrophosphate synthase; Short=FPP synthase; Short=FPS; EC=2.5.1.10; AltName: Full=(2E,6E)-farnesyl diphosphate synthase; AltName: Full=Dimethylallyltranstransferase; EC=2.5.1.1; AltName: Full=Farnesyl diphosphate synthase; AltName: Full=Geranyltranstransferase;	Q7F5K4_ORYSJ SubName: Full=Os01g0703400 protein {ECO:0000313|EMBL:BAF05914.1}; SubName: Full=Putative farnesyl pyrophosphate synthetase {ECO:0000313|EMBL:BAB92292.2};	At5g47770	GO:0005737,cytoplasm; GO:0004161,dimethylallyltranstransferase activity; GO:0004337,geranyltranstransferase activity; GO:0046872,metal ion binding; GO:0006695,cholesterol biosynthetic process; GO:0045337,farnesyl diphosphate biosynthetic process; GO:0033384,geranyl diphosphate biosynthetic process; GO:0003674,molecular_function; GO:0003824,catalytic activity; GO:0004659,prenyltransferase activity…
Os01g0704100	16.9767	20.1617	18.5692	1.6829	3.2968	6.1521	2.0126	2.0077	2.0175	3.3748	3.6829	2.7641	602	735	668.5	64	182	300	89.5	100	79	194	201	154	-2.30738	4.23942e-06	5.33532e-05	down	-3.16177	8.95761e-106	2.20895e-103	down	-2.45165	7.69174e-60	3.5287e-57	down	1	29188850	29190936	+	NRT2.3	Nitrate transporter%2C Nitrate transpor	K02575 MFS transporter, NNP family, nitrate/nitrite transporter | (RefSeq) high-affinity nitrate transporter 2.3 (A)	ko00910: Nitrogen metabolism	--	NRT23_ORYSJ RecName: Full=High-affinity nitrate transporter 2.3; Short=OsNRT2.3;	A0A0E0FRU6_ORYNI SubName: Full=Uncharacterized protein {ECO:0000313|EnsemblPlants:ONIVA01G31910.1};	At1g12940	GO:0016021,integral component of membrane; GO:0009705,plant-type vacuole membrane; GO:0005886,plasma membrane; GO:0015112,nitrate transmembrane transporter activity; GO:0071249,cellular response to nitrate; GO:0042128,nitrate assimilation; GO:0015706,nitrate transport; GO:0003674,molecular_function; GO:0005215,transporter activity; GO:0008509,anion transmembrane transporter activity; GO:0015075,i…
Os01g0705200	2.5156	5.1216	3.8186	1.2001	1.1274	2.7228	0.6416	0.5415	0.7417	0.9383	0.9123	0.7447	43	90	66.5	22	30	64	13.5	13	14	26	24	20	-1.15929	0.00664141	0.029773	down	-2.52853	1.58153e-10	1.50245e-09	down	-2.08671	7.97866e-08	8.95127e-07	down	1	29233040	29234256	-	OsLEA14	Late embryogenesis abundant protein repeat containing protein	--	--	--	LEA14_ORYSJ RecName: Full=Late embryogenesis abundant protein 14 {ECO:0000303|Ref.9}; Short=OsLEA14 {ECO:0000303|Ref.9}; AltName: Full=Protein WATER STRESS-INDUCED 18 {ECO:0000303|PubMed:7948880};	A0A0D3ET11_9ORYZ SubName: Full=Uncharacterized protein {ECO:0000313|EnsemblPlants:OBART01G28020.1};	--	GO:0005634,nucleus; GO:0005575,cellular_component; GO:0005622,intracellular anatomical structure; GO:0043226,organelle; GO:0043227,membrane-bounded organelle; GO:0043229,intracellular organelle; GO:0043231,intracellular membrane-bounded organelle; GO:0110165,cellular anatomical entity
Os01g0705700	0.4164	0.2025	0.30945	1.1369	1.3945	1.0164	1.45565	1.3762	1.5351	0.3669	0.8309	0.6057	14	7	10.5	41	73	47	61	65	57	20	43	32	1.98388	2.11823e-05	0.000225652	up	2.29985	9.98572e-09	7.65496e-08	up	1.03863	0.0751722	0.156033	false	1	29271158	29273175	+	OsICE1	Similar to Transcription factor ICE1 (Inducer of CBF expression 1) (Basic helix- loop-helix protein 116) (bHLH116) (AtbHLH116)	K13422 transcription factor MYC2 | (RefSeq) transcription factor MYC2 (A)	ko04016: MAPK signaling pathway - plant; ko04075: Plant hormone signal transduction	--	MTB2_SOLLC RecName: Full=Transcription factor MTB2 {ECO:0000303|PubMed:30610166}; AltName: Full=Basic helix-loop-helix protein 133 {ECO:0000303|PubMed:25612924}; AltName: Full=Protein MYC2-TARGETED BHLH 2 {ECO:0000303|PubMed:30610166}; AltName: Full=Transcription factor bHLH133 {ECO:0000303|PubMed:25612924}; AltName: Full=bHLH transcription factor bHLH133 {ECO:0000305};	Q5NAC5_ORYSJ SubName: Full=BHLH protein-like {ECO:0000313|EMBL:BAD81581.1}; SubName: Full=Os01g0705700 protein {ECO:0000313|EMBL:BAF05926.1};	At2g46510	GO:0005634,nucleus; GO:0003700,DNA-binding transcription factor activity; GO:0046983,protein dimerization activity; GO:0000976,transcription regulatory region sequence-specific DNA binding; GO:0006952,defense response; GO:0031347,regulation of defense response; GO:2000022,regulation of jasmonic acid mediated signaling pathway; GO:0006355,regulation of transcription, DNA-templated; GO:0003674,mole…
Os01g0706200	0.6142	0.4326	0.5234	0.0987	0.0816	0.3234	0.0603	0.1206	0	0.0523	0.0275	0.0809	29	21	25	5	6	21	4	8	0	4	2	6	-1.61683	0.00938601	0.0390244	down	-2.95949	7.94619e-06	3.98023e-05	down	-3.23017	1.19638e-06	1.05074e-05	down	1	29290139	29295684	+	Os01g0706200	Cullin%2C N-terminal domain containing protein	K03347 cullin 1 | (RefSeq) cullin-1 (A)	ko04120: Ubiquitin mediated proteolysis; ko04141: Protein processing in endoplasmic reticulum	--	CUL1_ARATH RecName: Full=Cullin-1;	A0A0D9YDU2_9ORYZ RecName: Full=CULLIN_2 domain-containing protein {ECO:0000259|PROSITE:PS50069};	At1g43140	GO:0000794,condensed nuclear chromosome; GO:0031461,cullin-RING ubiquitin ligase complex; GO:0005737,cytoplasm; GO:0005829,cytosol; GO:0005634,nucleus; GO:0009524,phragmoplast; GO:0005819,spindle; GO:0031625,ubiquitin protein ligase binding; GO:0004842,ubiquitin-protein transferase activity; GO:0009734,auxin-activated signaling pathway; GO:0007049,cell cycle; GO:0009793,embryo development ending …
Os01g0706800	1.5315	2.0572	1.79435	5.9842	3.654	1.8032	5.1527	4.3614	5.944	3.2391	4.4068	5.1988	21	29	25	88	78	34	87	84	90	72	93	112	1.1061	0.0171446	0.0626296	false	1.55223	2.95595e-07	1.86254e-06	up	1.31122	0.000244689	0.00125109	up	1	29323176	29323982	-	Os01g0706800	Similar to agglutinin	--	--	--	JAL19_ARATH RecName: Full=Jacalin-related lectin 19;	A0A0P0V7D7_ORYSJ SubName: Full=Os01g0706800 protein {ECO:0000313|EMBL:BAS73947.1}; Flags: Fragment;	At1g73040	GO:0030246,carbohydrate binding; GO:0003674,molecular_function; GO:0005488,binding
Os01g0706850	7.1273	3.2563	5.1918	7.854	7.6304	9.345	10.2607	9.7641	10.7573	11.6576	14.8749	12.9218	66	31	48.5	78	110	119	118.5	127	110	175	212	188	0.700214	0.0309596	0.0990216	false	1.02738	0.000290541	0.00108991	up	1.4015	4.39144e-06	3.4226e-05	up	1	29326816	29327360	+	Os01g0706850	Non-protein coding transcript	--	--	--	APEP3_ORYSJ RecName: Full=Arabinogalactan peptide 3; Short=OsAGPEP3; Flags: Precursor;	A0A0E0N1F7_ORYRU SubName: Full=Uncharacterized protein {ECO:0000313|EnsemblPlants:ORUFI01G31310.1};	--	GO:0032578,aleurone grain membrane; GO:0031225,anchored component of membrane; GO:0005773,vacuole; GO:0005575,cellular_component; GO:0005622,intracellular anatomical structure; GO:0005737,cytoplasm; GO:0012506,vesicle membrane; GO:0016020,membrane; GO:0030659,cytoplasmic vesicle membrane; GO:0031090,organelle membrane; GO:0031410,cytoplasmic vesicle; GO:0031982,vesicle; GO:0033095,aleurone grain;…
Os01g0708500	19.0379	15.419	17.2284	6.2667	8.7891	13.4938	4.8919	5.3949	4.3889	4.757	4.8365	3.7493	711	592	651.5	251	511	693	232	283	181	288	278	220	-0.837759	0.000219005	0.00172773	false	-1.76634	1.18698e-38	5.82965e-37	down	-1.9025	5.59501e-35	8.39144e-33	down	1	29437301	29439863	-	LOGL1	Similar to lysine decarboxylase-like protein	K22522 cytokinin riboside 5'-monophosphate phosphoribohydrolase [EC:3.2.2.-] | (RefSeq) probable cytokinin riboside 5'-monophosphate phosphoribohydrolase LOGL1 (A)	--	--	LOGL1_ORYSJ RecName: Full=Probable cytokinin riboside 5'-monophosphate phosphoribohydrolase LOGL1; EC=3.2.2.n1; AltName: Full=Protein LONELY GUY-like 1;	A0A0D3ET46_9ORYZ RecName: Full=Cytokinin riboside 5'-monophosphate phosphoribohydrolase {ECO:0000256|ARBA:ARBA00012205, ECO:0000256|RuleBase:RU363015}; EC=3.2.2.n1 {ECO:0000256|ARBA:ARBA00012205, ECO:0000256|RuleBase:RU363015};	At2g37210	GO:0005829,cytosol; GO:0005634,nucleus; GO:0016799,hydrolase activity, hydrolyzing N-glycosyl compounds; GO:0102682,N6-(Delta2-isopentenyl)-adenosine 5'-monophosphate phosphoribohydrolase activity; GO:0009691,cytokinin biosynthetic process; GO:0003674,molecular_function; GO:0003824,catalytic activity; GO:0016787,hydrolase activity; GO:0016798,hydrolase activity, acting on glycosyl bonds; GO:00067…
Os01g0713200	10.4096	13.2898	11.8497	6.4864	3.2469	6.0777	2.4368	2.7435	2.1301	5.4643	3.837	3.8861	208	273	240.5	139	101	167	62	77	47	177	118	122	-1.15359	8.04817e-06	9.46632e-05	down	-2.2264	2.17036e-30	7.5326e-29	down	-1.378	1.9268e-11	3.95863e-10	down	1	29620958	29622314	+	Gns10	Similar to Beta-glucanase	K25108 licheninase [EC:3.2.1.73] | (RefSeq) lichenase-2 (A)	--	--	E13B_HORVU RecName: Full=Glucan endo-1,3-beta-glucosidase GII; EC=3.2.1.39 {ECO:0000269|PubMed:8514770}; AltName: Full=(1->3)-beta-glucan endohydrolase GII; AltName: Full=(1->3)-beta-glucanase isoenzyme GII; AltName: Full=Beta-1,3-endoglucanase GII; Flags: Precursor;	A0A0E0N1K8_ORYRU SubName: Full=Uncharacterized protein {ECO:0000313|EnsemblPlants:ORUFI01G31730.1};	At3g57260	GO:0042973,glucan endo-1,3-beta-D-glucosidase activity; GO:0006076,(1->3)-beta-D-glucan catabolic process; GO:0050832,defense response to fungus; GO:0003674,molecular_function; GO:0003824,catalytic activity; GO:0004553,hydrolase activity, hydrolyzing O-glycosyl compounds; GO:0008422,beta-glucosidase activity; GO:0015926,glucosidase activity; GO:0016787,hydrolase activity; GO:0016798,hydrolase act…
Os01g0713900	5.8936	11.3864	8.64	3.752	5.3522	7.0641	5.6035	7.379	3.828	5.8419	3.3011	2.7681	145	288	216.5	99	205	239	179.5	255	104	233	125	107	-0.659979	0.0178334	0.0646408	false	-0.562855	0.0326183	0.068774	false	-1.07338	0.000620681	0.00281896	down	1	29670703	29675358	-	Os01g0713900	Similar to Myosin	K10357 myosin V | (RefSeq) myosin-17 isoform X1 (A)	--	--	MYO17_ARATH RecName: Full=Myosin-17; AltName: Full=Myosin XI K; Short=AtXIK;	A0A0E0FS65_ORYNI SubName: Full=Uncharacterized protein {ECO:0000313|EnsemblPlants:ONIVA01G32800.5};	At5g20490	GO:0015629,actin cytoskeleton; GO:0005737,cytoplasm; GO:0016459,myosin complex; GO:0009506,plasmodesma; GO:0035619,root hair tip; GO:0030133,transport vesicle; GO:0031982,vesicle; GO:0051015,actin filament binding; GO:0030898,actin-dependent ATPase activity; GO:0005524,ATP binding; GO:0005516,calmodulin binding; GO:0000146,microfilament motor activity; GO:0003774,motor activity; GO:0007015,actin …
Os01g0714600	22.4843	25.3746	23.9294	5.0381	9.1061	8.7033	6.176	4.8809	7.4711	7.0245	9.4373	6.1385	387	449	418	93	244	206	130	118	142	196	250	166	-1.62513	3.01967e-15	1.54168e-13	down	-1.92938	3.81704e-29	1.23511e-27	down	-1.61569	9.97561e-19	4.85238e-17	down	1	29708354	29709366	+	Os01g0714600	Similar to cDNA clone:J023088C01%2C full insert sequence	--	--	--	--	A0A0D3ET99_9ORYZ SubName: Full=Uncharacterized protein {ECO:0000313|EnsemblPlants:OBART01G28720.1};	--	GO:0016021,integral component of membrane; GO:0005575,cellular_component; GO:0016020,membrane; GO:0031224,intrinsic component of membrane; GO:0110165,cellular anatomical entity
Os01g0714800	0.7893	1.1037	0.9465	0.414	0.8873	0.861	0.37185	0.3863	0.3574	0.5478	0.0962	0.471	16	23	19.5	9	28	24	9.5	11	8	18	3	15	-0.372294	0.471538	0.66012	false	-1.29019	0.0112099	0.0278371	down	-1.30522	0.0490661	0.111496	false	1	29720923	29723065	-	OsWRKY26	WRKY transcription factor 26	K13424 WRKY transcription factor 33 | (RefSeq) probable WRKY transcription factor 33 (A)	ko04016: MAPK signaling pathway - plant; ko04626: Plant-pathogen interaction	--	WRK50_ARATH RecName: Full=Probable WRKY transcription factor 50; AltName: Full=WRKY DNA-binding protein 50;	A0A0P0V7I8_ORYSJ SubName: Full=Os01g0714800 protein {ECO:0000313|EMBL:BAF05973.1}; SubName: Full=WRKY13-like {ECO:0000313|EMBL:BAD87567.1};	At5g26170	GO:0005634,nucleus; GO:0003700,DNA-binding transcription factor activity; GO:0043565,sequence-specific DNA binding; GO:0050832,defense response to fungus; GO:0009867,jasmonic acid mediated signaling pathway; GO:0003674,molecular_function; GO:0140110,transcription regulator activity; GO:0003676,nucleic acid binding; GO:0003677,DNA binding; GO:0005488,binding; GO:0097159,organic cyclic compound bin…
Os01g0716200	2.4558	0.8371	1.64645	1.6831	0.7685	2.0911	3.73115	3.0335	4.4288	4.687	3.6958	11.3153	117	41	79	86	57	137	218	203	233	362	271	847	-0.101373	0.813787	0.903103	false	1.21518	0.000109037	0.000447199	up	2.05986	0.00189005	0.00744344	up	1	29801081	29806870	-	Os01g0716200	IQ calmodulin-binding region domain containing protein	--	--	--	IQD31_ARATH RecName: Full=Protein IQ-DOMAIN 31 {ECO:0000303|PubMed:16368012}; Short=AtIQD31 {ECO:0000303|PubMed:16368012};	A0A0P0V7D9_ORYSJ SubName: Full=Calmodulin-binding family protein-like {ECO:0000313|EMBL:BAD87380.1}; SubName: Full=Os01g0716200 protein {ECO:0000313|EMBL:BAF05982.1};	At1g74690	GO:0005829,cytosol; GO:0005875,microtubule associated complex; GO:0005739,mitochondrion; GO:0005886,plasma membrane; GO:0005575,cellular_component; GO:0005622,intracellular anatomical structure; GO:0005737,cytoplasm; GO:0110165,cellular anatomical entity; GO:0005856,cytoskeleton; GO:0015630,microtubule cytoskeleton; GO:0032991,protein-containing complex; GO:0043226,organelle; GO:0043228,non-membr…
Os01g0718500	4.0629	3.952	4.00745	1.9483	2.6844	3.7143	0.58215	0.7438	0.4205	1.647	0.6034	0.5172	35	35	35	18	36	44	6.5	9	4	23	8	7	-0.499253	0.207118	0.387599	false	-2.74464	2.56372e-08	1.86291e-07	down	-2.06886	0.000104211	0.000589227	down	1	29937455	29938094	+	Os01g0718500	Protein of unknown function DUF1070 domain containing protein	--	--	--	--	Q5JLA0_ORYSJ SubName: Full=Os01g0718500 protein {ECO:0000313|EMBL:BAS74052.1}; SubName: Full=cDNA clone:002-181-G02, full insert sequence {ECO:0000313|EMBL:BAG99223.1};	--	GO:0016021,integral component of membrane; GO:0005575,cellular_component; GO:0016020,membrane; GO:0031224,intrinsic component of membrane; GO:0110165,cellular anatomical entity
Os01g0719000	5.947	4.4283	5.18765	1.5679	1.4226	2.6842	1.26855	1.46	1.0771	1.771	1.359	2.1666	145	111	128	41	54	90	39.5	50	29	70	51	83	-1.43488	1.11874e-06	1.59122e-05	down	-1.9681	2.16305e-15	3.17904e-14	down	-1.49869	3.16438e-08	3.83472e-07	down	1	29960694	29963065	+	Os01g0719000	Protein of unknown function DUF581 family protein	--	--	--	FLZ10_ARATH RecName: Full=FCS-Like Zinc finger 10 {ECO:0000303|PubMed:24901469};	Q5JL98_ORYSJ SubName: Full=Os01g0719000 protein {ECO:0000313|EMBL:BAS74056.1}; SubName: Full=cDNA clone:001-030-F10, full insert sequence {ECO:0000313|EMBL:BAG87544.1}; SubName: Full=cDNA clone:J033080J22, full insert sequence {ECO:0000313|EMBL:BAG95346.1};	At5g11460	GO:0005737,cytoplasm; GO:0005783,endoplasmic reticulum; GO:0005634,nucleus; GO:0019900,kinase binding; GO:0046872,metal ion binding; GO:1902074,response to salt; GO:0042594,response to starvation; GO:0090351,seedling development; GO:0003674,molecular_function; GO:0005488,binding; GO:0005515,protein binding; GO:0019899,enzyme binding; GO:0043167,ion binding; GO:0043169,cation binding; GO:0008150,b…
Os01g0719400	2.0453	1.6542	1.84975	4.4785	2.8638	3.9941	4.79015	4.5648	5.0155	4.2387	4.5093	4.4027	89	74	81.5	209	194	239	260	279	241	299	302	301	1.04597	1.53952e-05	0.000168928	up	1.40992	2.35353e-15	3.44171e-14	up	1.29641	1.59219e-11	3.32315e-10	up	1	29995196	29999996	+	Os01g0719400	CASC3/Barentsz eIF4AIII binding domain containing protein	--	--	--	MLN51_ARATH RecName: Full=Protein MLN51 homolog; AltName: Full=Protein CASC3 homolog {ECO:0000305}; AltName: Full=Protein barentsz {ECO:0000305}; Short=Btz {ECO:0000305};	Q0JJT0_ORYSJ SubName: Full=Glycine-rich protein-like {ECO:0000313|EMBL:BAD87764.1}; SubName: Full=Os01g0719400 protein {ECO:0000313|EMBL:BAF05998.1};	At1g80000	GO:0005737,cytoplasm; GO:0005634,nucleus; GO:0003729,mRNA binding; GO:0006397,mRNA processing; GO:0051028,mRNA transport; GO:0000184,nuclear-transcribed mRNA catabolic process, nonsense-mediated decay; GO:0006417,regulation of translation; GO:0008380,RNA splicing; GO:0003674,molecular_function; GO:0003676,nucleic acid binding; GO:0003723,RNA binding; GO:0005488,binding; GO:0097159,organic cyclic …
Os01g0719600	9.8547	5.392	7.62335	11.3584	11.1217	15.1785	18.1676	16.5655	19.7697	21.8676	22.6326	23.521	144	81	112.5	178	253	305	329.5	340	319	518	509	540	0.743015	0.00300282	0.0158359	false	1.29492	9.90464e-10	8.54959e-09	up	1.62989	8.48218e-14	2.38531e-12	up	1	30003535	30005888	+	Os01g0719600	Heavy metal transport/detoxification protein domain containing protein	K07213 copper chaperone | (RefSeq) copper transport protein ATX1 (A)	--	--	NAKR2_ARATH RecName: Full=Protein SODIUM POTASSIUM ROOT DEFECTIVE 2 {ECO:0000303|PubMed:21193571}; Short=NaKR2 {ECO:0000303|PubMed:21193571}; AltName: Full=Heavy metal-associated plant protein 3 {ECO:0000303|PubMed:23368984}; Short=AtHPP03 {ECO:0000303|PubMed:23368984};	A0A0D3ETE6_9ORYZ RecName: Full=HMA domain-containing protein {ECO:0000259|PROSITE:PS50846};	At3g24450	GO:0046872,metal ion binding; GO:0003674,molecular_function; GO:0005488,binding; GO:0043167,ion binding; GO:0043169,cation binding
Os01g0720400	0.9096	1.7174	1.3135	2.7439	3.2993	4.4355	3.086	2.2474	3.9246	2.2113	3.8587	3.3373	17	33	25	55	96	114	70	59	81	67	111	98	1.4298	9.0878e-05	0.000802492	up	1.25551	0.000460107	0.00164815	up	1.31016	0.000738171	0.00327972	up	1	30025366	30026465	-	OsACP1	HAD-superfamily subfamily IB hydrolase%2C hypothetical 1 protein	K06124 phosphoethanolamine/phosphocholine phosphatase [EC:3.1.3.75] | (RefSeq) inorganic pyrophosphatase 1 (A)	ko00564: Glycerophospholipid metabolism; ko01100: Metabolic pathways	--	PPSP1_ARATH RecName: Full=Inorganic pyrophosphatase 1; Short=AtPPsPase1; Short=PPi phosphatase 1; Short=Pyrophosphate-specific phosphatase 1; EC=3.6.1.1; AltName: Full=Protein PHOSPHATE STARVATION-INDUCED GENE 2; Short=AtPS2;	A0A0N7KDN0_ORYSJ SubName: Full=Os01g0720400 protein {ECO:0000313|EMBL:BAF06003.1}; SubName: Full=Phosphatase-like {ECO:0000313|EMBL:BAB84416.1};	At1g73010	GO:0004427,inorganic diphosphatase activity; GO:0046872,metal ion binding; GO:0016791,phosphatase activity; GO:0016462,pyrophosphatase activity; GO:0071456,cellular response to hypoxia; GO:0016036,cellular response to phosphate starvation; GO:0051262,protein tetramerization; GO:0003674,molecular_function; GO:0003824,catalytic activity; GO:0016787,hydrolase activity; GO:0016817,hydrolase activity,…
Os01g0720700	7.3133	8.2993	7.8063	24.1916	13.6456	10.8895	13.1197	12.5207	13.7186	8.3781	12.6712	9.5311	42	49	45.5	149	122	86	94	101	87	78	112	86	1.06984	0.00199042	0.0112366	up	0.781841	0.00133735	0.00430123	false	0.432981	0.152514	0.268173	false	1	30043446	30043783	+	OsSAT	Similar to satase isoform I	--	--	--	--	--	--	--
Os01g0721200	1.4617	1.8709	1.6663	0.0359	0.5436	0.3357	0.2862	0.3286	0.2438	0.261	0.3749	0.4897	38	50	44	1	22	12	9.5	12	7	11	15	20	-2.38443	3.22506e-05	0.000325892	down	-2.45735	5.04772e-09	4.02494e-08	down	-2.09575	1.20082e-06	1.05385e-05	down	1	30068602	30070131	+	Os01g0721200	Similar to cDNA clone:J013002N02%2C full insert sequence	--	--	--	RGA3_SOLBU RecName: Full=Putative disease resistance protein RGA3; AltName: Full=Blight resistance protein B149; AltName: Full=RGA1-blb;	A0A0P0V7L9_ORYSJ SubName: Full=Os01g0721200 protein {ECO:0000313|EMBL:BAS74084.1};	At3g14470	GO:0043531,ADP binding; GO:0005524,ATP binding; GO:0006952,defense response; GO:0000166,nucleotide binding; GO:0003674,molecular_function; GO:0005488,binding; GO:0017076,purine nucleotide binding; GO:0030554,adenyl nucleotide binding; GO:0032553,ribonucleotide binding; GO:0032555,purine ribonucleotide binding; GO:0032559,adenyl ribonucleotide binding; GO:0036094,small molecule binding; GO:0043167…
Os01g0721300	5.5604	5.7896	5.675	1.2049	1.5092	1.2529	1.26055	1.4218	1.0993	2.1981	1.323	1.1215	142	152	147	33	60	44	41	51	31	91	52	45	-2.0738	5.81311e-18	3.71388e-16	down	-2.1148	2.19631e-21	4.82674e-20	down	-1.8245	4.19178e-11	8.18658e-10	down	1	30075624	30077126	+	Os01g0721300	Similar to cDNA clone:J013002N02%2C full insert sequence	--	--	--	RGA3_SOLBU RecName: Full=Putative disease resistance protein RGA3; AltName: Full=Blight resistance protein B149; AltName: Full=RGA1-blb;	A0A0P0V7K0_ORYSJ SubName: Full=NBS-LRR-like protein {ECO:0000313|EMBL:BAD87402.1};	At3g14470	GO:0043531,ADP binding; GO:0005524,ATP binding; GO:0006952,defense response; GO:0000166,nucleotide binding; GO:0003674,molecular_function; GO:0005488,binding; GO:0017076,purine nucleotide binding; GO:0030554,adenyl nucleotide binding; GO:0032553,ribonucleotide binding; GO:0032555,purine ribonucleotide binding; GO:0032559,adenyl ribonucleotide binding; GO:0036094,small molecule binding; GO:0043167…
Os01g0721400	4.4922	5.6995	5.09585	0.8499	0.8155	1.8937	1.111	1.0429	1.1791	1.5261	1.0152	1.3053	138	180	159	28	39	80	42.5	45	40	76	48	63	-2.08175	9.81316e-11	2.78811e-09	down	-2.16878	3.96242e-22	9.06519e-21	down	-1.93682	1.40205e-15	4.86704e-14	down	1	30079674	30081481	+	Os01g0721400	NB-ARC domain containing protein	--	--	--	RGA3_SOLBU RecName: Full=Putative disease resistance protein RGA3; AltName: Full=Blight resistance protein B149; AltName: Full=RGA1-blb;	A0A0P0V7K1_ORYSJ SubName: Full=Fusarium resistance protein I2C-5-like {ECO:0000313|EMBL:BAB84428.1}; SubName: Full=Os01g0721400 protein {ECO:0000313|EMBL:BAF06009.1};	At3g14470	GO:0043531,ADP binding; GO:0005524,ATP binding; GO:0006952,defense response; GO:0000166,nucleotide binding; GO:0003674,molecular_function; GO:0005488,binding; GO:0017076,purine nucleotide binding; GO:0030554,adenyl nucleotide binding; GO:0032553,ribonucleotide binding; GO:0032555,purine ribonucleotide binding; GO:0032559,adenyl ribonucleotide binding; GO:0036094,small molecule binding; GO:0043167…
Os01g0721800	2.2934	2.3251	2.30925	0.3012	0.2697	0.3523	0.22575	0.276	0.1755	0.2989	0.1889	0.2262	71	74	72.5	10	13	15	9	12	6	15	9	11	-2.88811	1.42009e-14	6.74916e-13	down	-3.28045	1.19248e-17	2.08792e-16	down	-3.2197	5.84036e-17	2.33186e-15	down	1	30091365	30093186	+	Os01g0721800	Protein kinase-like domain containing protein	--	--	--	RGA3_SOLBU RecName: Full=Putative disease resistance protein RGA3; AltName: Full=Blight resistance protein B149; AltName: Full=RGA1-blb;	A0A0D3ETG7_9ORYZ RecName: Full=Rx_N domain-containing protein {ECO:0000259|Pfam:PF18052};	At3g14470	GO:0043531,ADP binding; GO:0005524,ATP binding; GO:0006952,defense response; GO:0000166,nucleotide binding; GO:0003674,molecular_function; GO:0005488,binding; GO:0017076,purine nucleotide binding; GO:0030554,adenyl nucleotide binding; GO:0032553,ribonucleotide binding; GO:0032555,purine ribonucleotide binding; GO:0032559,adenyl ribonucleotide binding; GO:0036094,small molecule binding; GO:0043167…
Os01g0723800	13.8809	10.305	12.093	25.2018	18.0967	22.7063	27.6114	25.1656	30.0571	21.6962	27.1997	22.5261	946	722	834	1842	1920	2128	2335.5	2409	2262	2397	2853	2412	0.88524	2.2021e-08	4.40476e-07	false	1.23024	6.76331e-21	1.44698e-19	up	1.031	2.91486e-12	6.69932e-11	up	1	30189384	30195340	-	OsABCB7	Similar to P-glycoprotein homologue	K05658 ATP-binding cassette, subfamily B (MDR/TAP), member 1 [EC:7.6.2.2] | (RefSeq) putative ABC transporter B family member 8 (A)	ko02010: ABC transporters	--	AB8B_ARATH RecName: Full=Putative ABC transporter B family member 8; Short=ABC transporter ABCB.8; Short=AtABCB8; AltName: Full=P-glycoprotein 8; AltName: Full=Putative multidrug resistance protein 22;	Q8GU81_ORYSJ SubName: Full=MDR-like ABC transporter {ECO:0000313|EMBL:CAD59577.1}; SubName: Full=Os01g0723800 protein {ECO:0000313|EMBL:BAS74113.1};	At3g28345	GO:0016021,integral component of membrane; GO:0005524,ATP binding; GO:0042626,ATPase-coupled transmembrane transporter activity; GO:0055085,transmembrane transport; GO:0000166,nucleotide binding; GO:0003674,molecular_function; GO:0005488,binding; GO:0017076,purine nucleotide binding; GO:0030554,adenyl nucleotide binding; GO:0032553,ribonucleotide binding; GO:0032555,purine ribonucleotide binding;…
Os01g0724450	0.3796	0.8123	0.59595	0.4672	0.4389	0.4638	0.4505	0.5297	0.3713	0.2997	0.217	0.1353	25	55	40	33	45	42	38	49	27	32	22	14	-0.36733	0.3421	0.539118	false	-0.349787	0.333476	0.455717	false	-1.40666	0.00287439	0.0106513	down	1	30214447	30218322	-	Os01g0724450	Hypothetical gene	K05681 ATP-binding cassette, subfamily G (WHITE), member 2 | (RefSeq) ABC transporter G family member 25 (A)	ko02010: ABC transporters	--	AB38G_ORYSJ RecName: Full=ABC transporter G family member 38 {ECO:0000303|PubMed:18299247}; Short=OsABCG38 {ECO:0000303|PubMed:18299247}; AltName: Full=Pleiotropic drug resistance protein 15 {ECO:0000303|PubMed:12644668, ECO:0000303|PubMed:16506311}; Short=OsPDR15 {ECO:0000303|PubMed:16506311};	J3L3M8_ORYBR SubName: Full=Uncharacterized protein {ECO:0000313|EnsemblPlants:OB01G38340.1};	At3g16340	GO:0016021,integral component of membrane; GO:0005524,ATP binding; GO:0042626,ATPase-coupled transmembrane transporter activity; GO:0000166,nucleotide binding; GO:0003674,molecular_function; GO:0005488,binding; GO:0017076,purine nucleotide binding; GO:0030554,adenyl nucleotide binding; GO:0032553,ribonucleotide binding; GO:0032555,purine ribonucleotide binding; GO:0032559,adenyl ribonucleotide bi…
Os01g0724700	5.5423	6.8458	6.19405	2.9531	3.9557	3.9664	2.45895	2.1295	2.7884	3.7445	2.6293	0.9519	63	80	71.5	36	70	62	34.5	34	35	69	46	17	-0.749871	0.00854522	0.0363362	false	-1.31535	2.96113e-06	1.5918e-05	down	-1.30194	0.00268915	0.0100733	down	1	30225839	30226507	+	Os01g0724700	Similar to lachrymatory-factor synthase	--	--	--	LFS_ALLCE RecName: Full=Lachrymatory-factor synthase; Flags: Precursor;	C7IXR7_ORYSJ SubName: Full=Os01g0724700 protein {ECO:0000313|EMBL:BAH91277.1};	At4g32870	GO:0005773,vacuole; GO:0005575,cellular_component; GO:0005622,intracellular anatomical structure; GO:0005737,cytoplasm; GO:0043226,organelle; GO:0043227,membrane-bounded organelle; GO:0043229,intracellular organelle; GO:0043231,intracellular membrane-bounded organelle; GO:0110165,cellular anatomical entity
Os01g0725400	3.0297	1.9438	2.48675	1.0218	0.4969	1.5469	0.2315	0.2295	0.2335	0.8748	0.3351	0.3693	47	31	39	17	12	33	4.5	5	4	22	8	9	-1.27056	0.00863243	0.0366338	down	-3.43915	3.37728e-10	3.09181e-09	down	-2.18803	1.8596e-05	0.000127071	down	1	30241954	30251103	+	Os01g0725400	Uncharacterised protein family UPF0497%2C trans-membrane plant subgroup domain containing protein	--	--	--	CSPLC_ORYSI RecName: Full=CASP-like protein 3A1; Short=OsCASPL3A1;	I1NRD2_ORYGL RecName: Full=CASP-like protein {ECO:0000256|RuleBase:RU361233};	At3g16300	GO:0016021,integral component of membrane; GO:0005886,plasma membrane; GO:0005575,cellular_component; GO:0016020,membrane; GO:0031224,intrinsic component of membrane; GO:0110165,cellular anatomical entity; GO:0071944,cell periphery
Os01g0726801	2.0388	2.512	2.2754	7.4775	3.7543	2.9652	5.9056	5.9029	5.9083	3.5215	2.4728	3.72	15	19	17	59	43	30	54.5	61	48	42	28	43	1.06984	0.0289158	0.0936608	false	1.41265	5.36348e-05	0.000233855	up	0.5635	0.207756	0.337841	false	1	30298621	30299053	+	Os01g0726801	Non-protein coding transcript	--	--	--	--	Q5JM54_ORYSJ SubName: Full=Uncharacterized protein P0042A10.27 {ECO:0000313|EMBL:BAD87453.1};	--	--
Os01g0727800	0.8112	0.3068	0.559	0.6303	0.8105	0.7537	1.2333	0.8342	1.6324	1.3065	1.2005	1.6636	18	7	12.5	15	28	23	33	26	40	47	41	58	0.434984	0.444746	0.636911	false	1.18527	0.0171699	0.0400174	up	1.3927	0.00494554	0.0168527	up	1	30344172	30345745	-	OsSub3	Peptidase S8%2C subtilisin-related domain containing protein	--	--	--	SBT56_ARATH RecName: Full=Subtilisin-like protease SBT5.6 {ECO:0000303|PubMed:16193095}; EC=3.4.21.- {ECO:0000255|PROSITE-ProRule:PRU10082}; AltName: Full=Subtilase subfamily 5 member 6 {ECO:0000303|PubMed:16193095}; Short=AtSBT5.6 {ECO:0000303|PubMed:16193095}; Flags: Precursor;	A0A0P0V7P3_ORYSJ SubName: Full=Os01g0727800 protein {ECO:0000313|EMBL:BAF06038.1}; Flags: Fragment;	At5g45650	GO:0005576,extracellular region; GO:0004252,serine-type endopeptidase activity; GO:0003674,molecular_function; GO:0003824,catalytic activity; GO:0004175,endopeptidase activity; GO:0008233,peptidase activity; GO:0008236,serine-type peptidase activity; GO:0016787,hydrolase activity; GO:0017171,serine hydrolase activity; GO:0140096,catalytic activity, acting on a protein; GO:0005575,cellular_compone…
Os01g0727840	1.2125	1.9052	1.55885	3.3918	2.8758	2.6452	4.9367	5.3123	4.5611	3.4522	3.3331	4.2149	13	21	17	39	48	39	67	80	54	60	55	71	0.945891	0.0269604	0.0890668	false	1.70844	5.55684e-07	3.35516e-06	up	1.28803	0.00129593	0.00537318	up	1	30347875	30349017	-	OsSub3	Similar to subtilase family protein	--	--	--	SBT56_ARATH RecName: Full=Subtilisin-like protease SBT5.6 {ECO:0000303|PubMed:16193095}; EC=3.4.21.- {ECO:0000255|PROSITE-ProRule:PRU10082}; AltName: Full=Subtilase subfamily 5 member 6 {ECO:0000303|PubMed:16193095}; Short=AtSBT5.6 {ECO:0000303|PubMed:16193095}; Flags: Precursor;	A0A0P0V7R1_ORYSJ SubName: Full=Os01g0727840 protein {ECO:0000313|EMBL:BAS74141.1};	At5g45650	GO:0005576,extracellular region; GO:0004252,serine-type endopeptidase activity; GO:0003674,molecular_function; GO:0003824,catalytic activity; GO:0004175,endopeptidase activity; GO:0008233,peptidase activity; GO:0008236,serine-type peptidase activity; GO:0016787,hydrolase activity; GO:0017171,serine hydrolase activity; GO:0140096,catalytic activity, acting on a protein; GO:0005575,cellular_compone…
Os01g0728300	3.9292	4.4772	4.2032	1.23	1.1538	1.2858	0.7445	0.5994	0.8896	1.4197	1.6047	1.6077	140	164	152	47	64	63	32.5	30	35	82	88	90	-1.76317	5.16791e-15	2.55478e-13	down	-2.48596	1.05549e-24	2.73832e-23	down	-1.39112	3.61745e-11	7.12437e-10	down	1	30372204	30376912	-	Os01g0728300	Similar to Cytochrome P450 monooxygenase CYP72A5 (Fragment)	K20660 cytochrome P450 family 709 | (RefSeq) cytochrome P450 709B2 (A)	--	--	C7A39_KALSE RecName: Full=Cytochrome P450 72A397; EC=1.14.14.- {ECO:0000269|PubMed:29186583};	A0A0D9YEH0_9ORYZ SubName: Full=Uncharacterized protein {ECO:0000313|EnsemblPlants:OGLUM01G33680.1};	At3g14680	GO:0016021,integral component of membrane; GO:0020037,heme binding; GO:0005506,iron ion binding; GO:0016712,oxidoreductase activity, acting on paired donors, with incorporation or reduction of molecular oxygen, reduced flavin or flavoprotein as one donor, and incorporation of one atom of oxygen; GO:0016134,saponin metabolic process; GO:0003674,molecular_function; GO:0005488,binding; GO:0046906,te…
Os01g0730100	2.8136	2.9243	2.86895	2.1563	1.6093	2.6066	0.98245	0.6037	1.3612	0.9035	1.3523	1.153	73	78	75.5	60	65	93	30.5	22	39	38	54	47	-0.420865	0.134659	0.290178	false	-1.55053	1.51111e-06	8.51418e-06	down	-1.286	1.34804e-05	9.47438e-05	down	1	30447427	30449206	-	OsFbox035	Cyclin-like F-box domain containing protein	--	--	--	FBL64_ARATH RecName: Full=F-box/LRR-repeat protein At3g59200;	A0A0P0V7R4_ORYSJ SubName: Full=Os01g0730100 protein {ECO:0000313|EMBL:BAF06053.1}; SubName: Full=Putative ribosomal RNA apurinic site specific lyase {ECO:0000313|EMBL:BAB21169.1};	At3g59200	--
Os01g0730700	5.8377	8.1069	6.9723	3.0126	1.6509	2.8568	2.12955	1.699	2.5601	3.9861	2.6002	2.5471	159	227	193	88	70	107	71	65	77	176	109	109	-1.46428	2.71384e-08	5.31472e-07	down	-1.68707	2.60398e-14	3.48592e-13	down	-1.1449	1.49911e-06	1.29236e-05	down	1	30480114	30481849	-	OsWRKY14	WRKY transcription factor 14 (WRKY14)	K13425 WRKY transcription factor 22 | (RefSeq) WRKY transcription factor 22 (A)	ko04016: MAPK signaling pathway - plant; ko04626: Plant-pathogen interaction	--	WRK65_ARATH RecName: Full=Probable WRKY transcription factor 65; AltName: Full=WRKY DNA-binding protein 65;	A0A0P0V7S8_ORYSJ SubName: Full=Os01g0730700 protein {ECO:0000313|EMBL:BAF06058.1}; SubName: Full=Putative WRKY transcription factor {ECO:0000313|EMBL:BAB63527.1};	At1g29280	GO:0005634,nucleus; GO:0003700,DNA-binding transcription factor activity; GO:0000976,transcription regulatory region sequence-specific DNA binding; GO:0003674,molecular_function; GO:0140110,transcription regulator activity; GO:0001067,regulatory region nucleic acid binding; GO:0003676,nucleic acid binding; GO:0003677,DNA binding; GO:0003690,double-stranded DNA binding; GO:0005488,binding; GO:0043…
Os01g0731201	0.7468	1.4074	1.0771	0.4352	0.5696	0.4412	0.28535	0.2326	0.3381	0.4894	0.2729	0.2079	16	31	23.5	10	19	13	7.5	7	8	17	9	7	-1.1449	0.0275096	0.0903323	false	-1.87509	0.000459582	0.00164653	down	-1.69579	0.00329417	0.0119531	down	1	30516127	30517387	-	Os01g0731201	Hypothetical gene	K02927 ubiquitin-large subunit ribosomal protein L40e | (RefSeq) ubiquitin-60S ribosomal protein L40 (A)	ko03010: Ribosome; ko04120: Ubiquitin mediated proteolysis	--	UBQ9_ARATH RecName: Full=Polyubiquitin 9; Contains: RecName: Full=Ubiquitin-related 1; Contains: RecName: Full=Ubiquitin-related 2; Contains: RecName: Full=Ubiquitin-related 3; Contains: RecName: Full=Ubiquitin-related 4; Flags: Precursor;	A0A0P0V7V3_ORYSJ SubName: Full=Os01g0731375 protein {ECO:0000313|EMBL:BAS74187.1};	At5g37640	GO:0005618,cell wall; GO:0005737,cytoplasm; GO:0005730,nucleolus; GO:0005634,nucleus; GO:0009536,plastid; GO:0005774,vacuolar membrane; GO:0003729,mRNA binding; GO:0031386,protein tag; GO:0031625,ubiquitin protein ligase binding; GO:0019941,modification-dependent protein catabolic process; GO:0016567,protein ubiquitination; GO:0006511,ubiquitin-dependent protein catabolic process; GO:0003674,mole…
Os01g0734000	1.3614	2.5466	1.954	2.49	1.5472	5.1404	2.0394	1.5657	2.5131	4.4574	7.0764	2.6328	26	50	38	51	46	135	47.5	42	53	138	208	79	0.662202	0.146797	0.307979	false	0.0905821	0.794907	0.858407	false	1.32136	0.00104649	0.00445339	up	1	30604326	30608077	+	OsWRKY23	Similar to WRKY DNA binding protein	K18835 WRKY transcription factor 2 | (RefSeq) probable WRKY transcription factor 2 (A)	ko04626: Plant-pathogen interaction	--	WRK24_ARATH RecName: Full=Probable WRKY transcription factor 24; AltName: Full=WRKY DNA-binding protein 24;	Q7F4A9_ORYSJ SubName: Full=Os01g0734000 protein {ECO:0000313|EMBL:BAF06077.1}; SubName: Full=Putative WRKY DNA binding protein {ECO:0000313|EMBL:BAB89937.1};	At5g41570	GO:0005634,nucleus; GO:0003700,DNA-binding transcription factor activity; GO:0043565,sequence-specific DNA binding; GO:0003674,molecular_function; GO:0140110,transcription regulator activity; GO:0003676,nucleic acid binding; GO:0003677,DNA binding; GO:0005488,binding; GO:0097159,organic cyclic compound binding; GO:1901363,heterocyclic compound binding; GO:0005575,cellular_component; GO:0005622,in…
Os01g0734466	9.9845	9.2416	9.61305	12.2805	9.666	14.4592	17.0893	13.751	20.4277	17.0384	20.1087	30.6338	351	334	342.5	463	529	699	736	679	793	971	1088	1692	0.356136	0.0346953	0.108286	false	0.863888	7.06134e-08	4.83419e-07	false	1.29366	2.05144e-09	3.09263e-08	up	1	30630841	30634318	+	rbohA	Similar to NAD(P)H oxidase (Fragment)	K13447 respiratory burst oxidase [EC:1.6.3.- 1.11.1.-] | (RefSeq) respiratory burst oxidase homolog protein A (A)	ko04016: MAPK signaling pathway - plant; ko04626: Plant-pathogen interaction	--	RBOHF_ARATH RecName: Full=Respiratory burst oxidase homolog protein F; EC=1.11.1.-; EC=1.6.3.-; AltName: Full=Cytochrome b245 beta chain homolog RbohAp108; AltName: Full=NADPH oxidase RBOHF; Short=AtRBOHF;	A0A0P0V7W2_ORYSJ SubName: Full=Os01g0734466 protein {ECO:0000313|EMBL:BAS74214.1}; Flags: Fragment;	At1g64060	GO:0016021,integral component of membrane; GO:0005886,plasma membrane; GO:0005509,calcium ion binding; GO:0016174,NAD(P)H oxidase H2O2-forming activity; GO:0004601,peroxidase activity; GO:0009738,abscisic acid-activated signaling pathway; GO:0033500,carbohydrate homeostasis; GO:0052542,defense response by callose deposition; GO:0009873,ethylene-activated signaling pathway; GO:0050665,hydrogen per…
Os01g0734800	81.1978	93.632	87.4149	27.7475	31.8515	41.8596	31.219	29.4343	33.0037	41.1037	47.8965	49.2577	2453	2908	2680.5	899	1498	1739	1175	1249	1101	2013	2227	2338	-1.35081	6.09175e-21	4.77998e-19	down	-1.44603	3.85612e-52	3.03145e-50	down	-0.867939	3.69953e-14	1.08062e-12	false	1	30655306	30657083	+	OsUGT706F1	UDP-glucuronosyl/UDP-glucosyltransferase family protein	K08237 hydroquinone glucosyltransferase [EC:2.4.1.218] | (RefSeq) UDP-glycosyltransferase 72B3 (A)	--	--	ANGLT_ROSHC RecName: Full=Anthocyanidin 5,3-O-glucosyltransferase; EC=2.4.1.-; AltName: Full=UDP-glucose: anthocyanidin 5,3-O-glucosyltransferase;	Q0JJJ7_ORYSJ RecName: Full=Glycosyltransferase {ECO:0000256|RuleBase:RU362057}; EC=2.4.1.- {ECO:0000256|RuleBase:RU362057};	At3g16520	GO:0008194,UDP-glycosyltransferase activity; GO:0009718,anthocyanin-containing compound biosynthetic process; GO:0003674,molecular_function; GO:0003824,catalytic activity; GO:0016740,transferase activity; GO:0016757,transferase activity, transferring glycosyl groups; GO:0008150,biological_process; GO:0008152,metabolic process; GO:0009058,biosynthetic process; GO:0009812,flavonoid metabolic proces…
Os01g0735900	1.5053	1.3928	1.44905	0.582	0.3302	1.1481	0.5345	0.4705	0.5985	0.8606	1.1928	0.5375	41	39	40	17	14	43	18	18	18	38	50	23	-1.06169	0.0268361	0.0887188	false	-1.40979	0.000120034	0.000487525	down	-0.697253	0.0812104	0.165426	false	1	30689850	30691452	-	OsUGT706B1	UDP-glucuronosyl/UDP-glucosyltransferase family protein	K08237 hydroquinone glucosyltransferase [EC:2.4.1.218] | (RefSeq) hydroquinone glucosyltransferase (A)	--	--	U88F3_PYRCO RecName: Full=UDP-glycosyltransferase 88F3 {ECO:0000303|Ref.1}; EC=2.4.1.- {ECO:0000305}; AltName: Full=UDP-glucose:chalcone 2'-O-glucosyltransferase {ECO:0000305};	A0A0D3ETR2_9ORYZ RecName: Full=Glycosyltransferase {ECO:0000256|RuleBase:RU362057}; EC=2.4.1.- {ECO:0000256|RuleBase:RU362057};	At3g16520	GO:0008194,UDP-glycosyltransferase activity; GO:0003674,molecular_function; GO:0003824,catalytic activity; GO:0016740,transferase activity; GO:0016757,transferase activity, transferring glycosyl groups
Os01g0736100	1.9629	2.0388	2.00085	0.031	0.1282	0.2903	0.0721	0.0237	0.1205	0.041	0.0216	0.0212	59	63	61	1	6	12	2.5	1	4	2	1	1	-3.67245	9.67507e-13	3.62551e-11	down	-4.96184	1.80576e-15	2.67913e-14	down	-6.10113	2.60749e-14	7.77713e-13	down	1	30694936	30696704	-	OsUGT706C1	UDP-glucuronosyl/UDP-glucosyltransferase family protein	K08237 hydroquinone glucosyltransferase [EC:2.4.1.218] | (RefSeq) hydroquinone glucosyltransferase (A)	--	--	ANGLT_ROSHC RecName: Full=Anthocyanidin 5,3-O-glucosyltransferase; EC=2.4.1.-; AltName: Full=UDP-glucose: anthocyanidin 5,3-O-glucosyltransferase;	Q942B6_ORYSJ RecName: Full=Glycosyltransferase {ECO:0000256|RuleBase:RU362057}; EC=2.4.1.- {ECO:0000256|RuleBase:RU362057};	At3g16520	GO:0008194,UDP-glycosyltransferase activity; GO:0009718,anthocyanin-containing compound biosynthetic process; GO:0003674,molecular_function; GO:0003824,catalytic activity; GO:0016740,transferase activity; GO:0016757,transferase activity, transferring glycosyl groups; GO:0008150,biological_process; GO:0008152,metabolic process; GO:0009058,biosynthetic process; GO:0009812,flavonoid metabolic proces…
Os01g0736300	2.3232	2.0886	2.2059	1.0503	0.9044	1.2031	1.2514	0.8771	1.6257	0.6514	0.8233	1.4563	66	61	63.5	32	40	47	43	35	51	30	36	65	-1.05389	0.000616323	0.00416397	down	-0.80446	0.00798004	0.0207998	false	-1.11864	0.0029919	0.0110221	down	1	30712173	30713844	-	UGT	Similar to anthocyanidin 5%2C3-O-glucosyltransferase	K08237 hydroquinone glucosyltransferase [EC:2.4.1.218] | (RefSeq) UDP-glycosyltransferase 72B1 (A)	--	--	ANGLT_ROSHC RecName: Full=Anthocyanidin 5,3-O-glucosyltransferase; EC=2.4.1.-; AltName: Full=UDP-glucose: anthocyanidin 5,3-O-glucosyltransferase;	A0A0N7KDP9_ORYSJ RecName: Full=Glycosyltransferase {ECO:0000256|RuleBase:RU362057}; EC=2.4.1.- {ECO:0000256|RuleBase:RU362057}; Flags: Fragment;	At3g16520	GO:0008194,UDP-glycosyltransferase activity; GO:0009718,anthocyanin-containing compound biosynthetic process; GO:0003674,molecular_function; GO:0003824,catalytic activity; GO:0016740,transferase activity; GO:0016757,transferase activity, transferring glycosyl groups; GO:0008150,biological_process; GO:0008152,metabolic process; GO:0009058,biosynthetic process; GO:0009812,flavonoid metabolic proces…
Os01g0736500	2.5889	2.7421	2.6655	0.751	1.0717	1.5061	0.3945	0.1638	0.6252	0.8517	1.1962	1.0985	45	49	47	14	29	36	8	4	12	24	32	30	-1.23449	0.0013186	0.00792616	down	-2.78665	1.73104e-09	1.45195e-08	down	-1.29213	0.000300118	0.00149211	down	1	30718930	30719952	+	Os01g0736500	Similar to harpin-induced protein	--	--	--	--	A0A0P0V7X3_ORYSJ SubName: Full=Os01g0736500 protein {ECO:0000313|EMBL:BAS74229.1}; Flags: Fragment;	At2g46150	GO:0016021,integral component of membrane; GO:0005575,cellular_component; GO:0016020,membrane; GO:0031224,intrinsic component of membrane; GO:0110165,cellular anatomical entity
Os01g0737300	5.6468	7.701	6.6739	2.5512	2.8793	5.4609	3.04155	3.0255	3.0576	3.6269	4.2363	4.261	97	136	116.5	47	77	129	65.5	73	58	101	112	115	-0.855727	0.00618553	0.0281887	false	-1.08731	9.55559e-07	5.57417e-06	down	-0.6676	0.00389449	0.0137498	false	1	30753801	30758956	+	Os01g0737300	Similar to Phosphoesterase	K08073 bifunctional polynucleotide phosphatase/kinase [EC:3.1.3.32 2.7.1.78] | (RefSeq) polynucleotide 3'-phosphatase ZDP (A)	--	--	ZDP_ARATH RecName: Full=Polynucleotide 3'-phosphatase ZDP; EC=3.1.3.32; AltName: Full=DNA nick sensor protein;	A0A0P0V7Y6_ORYSJ SubName: Full=Os01g0737300 protein {ECO:0000313|EMBL:BAS74236.1};	At3g14890_2	GO:0005654,nucleoplasm; GO:0046404,ATP-dependent polydeoxyribonucleotide 5'-hydroxyl-kinase activity; GO:0003690,double-stranded DNA binding; GO:0046403,polynucleotide 3'-phosphatase activity; GO:0008270,zinc ion binding; GO:0080111,DNA demethylation; GO:0006281,DNA repair; GO:0046939,nucleotide phosphorylation; GO:0003674,molecular_function; GO:0003824,catalytic activity; GO:0016301,kinase activ…
Os01g0737401	8.3635	9.3405	8.852	4.0436	4.5764	3.942	5.0056	4.962	5.0492	4.2993	5.8366	5.9146	54	62	58	28	46	35	40.5	45	36	45	58	60	-1.05712	0.000816159	0.00528357	down	-0.787779	0.00430496	0.0121071	false	-0.671707	0.0280297	0.0709905	false	1	30759831	30761217	+	Os01g0737401	Similar to diphosphonucleotide phosphatase 2	K08073 bifunctional polynucleotide phosphatase/kinase [EC:3.1.3.32 2.7.1.78] | (RefSeq) polynucleotide 3'-phosphatase ZDP (A)	--	--	ZDP_ARATH RecName: Full=Polynucleotide 3'-phosphatase ZDP; EC=3.1.3.32; AltName: Full=DNA nick sensor protein;	A0A0P0V7Y1_ORYSJ SubName: Full=Os01g0737401 protein {ECO:0000313|EMBL:BAS74237.1}; Flags: Fragment;	At3g14890_2	GO:0005654,nucleoplasm; GO:0046404,ATP-dependent polydeoxyribonucleotide 5'-hydroxyl-kinase activity; GO:0003690,double-stranded DNA binding; GO:0046403,polynucleotide 3'-phosphatase activity; GO:0008270,zinc ion binding; GO:0080111,DNA demethylation; GO:0006281,DNA repair; GO:0046939,nucleotide phosphorylation; GO:0003674,molecular_function; GO:0003824,catalytic activity; GO:0016301,kinase activ…
Os01g0738100	1.216	1.4982	1.3571	0.4913	0.729	0.9727	0.51135	0.2886	0.7341	0.7501	0.2897	0.6708	30	38	34	13	28	33	15	10	20	30	11	26	-0.86355	0.0412553	0.123155	false	-1.40899	0.00128907	0.00416138	down	-1.19588	0.0106649	0.0321818	down	1	30788977	30796475	-	Os01g0738100	Peptidase C48%2C SUMO/Sentrin/Ubl1 domain containing protein	K16287 ubiquitin-like-specific protease 1C/D [EC:3.4.22.68] | (RefSeq) ubiquitin-like-specific protease 1D (A)	--	--	ULP1D_ARATH RecName: Full=Ubiquitin-like-specific protease 1D; EC=3.4.22.-; AltName: Full=Protein OVERLY TOLERANT TO SALT 1;	A0A0P0V7Z8_ORYSJ SubName: Full=Os01g0738100 protein {ECO:0000313|EMBL:BAS74246.1};	At1g60220	GO:0016607,nuclear speck; GO:0005634,nucleus; GO:0070139,SUMO-specific endopeptidase activity; GO:0070140,SUMO-specific isopeptidase activity; GO:0016926,protein desumoylation; GO:0009651,response to salt stress; GO:0010228,vegetative to reproductive phase transition of meristem; GO:0003674,molecular_function; GO:0003824,catalytic activity; GO:0004175,endopeptidase activity; GO:0004197,cysteine-t…
Os01g0739700	2.0067	2.2142	2.11045	0.5586	0.4233	0.392	0.5978	0.4904	0.7052	0.4804	0.6033	0.4575	67	76	71.5	20	22	18	24.5	23	26	26	31	24	-2.20208	1.517e-10	4.20784e-09	down	-1.81123	1.93259e-09	1.61178e-08	down	-1.99007	4.77691e-10	7.90419e-09	down	1	30897747	30901040	+	Os01g0739700	Glycoside hydrolase%2C family 17 protein	K19892 glucan endo-1,3-beta-glucosidase 4 [EC:3.2.1.39] | (RefSeq) glucan endo-1,3-beta-glucosidase 4 (A)	ko00500: Starch and sucrose metabolism; ko01100: Metabolic pathways	--	E1313_ARATH RecName: Full=Glucan endo-1,3-beta-glucosidase 13; EC=3.2.1.39; AltName: Full=(1->3)-beta-glucan endohydrolase 13; Short=(1->3)-beta-glucanase 13; AltName: Full=Beta-1,3-endoglucanase 13; Short=Beta-1,3-glucanase 13; Flags: Precursor;	A0A0E0DZ24_9ORYZ RecName: Full=Glucan endo-1,3-beta-D-glucosidase {ECO:0000256|ARBA:ARBA00012780}; EC=3.2.1.39 {ECO:0000256|ARBA:ARBA00012780};	At5g56590	GO:0031225,anchored component of membrane; GO:0046658,anchored component of plasma membrane; GO:0005618,cell wall; GO:0005576,extracellular region; GO:0005886,plasma membrane; GO:0009536,plastid; GO:0042973,glucan endo-1,3-beta-D-glucosidase activity; GO:0005975,carbohydrate metabolic process; GO:0071555,cell wall organization; GO:0006952,defense response; GO:0003674,molecular_function; GO:000382…
Os01g0740300	3.2458	2.5049	2.87535	5.3777	3.0671	2.4969	5.84165	6.7034	4.9799	3.7232	5.0719	5.3952	121	96	108.5	215	178	128	278	351	205	225	291	316	0.365404	0.222411	0.406523	false	1.07724	3.33544e-09	2.71223e-08	up	0.777349	0.00070334	0.0031519	false	1	30909430	30916476	+	Os01g0740300	Hypothetical protein	--	--	--	--	Q0JJG4_ORYSJ SubName: Full=Os01g0740300 protein {ECO:0000313|EMBL:BAS74266.1}; SubName: Full=cDNA clone:J033105C18, full insert sequence {ECO:0000313|EMBL:BAH00709.1};	--	--
Os01g0740700	1.3275	2.9371	2.1323	1.0922	0.5351	1.0032	0.78835	1.2231	0.3536	0.7707	0.5074	0.3645	51	116	83.5	45	32	53	40.5	66	15	48	30	22	-1.27515	0.000956347	0.00602107	down	-1.36631	0.000761104	0.00260335	down	-1.91515	1.7861e-06	1.51028e-05	down	1	30939288	30941548	-	Os01g0740700	Hypothetical protein	K21844 protein FAM126 | (RefSeq) uncharacterized protein LOC4349887 (A)	--	--	KAD7_ORYSJ RecName: Full=Probable adenylate kinase 7, mitochondrial; EC=2.7.4.3 {ECO:0000250|UniProtKB:P69441}; AltName: Full=Adenylate monophosphate kinase 7; Flags: Precursor;	Q0JJG0_ORYSJ SubName: Full=Os01g0740700 protein {ECO:0000313|EMBL:BAF06118.1}; Flags: Fragment;	--	GO:0005737,cytoplasm; GO:0005739,mitochondrion; GO:0004017,adenylate kinase activity; GO:0005524,ATP binding; GO:0003674,molecular_function; GO:0003824,catalytic activity; GO:0016301,kinase activity; GO:0016740,transferase activity; GO:0016772,transferase activity, transferring phosphorus-containing groups; GO:0016776,phosphotransferase activity, phosphate group as acceptor; GO:0019205,nucleobase…
Os01g0742400	5.4011	6.4315	5.9163	1.4707	2.1492	2.9892	1.2685	1.2818	1.2552	2.9878	2.06	1.6529	339	415	377	99	210	258	100	113	87	304	199	163	-1.40282	4.42639e-10	1.15774e-08	down	-2.17913	1.70396e-45	1.05049e-43	down	-1.35643	1.47066e-10	2.65092e-09	down	1	31006026	31009770	+	Os01g0742400	Hypothetical conserved gene	K00924 kinase [EC:2.7.1.-] | (RefSeq) receptor-like protein kinase 5 (A)	--	--	MIK1_ARATH RecName: Full=MDIS1-interacting receptor like kinase 1 {ECO:0000303|PubMed:26863186}; Short=AtMIK1 {ECO:0000303|PubMed:26863186}; AltName: Full=Leucine-rich repeat receptor-like protein kinase PXL2 {ECO:0000303|PubMed:17570668}; EC=2.7.11.1 {ECO:0000305}; AltName: Full=Protein PHLOEM INTERCALATED WITH XYLEM-LIKE 2 {ECO:0000303|PubMed:17570668}; Flags: Precursor;	A0A0P0V811_ORYSJ SubName: Full=Os01g0742400 protein {ECO:0000313|EMBL:BAF06127.1}; SubName: Full=Putative LRK1 protein {ECO:0000313|EMBL:BAD87898.1};	At5g25930	GO:0016021,integral component of membrane; GO:0005886,plasma membrane; GO:0090406,pollen tube; GO:0005524,ATP binding; GO:0004672,protein kinase activity; GO:0106310,protein serine kinase activity; GO:0106311,protein threonine kinase activity; GO:0030154,cell differentiation; GO:0010087,phloem or xylem histogenesis; GO:0010183,pollen tube guidance; GO:0010067,procambium histogenesis; GO:0046777,p…
Os01g0743500	2.2625	2.8972	2.57985	0.3739	0.9198	2.1035	0.61715	0.8971	0.3372	0.7597	0.4652	0.4193	79	104	91.5	14	50	101	28.5	44	13	43	25	23	-1.16921	0.0112261	0.0448487	down	-1.99085	5.75915e-10	5.11835e-09	down	-2.18564	1.85613e-11	3.82625e-10	down	1	31076571	31081251	+	OscytME3	Cytosolic NADP malic enzyme	K00029 malate dehydrogenase (oxaloacetate-decarboxylating)(NADP+) [EC:1.1.1.40] | (RefSeq) NADP-dependent malic enzyme (A)	ko00620: Pyruvate metabolism; ko00710: Carbon fixation in photosynthetic organisms; ko01100: Metabolic pathways; ko01200: Carbon metabolism	--	MAOX_PHAVU RecName: Full=NADP-dependent malic enzyme; Short=NADP-ME; EC=1.1.1.40;	Q5JKW5_ORYSJ RecName: Full=Malic enzyme {ECO:0000256|RuleBase:RU003426};	At2g19900	GO:0005737,cytoplasm; GO:0004471,malate dehydrogenase (decarboxylating) (NAD+) activity; GO:0004473,malate dehydrogenase (decarboxylating) (NADP+) activity; GO:0046872,metal ion binding; GO:0051287,NAD binding; GO:0008948,oxaloacetate decarboxylase activity; GO:0003674,molecular_function; GO:0003824,catalytic activity; GO:0004470,malic enzyme activity; GO:0016491,oxidoreductase activity; GO:00166…
Os01g0745700	9.4673	8.6811	9.0742	0.1125	0.2518	4.8894	0.16775	0.1717	0.1638	0.279	0.1175	0.0192	314	296	305	4	13	223	7	8	6	15	6	1	-2.36601	0.0875981	0.213811	false	-5.71275	5.92842e-60	5.78688e-58	down	-5.97021	7.42536e-57	2.99537e-54	down	1	31180196	31182456	-	OsGATA6	Similar to GATA transcription factor 3 (AtGATA-3)	K17604 zinc finger SWIM domain-containing protein 3 | (RefSeq) protein FAR1-RELATED SEQUENCE 5 isoform X1 (A)	--	--	GAT12_ARATH RecName: Full=GATA transcription factor 12 {ECO:0000303|PubMed:15084732};	A0A0P0V873_ORYSJ RecName: Full=GATA transcription factor {ECO:0000256|PIRNR:PIRNR016992};	At5g25830	GO:0005634,nucleus; GO:0003700,DNA-binding transcription factor activity; GO:0000976,transcription regulatory region sequence-specific DNA binding; GO:0008270,zinc ion binding; GO:0030154,cell differentiation; GO:0071555,cell wall organization; GO:0007623,circadian rhythm; GO:0007275,multicellular organism development; GO:0045893,positive regulation of transcription, DNA-templated; GO:0009416,res…
Os01g0748000	1.2836	1.1862	1.2349	0.4588	0.5772	0.669	0.47	0.5331	0.4069	0.2507	0.4587	0.7898	60	57	58.5	23	42	43	28	35	21	19	33	58	-1.08825	0.000767201	0.00501102	down	-1.33396	1.06021e-05	5.20267e-05	down	-1.23914	0.00429167	0.0149201	down	1	31308254	31312885	-	Os01g0748000	Similar to Dynamin family protein	K17065 dynamin 1-like protein [EC:3.6.5.5] | (RefSeq) dynamin-related protein 3B isoform X1 (A)	--	--	DRP5A_ARATH RecName: Full=Dynamin-related protein 5A; AltName: Full=Protein ARC5-like;	A0A0P0V850_ORYSJ SubName: Full=Dynamin-like {ECO:0000313|EMBL:BAD86966.1};	At1g53140	GO:0009504,cell plate; GO:0005737,cytoplasm; GO:0016020,membrane; GO:0005874,microtubule; GO:0009524,phragmoplast; GO:0005525,GTP binding; GO:0003924,GTPase activity; GO:0008017,microtubule binding; GO:0000911,cytokinesis by cell plate formation; GO:0000166,nucleotide binding; GO:0001882,nucleoside binding; GO:0001883,purine nucleoside binding; GO:0003674,molecular_function; GO:0005488,binding; G…
Os01g0750500	15.5338	14.2123	14.873	3.5374	3.1943	4.3991	4.35375	4.3434	4.3641	1.518	1.832	1.501	303	285	294	74	97	118	106.5	119	94	48	55	46	-1.98441	7.01596e-26	8.24393e-24	down	-1.73303	6.973e-29	2.23165e-27	down	-3.14921	9.86861e-55	3.66502e-52	down	1	31453335	31457548	-	Os01g0750500	Protein of unknown function DUF814 domain containing protein	--	--	--	--	Q943H0_ORYSJ SubName: Full=Os01g0750500 protein {ECO:0000313|EMBL:BAS74359.1}; SubName: Full=cDNA clone:001-038-C01, full insert sequence {ECO:0000313|EMBL:BAG96910.1}; SubName: Full=cDNA clone:006-307-A10, full insert sequence {ECO:0000313|EMBL:BAG96525.1}; SubName: Full=cDNA clone:J013112J21, full insert sequence {ECO:0000313|EMBL:BAG90457.1};	At5g11500	--
Os01g0757400	1.7773	1.9758	1.87655	0.3788	0.3099	1.0709	0.40335	0.4158	0.3909	0.1879	0.2969	0.3878	70	80	75	16	19	58	20	23	17	12	18	24	-1.65815	0.0001597	0.00131396	down	-2.17334	1.08346e-12	1.27101e-11	down	-2.63461	1.0107e-12	2.47358e-11	down	1	31806962	31811863	+	SKD1	Similar to Katanin p60 ATPase-containing subunit A1 (EC 3.6.4.3) (Katanin p60 subunit A1) (p60 katanin). Splice isoform 2	K07767 katanin p60 ATPase-containing subunit A1 [EC:5.6.1.1] | (RefSeq) katanin p60 ATPase-containing subunit A-like 2 (A)	--	--	KTNA1_ARATH RecName: Full=Katanin p60 ATPase-containing subunit A1 {ECO:0000255|HAMAP-Rule:MF_03023}; Short=Katanin p60 subunit A1 {ECO:0000255|HAMAP-Rule:MF_03023}; EC=5.6.1.1 {ECO:0000255|HAMAP-Rule:MF_03023}; AltName: Full=CAD ATPase; AltName: Full=Katanin-1 {ECO:0000303|PubMed:11283338}; Short=AtKTN1 {ECO:0000303|PubMed:11283338}; AltName: Full=Katanin-like microtubule-severing protein {ECO:0…	A0A0E0N2M6_ORYRU RecName: Full=AAA domain-containing protein {ECO:0000259|SMART:SM00382};	At2g34560	GO:0005737,cytoplasm; GO:0005874,microtubule; GO:0015630,microtubule cytoskeleton; GO:0005634,nucleus; GO:0005524,ATP binding; GO:0016887,ATPase activity; GO:0016853,isomerase activity; GO:0008017,microtubule binding; GO:0008568,microtubule-severing ATPase activity; GO:0043622,cortical microtubule organization; GO:0031122,cytoplasmic microtubule organization; GO:0000226,microtubule cytoskeleton o…
Os01g0757600	4.9045	3.0669	3.9857	3.9198	3.0154	4.5855	6.09055	5.8362	6.3449	7.9526	6.1912	9.8554	70	45	57.5	60	67	90	108.5	117	100	184	136	221	-0.0391497	0.901273	0.950023	false	0.646234	0.008627	0.0222093	false	1.05814	0.000282561	0.00141625	up	1	31815517	31816532	-	Os01g0757600	Similar to Myosin heavy chain-like protein (Fragment)	--	--	--	ICR4_ARATH RecName: Full=Interactor of constitutive active ROPs 4; AltName: Full=ROP-interactive partner 4;	A0A0N7KDS3_ORYSJ SubName: Full=Os01g0757600 protein {ECO:0000313|EMBL:BAS74417.1};	At1g78430	--
Os01g0758500	1.9475	2.1975	2.0725	4.5762	3.1775	2.8041	5.5747	5.4352	5.7142	3.7963	5.4664	6.9167	50	58	54	126	127	99	179	196	162	158	216	279	0.780189	0.00676014	0.0301953	false	1.46745	4.66236e-13	5.65055e-12	up	1.43862	6.96734e-07	6.45348e-06	up	1	31889711	31891221	-	Os01g0758500	Similar to predicted protein	--	--	--	--	A2ZY05_ORYSJ SubName: Full=Uncharacterized protein {ECO:0000313|EMBL:EAZ13602.1};	At1g29190_1	--
Os01g0759800	0.8567	0.8334	0.84505	0.0695	0.335	0.4334	0.3399	0.4774	0.2024	0.3217	0.1936	0.0711	23	23	23	2	14	16	12	18	6	14	8	3	-1.54897	0.011682	0.0462161	down	-1.23263	0.0111669	0.0277486	down	-2.06346	0.000878028	0.00382484	down	1	31976419	31979916	-	Os01g0759800	Hypothetical protein	--	--	--	NAT2_ARATH RecName: Full=Nucleobase-ascorbate transporter 2; Short=AtNAT2;	B9ET43_ORYSJ SubName: Full=Uncharacterized protein {ECO:0000313|EMBL:EEE55411.1};	At2g34190	GO:0016021,integral component of membrane; GO:0022857,transmembrane transporter activity; GO:0003674,molecular_function; GO:0005215,transporter activity; GO:0005575,cellular_component; GO:0016020,membrane; GO:0031224,intrinsic component of membrane; GO:0110165,cellular anatomical entity
Os01g0760000	1.6038	2.0349	1.81935	1.1704	1.523	2.1805	0.87535	0.9929	0.7578	0.6883	0.9062	0.6214	23	30	26.5	18	34	43	16	20	12	16	20	14	-0.129795	0.762175	0.872598	false	-0.992043	0.0185706	0.0427992	false	-1.2403	0.00787717	0.0249732	down	1	31981933	31982776	+	Os01g0760000	Similar to Dynein light chain	K10418 dynein light chain LC8-type | (RefSeq) dynein light chain LC6, flagellar outer arm (A)	--	--	DYL1_CHLRE RecName: Full=Dynein 8 kDa light chain, flagellar outer arm;	A0A0P0V8F4_ORYSJ RecName: Full=Dynein light chain {ECO:0000256|RuleBase:RU365010};	At3g16120	GO:0005930,axoneme; GO:0097014,ciliary plasm; GO:0030286,dynein complex; GO:0005874,microtubule; GO:0031514,motile cilium; GO:0007017,microtubule-based process; GO:0044458,motile cilium assembly; GO:0008150,biological_process; GO:0009987,cellular process; GO:0006996,organelle organization; GO:0016043,cellular component organization; GO:0022607,cellular component assembly; GO:0030030,cell projecti…
Os01g0761500	0.3064	0.298	0.3022	0.883	0.501	0.6076	0.9497	0.7139	1.1855	0.4124	0.4343	0.6382	11	11	11	34	28	30	41.5	36	47	24	24	36	1.14778	0.0263131	0.087401	false	1.68268	0.000118658	0.000482436	up	NA	NA	NA	NA	1	32038024	32040378	-	Os01g0761500	TGF-beta receptor%2C type I/II extracellular region family protein	K14638 solute carrier family 15 (peptide/histidine transporter), member 3/4 | (RefSeq) protein NRT1/ PTR FAMILY 5.10 (A)	--	--	PTR6_ARATH RecName: Full=Protein NRT1/ PTR FAMILY 1.2; Short=AtNPF1.2; AltName: Full=Nitrate transporter 1.11;	Q7F4X2_ORYSJ SubName: Full=Os01g0761500 protein {ECO:0000313|EMBL:BAF06238.1}; SubName: Full=Putative nitrate transporter {ECO:0000313|EMBL:BAB92364.1};	At1g52190	GO:0016021,integral component of membrane; GO:0005634,nucleus; GO:0005886,plasma membrane; GO:0080054,low-affinity nitrate transmembrane transporter activity; GO:0015706,nitrate transport; GO:0003674,molecular_function; GO:0005215,transporter activity; GO:0008509,anion transmembrane transporter activity; GO:0015075,ion transmembrane transporter activity; GO:0015103,inorganic anion transmembrane t…
Os01g0763900	0.2468	0.4801	0.36345	1.8983	1.9418	0.8972	1.3352	1.2737	1.3967	1.332	1.4029	1.1387	4	8	6	33	49	20	27	29	25	35	35	29	2.13719	0.000550375	0.00378067	up	1.9126	0.000436303	0.00157129	up	1.87822	0.00132028	0.00546284	up	1	32145847	32147094	-	Os01g0763900	X8 domain containing protein	K19892 glucan endo-1,3-beta-glucosidase 4 [EC:3.2.1.39] | (RefSeq) glucan endo-1,3-beta-glucosidase 1 (A)	ko00500: Starch and sucrose metabolism; ko01100: Metabolic pathways	--	PDCB2_ARATH RecName: Full=PLASMODESMATA CALLOSE-BINDING PROTEIN 2; Short=AtPDCB2; AltName: Full=Glucan endo-1,3-beta-glucosidase-like protein 3; Flags: Precursor;	A0A0N7KDT1_ORYSJ SubName: Full=Glycosyl hydrolase family protein 17-like {ECO:0000313|EMBL:BAD87138.1}; SubName: Full=Os01g0763900 protein {ECO:0000313|EMBL:BAF06252.1};	At5g08000	GO:0031225,anchored component of membrane; GO:0046658,anchored component of plasma membrane; GO:0009506,plasmodesma; GO:0001872,(1->3)-beta-D-glucan binding; GO:0030247,polysaccharide binding; GO:0009408,response to heat; GO:0003674,molecular_function; GO:0005488,binding; GO:0030246,carbohydrate binding; GO:0006950,response to stress; GO:0008150,biological_process; GO:0009266,response to temperat…
Os01g0764800	25.4471	34.6731	30.0601	0.5799	3.1158	14.7063	1.07215	1.8064	0.3379	1.6572	0.695	0.1425	1023	1433	1228	25	195	813	58.5	102	15	108	43	9	-2.28516	0.0394727	0.119265	false	-4.73847	7.1085e-15	1.00079e-13	down	-5.14026	1.31998e-09	2.03718e-08	down	1	32221378	32225121	+	GH3-2	Indole-3-acetic acid (IAA)-amido synthetase%2C Disease resistance%2C Abiotic stress toleranc	K14487 auxin responsive GH3 gene family | (RefSeq) probable indole-3-acetic acid-amido synthetase GH3.2 (A)	ko04075: Plant hormone signal transduction	--	GH32_ORYSJ RecName: Full=Probable indole-3-acetic acid-amido synthetase GH3.2; EC=6.3.2.-; AltName: Full=Auxin-responsive GH3-like protein 2; Short=OsGH3-2;	I1NRW8_ORYGL SubName: Full=Uncharacterized protein {ECO:0000313|EnsemblPlants:ORGLA01G0260800.1};	At2g14960	GO:0005737,cytoplasm; GO:0016881,acid-amino acid ligase activity; GO:0009733,response to auxin; GO:0009416,response to light stimulus; GO:0003674,molecular_function; GO:0003824,catalytic activity; GO:0016874,ligase activity; GO:0016879,ligase activity, forming carbon-nitrogen bonds; GO:0008150,biological_process; GO:0009719,response to endogenous stimulus; GO:0009725,response to hormone; GO:00100…
Os01g0765400	1.4527	1.8714	1.66205	0.7322	1.1349	1.3419	0.517	0.6429	0.3911	0.7024	0.8418	0.8247	37	49	43	20	45	47	17	23	11	29	33	33	-0.607528	0.100803	0.236607	false	-1.61813	1.73435e-05	8.20993e-05	down	-1.02027	0.00430061	0.0149445	down	1	32249975	32251602	-	OsSRP-LGC	Protease inhibitor I4%2C serpin%2C plant domain containing protein	K13963 serpin B | (RefSeq) serpin-Z1 (A)	--	--	SPZ1_ORYSJ RecName: Full=Serpin-Z1; AltName: Full=OrysaZ1;	A0A0E0N2X0_ORYRU RecName: Full=SERPIN domain-containing protein {ECO:0000259|SMART:SM00093};	At1g47710	GO:0005615,extracellular space; GO:0004867,serine-type endopeptidase inhibitor activity; GO:0010951,negative regulation of endopeptidase activity; GO:0003674,molecular_function; GO:0004857,enzyme inhibitor activity; GO:0004866,endopeptidase inhibitor activity; GO:0030234,enzyme regulator activity; GO:0030414,peptidase inhibitor activity; GO:0061134,peptidase regulator activity; GO:0061135,endopep…
Os01g0766300	94.9964	108.637	101.817	20.441	20.8689	24.4152	16.1742	14.5528	17.7956	42.4576	24.1886	21.6209	962	1131	1046.5	222	329	340	203	207	199	697	377	344	-2.1955	6.82984e-69	9.98138e-66	down	-2.62125	4.68032e-100	1.03439e-97	down	-1.74351	6.62655e-16	2.41497e-14	down	1	32289147	32289742	-	Os01g0766300	Conserved hypothetical protein	--	--	--	--	A0A0P0V8R0_ORYSJ SubName: Full=Os01g0766300 protein {ECO:0000313|EMBL:BAF06269.1};	--	--
Os01g0766400	3.3966	2.5064	2.9515	1.2013	1.9561	2.3422	0.9037	0.9589	0.8485	1.8062	0.6849	1.5282	58	44	51	22	52	55	19.5	23	16	50	18	41	-0.657225	0.0666313	0.175071	false	-1.64636	1.8622e-06	1.03354e-05	down	-1.08501	0.00935269	0.028903	down	1	32293824	32295257	+	Os01g0766400	Conserved hypothetical protein	--	--	--	--	A0A0P0V8L4_ORYSJ RecName: Full=Protein FAM33A {ECO:0000256|ARBA:ARBA00014936}; AltName: Full=Spindle and kinetochore-associated protein 2 {ECO:0000256|ARBA:ARBA00017139};	At2g24970	GO:0000940,condensed chromosome outer kinetochore; GO:0005737,cytoplasm; GO:0005876,spindle microtubule; GO:0008017,microtubule binding; GO:0051301,cell division; GO:0007059,chromosome segregation; GO:0003674,molecular_function; GO:0005488,binding; GO:0005515,protein binding; GO:0008092,cytoskeletal protein binding; GO:0015631,tubulin binding; GO:0008150,biological_process; GO:0009987,cellular pr…
[truncated: 3,934 more rows]
[truncated: 4 more columns]

## Sheet: Table S3-trans12_vs_trans0 
KEGG_pathway	ko_id	Cluster_frequency	Genome_frequency	P-value	Corrected_P-value	count	GeneID	KEGG Orthology	Up	Up_gene	Down	Down_gene	hyperlink
[truncated: 116 more rows]

## Sheet: Table S3-trans24_vs_trans0
KEGG_pathway	ko_id	Cluster_frequency	Genome_frequency	P-value	Corrected_P-value	count	GeneID	KEGG Orthology	Up	Up_gene	Down	Down_gene	hyperlink
[truncated: 123 more rows]

## Sheet: Table S3-trans48_vs_trans0
KEGG_pathway	ko_id	Cluster_frequency	Genome_frequency	P-value	Corrected_P-value	count	GeneID	KEGG Orthology	Up	Up_gene	Down	Down_gene	hyperlink
[truncated: 124 more rows]

## Sheet: Table S4-trans12_vs_trans0 
Ontology	ID	Description	GeneRatio	BgRatio	pvalue	p.adjust	Count	geneID	Up	Up_gene	Down	Down_gene
[truncated: 2,670 more rows]

## Sheet: Table S4-trans24_vs_trans0 
Ontology	ID	Description	GeneRatio	BgRatio	pvalue	p.adjust	Count	geneID	Up	Up_gene	Down	Down_gene
[truncated: 3,147 more rows]

## Sheet: Table S4-trans48_vs_trans0 
Ontology	ID	Description	GeneRatio	BgRatio	pvalue	p.adjust	Count	geneID	Up	Up_gene	Down	Down_gene
[truncated: 3,060 more rows]

[truncated: 19 more sheets: Table S5-Total metabolites , Table S5-92 DAMs, Table S6-meta24_vs_meta0_Up, Table S6-meta24_vs_meta0_Down, Table S6-meta48_vs_meta0_Up, Table S6-meta48_vs_meta0_Down, Table S6-meta72_vs_meta0_Up, Table S6-meta72_vs_meta0_Down, Table S7, Table S8-Ninequadrants_1_3_7_9, Table S8-Ninequadrants_2_4_6_8, Table S8-Ninequadrants_5, Table S9-ko00941.cor.info, Table S9-ko00944.cor.info, Table S10-meta24vsmeta0 KEGG , Table S10-meta48vsmeta0 KEGG, Table S10-meta72vsmeta0 KEGG, Table S11, Table S12]
